# Supplementary material for: A Novel Lossless Encoding Algorithm for Data Compression - Genomics Data as an Exemplar
Source: bioRxiv preprint, doi:10.1101/2020.08.24.264366, version 2 (2024-01-11)
Supplement: Supplemental_Table 9 [file 264366_file05.xlsx]

## Sheet: Sheet1
Genome	Genome Size (bytes)	Window Length	Label Length	Bin Label	Bin Size (bytes)	Compression ratio (%) using OST-DNA-bcm	Compression ratio (%) using OST-DNA-brotli	Compression ratio(%) using OST-DNA-bsc	Compression ratio (%) using OST-DNA-bzip2	Compression ratio (%) using OST-DNA-lrzip	Compression ratio (%) using OST-DNA-lzip	Compression ratio (%) using OST-DNA-xz
DNA-Genome-Picea-abies-GCA_900067695.1-2016-11-09.one_line	11960690255	25	1	A_2	4146137130	24.0804	24.3015	24.0697	26.9444	21.9763	23.7256	23.7643
DNA-Genome-Picea-abies-GCA_900067695.1-2016-11-09.one_line	11960690255	25	1	T_1	3517564775	22.6744	23.1095	22.9644	26.1767	21.5901	23.013	23.0362
DNA-Genome-Picea-abies-GCA_900067695.1-2016-11-09.one_line	11960690255	25	1	A_1	3262817100	22.595	23.1	22.8989	26.106	21.6027	22.9989	23.0173
DNA-Genome-Picea-abies-GCA_900067695.1-2016-11-09.one_line	11960690255	25	1	C_1	520029650	22.1028	22.9051	22.2345	25.9789	21.3215	22.6392	22.6924
DNA-Genome-Picea-abies-GCA_900067695.1-2016-11-09.one_line	11960690255	25	1	G_1	512691575	22.3035	23.169	22.454	26.0887	21.5687	22.8557	22.9111
DNA-Genome-Picea-abies-GCA_900067695.1-2016-11-09.one_line	11960690255	25	1	C_2	802350	23.6832	26.5676	24.3031	27.2503	26.3232	26.3444	26.3167
DNA-Genome-Picea-abies-GCA_900067695.1-2016-11-09.one_line	11960690255	25	1	T_2	337850	21.2793	25.2079	22.0465	24.7811	24.5961	24.6086	24.573
DNA-Genome-Picea-abies-GCA_900067695.1-2016-11-09.one_line	11960690255	25	1	N_1	309825	17.6396	21.1468	18.2626	20.143	21.3527	21.4276	21.3269
DNA-Genome-Picea-abies-GCA_900067695.1-2016-11-09.one_line	11960690255	50	1	A_2	5455206755	23.9055	22.4345	23.8016	26.9778	19.7157	22.0472	22.0807
DNA-Genome-Picea-abies-GCA_900067695.1-2016-11-09.one_line	11960690255	50	1	T_1	3151206700	22.7628	22.4469	22.9493	26.2918	20.477	22.3488	22.3681
DNA-Genome-Picea-abies-GCA_900067695.1-2016-11-09.one_line	11960690255	50	1	A_1	2929024350	22.7241	22.4238	22.9193	26.2607	20.4691	22.3362	22.3534
DNA-Genome-Picea-abies-GCA_900067695.1-2016-11-09.one_line	11960690255	50	1	C_1	219061000	21.206	20.7624	21.0972	25.6407	18.9327	20.6539	20.6638
DNA-Genome-Picea-abies-GCA_900067695.1-2016-11-09.one_line	11960690255	50	1	G_1	205060350	21.5734	21.2799	21.4583	25.8292	19.3764	21.0293	21.0442
DNA-Genome-Picea-abies-GCA_900067695.1-2016-11-09.one_line	11960690255	50	1	C_2	990550	23.5493	24.9401	24.0252	26.5422	24.6611	24.6218	24.6348
DNA-Genome-Picea-abies-GCA_900067695.1-2016-11-09.one_line	11960690255	50	1	T_2	140550	21.1953	24.0021	21.9139	24.1274	24.2092	24.1693	24.1537
DNA-Genome-Picea-abies-GCA_900067695.1-2016-11-09.one_line	11960690255	100	1	A_2	6348434800	23.8152	21.3152	23.6865	26.9735	18.3932	21.0311	21.0609
DNA-Genome-Picea-abies-GCA_900067695.1-2016-11-09.one_line	11960690255	100	1	T_1	2783469455	22.7854	21.8433	22.9084	26.3412	19.5396	21.7131	21.7199
DNA-Genome-Picea-abies-GCA_900067695.1-2016-11-09.one_line	11960690255	100	1	A_1	2666063900	22.7821	21.8573	22.9158	26.3318	19.5486	21.7267	21.7332
DNA-Genome-Picea-abies-GCA_900067695.1-2016-11-09.one_line	11960690255	100	1	C_1	88886100	19.994	18.5302	19.7509	24.8975	16.8999	18.6102	18.4787
DNA-Genome-Picea-abies-GCA_900067695.1-2016-11-09.one_line	11960690255	100	1	G_1	72618500	20.495	19.1821	20.2129	25.2235	17.5431	19.0221	18.9203
DNA-Genome-Picea-abies-GCA_900067695.1-2016-11-09.one_line	11960690255	100	1	C_2	1217500	23.3071	22.8925	23.5877	26.0269	22.6181	22.5812	22.5603
DNA-Genome-Picea-abies-GCA_900067695.1-2016-11-09.one_line	11960690255	125	1	A_2	6601944630	23.7988	21.0984	23.6681	26.9693	18.1458	20.8457	20.8754
DNA-Genome-Picea-abies-GCA_900067695.1-2016-11-09.one_line	11960690255	125	1	T_1	2673624250	22.795	21.6975	22.9029	26.3521	19.3221	21.56	21.5641
DNA-Genome-Picea-abies-GCA_900067695.1-2016-11-09.one_line	11960690255	125	1	A_1	2565174500	22.7903	21.7182	22.9107	26.3424	19.3267	21.5703	21.5748
DNA-Genome-Picea-abies-GCA_900067695.1-2016-11-09.one_line	11960690255	125	1	C_1	66334625	19.4757	17.9331	19.2938	24.5661	16.5073	18.0506	17.8794
DNA-Genome-Picea-abies-GCA_900067695.1-2016-11-09.one_line	11960690255	125	1	G_1	52344125	20.1097	18.5877	19.749	24.98	17.2581	18.4988	18.3708
DNA-Genome-Picea-abies-GCA_900067695.1-2016-11-09.one_line	11960690255	125	1	C_2	1268125	23.3151	22.7462	23.5649	25.9593	22.3498	22.3266	22.312
DNA-Genome-Picea-abies-GCA_900067695.1-2016-11-09.one_line	11960690255	150	1	A_2	6782101805	23.7866	20.9565	23.6565	26.9665	17.9852	20.7272	20.7576
DNA-Genome-Picea-abies-GCA_900067695.1-2016-11-09.one_line	11960690255	150	1	T_1	2584365750	22.8019	21.595	22.9049	26.3599	19.1705	21.4507	21.441
DNA-Genome-Picea-abies-GCA_900067695.1-2016-11-09.one_line	11960690255	150	1	A_1	2499351600	22.8059	21.6235	22.9217	26.3543	19.1866	21.4737	21.4761
DNA-Genome-Picea-abies-GCA_900067695.1-2016-11-09.one_line	11960690255	150	1	C_1	53241150	19.235	17.5445	18.8798	24.3358	16.3269	17.6945	17.4888
DNA-Genome-Picea-abies-GCA_900067695.1-2016-11-09.one_line	11960690255	150	1	G_1	40301100	19.9084	18.2657	19.6807	24.8085	17.1081	18.1503	17.9987
DNA-Genome-Picea-abies-GCA_900067695.1-2016-11-09.one_line	11960690255	150	1	C_2	1328850	23.2997	22.6168	23.5253	25.9455	22.1697	22.1449	22.1229
DNA-Genome-Picea-abies-GCA_900067695.1-2016-11-09.one_line	11960690255	250	1	A_2	7248390505	23.7629	20.6759	23.6376	26.96	17.6827	20.5175	20.5487
DNA-Genome-Picea-abies-GCA_900067695.1-2016-11-09.one_line	11960690255	250	1	T_1	2363638000	22.8472	21.4294	22.9414	26.389	18.913	21.2675	21.269
DNA-Genome-Picea-abies-GCA_900067695.1-2016-11-09.one_line	11960690255	250	1	A_1	2295712250	22.8569	21.4736	22.9635	26.3828	18.9377	21.2996	21.3
DNA-Genome-Picea-abies-GCA_900067695.1-2016-11-09.one_line	11960690255	250	1	C_1	30076000	18.5389	17.0599	18.3603	23.6775	16.2915	17.1759	16.9357
DNA-Genome-Picea-abies-GCA_900067695.1-2016-11-09.one_line	11960690255	250	1	G_1	21420000	19.2855	17.9694	19.0396	24.2468	17.0692	17.6015	17.4294
DNA-Genome-Picea-abies-GCA_900067695.1-2016-11-09.one_line	11960690255	250	1	C_2	1453500	23.2843	22.5372	23.4784	25.868	21.8248	21.8091	21.7827
DNA-Genome-Picea-abies-GCA_900067695.1-2016-11-09.one_line	11960690255	500	1	A_2	7947460255	23.7345	20.5009	23.6233	26.942	17.495	20.423	20.4553
DNA-Genome-Picea-abies-GCA_900067695.1-2016-11-09.one_line	11960690255	500	1	T_1	2020764500	22.9469	21.5285	23.056	26.4335	18.9144	21.2846	21.282
DNA-Genome-Picea-abies-GCA_900067695.1-2016-11-09.one_line	11960690255	500	1	A_1	1970940500	22.9639	21.5669	23.0855	26.4272	18.9522	21.3256	21.3191
DNA-Genome-Picea-abies-GCA_900067695.1-2016-11-09.one_line	11960690255	500	1	C_1	12005500	18.3706	18.1071	18.5796	22.8608	17.5497	17.7655	17.5795
DNA-Genome-Picea-abies-GCA_900067695.1-2016-11-09.one_line	11960690255	500	1	G_1	7990500	19.2305	18.9937	19.4589	23.4064	18.2476	18.3515	18.2411
DNA-Genome-Picea-abies-GCA_900067695.1-2016-11-09.one_line	11960690255	500	1	C_2	1529000	23.1165	22.0729	23.2866	25.6878	21.0126	21.0225	20.9787
DNA-Genome-Picea-abies-GCA_900067695.1-2016-11-09.one_line	11960690255	750	1	A_2	8370594005	23.7202	20.4666	23.6214	26.9306	17.4784	20.4372	20.469
DNA-Genome-Picea-abies-GCA_900067695.1-2016-11-09.one_line	11960690255	750	1	T_1	1810146000	23.0093	21.6634	23.1372	26.4586	19.0269	21.3716	21.367
DNA-Genome-Picea-abies-GCA_900067695.1-2016-11-09.one_line	11960690255	750	1	A_1	1768943250	23.0289	21.7221	23.1681	26.4508	19.0681	21.415	21.4085
DNA-Genome-Picea-abies-GCA_900067695.1-2016-11-09.one_line	11960690255	750	1	C_1	5930250	18.0424	18.4974	18.2984	21.9226	18.1571	18.2858	18.1436
DNA-Genome-Picea-abies-GCA_900067695.1-2016-11-09.one_line	11960690255	750	1	G_1	3678750	18.6658	19.1808	18.9425	22.2268	18.8327	18.8927	18.817
DNA-Genome-Picea-abies-GCA_900067695.1-2016-11-09.one_line	11960690255	750	1	C_2	1398000	23.1162	21.8379	23.2549	25.6307	20.6725	20.676	20.671
DNA-Genome-Picea-abies-GCA_900067695.1-2016-11-09.one_line	11960690255	1000	1	A_2	8672172255	23.7134	20.4921	23.6228	26.9224	17.5056	20.4664	20.4991
DNA-Genome-Picea-abies-GCA_900067695.1-2016-11-09.one_line	11960690255	1000	1	T_1	1657777000	23.0532	21.8025	23.1981	26.4765	19.1406	21.4562	21.449
DNA-Genome-Picea-abies-GCA_900067695.1-2016-11-09.one_line	11960690255	1000	1	A_1	1623626000	23.0713	21.8364	23.2199	26.4671	19.1817	21.4958	21.5072
DNA-Genome-Picea-abies-GCA_900067695.1-2016-11-09.one_line	11960690255	1000	1	C_1	3591000	17.5611	18.3376	17.8106	21.2079	17.9951	18.1082	17.9668
DNA-Genome-Picea-abies-GCA_900067695.1-2016-11-09.one_line	11960690255	1000	1	G_1	2183000	17.9574	18.6816	18.2437	21.3426	18.4163	18.4612	18.3679
DNA-Genome-Picea-abies-GCA_900067695.1-2016-11-09.one_line	11960690255	1000	1	C_2	1341000	22.9549	21.3051	23.0646	25.4486	20.0986	20.072	20.1098
DNA-Genome-Picea-abies-GCA_900067695.1-2016-11-09.one_line	11960690255	2500	1	A_2	9628170255	23.6989	20.5986	23.6403	26.8994	17.645	20.6143	20.6469
DNA-Genome-Picea-abies-GCA_900067695.1-2016-11-09.one_line	11960690255	2500	1	T_1	1175370000	23.1818	22.2868	23.3715	26.5187	19.6264	21.7822	21.7962
DNA-Genome-Picea-abies-GCA_900067695.1-2016-11-09.one_line	11960690255	2500	1	A_1	1155225000	23.196	22.3106	23.3884	26.5088	19.6649	21.8222	21.846
DNA-Genome-Picea-abies-GCA_900067695.1-2016-11-09.one_line	11960690255	2500	1	C_2	872500	22.0496	19.9932	22.1841	24.1199	18.7166	18.6717	18.648
DNA-Genome-Picea-abies-GCA_900067695.1-2016-11-09.one_line	11960690255	2500	1	C_1	582500	17.3409	18.0081	17.667	20.1004	17.9821	17.9739	17.955
DNA-Genome-Picea-abies-GCA_900067695.1-2016-11-09.one_line	11960690255	2500	1	G_1	470000	18.3434	18.9517	18.7136	21.1828	18.8938	18.8406	18.8655
DNA-Genome-Picea-abies-GCA_900067695.1-2016-11-09.one_line	11960690255	5000	1	A_2	10334700255	23.6936	20.7154	23.6604	26.8835	17.8067	20.7489	20.7815
DNA-Genome-Picea-abies-GCA_900067695.1-2016-11-09.one_line	11960690255	5000	1	T_1	817465000	23.2626	22.6097	23.4786	26.5444	19.9838	22.0442	22.0481
DNA-Genome-Picea-abies-GCA_900067695.1-2016-11-09.one_line	11960690255	5000	1	A_1	807965000	23.2705	22.6167	23.4859	26.5318	20.0079	22.0627	22.087
DNA-Genome-Picea-abies-GCA_900067695.1-2016-11-09.one_line	11960690255	5000	1	C_2	405000	21.2642	19.14	21.4222	23.2296	18.3277	18.2948	18.2667
DNA-Genome-Picea-abies-GCA_900067695.1-2016-11-09.one_line	11960690255	5000	1	C_1	100000	14.791	15.317	15.178	17.425	15.808	15.465	15.636
DNA-Genome-Picea-abies-GCA_900067695.1-2016-11-09.one_line	11960690255	5000	1	G_1	55000	18.2073	18.8	18.6691	20.8873	19.6327	19.2127	19.4036
DNA-Genome-Picea-abies-GCA_900067695.1-2016-11-09.one_line	11960690255	10000	1	A_2	11009490255	23.6878	20.8177	23.6745	26.8684	17.9641	20.8655	20.8985
DNA-Genome-Picea-abies-GCA_900067695.1-2016-11-09.one_line	11960690255	10000	1	T_1	478260000	23.3397	22.8822	23.5787	26.5647	20.306	22.253	22.2654
DNA-Genome-Picea-abies-GCA_900067695.1-2016-11-09.one_line	11960690255	10000	1	A_1	472860000	23.3454	22.8566	23.5792	26.5514	20.3186	22.2418	22.2687
DNA-Genome-Picea-abies-GCA_900067695.1-2016-11-09.one_line	11960690255	10000	1	C_2	80000	22.7238	23.0175	23.0425	24.995	23.44	23.4225	23.35
DNA-Genome-Picea-abies-GCA_900067695.1-2016-11-09.one_line	11960690255	25	2	AC_22	4143816355	24.0788	24.2827	24.0665	26.9391	21.9738	23.7236	23.7622
DNA-Genome-Picea-abies-GCA_900067695.1-2016-11-09.one_line	11960690255	25	2	TA_12	2242473825	22.2875	23.0731	22.6885	25.9473	22.0206	23.1023	23.1224
DNA-Genome-Picea-abies-GCA_900067695.1-2016-11-09.one_line	11960690255	25	2	AT_12	1790451925	22.2645	23.1413	22.6721	25.9216	22.2006	23.1982	23.2155
DNA-Genome-Picea-abies-GCA_900067695.1-2016-11-09.one_line	11960690255	25	2	AC_12	844807225	21.9868	22.8305	22.3058	25.8379	21.805	22.8738	22.9094
DNA-Genome-Picea-abies-GCA_900067695.1-2016-11-09.one_line	11960690255	25	2	TC_12	760138925	22.012	22.7002	22.2705	25.9063	21.5026	22.7001	22.7437
DNA-Genome-Picea-abies-GCA_900067695.1-2016-11-09.one_line	11960690255	25	2	AG_12	613479025	21.9805	22.7744	22.2893	25.8105	21.6677	22.7783	22.8228
DNA-Genome-Picea-abies-GCA_900067695.1-2016-11-09.one_line	11960690255	25	2	TG_12	514282375	21.9782	22.8737	22.2509	25.7783	21.8543	22.8828	22.9183
DNA-Genome-Picea-abies-GCA_900067695.1-2016-11-09.one_line	11960690255	25	2	GA_12	297354300	21.738	22.4822	21.9496	25.7281	21.2819	22.4143	22.4769
DNA-Genome-Picea-abies-GCA_900067695.1-2016-11-09.one_line	11960690255	25	2	CA_12	273834150	21.6467	22.3993	21.8278	25.7078	21.2381	22.3352	22.3955
DNA-Genome-Picea-abies-GCA_900067695.1-2016-11-09.one_line	11960690255	25	2	CT_12	223144200	21.6334	22.3647	21.7832	25.6933	21.2312	22.3259	22.3951
DNA-Genome-Picea-abies-GCA_900067695.1-2016-11-09.one_line	11960690255	25	2	GT_12	188779050	21.7749	22.6002	21.9422	25.7813	21.4886	22.4905	22.5514
DNA-Genome-Picea-abies-GCA_900067695.1-2016-11-09.one_line	11960690255	25	2	GC_12	26519400	20.553	21.4922	20.3878	24.853	20.8649	21.0953	21.1744
DNA-Genome-Picea-abies-GCA_900067695.1-2016-11-09.one_line	11960690255	25	2	CG_12	21755850	20.4235	21.2242	20.2664	24.6979	20.7977	20.9352	21.0232
DNA-Genome-Picea-abies-GCA_900067695.1-2016-11-09.one_line	11960690255	25	2	AT_11	12350250	9.5587	10.422	9.6548	12.5393	10.9814	11.5833	10.9855
DNA-Genome-Picea-abies-GCA_900067695.1-2016-11-09.one_line	11960690255	25	2	AT_22	1958950	23.8529	26.596	24.4412	27.6812	26.2103	26.2042	26.2081
DNA-Genome-Picea-abies-GCA_900067695.1-2016-11-09.one_line	11960690255	25	2	CT_11	1254975	8.2009	9.6649	8.3273	10.6156	9.8116	10.4436	9.8316
DNA-Genome-Picea-abies-GCA_900067695.1-2016-11-09.one_line	11960690255	25	2	AG_11	1048650	8.2539	9.6975	8.387	10.6405	9.8986	10.5016	9.9362
DNA-Genome-Picea-abies-GCA_900067695.1-2016-11-09.one_line	11960690255	25	2	CT_22	722925	23.8254	26.7076	24.4792	27.4359	26.4693	26.5158	26.4974
DNA-Genome-Picea-abies-GCA_900067695.1-2016-11-09.one_line	11960690255	25	2	AC_11	364875	4.5215	5.8124	4.6536	5.9977	6.4099	6.8933	6.3847
DNA-Genome-Picea-abies-GCA_900067695.1-2016-11-09.one_line	11960690255	25	2	AG_22	361825	21.3548	25.3233	22.0996	24.8678	24.6102	24.592	24.582
DNA-Genome-Picea-abies-GCA_900067695.1-2016-11-09.one_line	11960690255	25	2	TG_11	356475	4.5829	5.8517	4.7195	6.0843	6.507	6.934	6.4756
DNA-Genome-Picea-abies-GCA_900067695.1-2016-11-09.one_line	11960690255	25	2	TG_22	337850	21.2793	25.2079	22.0465	24.7811	24.5961	24.6086	24.573
DNA-Genome-Picea-abies-GCA_900067695.1-2016-11-09.one_line	11960690255	25	2	AC_13	183000	23.224	25.9978	24.0929	27.1814	26.1344	26.1869	26.1071
DNA-Genome-Picea-abies-GCA_900067695.1-2016-11-09.one_line	11960690255	25	2	TA_13	181550	23.1226	25.9521	23.9857	27.1688	26.0463	26.0193	25.9719
DNA-Genome-Picea-abies-GCA_900067695.1-2016-11-09.one_line	11960690255	25	2	AN_12	129025	18.3585	21.9213	19.204	22.1182	22.0694	22.0314	22.0174
DNA-Genome-Picea-abies-GCA_900067695.1-2016-11-09.one_line	11960690255	25	2	TN_12	128075	18.3385	22.1831	19.2075	22.0714	22.1011	21.9684	22.0496
DNA-Genome-Picea-abies-GCA_900067695.1-2016-11-09.one_line	11960690255	25	2	NA_12	112550	16.653	20.0649	17.4127	19.3825	20.8903	20.8219	20.8476
DNA-Genome-Picea-abies-GCA_900067695.1-2016-11-09.one_line	11960690255	25	2	NT_12	100150	16.9346	20.3894	17.7194	19.6575	21.2242	21.1503	21.2282
DNA-Genome-Picea-abies-GCA_900067695.1-2016-11-09.one_line	11960690255	25	2	CG_22	79425	21.628	25.7891	22.4992	24.9632	25.8735	25.8319	25.8004
DNA-Genome-Picea-abies-GCA_900067695.1-2016-11-09.one_line	11960690255	25	2	NA_13	51100	17.865	21.5871	18.544	19.7084	22.8219	22.4755	22.6771
DNA-Genome-Picea-abies-GCA_900067695.1-2016-11-09.one_line	11960690255	25	2	NC_12	23700	17.0928	20.5401	18.1435	19.8186	22.8059	22.3038	22.4979
DNA-Genome-Picea-abies-GCA_900067695.1-2016-11-09.one_line	11960690255	25	2	NG_12	22325	17.3169	20.7167	18.4188	20.1344	23.1041	22.5577	22.8085
DNA-Genome-Picea-abies-GCA_900067695.1-2016-11-09.one_line	11960690255	25	2	CA_13	18500	23.3568	26.0649	24.6595	27.2811	28.5676	28.0919	28.1946
DNA-Genome-Picea-abies-GCA_900067695.1-2016-11-09.one_line	11960690255	25	2	GA_13	18350	23.1553	25.7384	24.4469	27.1172	28.2016	27.6458	27.8365
DNA-Genome-Picea-abies-GCA_900067695.1-2016-11-09.one_line	11960690255	25	2	CN_12	17325	17.2525	20.5945	18.355	20.4675	22.6494	22.1472	22.2338
DNA-Genome-Picea-abies-GCA_900067695.1-2016-11-09.one_line	11960690255	25	2	GN_12	17325	17.1602	20.6869	18.355	20.3636	22.9784	22.4069	22.6032
DNA-Genome-Picea-abies-GCA_900067695.1-2016-11-09.one_line	11960690255	25	2	TN_11	2475	6.2626	7.2727	7.7576	8.5253	17.4141	9.8586	10.6667
DNA-Genome-Picea-abies-GCA_900067695.1-2016-11-09.one_line	11960690255	25	2	C_1	2025	1.5802	0.5926	3.358	2.2222	7.4074	2.4691	4.1481
DNA-Genome-Picea-abies-GCA_900067695.1-2016-11-09.one_line	11960690255	25	2	G_1	2000	1.6	0.6	3.4	2.25	7.5	2.5	4.2
DNA-Genome-Picea-abies-GCA_900067695.1-2016-11-09.one_line	11960690255	25	2	CG_11	1725	8.9855	10.1449	11.2464	13.1014	19.942	13.2754	14.8406
DNA-Genome-Picea-abies-GCA_900067695.1-2016-11-09.one_line	11960690255	25	2	A_1	1650	1.9394	0.7273	4.1212	2.6667	9.1515	2.9091	4.8485
DNA-Genome-Picea-abies-GCA_900067695.1-2016-11-09.one_line	11960690255	25	2	AN_11	1475	7.4576	9.1525	9.7627	9.8983	25.6271	11.5254	13.2881
DNA-Genome-Picea-abies-GCA_900067695.1-2016-11-09.one_line	11960690255	25	2	GN_11	1150	8.3478	8.9565	10.9565	10.9565	25.3043	12.6087	14.6087
DNA-Genome-Picea-abies-GCA_900067695.1-2016-11-09.one_line	11960690255	25	2	T_1	1075	2.9767	1.1163	6.3256	4.186	13.6744	4.093	7.0698
DNA-Genome-Picea-abies-GCA_900067695.1-2016-11-09.one_line	11960690255	25	2	CN_11	900	9.4444	9.7778	12.6667	12.4444	32.3333	13.6667	16.8889
DNA-Genome-Picea-abies-GCA_900067695.1-2016-11-09.one_line	11960690255	50	2	AC_22	5450713605	23.9052	22.3995	23.8004	26.9756	19.7163	22.0479	22.0819
DNA-Genome-Picea-abies-GCA_900067695.1-2016-11-09.one_line	11960690255	50	2	TA_12	2217421600	22.5475	22.5898	22.809	26.1583	20.8999	22.5585	22.5776
DNA-Genome-Picea-abies-GCA_900067695.1-2016-11-09.one_line	11960690255	50	2	AT_12	1955959400	22.514	22.5915	22.7805	26.1369	20.9424	22.5747	22.5955
DNA-Genome-Picea-abies-GCA_900067695.1-2016-11-09.one_line	11960690255	50	2	TC_12	574482300	21.8888	21.4053	21.8864	25.9896	19.6282	21.3573	21.3978
DNA-Genome-Picea-abies-GCA_900067695.1-2016-11-09.one_line	11960690255	50	2	AG_12	495546700	21.9096	21.5207	21.9466	25.9317	19.7735	21.4583	21.5013
DNA-Genome-Picea-abies-GCA_900067695.1-2016-11-09.one_line	11960690255	50	2	AC_12	475539750	21.8517	21.6591	21.9034	25.9247	20.0007	21.673	21.7005
DNA-Genome-Picea-abies-GCA_900067695.1-2016-11-09.one_line	11960690255	50	2	TG_12	358895450	21.7767	21.5398	21.7656	25.7912	19.9082	21.5453	21.5757
DNA-Genome-Picea-abies-GCA_900067695.1-2016-11-09.one_line	11960690255	50	2	GA_12	123166400	21.0982	20.7296	21.0245	25.503	19.2049	20.6475	20.6757
DNA-Genome-Picea-abies-GCA_900067695.1-2016-11-09.one_line	11960690255	50	2	CT_12	114293500	20.7061	20.2622	20.6319	25.3047	18.8301	20.28	20.2954
DNA-Genome-Picea-abies-GCA_900067695.1-2016-11-09.one_line	11960690255	50	2	CA_12	97700050	20.6073	20.2506	20.496	25.2801	18.9231	20.2413	20.2373
DNA-Genome-Picea-abies-GCA_900067695.1-2016-11-09.one_line	11960690255	50	2	GT_12	74743200	20.8713	20.5487	20.6791	25.3823	19.2974	20.4365	20.4399
DNA-Genome-Picea-abies-GCA_900067695.1-2016-11-09.one_line	11960690255	50	2	GC_12	7128050	18.9205	19.5835	19.0393	23.2237	18.8004	18.8675	18.789
DNA-Genome-Picea-abies-GCA_900067695.1-2016-11-09.one_line	11960690255	50	2	CG_12	6910200	18.7393	19.1413	18.845	23.0704	18.6167	18.6757	18.6116
DNA-Genome-Picea-abies-GCA_900067695.1-2016-11-09.one_line	11960690255	50	2	AT_22	4325850	23.251	24.513	23.6664	26.9152	24.0516	24.0322	24.0417
DNA-Genome-Picea-abies-GCA_900067695.1-2016-11-09.one_line	11960690255	50	2	AT_11	1456500	7.3686	8.1057	7.4604	9.6176	9.0591	9.4695	9.0483
DNA-Genome-Picea-abies-GCA_900067695.1-2016-11-09.one_line	11960690255	50	2	CT_22	972300	23.59	24.9831	24.0718	26.5613	24.6758	24.6506	24.6586
DNA-Genome-Picea-abies-GCA_900067695.1-2016-11-09.one_line	11960690255	50	2	TA_13	356000	21.6949	23.8567	22.4017	25.0407	23.5525	23.4958	23.5202
DNA-Genome-Picea-abies-GCA_900067695.1-2016-11-09.one_line	11960690255	50	2	AC_13	354800	21.7139	23.7573	22.4262	25.0967	23.52	23.4428	23.4735
DNA-Genome-Picea-abies-GCA_900067695.1-2016-11-09.one_line	11960690255	50	2	AG_22	167300	21.3724	24.3126	22.1148	24.4573	24.5678	24.5505	24.4806
DNA-Genome-Picea-abies-GCA_900067695.1-2016-11-09.one_line	11960690255	50	2	TG_22	140550	21.1953	24.0021	21.9139	24.1274	24.2092	24.1693	24.1537
DNA-Genome-Picea-abies-GCA_900067695.1-2016-11-09.one_line	11960690255	50	2	CT_11	134050	6.038	7.5517	6.2051	7.6136	8.1992	8.5513	8.0239
DNA-Genome-Picea-abies-GCA_900067695.1-2016-11-09.one_line	11960690255	50	2	AG_11	114250	5.9589	7.3996	6.1724	7.4608	8.1374	8.4298	7.8915
DNA-Genome-Picea-abies-GCA_900067695.1-2016-11-09.one_line	11960690255	50	2	AC_11	43250	2.1873	2.9434	2.5295	3.1514	4.4763	3.7688	3.6439
DNA-Genome-Picea-abies-GCA_900067695.1-2016-11-09.one_line	11960690255	50	2	TG_11	40300	2.3127	3.0422	2.6799	3.2754	4.7171	3.871	3.7618
DNA-Genome-Picea-abies-GCA_900067695.1-2016-11-09.one_line	11960690255	50	2	CA_13	21700	21.5806	24.2995	22.6452	25	25.9816	25.4977	25.6406
DNA-Genome-Picea-abies-GCA_900067695.1-2016-11-09.one_line	11960690255	50	2	GA_13	20500	21.4195	23.922	22.478	24.6927	25.6634	25.1366	25.3268
DNA-Genome-Picea-abies-GCA_900067695.1-2016-11-09.one_line	11960690255	50	2	CG_22	18250	22.1041	24.6959	23.1781	24.9699	26.9041	26.3288	26.4986
DNA-Genome-Picea-abies-GCA_900067695.1-2016-11-09.one_line	11960690255	50	2	TN_12	11050	16.1719	18.9412	17.448	19.3484	23.0498	20.8326	21.3575
DNA-Genome-Picea-abies-GCA_900067695.1-2016-11-09.one_line	11960690255	50	2	AN_12	9700	16.866	19.3918	18.1031	20.268	23.4021	21.9175	22.3918
DNA-Genome-Picea-abies-GCA_900067695.1-2016-11-09.one_line	11960690255	50	2	GN_12	2200	17.4545	18.5909	18.7273	20.3182	30.4091	23.6364	25.0909
DNA-Genome-Picea-abies-GCA_900067695.1-2016-11-09.one_line	11960690255	50	2	CN_12	1500	19.4667	20.3333	20.9333	22.9333	33.7333	26.4	28.8
DNA-Genome-Picea-abies-GCA_900067695.1-2016-11-09.one_line	11960690255	100	2	AC_22	6340202600	23.8154	21.2896	23.686	26.9712	18.3953	21.034	21.0634
DNA-Genome-Picea-abies-GCA_900067695.1-2016-11-09.one_line	11960690255	100	2	TA_12	2187242155	22.6692	21.9942	22.839	26.2664	19.8271	21.8916	21.8868
DNA-Genome-Picea-abies-GCA_900067695.1-2016-11-09.one_line	11960690255	100	2	AT_12	2067590500	22.6638	22.0044	22.84	26.2618	19.8435	21.906	21.912
DNA-Genome-Picea-abies-GCA_900067695.1-2016-11-09.one_line	11960690255	100	2	TC_12	393585700	21.4894	19.8645	21.2834	25.8885	17.6787	19.6954	19.6677
DNA-Genome-Picea-abies-GCA_900067695.1-2016-11-09.one_line	11960690255	100	2	AG_12	350525700	21.5497	20.0301	21.4211	25.8706	17.8296	19.8108	19.7871
DNA-Genome-Picea-abies-GCA_900067695.1-2016-11-09.one_line	11960690255	100	2	AC_12	247598500	21.2704	19.9358	21.1287	25.7284	17.8737	19.9141	19.8494
DNA-Genome-Picea-abies-GCA_900067695.1-2016-11-09.one_line	11960690255	100	2	TG_12	202355100	21.2225	19.8736	21.0201	25.599	17.8483	19.8271	19.7564
DNA-Genome-Picea-abies-GCA_900067695.1-2016-11-09.one_line	11960690255	100	2	CT_12	56798300	19.6088	18.3156	19.3978	24.5162	17.1177	18.4293	18.2938
DNA-Genome-Picea-abies-GCA_900067695.1-2016-11-09.one_line	11960690255	100	2	GA_12	48404300	20.048	18.9095	19.8789	24.8952	17.7384	18.8377	18.7406
DNA-Genome-Picea-abies-GCA_900067695.1-2016-11-09.one_line	11960690255	100	2	CA_12	29740700	18.8847	17.8915	18.6715	24.2349	17.0121	17.7704	17.5487
DNA-Genome-Picea-abies-GCA_900067695.1-2016-11-09.one_line	11960690255	100	2	GT_12	22117100	19.397	18.339	18.9186	24.4352	17.557	18.0867	17.8942
DNA-Genome-Picea-abies-GCA_900067695.1-2016-11-09.one_line	11960690255	100	2	AT_22	8232200	22.7109	22.0999	22.9461	26.5278	21.6288	21.6634	21.6168
DNA-Genome-Picea-abies-GCA_900067695.1-2016-11-09.one_line	11960690255	100	2	CG_12	2334800	17.3954	17.4635	17.4669	20.6309	16.7619	16.936	16.7281
DNA-Genome-Picea-abies-GCA_900067695.1-2016-11-09.one_line	11960690255	100	2	GC_12	2092200	17.6694	17.548	17.7615	20.8079	17.0072	17.1783	16.9708
DNA-Genome-Picea-abies-GCA_900067695.1-2016-11-09.one_line	11960690255	100	2	CT_22	1217500	23.3071	22.8925	23.5877	26.0269	22.6181	22.5812	22.5603
DNA-Genome-Picea-abies-GCA_900067695.1-2016-11-09.one_line	11960690255	100	2	TA_13	285700	21.7315	21.8768	22.252	24.4704	21.9097	21.7861	21.7907
DNA-Genome-Picea-abies-GCA_900067695.1-2016-11-09.one_line	11960690255	100	2	AC_13	275800	21.7893	21.9953	22.3437	24.5649	22.091	21.9801	21.984
DNA-Genome-Picea-abies-GCA_900067695.1-2016-11-09.one_line	11960690255	100	2	AT_11	67400	5.6484	6.1395	5.9881	7.2196	7.4659	7.4985	7.3531
DNA-Genome-Picea-abies-GCA_900067695.1-2016-11-09.one_line	11960690255	100	2	CA_13	6200	23.7581	24.0968	24.8065	26.8871	29.0484	27.3548	27.8065
DNA-Genome-Picea-abies-GCA_900067695.1-2016-11-09.one_line	11960690255	100	2	CT_11	6100	7.7869	9.0328	8.5902	9.377	12.4426	10.4262	10.7541
DNA-Genome-Picea-abies-GCA_900067695.1-2016-11-09.one_line	11960690255	100	2	GA_13	4900	23.7551	24.1837	24.898	27.3061	30.3061	27.7347	28.4082
DNA-Genome-Picea-abies-GCA_900067695.1-2016-11-09.one_line	11960690255	100	2	AG_11	3800	7.8947	9.5263	9.0526	9.5	14.6053	11.1053	11.7895
DNA-Genome-Picea-abies-GCA_900067695.1-2016-11-09.one_line	11960690255	100	2	AC_11	2200	3.0909	2.7727	4.8182	3.7273	10.7273	4.6364	6.1818
DNA-Genome-Picea-abies-GCA_900067695.1-2016-11-09.one_line	11960690255	100	2	TG_11	800	6.625	3.625	10	7	23.625	7.5	11.5
DNA-Genome-Picea-abies-GCA_900067695.1-2016-11-09.one_line	11960690255	125	2	AC_22	6591534130	23.7988	21.0759	23.6692	26.9677	18.1488	20.8489	20.8786
DNA-Genome-Picea-abies-GCA_900067695.1-2016-11-09.one_line	11960690255	125	2	TA_12	2168530625	22.6975	21.8372	22.8477	26.29	19.5644	21.7164	21.7189
DNA-Genome-Picea-abies-GCA_900067695.1-2016-11-09.one_line	11960690255	125	2	AT_12	2064187000	22.6902	21.8296	22.8489	26.2846	19.5714	21.7236	21.7259
DNA-Genome-Picea-abies-GCA_900067695.1-2016-11-09.one_line	11960690255	125	2	TC_12	341797500	21.3364	19.4237	21.0864	25.8335	17.1657	19.2163	19.174
DNA-Genome-Picea-abies-GCA_900067695.1-2016-11-09.one_line	11960690255	125	2	AG_12	304447250	21.4153	19.5789	21.2339	25.8237	17.3189	19.3287	19.2906
DNA-Genome-Picea-abies-GCA_900067695.1-2016-11-09.one_line	11960690255	125	2	AC_12	196305875	21.0375	19.3633	20.8418	25.6282	17.2631	19.3483	19.2574
DNA-Genome-Picea-abies-GCA_900067695.1-2016-11-09.one_line	11960690255	125	2	TG_12	163077750	21.0141	19.3322	20.7668	25.5127	17.2706	19.2766	19.1854
DNA-Genome-Picea-abies-GCA_900067695.1-2016-11-09.one_line	11960690255	125	2	CT_12	44367875	19.2116	17.868	18.9911	24.1766	16.8199	17.9761	17.8132
DNA-Genome-Picea-abies-GCA_900067695.1-2016-11-09.one_line	11960690255	125	2	GA_12	36012000	19.8326	18.5797	19.7119	24.677	17.5352	18.4393	18.3198
DNA-Genome-Picea-abies-GCA_900067695.1-2016-11-09.one_line	11960690255	125	2	CA_12	20418375	18.3152	17.1547	17.8982	23.6754	16.4194	17.0007	16.717
DNA-Genome-Picea-abies-GCA_900067695.1-2016-11-09.one_line	11960690255	125	2	GT_12	14993750	18.5197	17.8196	18.631	23.942	17.0299	17.4054	17.1714
DNA-Genome-Picea-abies-GCA_900067695.1-2016-11-09.one_line	11960690255	125	2	AT_22	10410500	22.593	21.7045	22.7953	26.5379	21.1585	21.2203	21.1503
DNA-Genome-Picea-abies-GCA_900067695.1-2016-11-09.one_line	11960690255	125	2	CG_12	1545125	17.1802	16.9604	17.2483	19.8389	16.3315	16.5161	16.3226
DNA-Genome-Picea-abies-GCA_900067695.1-2016-11-09.one_line	11960690255	125	2	GC_12	1336000	17.4472	17.2778	17.5319	20.0418	16.635	16.8147	16.612
DNA-Genome-Picea-abies-GCA_900067695.1-2016-11-09.one_line	11960690255	125	2	CT_22	1268125	23.3151	22.7462	23.5649	25.9593	22.3498	22.3266	22.312
DNA-Genome-Picea-abies-GCA_900067695.1-2016-11-09.one_line	11960690255	125	2	TA_13	218000	22.0803	22.0775	22.5229	24.7725	22.1477	22.1005	22.0771
DNA-Genome-Picea-abies-GCA_900067695.1-2016-11-09.one_line	11960690255	125	2	AC_13	215375	22.0898	22.0337	22.5588	24.8441	22.2389	22.12	22.1456
DNA-Genome-Picea-abies-GCA_900067695.1-2016-11-09.one_line	11960690255	125	2	AT_11	17125	6.3766	6.6861	6.8204	8.1285	8.5606	8.1285	8.1518
DNA-Genome-Picea-abies-GCA_900067695.1-2016-11-09.one_line	11960690255	125	2	GA_13	2375	25.5158	24.9263	26.8632	29.2211	34.7368	30.4421	31.6632
DNA-Genome-Picea-abies-GCA_900067695.1-2016-11-09.one_line	11960690255	125	2	CA_13	1875	27.2	27.0933	28.8	31.5733	39.1467	33.7067	35.4133
DNA-Genome-Picea-abies-GCA_900067695.1-2016-11-09.one_line	11960690255	125	2	CT_11	1375	11.7091	12	14.1091	14.3273	22.6182	14.9091	17.4545
DNA-Genome-Picea-abies-GCA_900067695.1-2016-11-09.one_line	11960690255	125	2	AC_11	1000	5.1	3.3	8.4	6.2	18.9	6.7	10
DNA-Genome-Picea-abies-GCA_900067695.1-2016-11-09.one_line	11960690255	125	2	AG_11	875	12.1143	12.1143	15.5429	14.0571	28.2286	16.1143	19.6571
DNA-Genome-Picea-abies-GCA_900067695.1-2016-11-09.one_line	11960690255	125	2	TG_11	375	11.4667	5.0667	17.6	12.2667	44	12.8	21.3333
DNA-Genome-Picea-abies-GCA_900067695.1-2016-11-09.one_line	11960690255	150	2	AC_22	6769446305	23.7872	20.9227	23.6569	26.9654	17.9886	20.7309	20.7613
DNA-Genome-Picea-abies-GCA_900067695.1-2016-11-09.one_line	11960690255	150	2	TA_12	2145105150	22.7178	21.7181	22.8533	26.3069	19.3793	21.5883	21.5884
DNA-Genome-Picea-abies-GCA_900067695.1-2016-11-09.one_line	11960690255	150	2	AT_12	2066824050	22.7211	21.7339	22.8647	26.3058	19.3933	21.605	21.6058
DNA-Genome-Picea-abies-GCA_900067695.1-2016-11-09.one_line	11960690255	150	2	TC_12	303483300	21.2041	19.0836	20.9509	25.7844	16.7949	18.8532	18.7966
DNA-Genome-Picea-abies-GCA_900067695.1-2016-11-09.one_line	11960690255	150	2	AG_12	271074150	21.301	19.2399	21.0937	25.7823	16.9421	18.9579	18.9068
DNA-Genome-Picea-abies-GCA_900067695.1-2016-11-09.one_line	11960690255	150	2	AC_12	161289150	20.85	18.9161	20.593	25.5363	16.826	18.9151	18.798
DNA-Genome-Picea-abies-GCA_900067695.1-2016-11-09.one_line	11960690255	150	2	TG_12	135610500	20.8292	18.9222	20.5478	25.4336	16.8597	18.8608	18.7437
DNA-Genome-Picea-abies-GCA_900067695.1-2016-11-09.one_line	11960690255	150	2	CT_12	37258650	18.9848	17.6297	18.8284	23.9499	16.6847	17.7125	17.527
DNA-Genome-Picea-abies-GCA_900067695.1-2016-11-09.one_line	11960690255	150	2	GA_12	28554600	19.6432	18.3362	19.4252	24.5134	17.4545	18.1859	18.0507
DNA-Genome-Picea-abies-GCA_900067695.1-2016-11-09.one_line	11960690255	150	2	CA_12	14943300	17.5175	16.5649	17.6289	23.2002	15.9811	16.4397	16.1065
DNA-Genome-Picea-abies-GCA_900067695.1-2016-11-09.one_line	11960690255	150	2	AT_22	12655500	22.5021	21.4622	22.6864	26.539	20.843	20.9579	20.8719
DNA-Genome-Picea-abies-GCA_900067695.1-2016-11-09.one_line	11960690255	150	2	GT_12	10864200	18.3409	17.4026	18.4441	23.5237	16.6227	16.9188	16.6433
DNA-Genome-Picea-abies-GCA_900067695.1-2016-11-09.one_line	11960690255	150	2	CT_22	1328850	23.2997	22.6168	23.5253	25.9455	22.1697	22.1449	22.1229
DNA-Genome-Picea-abies-GCA_900067695.1-2016-11-09.one_line	11960690255	150	2	CG_12	1036950	17.1823	16.4827	17.2489	19.4717	16.0542	16.2658	16.0517
DNA-Genome-Picea-abies-GCA_900067695.1-2016-11-09.one_line	11960690255	150	2	GC_12	880800	17.6814	17.0345	17.7632	19.4186	16.5093	16.6968	16.4914
DNA-Genome-Picea-abies-GCA_900067695.1-2016-11-09.one_line	11960690255	150	2	TA_13	166650	22.3108	22.3396	22.7867	25.0225	22.5125	22.2652	22.3366
DNA-Genome-Picea-abies-GCA_900067695.1-2016-11-09.one_line	11960690255	150	2	AC_13	159900	22.2695	22.1132	22.738	24.8893	22.3996	22.2683	22.2714
DNA-Genome-Picea-abies-GCA_900067695.1-2016-11-09.one_line	11960690255	150	2	AT_11	3600	10.2778	10.1389	11.4444	12.8611	15.4722	12.5556	13.5556
DNA-Genome-Picea-abies-GCA_900067695.1-2016-11-09.one_line	11960690255	150	2	CA_13	1800	27.3333	27.1667	29.2222	31.1111	39.5	33.8889	35.5556
DNA-Genome-Picea-abies-GCA_900067695.1-2016-11-09.one_line	11960690255	150	2	GA_13	1500	27.7333	27.1333	29.3333	30.8667	41.4667	34.5333	36.8
DNA-Genome-Picea-abies-GCA_900067695.1-2016-11-09.one_line	11960690255	150	2	CT_11	450	16.8889	14.6667	22.6667	20.2222	43.5556	20.8889	27.5556
DNA-Genome-Picea-abies-GCA_900067695.1-2016-11-09.one_line	11960690255	150	2	AG_11	450	18.2222	16.8889	24	21.7778	46.4444	23.3333	31.1111
DNA-Genome-Picea-abies-GCA_900067695.1-2016-11-09.one_line	11960690255	150	2	AC_11	300	14.6667	7	23.3333	16.3333	56	17	28
DNA-Genome-Picea-abies-GCA_900067695.1-2016-11-09.one_line	11960690255	150	2	TG_11	150	27.3333	10	42.6667	29.3333	105.333	30	50.6667
DNA-Genome-Picea-abies-GCA_900067695.1-2016-11-09.one_line	11960690255	250	2	AC_22	7226831255	23.7638	20.6378	23.6378	26.9588	17.6869	20.5225	20.5539
DNA-Genome-Picea-abies-GCA_900067695.1-2016-11-09.one_line	11960690255	250	2	TA_12	2075829750	22.793	21.5356	22.9087	26.3563	19.057	21.3729	21.3697
DNA-Genome-Picea-abies-GCA_900067695.1-2016-11-09.one_line	11960690255	250	2	AT_12	2018374750	22.8003	21.5631	22.9223	26.3539	19.0727	21.3929	21.391
DNA-Genome-Picea-abies-GCA_900067695.1-2016-11-09.one_line	11960690255	250	2	TC_12	212011250	20.8704	18.2562	20.5296	25.6272	15.9486	17.9532	17.867
DNA-Genome-Picea-abies-GCA_900067695.1-2016-11-09.one_line	11960690255	250	2	AG_12	189156500	20.9782	18.3989	20.6889	25.6417	16.0849	18.0286	17.9504
DNA-Genome-Picea-abies-GCA_900067695.1-2016-11-09.one_line	11960690255	250	2	AC_12	88109000	20.4026	17.9459	20.1113	25.2642	16.0574	17.9577	17.7905
DNA-Genome-Picea-abies-GCA_900067695.1-2016-11-09.one_line	11960690255	250	2	TG_12	75721250	20.4601	18.0116	20.0408	25.1973	16.2028	17.9603	17.7968
DNA-Genome-Picea-abies-GCA_900067695.1-2016-11-09.one_line	11960690255	250	2	CT_12	23394000	18.4873	17.5253	18.2176	23.3392	16.7549	17.4129	17.2014
DNA-Genome-Picea-abies-GCA_900067695.1-2016-11-09.one_line	11960690255	250	2	AT_22	21559250	22.7372	20.9254	22.4471	26.6485	20.0588	20.469	20.3955
DNA-Genome-Picea-abies-GCA_900067695.1-2016-11-09.one_line	11960690255	250	2	GA_12	16555000	19.0458	18.3531	19.2496	24.004	17.5851	17.9132	17.7788
DNA-Genome-Picea-abies-GCA_900067695.1-2016-11-09.one_line	11960690255	250	2	CA_12	6406750	17.0114	15.6069	17.0978	21.8099	14.9865	15.351	14.9824
DNA-Genome-Picea-abies-GCA_900067695.1-2016-11-09.one_line	11960690255	250	2	GT_12	4643000	17.8283	16.2331	17.907	22.184	15.5083	15.8071	15.5058
DNA-Genome-Picea-abies-GCA_900067695.1-2016-11-09.one_line	11960690255	250	2	CT_22	1453500	23.2843	22.5372	23.4784	25.868	21.8248	21.8091	21.7827
DNA-Genome-Picea-abies-GCA_900067695.1-2016-11-09.one_line	11960690255	250	2	CG_12	275000	18.4153	16.7055	18.5353	20.1091	16.3945	16.5327	16.368
DNA-Genome-Picea-abies-GCA_900067695.1-2016-11-09.one_line	11960690255	250	2	GC_12	222000	18.8545	17.0577	18.9306	20.5171	16.7036	16.7757	16.6613
DNA-Genome-Picea-abies-GCA_900067695.1-2016-11-09.one_line	11960690255	250	2	TA_13	75750	22.6455	22.5399	23.1947	25.237	23.0191	22.8884	22.8964
DNA-Genome-Picea-abies-GCA_900067695.1-2016-11-09.one_line	11960690255	250	2	AC_13	71750	22.7875	22.7624	23.3951	25.5805	23.6544	23.3226	23.4815
DNA-Genome-Picea-abies-GCA_900067695.1-2016-11-09.one_line	11960690255	250	2	AT_11	250	23.6	14.8	32	25.2	66.4	24.8	38.4
DNA-Genome-Picea-abies-GCA_900067695.1-2016-11-09.one_line	11960690255	250	2	CA_13	250	46	34	55.2	48.8	100.4	58.8	72
DNA-Genome-Picea-abies-GCA_900067695.1-2016-11-09.one_line	11960690255	500	2	AC_22	7903566755	23.7361	20.4655	23.6254	26.9413	17.5014	20.4303	20.4628
DNA-Genome-Picea-abies-GCA_900067695.1-2016-11-09.one_line	11960690255	500	2	TA_12	1875805000	22.9203	21.5928	23.0444	26.42	19.0042	21.351	21.3514
DNA-Genome-Picea-abies-GCA_900067695.1-2016-11-09.one_line	11960690255	500	2	AT_12	1834903500	22.9346	21.6285	23.0641	26.4163	19.0338	21.3729	21.3723
DNA-Genome-Picea-abies-GCA_900067695.1-2016-11-09.one_line	11960690255	500	2	TC_12	116086500	20.4033	17.5134	20.0668	25.3789	15.361	17.0789	16.9709
DNA-Genome-Picea-abies-GCA_900067695.1-2016-11-09.one_line	11960690255	500	2	AG_12	103462000	20.4947	17.5986	20.1203	25.3991	15.4537	17.0896	16.9924
DNA-Genome-Picea-abies-GCA_900067695.1-2016-11-09.one_line	11960690255	500	2	AT_22	43893500	22.8831	20.4612	22.6993	26.7416	19.0043	20.081	20.0052
DNA-Genome-Picea-abies-GCA_900067695.1-2016-11-09.one_line	11960690255	500	2	AC_12	32563000	19.778	17.3531	19.5984	24.8249	16.1843	17.1959	17.0017
DNA-Genome-Picea-abies-GCA_900067695.1-2016-11-09.one_line	11960690255	500	2	TG_12	28862500	19.9431	17.498	19.5087	24.7812	16.3556	17.2367	17.0484
DNA-Genome-Picea-abies-GCA_900067695.1-2016-11-09.one_line	11960690255	500	2	CT_12	10842000	18.32	18.4981	18.5614	22.6392	17.8694	18.0551	17.8856
DNA-Genome-Picea-abies-GCA_900067695.1-2016-11-09.one_line	11960690255	500	2	GA_12	7123000	19.1512	19.4367	19.4136	23.1862	18.6229	18.6996	18.6128
DNA-Genome-Picea-abies-GCA_900067695.1-2016-11-09.one_line	11960690255	500	2	CT_22	1529000	23.1165	22.0729	23.2866	25.6878	21.0126	21.0225	20.9787
DNA-Genome-Picea-abies-GCA_900067695.1-2016-11-09.one_line	11960690255	500	2	CA_12	1128000	17.7142	15.4224	17.7759	20.0294	14.8639	15.1253	14.8582
DNA-Genome-Picea-abies-GCA_900067695.1-2016-11-09.one_line	11960690255	500	2	GT_12	821500	18.5999	16.0512	18.6588	20.2273	15.3721	15.5449	15.3495
DNA-Genome-Picea-abies-GCA_900067695.1-2016-11-09.one_line	11960690255	500	2	GC_12	46000	18.2457	15.0913	18.2391	19.6674	16.0174	15.6109	15.8087
DNA-Genome-Picea-abies-GCA_900067695.1-2016-11-09.one_line	11960690255	500	2	CG_12	35500	18.5155	15.2873	18.4958	19.9549	16.1887	15.9296	16.0113
DNA-Genome-Picea-abies-GCA_900067695.1-2016-11-09.one_line	11960690255	500	2	AC_13	12000	24.0833	25.775	25.1667	27.325	28.4333	27.5	27.8
DNA-Genome-Picea-abies-GCA_900067695.1-2016-11-09.one_line	11960690255	500	2	TA_13	10500	24.1429	25.9048	25.1238	27.3714	28.9619	28.2476	28.1524
DNA-Genome-Picea-abies-GCA_900067695.1-2016-11-09.one_line	11960690255	750	2	AC_22	8304521255	23.7219	20.4235	23.6231	26.9301	17.4861	20.4459	20.4786
DNA-Genome-Picea-abies-GCA_900067695.1-2016-11-09.one_line	11960690255	750	2	TA_12	1718976000	22.9926	21.7297	23.1288	26.4512	19.0919	21.4104	21.4062
DNA-Genome-Picea-abies-GCA_900067695.1-2016-11-09.one_line	11960690255	750	2	AT_12	1683672000	23.0088	21.7668	23.154	26.445	19.1279	21.453	21.4482
DNA-Genome-Picea-abies-GCA_900067695.1-2016-11-09.one_line	11960690255	750	2	TC_12	76148250	20.305	17.2851	19.9008	25.2814	15.3577	16.7871	16.695
DNA-Genome-Picea-abies-GCA_900067695.1-2016-11-09.one_line	11960690255	750	2	AG_12	68621250	20.2921	17.3293	20.0112	25.2909	15.3925	16.7342	16.6392
DNA-Genome-Picea-abies-GCA_900067695.1-2016-11-09.one_line	11960690255	750	2	AT_22	66072750	22.9744	20.367	22.8519	26.7814	18.46	20.0087	19.9691
DNA-Genome-Picea-abies-GCA_900067695.1-2016-11-09.one_line	11960690255	750	2	AC_12	16645500	19.1501	17.1119	19.2383	24.4639	16.2538	16.719	16.5112
DNA-Genome-Picea-abies-GCA_900067695.1-2016-11-09.one_line	11960690255	750	2	TG_12	15018000	19.3035	17.275	19.3616	24.4187	16.3666	16.7598	16.5449
DNA-Genome-Picea-abies-GCA_900067695.1-2016-11-09.one_line	11960690255	750	2	CT_12	5703750	17.909	18.5719	18.1785	21.7739	18.2148	18.3515	18.2196
DNA-Genome-Picea-abies-GCA_900067695.1-2016-11-09.one_line	11960690255	750	2	GA_12	3517500	18.4815	19.3723	18.7712	22.0195	18.8672	18.924	18.8659
DNA-Genome-Picea-abies-GCA_900067695.1-2016-11-09.one_line	11960690255	750	2	CT_22	1398000	23.1162	21.8379	23.2549	25.6307	20.6725	20.676	20.671
DNA-Genome-Picea-abies-GCA_900067695.1-2016-11-09.one_line	11960690255	750	2	CA_12	219000	20.1913	17.753	20.3233	22.0584	17.3571	17.3836	17.3059
DNA-Genome-Picea-abies-GCA_900067695.1-2016-11-09.one_line	11960690255	750	2	GT_12	153000	21.4477	19.2915	21.6144	23.4948	18.8569	18.7739	18.7869
DNA-Genome-Picea-abies-GCA_900067695.1-2016-11-09.one_line	11960690255	750	2	GC_12	8250	17.9273	13.503	17.4061	19.2121	18.3394	16.8364	17.1152
DNA-Genome-Picea-abies-GCA_900067695.1-2016-11-09.one_line	11960690255	750	2	CG_12	7500	16.88	12.68	14.32	18.1467	16.12	14.6933	15.2
DNA-Genome-Picea-abies-GCA_900067695.1-2016-11-09.one_line	11960690255	750	2	AC_13	4500	25.2222	26.6889	26.5778	28.6444	32.1111	30.2444	30.5778
DNA-Genome-Picea-abies-GCA_900067695.1-2016-11-09.one_line	11960690255	750	2	TA_13	3750	25.4133	26.8	26.9333	28.8533	33.52	31.1733	31.5733
DNA-Genome-Picea-abies-GCA_900067695.1-2016-11-09.one_line	11960690255	1000	2	AC_22	8585111255	23.7153	20.4358	23.6266	26.922	17.5147	20.4766	20.5096
DNA-Genome-Picea-abies-GCA_900067695.1-2016-11-09.one_line	11960690255	1000	2	TA_12	1596727000	23.039	21.8293	23.1852	26.4709	19.1854	21.4834	21.4747
DNA-Genome-Picea-abies-GCA_900067695.1-2016-11-09.one_line	11960690255	1000	2	AT_12	1566539000	23.0559	21.8736	23.2095	26.4642	19.2219	21.5064	21.5119
DNA-Genome-Picea-abies-GCA_900067695.1-2016-11-09.one_line	11960690255	1000	2	AT_22	87061000	23.1219	20.3642	22.9549	26.8077	18.1423	20.0104	19.9621
DNA-Genome-Picea-abies-GCA_900067695.1-2016-11-09.one_line	11960690255	1000	2	TC_12	53061000	20.1773	17.2839	19.7743	25.1698	15.5892	16.6868	16.6073
DNA-Genome-Picea-abies-GCA_900067695.1-2016-11-09.one_line	11960690255	1000	2	AG_12	48321000	20.2128	17.2819	19.8583	25.1896	15.6149	16.6235	16.5471
DNA-Genome-Picea-abies-GCA_900067695.1-2016-11-09.one_line	11960690255	1000	2	AC_12	8765000	19.6249	17.5958	19.7218	24.2253	16.7665	16.9415	16.7587
DNA-Genome-Picea-abies-GCA_900067695.1-2016-11-09.one_line	11960690255	1000	2	TG_12	7987000	19.7466	17.7355	19.8118	24.1617	16.8519	17.0339	16.8634
DNA-Genome-Picea-abies-GCA_900067695.1-2016-11-09.one_line	11960690255	1000	2	CT_12	3499000	17.4731	18.1412	17.7331	21.1133	18.0537	18.1724	18.029
DNA-Genome-Picea-abies-GCA_900067695.1-2016-11-09.one_line	11960690255	1000	2	GA_12	2125000	17.8308	18.7256	18.1226	21.2787	18.4075	18.4708	18.3842
DNA-Genome-Picea-abies-GCA_900067695.1-2016-11-09.one_line	11960690255	1000	2	CT_22	1341000	22.9549	21.3051	23.0646	25.4486	20.0986	20.072	20.1098
DNA-Genome-Picea-abies-GCA_900067695.1-2016-11-09.one_line	11960690255	1000	2	CA_12	90000	19.0933	16.1122	19.2667	20.8833	16.7544	16.6511	16.6622
DNA-Genome-Picea-abies-GCA_900067695.1-2016-11-09.one_line	11960690255	1000	2	GT_12	52000	21.4288	19.2827	21.7038	23.8135	20.3096	19.8538	20.1462
DNA-Genome-Picea-abies-GCA_900067695.1-2016-11-09.one_line	11960690255	1000	2	GC_12	6000	13.95	11.3	14.3	15.1667	15.55	13.4167	13.8667
DNA-Genome-Picea-abies-GCA_900067695.1-2016-11-09.one_line	11960690255	1000	2	CG_12	2000	18.8	15.45	18.9	20	25.5	19.9	21.6
DNA-Genome-Picea-abies-GCA_900067695.1-2016-11-09.one_line	11960690255	1000	2	TA_13	2000	26.85	27	28.6	30.35	38.5	33.55	35
DNA-Genome-Picea-abies-GCA_900067695.1-2016-11-09.one_line	11960690255	1000	2	AC_13	1000	29.9	27	32.4	33.3	48.3	37.4	40.8
DNA-Genome-Picea-abies-GCA_900067695.1-2016-11-09.one_line	11960690255	2500	2	AC_22	9427080255	23.7011	20.5204	23.643	26.9002	17.6575	20.6295	20.6625
DNA-Genome-Picea-abies-GCA_900067695.1-2016-11-09.one_line	11960690255	2500	2	TA_12	1165067500	23.1814	22.3007	23.372	26.5221	19.6336	21.7877	21.7997
DNA-Genome-Picea-abies-GCA_900067695.1-2016-11-09.one_line	11960690255	2500	2	AT_12	1145690000	23.1948	22.3253	23.3884	26.5112	19.674	21.8231	21.8405
DNA-Genome-Picea-abies-GCA_900067695.1-2016-11-09.one_line	11960690255	2500	2	AT_22	201090000	23.3832	20.6629	23.2699	26.854	17.8014	20.2414	20.242
DNA-Genome-Picea-abies-GCA_900067695.1-2016-11-09.one_line	11960690255	2500	2	TC_12	10037500	20.5724	18.4428	20.6948	24.9455	17.2219	17.2256	17.2343
DNA-Genome-Picea-abies-GCA_900067695.1-2016-11-09.one_line	11960690255	2500	2	AG_12	9230000	20.5755	18.4184	20.7059	24.8925	17.1473	17.1238	17.1418
DNA-Genome-Picea-abies-GCA_900067695.1-2016-11-09.one_line	11960690255	2500	2	CT_22	872500	22.0496	19.9932	22.1841	24.1199	18.7166	18.6717	18.648
DNA-Genome-Picea-abies-GCA_900067695.1-2016-11-09.one_line	11960690255	2500	2	CT_12	582500	17.3409	18.0081	17.667	20.1004	17.9821	17.9739	17.955
DNA-Genome-Picea-abies-GCA_900067695.1-2016-11-09.one_line	11960690255	2500	2	GA_12	462500	18.2899	18.9604	18.6621	21.0562	18.8746	18.8097	18.848
DNA-Genome-Picea-abies-GCA_900067695.1-2016-11-09.one_line	11960690255	2500	2	AC_12	305000	20.4718	20.0731	20.7849	22.9161	19.779	19.7672	19.7574
DNA-Genome-Picea-abies-GCA_900067695.1-2016-11-09.one_line	11960690255	2500	2	TG_12	265000	20.1611	19.4132	20.4626	22.5291	19.1974	19.1487	19.1004
DNA-Genome-Picea-abies-GCA_900067695.1-2016-11-09.one_line	11960690255	2500	2	GT_12	7500	19.9733	21.6267	20.7733	22.8533	24.4667	23.08	23.52
DNA-Genome-Picea-abies-GCA_900067695.1-2016-11-09.one_line	11960690255	5000	2	AC_22	9971930255	23.6946	20.6005	23.661	26.8857	17.819	20.767	20.8
DNA-Genome-Picea-abies-GCA_900067695.1-2016-11-09.one_line	11960690255	5000	2	TA_12	815730000	23.2631	22.6012	23.4784	26.5467	19.9874	22.0318	22.057
DNA-Genome-Picea-abies-GCA_900067695.1-2016-11-09.one_line	11960690255	5000	2	AT_12	806400000	23.2703	22.6148	23.4872	26.5349	20.0124	22.0658	22.0819
DNA-Genome-Picea-abies-GCA_900067695.1-2016-11-09.one_line	11960690255	5000	2	AT_22	362770000	23.5567	21.0364	23.4837	26.8649	17.9416	20.554	20.5741
DNA-Genome-Picea-abies-GCA_900067695.1-2016-11-09.one_line	11960690255	5000	2	TC_12	1695000	21.1598	19.5431	21.36	24.207	18.5973	18.5598	18.5638
DNA-Genome-Picea-abies-GCA_900067695.1-2016-11-09.one_line	11960690255	5000	2	AG_12	1520000	21.2903	19.9686	21.4564	24.2353	18.8276	18.7681	18.7942
DNA-Genome-Picea-abies-GCA_900067695.1-2016-11-09.one_line	11960690255	5000	2	CT_22	405000	21.2642	19.14	21.4222	23.2296	18.3277	18.2948	18.2667
DNA-Genome-Picea-abies-GCA_900067695.1-2016-11-09.one_line	11960690255	5000	2	CT_12	100000	14.791	15.317	15.178	17.425	15.808	15.465	15.636
DNA-Genome-Picea-abies-GCA_900067695.1-2016-11-09.one_line	11960690255	5000	2	GA_12	55000	18.2073	18.8	18.6691	20.8873	19.6327	19.2127	19.4036
DNA-Genome-Picea-abies-GCA_900067695.1-2016-11-09.one_line	11960690255	5000	2	AC_12	45000	20.0178	18.6311	20.3111	22.48	20.44	20.0622	20.1778
DNA-Genome-Picea-abies-GCA_900067695.1-2016-11-09.one_line	11960690255	5000	2	TG_12	40000	20.895	21.1125	21.38	23.5	21.965	21.5375	21.78
DNA-Genome-Picea-abies-GCA_900067695.1-2016-11-09.one_line	11960690255	10000	2	AC_22	10364090255	23.6873	20.725	23.6732	26.8718	17.9706	20.8828	20.9154
DNA-Genome-Picea-abies-GCA_900067695.1-2016-11-09.one_line	11960690255	10000	2	AT_22	645400000	23.6426	21.3431	23.6337	26.8461	18.1559	20.8287	20.8592
DNA-Genome-Picea-abies-GCA_900067695.1-2016-11-09.one_line	11960690255	10000	2	TA_12	478040000	23.3402	22.8779	23.5791	26.5656	20.3073	22.2543	22.2673
DNA-Genome-Picea-abies-GCA_900067695.1-2016-11-09.one_line	11960690255	10000	2	AT_12	472680000	23.346	22.851	23.5798	26.5542	20.3199	22.2439	22.2709
DNA-Genome-Picea-abies-GCA_900067695.1-2016-11-09.one_line	11960690255	10000	2	TC_12	220000	19.6259	18.4941	19.87	21.9441	18.505	18.4123	18.46
DNA-Genome-Picea-abies-GCA_900067695.1-2016-11-09.one_line	11960690255	10000	2	AG_12	180000	18.62	18.0983	18.8656	21.0422	17.8394	17.6428	17.7867
DNA-Genome-Picea-abies-GCA_900067695.1-2016-11-09.one_line	11960690255	10000	2	CT_22	80000	22.7238	23.0175	23.0425	24.995	23.44	23.4225	23.35
DNA-Genome-Picea-abies-GCA_900067695.1-2016-11-09.one_line	11960690255	25	3	ACT_222	4143242955	24.0786	24.2717	24.0655	26.9383	21.9731	23.723	23.7615
DNA-Genome-Picea-abies-GCA_900067695.1-2016-11-09.one_line	11960690255	25	3	TAC_123	2058647400	22.3926	23.2311	22.781	26.0158	22.1833	23.2359	23.2594
DNA-Genome-Picea-abies-GCA_900067695.1-2016-11-09.one_line	11960690255	25	3	ATC_123	1686188425	22.3313	23.2445	22.7314	25.9753	22.2878	23.2736	23.2934
DNA-Genome-Picea-abies-GCA_900067695.1-2016-11-09.one_line	11960690255	25	3	TCA_123	753442775	22.0188	22.7079	22.2841	25.9101	21.5286	22.7152	22.7581
DNA-Genome-Picea-abies-GCA_900067695.1-2016-11-09.one_line	11960690255	25	3	ACT_123	731807775	22.1091	22.954	22.3919	25.9357	21.8837	22.959	23.0073
DNA-Genome-Picea-abies-GCA_900067695.1-2016-11-09.one_line	11960690255	25	3	AGC_123	613346900	21.9798	22.7031	22.287	25.8081	21.667	22.7774	22.8212
DNA-Genome-Picea-abies-GCA_900067695.1-2016-11-09.one_line	11960690255	25	3	TGA_123	514222650	21.9778	22.8668	22.2501	25.7777	21.8526	22.8814	22.9216
DNA-Genome-Picea-abies-GCA_900067695.1-2016-11-09.one_line	11960690255	25	3	GAC_123	270113625	21.8373	22.5984	22.0318	25.7955	21.3982	22.514	22.5753
DNA-Genome-Picea-abies-GCA_900067695.1-2016-11-09.one_line	11960690255	25	3	CAT_123	238108325	21.7624	22.4692	21.8991	25.7935	21.3406	22.4197	22.4845
DNA-Genome-Picea-abies-GCA_900067695.1-2016-11-09.one_line	11960690255	25	3	CTA_123	221658100	21.636	22.3634	21.7873	25.6942	21.2316	22.3307	22.401
DNA-Genome-Picea-abies-GCA_900067695.1-2016-11-09.one_line	11960690255	25	3	GTA_123	188760425	21.7746	22.5995	21.9412	25.7816	21.489	22.488	22.551
DNA-Genome-Picea-abies-GCA_900067695.1-2016-11-09.one_line	11960690255	25	3	ACT_122	106206725	18.1819	18.3802	18.3734	21.8796	18.7782	19.2378	19.2307
DNA-Genome-Picea-abies-GCA_900067695.1-2016-11-09.one_line	11960690255	25	3	ATG_122	103944250	18.2725	18.4623	18.4548	21.9414	18.9088	19.3236	19.3307
DNA-Genome-Picea-abies-GCA_900067695.1-2016-11-09.one_line	11960690255	25	3	TAC_122	92134600	18.1267	18.3115	18.324	21.8163	18.7895	19.1897	19.1929
DNA-Genome-Picea-abies-GCA_900067695.1-2016-11-09.one_line	11960690255	25	3	TAG_122	91404925	18.1134	18.299	18.3256	21.8074	18.7671	19.1816	19.1805
DNA-Genome-Picea-abies-GCA_900067695.1-2016-11-09.one_line	11960690255	25	3	CAT_122	35170300	17.878	18.1608	17.9508	21.7573	18.5314	18.7642	18.7757
DNA-Genome-Picea-abies-GCA_900067695.1-2016-11-09.one_line	11960690255	25	3	GAT_122	26256000	17.9266	18.1831	17.8945	21.7282	18.6751	18.8249	18.8468
DNA-Genome-Picea-abies-GCA_900067695.1-2016-11-09.one_line	11960690255	25	3	GCA_123	26040800	20.5565	21.3586	20.3508	24.8461	20.8689	21.0913	21.1727
DNA-Genome-Picea-abies-GCA_900067695.1-2016-11-09.one_line	11960690255	25	3	CGA_123	21752800	20.4228	21.2228	20.2651	24.7029	20.8013	20.9423	21.024
DNA-Genome-Picea-abies-GCA_900067695.1-2016-11-09.one_line	11960690255	25	3	AT_11	12350250	9.5587	10.422	9.6548	12.5393	10.9814	11.5833	10.9855
DNA-Genome-Picea-abies-GCA_900067695.1-2016-11-09.one_line	11960690255	25	3	ACG_122	6726225	16.5182	17.1444	16.7981	20.4138	17.695	17.6619	17.6952
DNA-Genome-Picea-abies-GCA_900067695.1-2016-11-09.one_line	11960690255	25	3	TCG_122	6614850	16.4969	17.122	16.7889	20.449	17.6629	17.6177	17.6614
DNA-Genome-Picea-abies-GCA_900067695.1-2016-11-09.one_line	11960690255	25	3	CTG_122	1451050	16.4801	17.4979	16.765	19.817	17.7731	17.7269	17.775
DNA-Genome-Picea-abies-GCA_900067695.1-2016-11-09.one_line	11960690255	25	3	CT_11	1254975	8.2009	9.6649	8.3273	10.6156	9.8116	10.4436	9.8316
DNA-Genome-Picea-abies-GCA_900067695.1-2016-11-09.one_line	11960690255	25	3	ATG_222	1108925	25.0874	27.2403	25.7612	28.5392	27.2984	27.3156	27.2917
DNA-Genome-Picea-abies-GCA_900067695.1-2016-11-09.one_line	11960690255	25	3	AG_11	1048650	8.2539	9.6975	8.387	10.6405	9.8986	10.5016	9.9362
DNA-Genome-Picea-abies-GCA_900067695.1-2016-11-09.one_line	11960690255	25	3	GAC_122	923675	16.6648	17.5605	16.9705	19.7096	17.9968	17.9842	17.9812
DNA-Genome-Picea-abies-GCA_900067695.1-2016-11-09.one_line	11960690255	25	3	ATN_222	850025	21.4737	25.4268	22.1408	25.0954	24.4132	24.4399	24.4087
DNA-Genome-Picea-abies-GCA_900067695.1-2016-11-09.one_line	11960690255	25	3	CAG_122	535925	16.2724	16.8496	16.5045	18.9088	17.5515	17.5101	17.5196
DNA-Genome-Picea-abies-GCA_900067695.1-2016-11-09.one_line	11960690255	25	3	GCT_122	473975	16.2994	16.8794	16.5481	18.9508	17.6073	17.5613	17.5992
DNA-Genome-Picea-abies-GCA_900067695.1-2016-11-09.one_line	11960690255	25	3	CTN_222	376025	21.3297	25.2547	22.0858	24.9191	24.6204	24.6034	24.6016
DNA-Genome-Picea-abies-GCA_900067695.1-2016-11-09.one_line	11960690255	25	3	AC_11	364875	4.5215	5.8124	4.6536	5.9977	6.4099	6.8933	6.3847
DNA-Genome-Picea-abies-GCA_900067695.1-2016-11-09.one_line	11960690255	25	3	AGN_222	361825	21.3548	25.3233	22.0996	24.8678	24.6102	24.592	24.582
DNA-Genome-Picea-abies-GCA_900067695.1-2016-11-09.one_line	11960690255	25	3	TG_11	356475	4.5829	5.8517	4.7195	6.0843	6.507	6.934	6.4756
DNA-Genome-Picea-abies-GCA_900067695.1-2016-11-09.one_line	11960690255	25	3	CTG_222	346900	25.646	27.5982	26.4301	28.8547	28.1574	28.1885	28.1026
DNA-Genome-Picea-abies-GCA_900067695.1-2016-11-09.one_line	11960690255	25	3	TGN_222	337850	21.2793	25.2079	22.0465	24.7811	24.5961	24.6086	24.573
DNA-Genome-Picea-abies-GCA_900067695.1-2016-11-09.one_line	11960690255	25	3	ACG_222	293825	25.6809	27.5729	26.4647	28.9016	28.148	28.2699	28.1419
DNA-Genome-Picea-abies-GCA_900067695.1-2016-11-09.one_line	11960690255	25	3	ACN_222	279575	21.5005	25.5473	22.3067	25.1725	24.7873	24.7737	24.7533
DNA-Genome-Picea-abies-GCA_900067695.1-2016-11-09.one_line	11960690255	25	3	ATG_123	204400	23.7613	24.8562	24.7025	27.7813	26.706	26.658	26.6536
DNA-Genome-Picea-abies-GCA_900067695.1-2016-11-09.one_line	11960690255	25	3	TAG_123	196275	23.543	24.7041	24.5227	27.7172	26.5587	26.5831	26.5179
DNA-Genome-Picea-abies-GCA_900067695.1-2016-11-09.one_line	11960690255	25	3	ACT_133	183000	23.224	25.9978	24.0929	27.1814	26.1344	26.1869	26.1071
DNA-Genome-Picea-abies-GCA_900067695.1-2016-11-09.one_line	11960690255	25	3	TAC_133	181550	23.1226	25.9521	23.9857	27.1688	26.0463	26.0193	25.9719
DNA-Genome-Picea-abies-GCA_900067695.1-2016-11-09.one_line	11960690255	25	3	AGT_123	99900	23.7217	24.8959	24.7888	27.8348	27.1001	27.036	27.027
DNA-Genome-Picea-abies-GCA_900067695.1-2016-11-09.one_line	11960690255	25	3	CGN_222	79425	21.628	25.7891	22.4992	24.9632	25.8735	25.8319	25.8004
DNA-Genome-Picea-abies-GCA_900067695.1-2016-11-09.one_line	11960690255	25	3	ATN_123	78675	21.5545	24.8719	22.6298	26.0947	24.938	24.8249	24.816
DNA-Genome-Picea-abies-GCA_900067695.1-2016-11-09.one_line	11960690255	25	3	TAN_123	71250	21.4779	24.9782	22.5937	26.0674	24.9067	24.8351	24.7804
DNA-Genome-Picea-abies-GCA_900067695.1-2016-11-09.one_line	11960690255	25	3	TNA_123	64775	17.9622	21.7074	18.9301	21.7707	22.0425	21.939	21.9406
DNA-Genome-Picea-abies-GCA_900067695.1-2016-11-09.one_line	11960690255	25	3	ANT_123	58575	18.2143	22.3116	19.2164	22.006	22.3918	22.2621	22.3508
DNA-Genome-Picea-abies-GCA_900067695.1-2016-11-09.one_line	11960690255	25	3	NTA_123	52275	16.6332	19.9598	17.5342	19.5313	21.2721	21.1286	21.142
DNA-Genome-Picea-abies-GCA_900067695.1-2016-11-09.one_line	11960690255	25	3	NAT_123	51150	16.7507	19.9179	17.6579	19.566	21.6403	21.3118	21.4506
DNA-Genome-Picea-abies-GCA_900067695.1-2016-11-09.one_line	11960690255	25	3	NAC_133	51100	17.865	21.5871	18.544	19.7084	22.8219	22.4755	22.6771
DNA-Genome-Picea-abies-GCA_900067695.1-2016-11-09.one_line	11960690255	25	3	TCG_123	50800	24.0433	25.0315	25.2638	28.1398	27.9803	27.8524	27.8189
DNA-Genome-Picea-abies-GCA_900067695.1-2016-11-09.one_line	11960690255	25	3	GAT_123	48150	23.6012	24.9387	24.7601	27.8567	27.568	27.4164	27.4393
DNA-Genome-Picea-abies-GCA_900067695.1-2016-11-09.one_line	11960690255	25	3	ACG_123	41400	24.2271	25.1932	25.4058	28.2053	28.2826	28.0894	28.058
DNA-Genome-Picea-abies-GCA_900067695.1-2016-11-09.one_line	11960690255	25	3	ANC_123	36800	17.9592	21.5	19.0163	21.9158	22.413	22.163	22.25
DNA-Genome-Picea-abies-GCA_900067695.1-2016-11-09.one_line	11960690255	25	3	ATN_122	36175	7.3531	9.3766	7.718	9.8521	11.9724	10.1949	9.4762
DNA-Genome-Picea-abies-GCA_900067695.1-2016-11-09.one_line	11960690255	25	3	TGC_123	35900	24.2813	25.234	25.6045	28.4568	28.5515	28.3426	28.39
DNA-Genome-Picea-abies-GCA_900067695.1-2016-11-09.one_line	11960690255	25	3	TNC_123	34425	18.3588	22.9601	19.5033	22.3646	22.9978	22.8322	22.7974
DNA-Genome-Picea-abies-GCA_900067695.1-2016-11-09.one_line	11960690255	25	3	ANG_123	33650	18.5498	22.6657	19.679	22.4101	23.2303	23.0163	23.049
DNA-Genome-Picea-abies-GCA_900067695.1-2016-11-09.one_line	11960690255	25	3	NAC_123	29825	16.6706	19.8659	17.6697	19.4568	21.8374	21.4786	21.606
DNA-Genome-Picea-abies-GCA_900067695.1-2016-11-09.one_line	11960690255	25	3	TNG_123	28875	18.6736	22.4	19.8511	22.6632	23.5325	23.2277	23.2727
DNA-Genome-Picea-abies-GCA_900067695.1-2016-11-09.one_line	11960690255	25	3	AGN_123	26625	21.615	25.0629	23.031	26.231	26.1258	25.7427	25.8103
DNA-Genome-Picea-abies-GCA_900067695.1-2016-11-09.one_line	11960690255	25	3	TCN_123	26350	21.5863	25.1651	22.945	26.1822	26.0152	25.5446	25.7457
DNA-Genome-Picea-abies-GCA_900067695.1-2016-11-09.one_line	11960690255	25	3	NAG_123	25700	17.1167	20.537	18.2101	19.9416	22.5798	22.2257	22.3191
DNA-Genome-Picea-abies-GCA_900067695.1-2016-11-09.one_line	11960690255	25	3	NTC_123	25225	17.0942	20.3964	18.1487	19.9286	22.4856	22.1407	22.2002
DNA-Genome-Picea-abies-GCA_900067695.1-2016-11-09.one_line	11960690255	25	3	NTG_123	22275	17.1852	20.5657	18.3075	20.009	22.963	22.4242	22.6442
DNA-Genome-Picea-abies-GCA_900067695.1-2016-11-09.one_line	11960690255	25	3	ACN_123	20675	21.6832	25.0979	23.081	25.9927	26.162	25.7993	25.8283
DNA-Genome-Picea-abies-GCA_900067695.1-2016-11-09.one_line	11960690255	25	3	TGN_123	20075	21.7484	25.4097	23.213	25.9577	26.4857	26.0025	26.1021
DNA-Genome-Picea-abies-GCA_900067695.1-2016-11-09.one_line	11960690255	25	3	TAN_122	19375	8.449	10.9832	8.96	11.1071	13.5381	11.6439	11.4787
DNA-Genome-Picea-abies-GCA_900067695.1-2016-11-09.one_line	11960690255	25	3	CAT_133	18500	23.3568	26.0649	24.6595	27.2811	28.5676	28.0919	28.1946
DNA-Genome-Picea-abies-GCA_900067695.1-2016-11-09.one_line	11960690255	25	3	GAC_133	18350	23.1553	25.7384	24.4469	27.1172	28.2016	27.6458	27.8365
DNA-Genome-Picea-abies-GCA_900067695.1-2016-11-09.one_line	11960690255	25	3	CTG_123	18250	24.5973	25.463	26.0493	28.674	29.863	29.326	29.4795
DNA-Genome-Picea-abies-GCA_900067695.1-2016-11-09.one_line	11960690255	25	3	NCA_123	11700	17.1368	20.2991	18.4615	20.094	23.7179	22.906	23.1111
DNA-Genome-Picea-abies-GCA_900067695.1-2016-11-09.one_line	11960690255	25	3	CAG_123	11650	24.6266	25.1502	26.2489	28.5408	30.2833	29.6223	29.6652
DNA-Genome-Picea-abies-GCA_900067695.1-2016-11-09.one_line	11960690255	25	3	NGA_123	11300	17.1327	20.3894	18.4071	20.0354	23.8761	23.0708	23.2566
DNA-Genome-Picea-abies-GCA_900067695.1-2016-11-09.one_line	11960690255	25	3	GTC_123	10575	24.747	25.3901	26.3641	28.7943	30.9125	30.1466	30.26
DNA-Genome-Picea-abies-GCA_900067695.1-2016-11-09.one_line	11960690255	25	3	GNA_123	10225	17.0856	20.8606	18.4841	20.7433	23.4914	22.5232	22.8068
DNA-Genome-Picea-abies-GCA_900067695.1-2016-11-09.one_line	11960690255	25	3	CTN_123	10100	22.396	25.495	24.1188	27.1386	28.4158	27.5644	27.7228
DNA-Genome-Picea-abies-GCA_900067695.1-2016-11-09.one_line	11960690255	25	3	CNA_123	9250	16.973	20.0757	18.3135	20.227	23.373	22.3027	22.6162
DNA-Genome-Picea-abies-GCA_900067695.1-2016-11-09.one_line	11960690255	25	3	NCT_123	8950	17.8101	21.0615	19.1732	20.3687	25.0503	24.067	24.2682
DNA-Genome-Picea-abies-GCA_900067695.1-2016-11-09.one_line	11960690255	25	3	GAN_123	8950	22.2346	25.3631	23.9777	26.9721	28.4693	27.5642	27.7095
DNA-Genome-Picea-abies-GCA_900067695.1-2016-11-09.one_line	11960690255	25	3	NGT_123	8600	18	21.3488	19.4419	20.8721	25.2907	24.3721	24.4651
DNA-Genome-Picea-abies-GCA_900067695.1-2016-11-09.one_line	11960690255	25	3	CTN_122	6700	9.3731	11.3881	10.2985	12.6567	15.4776	12.5224	12.8955
DNA-Genome-Picea-abies-GCA_900067695.1-2016-11-09.one_line	11960690255	25	3	CNT_123	6525	18.5747	22.023	20.0153	22.2222	25.6858	24.2452	24.5824
DNA-Genome-Picea-abies-GCA_900067695.1-2016-11-09.one_line	11960690255	25	3	GTN_123	5975	22.9121	25.9079	24.9372	27.7657	30.3933	28.8368	29.1883
DNA-Genome-Picea-abies-GCA_900067695.1-2016-11-09.one_line	11960690255	25	3	AGN_122	5600	9.3036	11.75	10.3929	12.7679	16.875	12.9464	13.3571
DNA-Genome-Picea-abies-GCA_900067695.1-2016-11-09.one_line	11960690255	25	3	CAN_123	5475	23.3425	26.0274	25.3516	27.9269	31.3607	29.589	30.1005
DNA-Genome-Picea-abies-GCA_900067695.1-2016-11-09.one_line	11960690255	25	3	NAT_122	5000	7.46	9.32	8.32	9.3	15.72	10.76	11.04
DNA-Genome-Picea-abies-GCA_900067695.1-2016-11-09.one_line	11960690255	25	3	GNT_123	4500	19.5778	22.6889	21.3778	23.3778	28.2889	26.0444	26.7556
DNA-Genome-Picea-abies-GCA_900067695.1-2016-11-09.one_line	11960690255	25	3	ACN_122	4425	10.0565	12.6328	11.3898	13.4689	18.8475	13.7175	14.2825
DNA-Genome-Picea-abies-GCA_900067695.1-2016-11-09.one_line	11960690255	25	3	TCN_122	4150	12.0482	14.988	13.3012	16.241	19.6627	16.1928	17.0602
DNA-Genome-Picea-abies-GCA_900067695.1-2016-11-09.one_line	11960690255	25	3	GCT_123	3925	26.1401	26.0637	28.2293	30.4459	35.9236	33.2229	34.1401
DNA-Genome-Picea-abies-GCA_900067695.1-2016-11-09.one_line	11960690255	25	3	GAN_122	3900	10.9744	13.7692	12.359	14.6923	17.8718	14.6667	15.6923
DNA-Genome-Picea-abies-GCA_900067695.1-2016-11-09.one_line	11960690255	25	3	TGN_122	3750	10.8	13.1733	12.0533	14.48	19.0133	14.72	15.5733
DNA-Genome-Picea-abies-GCA_900067695.1-2016-11-09.one_line	11960690255	25	3	GNC_123	2600	18.4231	21.1154	20.2308	21.6154	28.5769	24.6154	25.8462
DNA-Genome-Picea-abies-GCA_900067695.1-2016-11-09.one_line	11960690255	25	3	CAN_122	2475	11.7576	14.2222	13.5758	15.596	20.3232	15.798	17.2929
DNA-Genome-Picea-abies-GCA_900067695.1-2016-11-09.one_line	11960690255	25	3	TN_11	2475	6.2626	7.2727	7.7576	8.5253	17.4141	9.8586	10.6667
DNA-Genome-Picea-abies-GCA_900067695.1-2016-11-09.one_line	11960690255	25	3	NGC_123	2425	20.4536	23.3402	22.6804	23.5876	33.0722	28.7423	30.1856
DNA-Genome-Picea-abies-GCA_900067695.1-2016-11-09.one_line	11960690255	25	3	CGT_123	2375	28.0421	26.4	30.5684	32.4632	41.0526	36.6316	38.0632
DNA-Genome-Picea-abies-GCA_900067695.1-2016-11-09.one_line	11960690255	25	3	NCG_123	2375	20.5474	23.2421	22.4842	23.2842	33.4316	29.0526	30.4842
DNA-Genome-Picea-abies-GCA_900067695.1-2016-11-09.one_line	11960690255	25	3	GTN_122	2075	12.7229	15.3253	14.3614	16.4337	23.0843	17.0602	18.6988
DNA-Genome-Picea-abies-GCA_900067695.1-2016-11-09.one_line	11960690255	25	3	C_1	2025	1.5802	0.5926	3.358	2.2222	7.4074	2.4691	4.1481
DNA-Genome-Picea-abies-GCA_900067695.1-2016-11-09.one_line	11960690255	25	3	G_1	2000	1.6	0.6	3.4	2.25	7.5	2.5	4.2
DNA-Genome-Picea-abies-GCA_900067695.1-2016-11-09.one_line	11960690255	25	3	CG_11	1725	8.9855	10.1449	11.2464	13.1014	19.942	13.2754	14.8406
DNA-Genome-Picea-abies-GCA_900067695.1-2016-11-09.one_line	11960690255	25	3	A_1	1650	1.9394	0.7273	4.1212	2.6667	9.1515	2.9091	4.8485
DNA-Genome-Picea-abies-GCA_900067695.1-2016-11-09.one_line	11960690255	25	3	CNG_123	1550	22.9677	24.8387	25.1613	26.3226	37.4194	30.7097	32.7742
DNA-Genome-Picea-abies-GCA_900067695.1-2016-11-09.one_line	11960690255	25	3	AN_11	1475	7.4576	9.1525	9.7627	9.8983	25.6271	11.5254	13.2881
DNA-Genome-Picea-abies-GCA_900067695.1-2016-11-09.one_line	11960690255	25	3	GN_11	1150	8.3478	8.9565	10.9565	10.9565	25.3043	12.6087	14.6087
DNA-Genome-Picea-abies-GCA_900067695.1-2016-11-09.one_line	11960690255	25	3	T_1	1075	2.9767	1.1163	6.3256	4.186	13.6744	4.093	7.0698
DNA-Genome-Picea-abies-GCA_900067695.1-2016-11-09.one_line	11960690255	25	3	CN_11	900	9.4444	9.7778	12.6667	12.4444	32.3333	13.6667	16.8889
DNA-Genome-Picea-abies-GCA_900067695.1-2016-11-09.one_line	11960690255	25	3	NCT_122	675	16	13.9259	18.0741	16.1481	36.4444	18.2222	23.1111
DNA-Genome-Picea-abies-GCA_900067695.1-2016-11-09.one_line	11960690255	25	3	GCN_123	500	34.2	32.2	38.8	38.6	65.4	44.4	51.2
DNA-Genome-Picea-abies-GCA_900067695.1-2016-11-09.one_line	11960690255	25	3	NAC_122	450	18.4444	15.5556	22.6667	19.5556	49.7778	22.4444	30.2222
DNA-Genome-Picea-abies-GCA_900067695.1-2016-11-09.one_line	11960690255	25	3	CGN_123	425	35.7647	32.9412	40.4706	39.5294	68.7059	44.2353	51.7647
DNA-Genome-Picea-abies-GCA_900067695.1-2016-11-09.one_line	11960690255	25	3	NAG_122	425	19.5294	16.9412	23.5294	20.2353	48.9412	23.5294	31.0588
DNA-Genome-Picea-abies-GCA_900067695.1-2016-11-09.one_line	11960690255	25	3	NTG_122	375	22.1333	19.7333	25.6	23.2	52.5333	24.8	34.1333
DNA-Genome-Picea-abies-GCA_900067695.1-2016-11-09.one_line	11960690255	25	3	CGN_122	250	27.2	19.6	35.2	32.4	74.8	33.2	46.4
DNA-Genome-Picea-abies-GCA_900067695.1-2016-11-09.one_line	11960690255	25	3	GCN_122	200	31.5	23	41	36.5	86	34	50
DNA-Genome-Picea-abies-GCA_900067695.1-2016-11-09.one_line	11960690255	50	3	ACT_222	5449858905	23.9054	22.3836	23.8003	26.9748	19.7163	22.0483	22.0821
DNA-Genome-Picea-abies-GCA_900067695.1-2016-11-09.one_line	11960690255	50	3	TAC_123	2196110100	22.5728	22.5786	22.8298	26.1784	20.9192	22.5789	22.6007
DNA-Genome-Picea-abies-GCA_900067695.1-2016-11-09.one_line	11960690255	50	3	ATC_123	1945075900	22.5259	22.5541	22.7914	26.1477	20.9512	22.5841	22.6064
DNA-Genome-Picea-abies-GCA_900067695.1-2016-11-09.one_line	11960690255	50	3	TCA_123	574224900	21.8895	21.4053	21.8871	25.991	19.6289	21.3589	21.4005
DNA-Genome-Picea-abies-GCA_900067695.1-2016-11-09.one_line	11960690255	50	3	AGC_123	495287800	21.9099	21.4853	21.9457	25.9307	19.7714	21.4577	21.5001
DNA-Genome-Picea-abies-GCA_900067695.1-2016-11-09.one_line	11960690255	50	3	ACT_123	463025650	21.8735	21.6515	21.9152	25.9523	19.9731	21.6555	21.6889
DNA-Genome-Picea-abies-GCA_900067695.1-2016-11-09.one_line	11960690255	50	3	TGA_123	358815550	21.7769	21.5291	21.7655	25.7903	19.9067	21.5457	21.575
DNA-Genome-Picea-abies-GCA_900067695.1-2016-11-09.one_line	11960690255	50	3	GAC_123	120183850	21.1629	20.7705	21.1054	25.5634	19.2817	20.7066	20.7371
DNA-Genome-Picea-abies-GCA_900067695.1-2016-11-09.one_line	11960690255	50	3	CTA_123	114207900	20.7092	20.2351	20.6334	25.3059	18.8307	20.2799	20.2955
DNA-Genome-Picea-abies-GCA_900067695.1-2016-11-09.one_line	11960690255	50	3	CAT_123	93538100	20.6935	20.259	20.5685	25.3375	18.9469	20.2436	20.2443
DNA-Genome-Picea-abies-GCA_900067695.1-2016-11-09.one_line	11960690255	50	3	GTA_123	74726000	20.8715	20.5466	20.6789	25.3824	19.2985	20.4383	20.4411
DNA-Genome-Picea-abies-GCA_900067695.1-2016-11-09.one_line	11960690255	50	3	ACT_122	12278600	16.4165	16.6859	16.7233	20.4407	17.1697	17.3562	17.1766
DNA-Genome-Picea-abies-GCA_900067695.1-2016-11-09.one_line	11960690255	50	3	TAG_122	11023000	16.4036	16.7098	16.7279	20.371	17.2156	17.3899	17.2066
DNA-Genome-Picea-abies-GCA_900067695.1-2016-11-09.one_line	11960690255	50	3	ATG_122	10105350	16.5521	16.7903	16.8391	20.5	17.3648	17.5194	17.3419
DNA-Genome-Picea-abies-GCA_900067695.1-2016-11-09.one_line	11960690255	50	3	TAC_122	9570350	16.4914	16.6798	16.7586	20.4144	17.2721	17.4321	17.2481
DNA-Genome-Picea-abies-GCA_900067695.1-2016-11-09.one_line	11960690255	50	3	GCA_123	7116500	18.9234	19.5831	19.041	23.2383	18.7992	18.8648	18.7964
DNA-Genome-Picea-abies-GCA_900067695.1-2016-11-09.one_line	11960690255	50	3	CGA_123	6906000	18.7379	19.1369	18.8421	23.0619	18.6149	18.6763	18.6145
DNA-Genome-Picea-abies-GCA_900067695.1-2016-11-09.one_line	11960690255	50	3	CAT_122	4136150	15.3443	16.1918	15.5642	19.0916	16.2054	16.3134	16.1786
DNA-Genome-Picea-abies-GCA_900067695.1-2016-11-09.one_line	11960690255	50	3	ATG_222	3603050	23.5865	24.6908	23.987	27.099	24.249	24.2337	24.2452
DNA-Genome-Picea-abies-GCA_900067695.1-2016-11-09.one_line	11960690255	50	3	GAT_122	2866500	15.6045	16.4073	15.8324	19.1966	16.5166	16.6127	16.4909
DNA-Genome-Picea-abies-GCA_900067695.1-2016-11-09.one_line	11960690255	50	3	AT_11	1456500	7.3686	8.1057	7.4604	9.6176	9.0591	9.4695	9.0483
DNA-Genome-Picea-abies-GCA_900067695.1-2016-11-09.one_line	11960690255	50	3	CTG_222	795400	23.9872	25.1707	24.482	26.7473	24.9344	24.8928	24.9736
DNA-Genome-Picea-abies-GCA_900067695.1-2016-11-09.one_line	11960690255	50	3	ATN_222	722800	21.3042	24.1197	21.9447	24.3675	23.6551	23.6462	23.6198
DNA-Genome-Picea-abies-GCA_900067695.1-2016-11-09.one_line	11960690255	50	3	ACG_222	698850	24.007	25.2599	24.5137	26.8158	25.0577	25.0871	25.032
DNA-Genome-Picea-abies-GCA_900067695.1-2016-11-09.one_line	11960690255	50	3	ATG_123	596450	22.9414	23.6605	23.66	26.359	24.3974	24.3558	24.3568
DNA-Genome-Picea-abies-GCA_900067695.1-2016-11-09.one_line	11960690255	50	3	TAG_123	572550	22.7877	23.5036	23.5127	26.2257	24.3612	24.2197	24.225
DNA-Genome-Picea-abies-GCA_900067695.1-2016-11-09.one_line	11960690255	50	3	TAC_133	356000	21.6949	23.8567	22.4017	25.0407	23.5525	23.4958	23.5202
DNA-Genome-Picea-abies-GCA_900067695.1-2016-11-09.one_line	11960690255	50	3	ACT_133	354800	21.7139	23.7573	22.4262	25.0967	23.52	23.4428	23.4735
DNA-Genome-Picea-abies-GCA_900067695.1-2016-11-09.one_line	11960690255	50	3	AGT_123	225700	22.9393	23.7319	23.6801	26.4023	24.7878	24.6225	24.693
DNA-Genome-Picea-abies-GCA_900067695.1-2016-11-09.one_line	11960690255	50	3	CTN_222	176900	21.3431	24.3166	22.0961	24.5297	24.4014	24.4076	24.3912
DNA-Genome-Picea-abies-GCA_900067695.1-2016-11-09.one_line	11960690255	50	3	AGN_222	167300	21.3724	24.3126	22.1148	24.4573	24.5678	24.5505	24.4806
DNA-Genome-Picea-abies-GCA_900067695.1-2016-11-09.one_line	11960690255	50	3	ACN_222	155850	21.2268	23.9621	21.9262	24.1527	24.1829	24.1514	24.1155
DNA-Genome-Picea-abies-GCA_900067695.1-2016-11-09.one_line	11960690255	50	3	ACG_122	145350	13.9938	14.1163	14.2814	16.3825	15.2453	15.0581	14.9377
DNA-Genome-Picea-abies-GCA_900067695.1-2016-11-09.one_line	11960690255	50	3	TCG_122	142400	13.9888	14.2015	14.2739	16.3989	15.3553	15.2346	15.1292
DNA-Genome-Picea-abies-GCA_900067695.1-2016-11-09.one_line	11960690255	50	3	TGN_222	140550	21.1953	24.0021	21.9139	24.1274	24.2092	24.1693	24.1537
DNA-Genome-Picea-abies-GCA_900067695.1-2016-11-09.one_line	11960690255	50	3	ATN_123	134150	19.9202	22.0634	20.823	23.9821	22.9884	22.773	22.8013
DNA-Genome-Picea-abies-GCA_900067695.1-2016-11-09.one_line	11960690255	50	3	CT_11	134050	6.038	7.5517	6.2051	7.6136	8.1992	8.5513	8.0239
DNA-Genome-Picea-abies-GCA_900067695.1-2016-11-09.one_line	11960690255	50	3	TAN_123	127050	19.9331	22.0331	20.8564	23.9937	22.8855	22.7092	22.7501
DNA-Genome-Picea-abies-GCA_900067695.1-2016-11-09.one_line	11960690255	50	3	AG_11	114250	5.9589	7.3996	6.1724	7.4608	8.1374	8.4298	7.8915
DNA-Genome-Picea-abies-GCA_900067695.1-2016-11-09.one_line	11960690255	50	3	TCG_123	85050	23.525	24.7137	24.5009	27.224	26.3469	26.2152	26.2011
DNA-Genome-Picea-abies-GCA_900067695.1-2016-11-09.one_line	11960690255	50	3	ACG_123	68800	23.1831	23.9767	24.0959	26.6759	25.8081	25.4855	25.6628
DNA-Genome-Picea-abies-GCA_900067695.1-2016-11-09.one_line	11960690255	50	3	GAT_123	68750	22.5702	23.8633	23.552	26.4495	25.5985	25.5098	25.4545
DNA-Genome-Picea-abies-GCA_900067695.1-2016-11-09.one_line	11960690255	50	3	TGC_123	59500	23.2908	24.1882	24.2218	26.7748	26.1277	25.8168	25.9294
DNA-Genome-Picea-abies-GCA_900067695.1-2016-11-09.one_line	11960690255	50	3	CTG_122	50100	12.9541	15.006	13.4212	16.012	15.6647	15.1317	15.1297
DNA-Genome-Picea-abies-GCA_900067695.1-2016-11-09.one_line	11960690255	50	3	ATN_122	47550	4.1577	5.0894	4.3197	5.6635	8.2776	6.2965	5.8465
DNA-Genome-Picea-abies-GCA_900067695.1-2016-11-09.one_line	11960690255	50	3	AC_11	43250	2.1873	2.9434	2.5295	3.1514	4.4763	3.7688	3.6439
DNA-Genome-Picea-abies-GCA_900067695.1-2016-11-09.one_line	11960690255	50	3	TG_11	40300	2.3127	3.0422	2.6799	3.2754	4.7171	3.871	3.7618
DNA-Genome-Picea-abies-GCA_900067695.1-2016-11-09.one_line	11960690255	50	3	GAC_122	35000	13.4829	15.4714	14.04	16.6343	16.5771	15.9629	16
DNA-Genome-Picea-abies-GCA_900067695.1-2016-11-09.one_line	11960690255	50	3	AGN_123	27950	19.8998	21.8819	21.0662	24.0107	24.0179	23.5277	23.585
DNA-Genome-Picea-abies-GCA_900067695.1-2016-11-09.one_line	11960690255	50	3	TCN_123	27200	19.9338	21.9743	21.1324	24.1397	24.1838	23.5882	23.8529
DNA-Genome-Picea-abies-GCA_900067695.1-2016-11-09.one_line	11960690255	50	3	CAT_133	21700	21.5806	24.2995	22.6452	25	25.9816	25.4977	25.6406
DNA-Genome-Picea-abies-GCA_900067695.1-2016-11-09.one_line	11960690255	50	3	GAC_133	20500	21.4195	23.922	22.478	24.6927	25.6634	25.1366	25.3268
DNA-Genome-Picea-abies-GCA_900067695.1-2016-11-09.one_line	11960690255	50	3	CTG_123	20250	24.1136	25.0123	25.4123	27.921	28.4741	27.8568	27.9901
DNA-Genome-Picea-abies-GCA_900067695.1-2016-11-09.one_line	11960690255	50	3	TAN_122	18550	4.7709	5.8706	5.1213	6.4151	10.0701	7.2075	6.7709
DNA-Genome-Picea-abies-GCA_900067695.1-2016-11-09.one_line	11960690255	50	3	CGN_222	18250	22.1041	24.6959	23.1781	24.9699	26.9041	26.3288	26.4986
DNA-Genome-Picea-abies-GCA_900067695.1-2016-11-09.one_line	11960690255	50	3	TGN_123	17500	19.8571	21.5657	21.0857	23.6571	24.5086	23.6514	23.9086
DNA-Genome-Picea-abies-GCA_900067695.1-2016-11-09.one_line	11960690255	50	3	ACN_123	17400	19.9655	21.5747	21.1724	23.7759	24.5115	23.6839	23.8621
DNA-Genome-Picea-abies-GCA_900067695.1-2016-11-09.one_line	11960690255	50	3	CAG_123	12400	24.1048	24.8226	25.4516	27.7177	28.7661	27.7661	28.0323
DNA-Genome-Picea-abies-GCA_900067695.1-2016-11-09.one_line	11960690255	50	3	GTC_123	11850	23.8819	24.9198	25.2152	27.5021	28.8692	27.9072	28.1519
DNA-Genome-Picea-abies-GCA_900067695.1-2016-11-09.one_line	11960690255	50	3	GAN_123	10000	19.98	22.07	21.52	24.43	25.98	24.82	25.12
DNA-Genome-Picea-abies-GCA_900067695.1-2016-11-09.one_line	11960690255	50	3	CTN_123	8800	20.0455	22.1591	21.5227	24.4205	26.3636	24.7841	25.1818
DNA-Genome-Picea-abies-GCA_900067695.1-2016-11-09.one_line	11960690255	50	3	CAG_122	8050	12.7453	13.0559	13.6149	15.2795	17.7267	15.4161	15.7516
DNA-Genome-Picea-abies-GCA_900067695.1-2016-11-09.one_line	11960690255	50	3	GCT_122	7100	11.507	11.9577	12.338	14.0141	16.9437	14.6056	14.7042
DNA-Genome-Picea-abies-GCA_900067695.1-2016-11-09.one_line	11960690255	50	3	CTN_122	6450	5.3643	6.3411	6.0465	7.0698	12.6047	7.5659	7.814
DNA-Genome-Picea-abies-GCA_900067695.1-2016-11-09.one_line	11960690255	50	3	TNA_123	6050	16.1653	18.6612	17.6198	19.4876	24.4298	21.686	22.3471
DNA-Genome-Picea-abies-GCA_900067695.1-2016-11-09.one_line	11960690255	50	3	ANT_123	5350	17.3645	19.4953	18.8785	20.7477	25.3832	23.215	23.9252
DNA-Genome-Picea-abies-GCA_900067695.1-2016-11-09.one_line	11960690255	50	3	AGN_122	5250	5.6	6.7619	6.4	7.3714	13.3714	8.2667	8.381
DNA-Genome-Picea-abies-GCA_900067695.1-2016-11-09.one_line	11960690255	50	3	GTN_123	4100	21.4634	23	23.0244	25.7561	29.5122	26.9512	27.8049
DNA-Genome-Picea-abies-GCA_900067695.1-2016-11-09.one_line	11960690255	50	3	CAN_123	4100	21.7073	23.561	23.5122	25.7073	29.9756	27.3902	28.2927
DNA-Genome-Picea-abies-GCA_900067695.1-2016-11-09.one_line	11960690255	50	3	ACN_122	3950	6.0759	6.962	7.038	8.1266	14.2532	8.7089	8.9114
DNA-Genome-Picea-abies-GCA_900067695.1-2016-11-09.one_line	11960690255	50	3	GCT_123	3800	25.5263	26.3947	27.3684	29.6053	34.5526	31.6579	32.5263
DNA-Genome-Picea-abies-GCA_900067695.1-2016-11-09.one_line	11960690255	50	3	CGT_123	3700	26.2432	26.7568	28.2703	30.2973	35.2432	32.4324	33.2973
DNA-Genome-Picea-abies-GCA_900067695.1-2016-11-09.one_line	11960690255	50	3	TGN_122	2900	7.069	7.5862	8	9.1034	16.5172	9.6897	10.3448
DNA-Genome-Picea-abies-GCA_900067695.1-2016-11-09.one_line	11960690255	50	3	TCN_122	2750	8.0727	8.9818	9.1636	10.1455	17.6364	10.4727	11.2
DNA-Genome-Picea-abies-GCA_900067695.1-2016-11-09.one_line	11960690255	50	3	TNC_123	2600	18.8462	20.6154	20.6154	22.4231	29.3846	25.1538	26.4615
DNA-Genome-Picea-abies-GCA_900067695.1-2016-11-09.one_line	11960690255	50	3	ANG_123	2400	20	21.75	21.9167	23.6667	31.2917	26.7917	28.1667
DNA-Genome-Picea-abies-GCA_900067695.1-2016-11-09.one_line	11960690255	50	3	TNG_123	2400	19.25	20.875	21.3333	22.8333	30.3333	25.4167	26.8333
DNA-Genome-Picea-abies-GCA_900067695.1-2016-11-09.one_line	11960690255	50	3	GAN_122	2300	7.6087	8.2609	8.7826	9.1304	18.6957	10.3043	11.3043
DNA-Genome-Picea-abies-GCA_900067695.1-2016-11-09.one_line	11960690255	50	3	ANC_123	1950	18.9744	20.8205	20.9231	22.3077	30.5641	25.4359	26.8718
DNA-Genome-Picea-abies-GCA_900067695.1-2016-11-09.one_line	11960690255	50	3	GTN_122	1250	9.28	8.48	10.56	10.8	23.92	11.6	13.76
DNA-Genome-Picea-abies-GCA_900067695.1-2016-11-09.one_line	11960690255	50	3	CAN_122	1250	8.8	8.16	10.4	10.08	23.68	11.2	12.48
DNA-Genome-Picea-abies-GCA_900067695.1-2016-11-09.one_line	11960690255	50	3	GNT_123	1100	21.1818	21.4545	23.0909	24.1818	38.5455	28.4545	31.6364
DNA-Genome-Picea-abies-GCA_900067695.1-2016-11-09.one_line	11960690255	50	3	GNA_123	950	20.6316	20.4211	22.9474	24.5263	40	26.9474	30.3158
DNA-Genome-Picea-abies-GCA_900067695.1-2016-11-09.one_line	11960690255	50	3	CNT_123	850	22.7059	22.7059	25.1765	26.4706	42.2353	30	33.8824
DNA-Genome-Picea-abies-GCA_900067695.1-2016-11-09.one_line	11960690255	50	3	GCN_123	650	27.3846	25.3846	29.8462	31.2308	50.6154	34.6154	40
DNA-Genome-Picea-abies-GCA_900067695.1-2016-11-09.one_line	11960690255	50	3	CGN_123	500	32.6	27.8	36	36.8	61	40.2	47.2
DNA-Genome-Picea-abies-GCA_900067695.1-2016-11-09.one_line	11960690255	50	3	CNA_123	500	26.8	24	30.8	31.8	55.6	34.6	41.6
DNA-Genome-Picea-abies-GCA_900067695.1-2016-11-09.one_line	11960690255	50	3	CNG_123	150	47.3333	34.6667	60	52.6667	126	56.6667	80
DNA-Genome-Picea-abies-GCA_900067695.1-2016-11-09.one_line	11960690255	50	3	GNC_123	150	48	35.3333	61.3333	53.3333	127.333	58	80
DNA-Genome-Picea-abies-GCA_900067695.1-2016-11-09.one_line	11960690255	100	3	ACT_222	6339132600	23.8156	21.2849	23.6861	26.9712	18.396	21.0341	21.0642
DNA-Genome-Picea-abies-GCA_900067695.1-2016-11-09.one_line	11960690255	100	3	TAC_123	2183551055	22.6724	21.9595	22.842	26.2685	19.8301	21.8965	21.9022
DNA-Genome-Picea-abies-GCA_900067695.1-2016-11-09.one_line	11960690255	100	3	ATC_123	2065073200	22.6651	21.9815	22.8422	26.2631	19.8452	21.9088	21.9057
DNA-Genome-Picea-abies-GCA_900067695.1-2016-11-09.one_line	11960690255	100	3	TCA_123	393437500	21.4897	19.865	21.2824	25.8881	17.6799	19.6954	19.6683
DNA-Genome-Picea-abies-GCA_900067695.1-2016-11-09.one_line	11960690255	100	3	AGC_123	350021600	21.5527	20.0005	21.4217	25.8687	17.8298	19.8115	19.7878
DNA-Genome-Picea-abies-GCA_900067695.1-2016-11-09.one_line	11960690255	100	3	ACT_123	246235600	21.2753	19.9326	21.1265	25.7335	17.8614	19.9036	19.8391
DNA-Genome-Picea-abies-GCA_900067695.1-2016-11-09.one_line	11960690255	100	3	TGA_123	202263000	21.2223	19.8746	21.0204	25.6011	17.8515	19.8268	19.7584
DNA-Genome-Picea-abies-GCA_900067695.1-2016-11-09.one_line	11960690255	100	3	CTA_123	56774400	19.6088	18.316	19.3975	24.5148	17.1174	18.4274	18.2945
DNA-Genome-Picea-abies-GCA_900067695.1-2016-11-09.one_line	11960690255	100	3	GAC_123	47711700	20.1093	18.9537	19.9356	24.9429	17.7836	18.8696	18.774
DNA-Genome-Picea-abies-GCA_900067695.1-2016-11-09.one_line	11960690255	100	3	CAT_123	28826800	18.92	17.8038	18.6267	24.2493	16.9677	17.7186	17.4946
DNA-Genome-Picea-abies-GCA_900067695.1-2016-11-09.one_line	11960690255	100	3	GTA_123	22106800	19.3967	18.3373	18.9185	24.4351	17.553	18.0881	17.8857
DNA-Genome-Picea-abies-GCA_900067695.1-2016-11-09.one_line	11960690255	100	3	ATG_222	8232200	22.7109	22.0999	22.9461	26.5278	21.6288	21.6634	21.6168
DNA-Genome-Picea-abies-GCA_900067695.1-2016-11-09.one_line	11960690255	100	3	CGA_123	2331800	17.392	17.46	17.4625	20.6091	16.7571	16.9414	16.7188
DNA-Genome-Picea-abies-GCA_900067695.1-2016-11-09.one_line	11960690255	100	3	GCA_123	2088300	17.6684	17.5478	17.7583	20.8041	16.9955	17.1779	16.9759
DNA-Genome-Picea-abies-GCA_900067695.1-2016-11-09.one_line	11960690255	100	3	TAG_123	1669400	21.9942	21.4375	22.4234	25.2835	21.7887	21.7081	21.694
DNA-Genome-Picea-abies-GCA_900067695.1-2016-11-09.one_line	11960690255	100	3	ATG_123	1639500	22.0658	21.5008	22.4967	25.304	21.7918	21.7344	21.7227
DNA-Genome-Picea-abies-GCA_900067695.1-2016-11-09.one_line	11960690255	100	3	ACT_122	1258700	15.5567	16.012	15.9037	18.912	16.4427	16.5093	16.4049
DNA-Genome-Picea-abies-GCA_900067695.1-2016-11-09.one_line	11960690255	100	3	CTG_222	1217500	23.3071	22.8925	23.5877	26.0269	22.6181	22.5812	22.5603
DNA-Genome-Picea-abies-GCA_900067695.1-2016-11-09.one_line	11960690255	100	3	TAG_122	1167100	15.5635	16.0745	15.9498	18.9072	16.4862	16.5533	16.4466
DNA-Genome-Picea-abies-GCA_900067695.1-2016-11-09.one_line	11960690255	100	3	ACG_222	1070000	23.4421	23.0775	23.7357	26.0581	22.8216	22.7842	22.7634
DNA-Genome-Picea-abies-GCA_900067695.1-2016-11-09.one_line	11960690255	100	3	CAT_122	902900	14.3222	16.1126	14.651	17.6216	15.5904	15.5961	15.5069
DNA-Genome-Picea-abies-GCA_900067695.1-2016-11-09.one_line	11960690255	100	3	ATG_122	827600	15.9103	16.2322	16.2608	18.9544	16.8284	16.8967	16.7593
DNA-Genome-Picea-abies-GCA_900067695.1-2016-11-09.one_line	11960690255	100	3	TAC_122	803400	15.9081	16.1621	16.2397	18.9373	16.7474	16.7914	16.6985
DNA-Genome-Picea-abies-GCA_900067695.1-2016-11-09.one_line	11960690255	100	3	GAT_122	591600	14.5245	16.2181	14.8492	17.8139	15.833	15.821	15.7708
DNA-Genome-Picea-abies-GCA_900067695.1-2016-11-09.one_line	11960690255	100	3	AGT_123	498600	22.0351	21.4312	22.5082	24.8444	21.8889	21.779	21.7625
DNA-Genome-Picea-abies-GCA_900067695.1-2016-11-09.one_line	11960690255	100	3	TAC_133	285700	21.7315	21.8768	22.252	24.4704	21.9097	21.7861	21.7907
DNA-Genome-Picea-abies-GCA_900067695.1-2016-11-09.one_line	11960690255	100	3	ACT_133	275800	21.7893	21.9953	22.3437	24.5649	22.091	21.9801	21.984
DNA-Genome-Picea-abies-GCA_900067695.1-2016-11-09.one_line	11960690255	100	3	TCG_123	140100	22.7045	22.4183	23.3205	25.7302	23.5203	23.2755	23.3662
DNA-Genome-Picea-abies-GCA_900067695.1-2016-11-09.one_line	11960690255	100	3	ACG_123	96800	22.6147	22.22	23.2066	25.5331	23.4246	23.1467	23.2025
DNA-Genome-Picea-abies-GCA_900067695.1-2016-11-09.one_line	11960690255	100	3	GAT_123	95600	21.8264	22.0262	22.5544	25.25	23.5795	23.1276	23.318
DNA-Genome-Picea-abies-GCA_900067695.1-2016-11-09.one_line	11960690255	100	3	TGC_123	89300	22.6618	21.9171	23.252	25.439	23.187	22.8757	22.9653
DNA-Genome-Picea-abies-GCA_900067695.1-2016-11-09.one_line	11960690255	100	3	AT_11	67400	5.6484	6.1395	5.9881	7.2196	7.4659	7.4985	7.3531
DNA-Genome-Picea-abies-GCA_900067695.1-2016-11-09.one_line	11960690255	100	3	TAN_123	50500	13.4515	14.2198	14.1386	16.4238	17.295	16.3366	15.9287
DNA-Genome-Picea-abies-GCA_900067695.1-2016-11-09.one_line	11960690255	100	3	ATN_123	48700	13.0945	13.9199	13.7864	15.9733	16.9671	16.1622	15.7043
DNA-Genome-Picea-abies-GCA_900067695.1-2016-11-09.one_line	11960690255	100	3	CTG_123	18900	23.4339	22.9153	24.3915	26.7196	26.3862	25.545	25.7566
DNA-Genome-Picea-abies-GCA_900067695.1-2016-11-09.one_line	11960690255	100	3	CAG_123	10200	23.9216	23.8529	25.0196	27.1275	27.6569	26.3725	26.902
DNA-Genome-Picea-abies-GCA_900067695.1-2016-11-09.one_line	11960690255	100	3	GTC_123	9900	24.0101	23.7071	25.1717	27.3333	27.7172	26.3939	26.8687
DNA-Genome-Picea-abies-GCA_900067695.1-2016-11-09.one_line	11960690255	100	3	CAT_133	6200	23.7581	24.0968	24.8065	26.8871	29.0484	27.3548	27.8065
DNA-Genome-Picea-abies-GCA_900067695.1-2016-11-09.one_line	11960690255	100	3	CT_11	6100	7.7869	9.0328	8.5902	9.377	12.4426	10.4262	10.7541
DNA-Genome-Picea-abies-GCA_900067695.1-2016-11-09.one_line	11960690255	100	3	AGN_123	5500	15.6364	15.5273	16.6909	18.7091	22.3818	19.2364	19.4909
DNA-Genome-Picea-abies-GCA_900067695.1-2016-11-09.one_line	11960690255	100	3	GAC_133	4900	23.7551	24.1837	24.898	27.3061	30.3061	27.7347	28.4082
DNA-Genome-Picea-abies-GCA_900067695.1-2016-11-09.one_line	11960690255	100	3	TCG_122	4700	12.8723	12.8723	13.8723	15	17.7872	14.9787	15.8298
DNA-Genome-Picea-abies-GCA_900067695.1-2016-11-09.one_line	11960690255	100	3	ACG_122	4300	12.7442	13	14.0465	15.1395	18.7674	15.6512	16.2791
DNA-Genome-Picea-abies-GCA_900067695.1-2016-11-09.one_line	11960690255	100	3	AG_11	3800	7.8947	9.5263	9.0526	9.5	14.6053	11.1053	11.7895
DNA-Genome-Picea-abies-GCA_900067695.1-2016-11-09.one_line	11960690255	100	3	GCT_123	3700	25.2162	25.3243	26.5405	29.1081	32.7027	29.973	30.8108
DNA-Genome-Picea-abies-GCA_900067695.1-2016-11-09.one_line	11960690255	100	3	GAN_123	3600	15.75	17.1389	17	18.8611	24.2778	20	20.6667
DNA-Genome-Picea-abies-GCA_900067695.1-2016-11-09.one_line	11960690255	100	3	TCN_123	3300	13.3333	13.7273	14.1818	15.3636	23.1515	17.8182	18.1818
DNA-Genome-Picea-abies-GCA_900067695.1-2016-11-09.one_line	11960690255	100	3	CGT_123	3000	26.0667	25.9	27.6	29.7667	34.8	31.1667	32.1333
DNA-Genome-Picea-abies-GCA_900067695.1-2016-11-09.one_line	11960690255	100	3	ACN_123	2900	12.931	12.931	13.7241	14.6207	22.7586	16.8276	17.6552
DNA-Genome-Picea-abies-GCA_900067695.1-2016-11-09.one_line	11960690255	100	3	TGN_123	2700	10.963	11.3333	11.8519	12.2222	21.8889	15.7037	16.1481
DNA-Genome-Picea-abies-GCA_900067695.1-2016-11-09.one_line	11960690255	100	3	CTN_123	2400	17.3333	17.4167	18.8333	20.6667	29.1667	22	23
DNA-Genome-Picea-abies-GCA_900067695.1-2016-11-09.one_line	11960690255	100	3	CTG_122	2400	12.375	13.7083	13.75	14.8333	21.0417	16.25	17.3333
DNA-Genome-Picea-abies-GCA_900067695.1-2016-11-09.one_line	11960690255	100	3	AC_11	2200	3.0909	2.7727	4.8182	3.7273	10.7273	4.6364	6.1818
DNA-Genome-Picea-abies-GCA_900067695.1-2016-11-09.one_line	11960690255	100	3	ATN_122	1500	10.7333	10.9333	12	12.6	25.1333	13.6	15.4667
DNA-Genome-Picea-abies-GCA_900067695.1-2016-11-09.one_line	11960690255	100	3	GAC_122	1300	14.8462	15	17.3846	18.1538	28.5385	18.6923	20.9231
DNA-Genome-Picea-abies-GCA_900067695.1-2016-11-09.one_line	11960690255	100	3	TG_11	800	6.625	3.625	10	7	23.625	7.5	11.5
DNA-Genome-Picea-abies-GCA_900067695.1-2016-11-09.one_line	11960690255	100	3	TAN_122	700	16	14.7143	18.5714	18.5714	37.8571	19	23.4286
DNA-Genome-Picea-abies-GCA_900067695.1-2016-11-09.one_line	11960690255	100	3	GAN_122	500	15.4	12.2	19.2	16.2	45.6	19	24.8
DNA-Genome-Picea-abies-GCA_900067695.1-2016-11-09.one_line	11960690255	100	3	CAN_123	500	22.4	17.8	25.6	23	53.6	27.8	33.6
DNA-Genome-Picea-abies-GCA_900067695.1-2016-11-09.one_line	11960690255	100	3	GTN_123	400	20.5	15.25	24.5	21	58.5	25.25	33
DNA-Genome-Picea-abies-GCA_900067695.1-2016-11-09.one_line	11960690255	100	3	CAG_122	300	17.6667	9.3333	24.6667	16.3333	62.3333	18.6667	29.3333
DNA-Genome-Picea-abies-GCA_900067695.1-2016-11-09.one_line	11960690255	100	3	CTN_122	200	31.5	17	41	34	91	35	52
DNA-Genome-Picea-abies-GCA_900067695.1-2016-11-09.one_line	11960690255	100	3	GCT_122	200	28.5	15	38	27	83	28	44
DNA-Genome-Picea-abies-GCA_900067695.1-2016-11-09.one_line	11960690255	100	3	ACN_122	200	27	17	38	30	85.5	28.5	44
DNA-Genome-Picea-abies-GCA_900067695.1-2016-11-09.one_line	11960690255	100	3	TGN_122	100	46	19	66	48	155	46	76
DNA-Genome-Picea-abies-GCA_900067695.1-2016-11-09.one_line	11960690255	100	3	TCN_122	100	43	18	66	45	155	46	76
DNA-Genome-Picea-abies-GCA_900067695.1-2016-11-09.one_line	11960690255	125	3	ACT_222	6590383755	23.799	21.0686	23.6692	26.9673	18.1493	20.849	20.879
DNA-Genome-Picea-abies-GCA_900067695.1-2016-11-09.one_line	11960690255	125	3	TAC_123	2165542625	22.699	21.801	22.8502	26.2912	19.5675	21.7196	21.7226
DNA-Genome-Picea-abies-GCA_900067695.1-2016-11-09.one_line	11960690255	125	3	ATC_123	2061678000	22.692	21.8195	22.8509	26.2853	19.5742	21.7263	21.7179
DNA-Genome-Picea-abies-GCA_900067695.1-2016-11-09.one_line	11960690255	125	3	TCA_123	341640500	21.3368	19.4236	21.0848	25.8344	17.1664	19.2172	19.1741
DNA-Genome-Picea-abies-GCA_900067695.1-2016-11-09.one_line	11960690255	125	3	AGC_123	303871750	21.4151	19.5306	21.2355	25.8213	17.3187	19.33	19.2931
DNA-Genome-Picea-abies-GCA_900067695.1-2016-11-09.one_line	11960690255	125	3	ACT_123	195691750	21.0393	19.3395	20.8402	25.6298	17.2544	19.3424	19.2516
DNA-Genome-Picea-abies-GCA_900067695.1-2016-11-09.one_line	11960690255	125	3	TGA_123	162986250	21.0152	19.3337	20.767	25.5113	17.2721	19.2776	19.1855
DNA-Genome-Picea-abies-GCA_900067695.1-2016-11-09.one_line	11960690255	125	3	CTA_123	44346875	19.2115	17.8672	18.9906	24.1758	16.8176	17.9784	17.8128
DNA-Genome-Picea-abies-GCA_900067695.1-2016-11-09.one_line	11960690255	125	3	GAC_123	35590875	19.8609	18.5288	19.7469	24.7114	17.5662	18.4553	18.3392
DNA-Genome-Picea-abies-GCA_900067695.1-2016-11-09.one_line	11960690255	125	3	CAT_123	19931125	18.2923	17.011	17.8925	23.6869	16.3604	16.9401	16.6574
DNA-Genome-Picea-abies-GCA_900067695.1-2016-11-09.one_line	11960690255	125	3	GTA_123	14987250	18.52	17.8205	18.6313	23.9389	17.0307	17.402	17.1702
DNA-Genome-Picea-abies-GCA_900067695.1-2016-11-09.one_line	11960690255	125	3	ATG_222	10410500	22.593	21.7045	22.7953	26.5379	21.1585	21.2203	21.1503
DNA-Genome-Picea-abies-GCA_900067695.1-2016-11-09.one_line	11960690255	125	3	TAG_123	2176625	21.9944	21.3001	22.3787	25.3832	21.5204	21.4723	21.4361
DNA-Genome-Picea-abies-GCA_900067695.1-2016-11-09.one_line	11960690255	125	3	ATG_123	2165375	21.926	21.1603	22.3062	25.2801	21.3329	21.3055	21.2375
DNA-Genome-Picea-abies-GCA_900067695.1-2016-11-09.one_line	11960690255	125	3	CGA_123	1542250	17.1769	16.9519	17.2458	19.8382	16.3212	16.5148	16.3271
DNA-Genome-Picea-abies-GCA_900067695.1-2016-11-09.one_line	11960690255	125	3	GCA_123	1334250	17.4413	17.2696	17.5261	20.031	16.6328	16.8036	16.6062
DNA-Genome-Picea-abies-GCA_900067695.1-2016-11-09.one_line	11960690255	125	3	CTG_222	1268125	23.3151	22.7462	23.5649	25.9593	22.3498	22.3266	22.312
DNA-Genome-Picea-abies-GCA_900067695.1-2016-11-09.one_line	11960690255	125	3	ACG_222	1150375	23.3288	22.7118	23.577	25.9262	22.378	22.373	22.3478
DNA-Genome-Picea-abies-GCA_900067695.1-2016-11-09.one_line	11960690255	125	3	AGT_123	573875	22.0321	21.2977	22.4579	24.7392	21.6425	21.501	21.4869
DNA-Genome-Picea-abies-GCA_900067695.1-2016-11-09.one_line	11960690255	125	3	ACT_122	516750	15.564	15.9698	15.9601	18.651	16.485	16.5055	16.4459
DNA-Genome-Picea-abies-GCA_900067695.1-2016-11-09.one_line	11960690255	125	3	CAT_122	479000	14.3651	16.3234	14.7436	17.7148	15.7685	15.7125	15.6668
DNA-Genome-Picea-abies-GCA_900067695.1-2016-11-09.one_line	11960690255	125	3	TAG_122	473250	15.4848	15.8969	15.9155	18.5627	16.4425	16.4609	16.3592
DNA-Genome-Picea-abies-GCA_900067695.1-2016-11-09.one_line	11960690255	125	3	GAT_122	322000	14.4879	16.3202	14.8708	17.8531	16	15.9329	15.9043
DNA-Genome-Picea-abies-GCA_900067695.1-2016-11-09.one_line	11960690255	125	3	ATG_122	313375	16.0878	16.3274	16.4946	19.141	17.0869	17.0448	16.9726
DNA-Genome-Picea-abies-GCA_900067695.1-2016-11-09.one_line	11960690255	125	3	TAC_122	305250	16.1641	16.2794	16.5576	19.2023	17.0958	17.0785	16.9723
DNA-Genome-Picea-abies-GCA_900067695.1-2016-11-09.one_line	11960690255	125	3	TAC_133	218000	22.0803	22.0775	22.5229	24.7725	22.1477	22.1005	22.0771
DNA-Genome-Picea-abies-GCA_900067695.1-2016-11-09.one_line	11960690255	125	3	ACT_133	215375	22.0898	22.0337	22.5588	24.8441	22.2389	22.12	22.1456
DNA-Genome-Picea-abies-GCA_900067695.1-2016-11-09.one_line	11960690255	125	3	TCG_123	154750	22.6565	22.2048	23.2013	25.5528	23.0792	22.7645	22.8704
DNA-Genome-Picea-abies-GCA_900067695.1-2016-11-09.one_line	11960690255	125	3	GAT_123	96125	21.8153	22.0577	22.5352	25.1267	23.5194	23.0991	23.1365
DNA-Genome-Picea-abies-GCA_900067695.1-2016-11-09.one_line	11960690255	125	3	ACG_123	95000	22.7442	22.1926	23.3432	25.6253	23.3105	22.9716	23.0568
DNA-Genome-Picea-abies-GCA_900067695.1-2016-11-09.one_line	11960690255	125	3	TGC_123	91125	22.6502	21.8151	23.1989	25.3454	23.0431	22.7204	22.7863
DNA-Genome-Picea-abies-GCA_900067695.1-2016-11-09.one_line	11960690255	125	3	TAN_123	32875	12.2555	13.2471	12.9825	15.1148	16.438	15.7049	15.1848
DNA-Genome-Picea-abies-GCA_900067695.1-2016-11-09.one_line	11960690255	125	3	ATN_123	30125	12.01	13.1187	12.7469	14.7054	16.2656	15.7278	15.1768
DNA-Genome-Picea-abies-GCA_900067695.1-2016-11-09.one_line	11960690255	125	3	CTG_123	18625	23.2859	23.2698	24.3007	26.5342	26.4698	25.6054	25.7503
DNA-Genome-Picea-abies-GCA_900067695.1-2016-11-09.one_line	11960690255	125	3	AT_11	17125	6.3766	6.6861	6.8204	8.1285	8.5606	8.1285	8.1518
DNA-Genome-Picea-abies-GCA_900067695.1-2016-11-09.one_line	11960690255	125	3	CAG_123	8125	24.4431	24.32	25.6246	27.8031	29.12	27.4092	27.7662
DNA-Genome-Picea-abies-GCA_900067695.1-2016-11-09.one_line	11960690255	125	3	GTC_123	6375	24.8784	24.6275	26.1647	28.7529	30.3059	28.5176	28.8627
DNA-Genome-Picea-abies-GCA_900067695.1-2016-11-09.one_line	11960690255	125	3	CGT_123	2875	26.1565	25.5652	27.687	29.8435	35.3391	31.687	32.8348
DNA-Genome-Picea-abies-GCA_900067695.1-2016-11-09.one_line	11960690255	125	3	GAN_123	2625	16.2286	16.8762	17.6762	19.581	26.4762	21.0667	21.9429
DNA-Genome-Picea-abies-GCA_900067695.1-2016-11-09.one_line	11960690255	125	3	GAC_133	2375	25.5158	24.9263	26.8632	29.2211	34.7368	30.4421	31.6632
DNA-Genome-Picea-abies-GCA_900067695.1-2016-11-09.one_line	11960690255	125	3	CTN_123	2125	15.8588	16.2353	17.2235	18.7765	27.2	20.6588	21.6471
DNA-Genome-Picea-abies-GCA_900067695.1-2016-11-09.one_line	11960690255	125	3	CAT_133	1875	27.2	27.0933	28.8	31.5733	39.1467	33.7067	35.4133
DNA-Genome-Picea-abies-GCA_900067695.1-2016-11-09.one_line	11960690255	125	3	GCT_123	1750	28.8	27.7714	31.0857	33.0857	41.8286	36.0571	37.9429
DNA-Genome-Picea-abies-GCA_900067695.1-2016-11-09.one_line	11960690255	125	3	AGN_123	1625	18.7692	17.6615	20.1846	21.4154	32.7385	23.7538	25.3538
DNA-Genome-Picea-abies-GCA_900067695.1-2016-11-09.one_line	11960690255	125	3	ACG_122	1500	11.8	11.5333	13.8667	13.9333	22.8667	15.1333	17.0667
DNA-Genome-Picea-abies-GCA_900067695.1-2016-11-09.one_line	11960690255	125	3	CT_11	1375	11.7091	12	14.1091	14.3273	22.6182	14.9091	17.4545
DNA-Genome-Picea-abies-GCA_900067695.1-2016-11-09.one_line	11960690255	125	3	TCG_122	1250	13.84	13.68	15.84	16.16	28.32	17.04	19.52
DNA-Genome-Picea-abies-GCA_900067695.1-2016-11-09.one_line	11960690255	125	3	TCN_123	1000	17.8	16.1	18.8	18.3	35.4	22.3	25.2
DNA-Genome-Picea-abies-GCA_900067695.1-2016-11-09.one_line	11960690255	125	3	AC_11	1000	5.1	3.3	8.4	6.2	18.9	6.7	10
DNA-Genome-Picea-abies-GCA_900067695.1-2016-11-09.one_line	11960690255	125	3	ACN_123	875	16.1143	14.4	17.6	16.9143	35.0857	21.8286	23.7714
DNA-Genome-Picea-abies-GCA_900067695.1-2016-11-09.one_line	11960690255	125	3	AG_11	875	12.1143	12.1143	15.5429	14.0571	28.2286	16.1143	19.6571
DNA-Genome-Picea-abies-GCA_900067695.1-2016-11-09.one_line	11960690255	125	3	TG_11	375	11.4667	5.0667	17.6	12.2667	44	12.8	21.3333
DNA-Genome-Picea-abies-GCA_900067695.1-2016-11-09.one_line	11960690255	125	3	GAC_122	375	23.4667	16.2667	29.3333	24.5333	53.0667	25.3333	34.1333
DNA-Genome-Picea-abies-GCA_900067695.1-2016-11-09.one_line	11960690255	125	3	TGN_123	375	26.1333	20.5333	29.8667	26.6667	66.4	31.2	39.4667
DNA-Genome-Picea-abies-GCA_900067695.1-2016-11-09.one_line	11960690255	125	3	CTG_122	250	31.6	21.6	40	33.6	76.4	34.4	48
DNA-Genome-Picea-abies-GCA_900067695.1-2016-11-09.one_line	11960690255	125	3	GTN_123	125	48.8	29.6	64	48.8	142.4	53.6	76.8
DNA-Genome-Picea-abies-GCA_900067695.1-2016-11-09.one_line	11960690255	125	3	CAN_123	125	49.6	25.6	64	49.6	140.8	53.6	76.8
DNA-Genome-Picea-abies-GCA_900067695.1-2016-11-09.one_line	11960690255	125	3	ATN_122	125	45.6	28	60.8	51.2	135.2	48	70.4
DNA-Genome-Picea-abies-GCA_900067695.1-2016-11-09.one_line	11960690255	150	3	ACT_222	6768254855	23.7873	20.9123	23.6569	26.9652	17.9887	20.731	20.7617
DNA-Genome-Picea-abies-GCA_900067695.1-2016-11-09.one_line	11960690255	150	3	TAC_123	2142096300	22.7201	21.7016	22.8556	26.307	19.3824	21.5914	21.582
DNA-Genome-Picea-abies-GCA_900067695.1-2016-11-09.one_line	11960690255	150	3	ATC_123	2064011250	22.7215	21.7095	22.867	26.3065	19.3968	21.6085	21.6091
DNA-Genome-Picea-abies-GCA_900067695.1-2016-11-09.one_line	11960690255	150	3	TCA_123	303323700	21.2034	19.084	20.9509	25.7839	16.7944	18.854	18.798
DNA-Genome-Picea-abies-GCA_900067695.1-2016-11-09.one_line	11960690255	150	3	AGC_123	270437550	21.3009	19.2022	21.0937	25.782	16.9435	18.9583	18.9078
DNA-Genome-Picea-abies-GCA_900067695.1-2016-11-09.one_line	11960690255	150	3	ACT_123	160978650	20.8505	18.9164	20.5893	25.5393	16.8213	18.9129	18.7939
DNA-Genome-Picea-abies-GCA_900067695.1-2016-11-09.one_line	11960690255	150	3	TGA_123	135519300	20.8287	18.888	20.5475	25.4357	16.8589	18.8624	18.7441
DNA-Genome-Picea-abies-GCA_900067695.1-2016-11-09.one_line	11960690255	150	3	CTA_123	37239300	18.984	17.6298	18.8282	23.9513	16.6823	17.7146	17.524
DNA-Genome-Picea-abies-GCA_900067695.1-2016-11-09.one_line	11960690255	150	3	GAC_123	28283550	19.6739	18.3573	19.4349	24.5395	17.472	18.1958	18.0628
DNA-Genome-Picea-abies-GCA_900067695.1-2016-11-09.one_line	11960690255	150	3	CAT_123	14669250	17.5053	16.5084	17.6091	23.1934	15.9259	16.378	16.0508
DNA-Genome-Picea-abies-GCA_900067695.1-2016-11-09.one_line	11960690255	150	3	ATG_222	12655500	22.5021	21.4622	22.6864	26.539	20.843	20.9579	20.8719
DNA-Genome-Picea-abies-GCA_900067695.1-2016-11-09.one_line	11960690255	150	3	GTA_123	10857600	18.3415	17.4042	18.4444	23.524	16.622	16.9213	16.6446
DNA-Genome-Picea-abies-GCA_900067695.1-2016-11-09.one_line	11960690255	150	3	ATG_123	2672550	21.8831	21.0842	22.2327	25.1763	21.1234	21.0927	21.034
DNA-Genome-Picea-abies-GCA_900067695.1-2016-11-09.one_line	11960690255	150	3	TAG_123	2657700	21.8883	21.1011	22.2394	25.2435	21.2173	21.1951	21.1213
DNA-Genome-Picea-abies-GCA_900067695.1-2016-11-09.one_line	11960690255	150	3	CTG_222	1328850	23.2997	22.6168	23.5253	25.9455	22.1697	22.1449	22.1229
DNA-Genome-Picea-abies-GCA_900067695.1-2016-11-09.one_line	11960690255	150	3	ACG_222	1191450	23.3173	22.6724	23.5641	25.8885	22.2714	22.2664	22.226
DNA-Genome-Picea-abies-GCA_900067695.1-2016-11-09.one_line	11960690255	150	3	CGA_123	1035150	17.1756	16.4758	17.2414	19.4614	16.0525	16.2603	16.0421
DNA-Genome-Picea-abies-GCA_900067695.1-2016-11-09.one_line	11960690255	150	3	GCA_123	879600	17.6785	17.033	17.7597	19.4185	16.4987	16.7075	16.4898
DNA-Genome-Picea-abies-GCA_900067695.1-2016-11-09.one_line	11960690255	150	3	AGT_123	636150	22.0538	21.3112	22.4607	24.7167	21.4739	21.3571	21.3321
DNA-Genome-Picea-abies-GCA_900067695.1-2016-11-09.one_line	11960690255	150	3	CAT_122	268650	14.5699	16.7344	15.0195	17.9966	16.2483	16.1485	16.14
DNA-Genome-Picea-abies-GCA_900067695.1-2016-11-09.one_line	11960690255	150	3	ACT_122	215550	15.5876	15.8404	16.0213	18.6657	16.6732	16.6736	16.6254
DNA-Genome-Picea-abies-GCA_900067695.1-2016-11-09.one_line	11960690255	150	3	TAG_122	204750	15.5551	15.623	15.9687	18.5143	16.4801	16.4078	16.3829
DNA-Genome-Picea-abies-GCA_900067695.1-2016-11-09.one_line	11960690255	150	3	GAT_122	170100	14.6961	16.6414	15.0958	18.1675	16.592	16.438	16.5079
DNA-Genome-Picea-abies-GCA_900067695.1-2016-11-09.one_line	11960690255	150	3	TAC_133	166650	22.3108	22.3396	22.7867	25.0225	22.5125	22.2652	22.3366
DNA-Genome-Picea-abies-GCA_900067695.1-2016-11-09.one_line	11960690255	150	3	ACT_133	159900	22.2695	22.1132	22.738	24.8893	22.3996	22.2683	22.2714
DNA-Genome-Picea-abies-GCA_900067695.1-2016-11-09.one_line	11960690255	150	3	TCG_123	158850	22.741	22.5269	23.2635	25.5858	23.2137	22.9896	23.0179
DNA-Genome-Picea-abies-GCA_900067695.1-2016-11-09.one_line	11960690255	150	3	TAC_122	129900	16.2956	16.1293	16.7467	19.2479	17.3195	17.1909	17.1732
DNA-Genome-Picea-abies-GCA_900067695.1-2016-11-09.one_line	11960690255	150	3	ATG_122	123750	16.2699	16.3564	16.716	19.4077	17.6178	17.4457	17.4158
DNA-Genome-Picea-abies-GCA_900067695.1-2016-11-09.one_line	11960690255	150	3	GAT_123	99450	21.6149	21.8964	22.3228	24.918	23.28	22.9271	22.9341
DNA-Genome-Picea-abies-GCA_900067695.1-2016-11-09.one_line	11960690255	150	3	ACG_123	94500	22.927	22.3545	23.4899	25.7037	23.4423	23.1619	23.1365
DNA-Genome-Picea-abies-GCA_900067695.1-2016-11-09.one_line	11960690255	150	3	TGC_123	91200	22.8794	22.3026	23.4145	25.6327	23.3289	23.1711	23.193
DNA-Genome-Picea-abies-GCA_900067695.1-2016-11-09.one_line	11960690255	150	3	CTG_123	18000	23.4444	23.1556	24.3222	26.6444	26.4667	25.4	25.6444
DNA-Genome-Picea-abies-GCA_900067695.1-2016-11-09.one_line	11960690255	150	3	ATN_123	16500	12.5333	13.4909	13.3939	15.5212	17.1758	16.4	15.9273
DNA-Genome-Picea-abies-GCA_900067695.1-2016-11-09.one_line	11960690255	150	3	TAN_123	16500	12.3758	13.4485	13.2121	15.4303	17.3455	16.3455	15.8788
DNA-Genome-Picea-abies-GCA_900067695.1-2016-11-09.one_line	11960690255	150	3	GTC_123	6600	24.8333	24.9394	26.0909	28.4394	30.4091	28.5152	29.0303
DNA-Genome-Picea-abies-GCA_900067695.1-2016-11-09.one_line	11960690255	150	3	CAG_123	5400	25.0741	24.4259	26.3333	28.6296	30.2963	28.3519	28.8148
DNA-Genome-Picea-abies-GCA_900067695.1-2016-11-09.one_line	11960690255	150	3	AT_11	3600	10.2778	10.1389	11.4444	12.8611	15.4722	12.5556	13.5556
DNA-Genome-Picea-abies-GCA_900067695.1-2016-11-09.one_line	11960690255	150	3	CAT_133	1800	27.3333	27.1667	29.2222	31.1111	39.5	33.8889	35.5556
DNA-Genome-Picea-abies-GCA_900067695.1-2016-11-09.one_line	11960690255	150	3	CGT_123	1800	28.2222	28.0556	30.2222	31.8333	41.6111	36.0556	37.7778
DNA-Genome-Picea-abies-GCA_900067695.1-2016-11-09.one_line	11960690255	150	3	GAC_133	1500	27.7333	27.1333	29.3333	30.8667	41.4667	34.5333	36.8
DNA-Genome-Picea-abies-GCA_900067695.1-2016-11-09.one_line	11960690255	150	3	GAN_123	1500	17.8	18.2667	20.1333	21.9333	33.1333	23.6	25.0667
DNA-Genome-Picea-abies-GCA_900067695.1-2016-11-09.one_line	11960690255	150	3	CTN_123	1200	20	19.5	22.3333	23.9167	36.5833	25.9167	28.3333
DNA-Genome-Picea-abies-GCA_900067695.1-2016-11-09.one_line	11960690255	150	3	GCT_123	1200	29.8333	28.8333	32.3333	33.1667	46.1667	37.5833	40.3333
DNA-Genome-Picea-abies-GCA_900067695.1-2016-11-09.one_line	11960690255	150	3	AG_11	450	18.2222	16.8889	24	21.7778	46.4444	23.3333	31.1111
DNA-Genome-Picea-abies-GCA_900067695.1-2016-11-09.one_line	11960690255	150	3	AGN_123	450	27.1111	20.6667	31.5556	30.2222	62.4444	34.4444	40.8889
DNA-Genome-Picea-abies-GCA_900067695.1-2016-11-09.one_line	11960690255	150	3	TCG_122	450	19.3333	18.2222	24.4444	22.6667	50.4444	24.4444	32
DNA-Genome-Picea-abies-GCA_900067695.1-2016-11-09.one_line	11960690255	150	3	ACG_122	450	20.8889	18.4444	25.3333	23.3333	49.5556	24.6667	32
DNA-Genome-Picea-abies-GCA_900067695.1-2016-11-09.one_line	11960690255	150	3	CT_11	450	16.8889	14.6667	22.6667	20.2222	43.5556	20.8889	27.5556
DNA-Genome-Picea-abies-GCA_900067695.1-2016-11-09.one_line	11960690255	150	3	TCN_123	300	31.3333	25.3333	38	35.3333	77.3333	37.6667	48
DNA-Genome-Picea-abies-GCA_900067695.1-2016-11-09.one_line	11960690255	150	3	AC_11	300	14.6667	7	23.3333	16.3333	56	17	28
DNA-Genome-Picea-abies-GCA_900067695.1-2016-11-09.one_line	11960690255	150	3	TG_11	150	27.3333	10	42.6667	29.3333	105.333	30	50.6667
DNA-Genome-Picea-abies-GCA_900067695.1-2016-11-09.one_line	11960690255	150	3	CTG_122	150	44.6667	26.6667	56	46.6667	116.667	47.3333	69.3333
DNA-Genome-Picea-abies-GCA_900067695.1-2016-11-09.one_line	11960690255	250	3	ACT_222	7225542755	23.7638	20.6479	23.6379	26.9578	17.6868	20.5228	20.5542
DNA-Genome-Picea-abies-GCA_900067695.1-2016-11-09.one_line	11960690255	250	3	TAC_123	2071455250	22.7949	21.5115	22.908	26.356	19.0616	21.3768	21.3626
DNA-Genome-Picea-abies-GCA_900067695.1-2016-11-09.one_line	11960690255	250	3	ATC_123	2013744750	22.8012	21.5405	22.9267	26.3544	19.0775	21.3986	21.3971
DNA-Genome-Picea-abies-GCA_900067695.1-2016-11-09.one_line	11960690255	250	3	TCA_123	211838250	20.8712	18.2577	20.5282	25.6293	15.9489	17.9527	17.8674
DNA-Genome-Picea-abies-GCA_900067695.1-2016-11-09.one_line	11960690255	250	3	AGC_123	188378500	20.9793	18.3834	20.6876	25.6442	16.0858	18.0301	17.9524
DNA-Genome-Picea-abies-GCA_900067695.1-2016-11-09.one_line	11960690255	250	3	ACT_123	88014500	20.4021	17.9476	20.1112	25.2662	16.0584	17.9586	17.7905
DNA-Genome-Picea-abies-GCA_900067695.1-2016-11-09.one_line	11960690255	250	3	TGA_123	75637500	20.4608	18.0157	20.042	25.1978	16.2056	17.9602	17.7993
DNA-Genome-Picea-abies-GCA_900067695.1-2016-11-09.one_line	11960690255	250	3	CTA_123	23380500	18.4869	17.525	18.2172	23.3411	16.7539	17.4163	17.2018
DNA-Genome-Picea-abies-GCA_900067695.1-2016-11-09.one_line	11960690255	250	3	ATG_222	21559250	22.7372	20.9254	22.4471	26.6485	20.0588	20.469	20.3955
DNA-Genome-Picea-abies-GCA_900067695.1-2016-11-09.one_line	11960690255	250	3	GAC_123	16437750	19.0581	18.3617	19.2609	24.0067	17.5891	17.9185	17.7832
DNA-Genome-Picea-abies-GCA_900067695.1-2016-11-09.one_line	11960690255	250	3	CAT_123	6373250	16.9993	15.5752	17.0836	21.7958	14.9595	15.3292	14.9556
DNA-Genome-Picea-abies-GCA_900067695.1-2016-11-09.one_line	11960690255	250	3	GTA_123	4639250	17.8291	16.2331	17.9076	22.1801	15.5078	15.8123	15.503
DNA-Genome-Picea-abies-GCA_900067695.1-2016-11-09.one_line	11960690255	250	3	ATG_123	4623750	21.8495	20.9214	22.1668	25.445	20.6119	20.646	20.5348
DNA-Genome-Picea-abies-GCA_900067695.1-2016-11-09.one_line	11960690255	250	3	TAG_123	4355750	22.0809	21.3121	22.4208	25.5746	21.1205	21.1415	21.0452
DNA-Genome-Picea-abies-GCA_900067695.1-2016-11-09.one_line	11960690255	250	3	CTG_222	1453500	23.2843	22.5372	23.4784	25.868	21.8248	21.8091	21.7827
DNA-Genome-Picea-abies-GCA_900067695.1-2016-11-09.one_line	11960690255	250	3	ACG_222	1288500	23.2697	22.5218	23.4912	25.8119	21.8311	21.8368	21.7962
DNA-Genome-Picea-abies-GCA_900067695.1-2016-11-09.one_line	11960690255	250	3	AGT_123	778000	22.1276	21.5174	22.5224	24.7174	21.2125	21.1469	21.0972
DNA-Genome-Picea-abies-GCA_900067695.1-2016-11-09.one_line	11960690255	250	3	CGA_123	273500	18.3824	16.6823	18.4812	20.0618	16.3876	16.5232	16.3364
DNA-Genome-Picea-abies-GCA_900067695.1-2016-11-09.one_line	11960690255	250	3	GCA_123	221000	18.8357	17.0638	18.9113	20.5032	16.691	16.7805	16.6534
DNA-Genome-Picea-abies-GCA_900067695.1-2016-11-09.one_line	11960690255	250	3	TCG_123	173000	22.9058	22.8555	23.385	25.6486	22.9699	22.7942	22.7884
DNA-Genome-Picea-abies-GCA_900067695.1-2016-11-09.one_line	11960690255	250	3	GAT_123	96250	20.9579	21.919	21.6478	24.319	23.0255	22.6691	22.7699
DNA-Genome-Picea-abies-GCA_900067695.1-2016-11-09.one_line	11960690255	250	3	ACG_123	86250	23.2359	23.1664	23.8122	26.0835	24.1809	23.709	23.8145
DNA-Genome-Picea-abies-GCA_900067695.1-2016-11-09.one_line	11960690255	250	3	TGC_123	83750	23.1487	23.0436	23.7278	25.846	23.797	23.4412	23.5606
DNA-Genome-Picea-abies-GCA_900067695.1-2016-11-09.one_line	11960690255	250	3	TAC_133	75750	22.6455	22.5399	23.1947	25.237	23.0191	22.8884	22.8964
DNA-Genome-Picea-abies-GCA_900067695.1-2016-11-09.one_line	11960690255	250	3	ACT_133	71750	22.7875	22.7624	23.3951	25.5805	23.6544	23.3226	23.4815
DNA-Genome-Picea-abies-GCA_900067695.1-2016-11-09.one_line	11960690255	250	3	CAT_122	29750	15.1059	17.4387	15.758	18.6756	18.4437	17.8487	18.0571
DNA-Genome-Picea-abies-GCA_900067695.1-2016-11-09.one_line	11960690255	250	3	GAT_122	20250	15.1012	17.2395	15.8617	18.7901	19.0914	18.3901	18.5679
DNA-Genome-Picea-abies-GCA_900067695.1-2016-11-09.one_line	11960690255	250	3	CTG_123	13500	23.5852	23.6593	24.4444	26.6074	26.9926	26.037	26.3407
DNA-Genome-Picea-abies-GCA_900067695.1-2016-11-09.one_line	11960690255	250	3	TAG_122	11250	16.0978	15.0844	17.0311	18.9067	18.4978	17.3067	17.6
DNA-Genome-Picea-abies-GCA_900067695.1-2016-11-09.one_line	11960690255	250	3	ACT_122	8250	16.2667	14.7515	17.3818	19.3455	18.8242	17.3333	17.7939
DNA-Genome-Picea-abies-GCA_900067695.1-2016-11-09.one_line	11960690255	250	3	TAC_122	7000	16.1429	14.4	17.0286	19.1286	19.6714	17.7571	18.1143
DNA-Genome-Picea-abies-GCA_900067695.1-2016-11-09.one_line	11960690255	250	3	ATG_122	4500	18.0222	15.6	19.1111	20.9333	21.5556	19.3556	19.9111
DNA-Genome-Picea-abies-GCA_900067695.1-2016-11-09.one_line	11960690255	250	3	CAG_123	3750	25.4933	24.08	26.6667	28.4	31.7333	28.5867	29.44
DNA-Genome-Picea-abies-GCA_900067695.1-2016-11-09.one_line	11960690255	250	3	GTC_123	3750	25.7067	24.8533	27.0933	29.12	32.56	29.8133	30.2933
DNA-Genome-Picea-abies-GCA_900067695.1-2016-11-09.one_line	11960690255	250	3	ATN_123	1750	17.2571	17.1429	19.2	21.2	31.2	22.6286	24.2286
DNA-Genome-Picea-abies-GCA_900067695.1-2016-11-09.one_line	11960690255	250	3	CGT_123	1500	28.1333	27.1333	30.1333	31.6	41.6	34.6667	36.8
DNA-Genome-Picea-abies-GCA_900067695.1-2016-11-09.one_line	11960690255	250	3	GCT_123	1000	31	29.5	33.8	35	50	39.5	42.8
DNA-Genome-Picea-abies-GCA_900067695.1-2016-11-09.one_line	11960690255	250	3	GAN_123	500	25.8	23.6	30.8	31.4	53.6	32.8	39.2
DNA-Genome-Picea-abies-GCA_900067695.1-2016-11-09.one_line	11960690255	250	3	TAN_123	500	23.6	20	28.4	29	54.4	30.2	36.8
DNA-Genome-Picea-abies-GCA_900067695.1-2016-11-09.one_line	11960690255	250	3	GAC_122	250	27.2	24.8	38.4	31.2	76	34.4	48
DNA-Genome-Picea-abies-GCA_900067695.1-2016-11-09.one_line	11960690255	250	3	AT_11	250	23.6	14.8	32	25.2	66.4	24.8	38.4
DNA-Genome-Picea-abies-GCA_900067695.1-2016-11-09.one_line	11960690255	250	3	CAT_133	250	46	34	55.2	48.8	100.4	58.8	72
DNA-Genome-Picea-abies-GCA_900067695.1-2016-11-09.one_line	11960690255	500	3	ACT_222	7902182255	23.7359	20.4536	23.6254	26.9415	17.5015	20.4305	20.4629
DNA-Genome-Picea-abies-GCA_900067695.1-2016-11-09.one_line	11960690255	500	3	TAC_123	1868567000	22.922	21.5719	23.0457	26.4197	19.0098	21.3549	21.3541
DNA-Genome-Picea-abies-GCA_900067695.1-2016-11-09.one_line	11960690255	500	3	ATC_123	1826054500	22.9374	21.6129	23.0722	26.4177	19.0442	21.3892	21.3832
DNA-Genome-Picea-abies-GCA_900067695.1-2016-11-09.one_line	11960690255	500	3	TCA_123	115913500	20.4043	17.5154	20.0667	25.3811	15.3605	17.0802	16.9715
DNA-Genome-Picea-abies-GCA_900067695.1-2016-11-09.one_line	11960690255	500	3	AGC_123	102511500	20.4958	17.613	20.1348	25.4007	15.4599	17.0923	16.9953
DNA-Genome-Picea-abies-GCA_900067695.1-2016-11-09.one_line	11960690255	500	3	ATG_222	43893500	22.8831	20.4612	22.6993	26.7416	19.0043	20.081	20.0052
DNA-Genome-Picea-abies-GCA_900067695.1-2016-11-09.one_line	11960690255	500	3	ACT_123	32497000	19.7788	17.3553	19.5952	24.821	16.1835	17.1958	17.0052
DNA-Genome-Picea-abies-GCA_900067695.1-2016-11-09.one_line	11960690255	500	3	TGA_123	28794000	19.9423	17.4995	19.5016	24.7794	16.3609	17.2365	17.0498
DNA-Genome-Picea-abies-GCA_900067695.1-2016-11-09.one_line	11960690255	500	3	CTA_123	10831500	18.3199	18.5143	18.5613	22.6368	17.8701	18.0542	17.8989
DNA-Genome-Picea-abies-GCA_900067695.1-2016-11-09.one_line	11960690255	500	3	ATG_123	8849000	21.9263	20.8439	22.2056	25.8188	20.1771	20.2485	20.1301
DNA-Genome-Picea-abies-GCA_900067695.1-2016-11-09.one_line	11960690255	500	3	TAG_123	7237000	22.4564	21.9363	22.7885	26.0037	21.4225	21.4436	21.3789
DNA-Genome-Picea-abies-GCA_900067695.1-2016-11-09.one_line	11960690255	500	3	GAC_123	7026000	19.1649	19.5109	19.4294	23.1917	18.6285	18.7149	18.6413
DNA-Genome-Picea-abies-GCA_900067695.1-2016-11-09.one_line	11960690255	500	3	CTG_222	1529000	23.1165	22.0729	23.2866	25.6878	21.0126	21.0225	20.9787
DNA-Genome-Picea-abies-GCA_900067695.1-2016-11-09.one_line	11960690255	500	3	ACG_222	1384500	23.0651	22.0665	23.2582	25.6203	21.0737	21.0924	21.0196
DNA-Genome-Picea-abies-GCA_900067695.1-2016-11-09.one_line	11960690255	500	3	CAT_123	1127500	17.7124	15.4243	17.7735	20.0276	14.8622	15.1236	14.8527
DNA-Genome-Picea-abies-GCA_900067695.1-2016-11-09.one_line	11960690255	500	3	AGT_123	950500	22.1482	21.4207	22.4926	24.7752	20.5871	20.5685	20.4595
DNA-Genome-Picea-abies-GCA_900067695.1-2016-11-09.one_line	11960690255	500	3	GTA_123	821000	18.6056	16.0629	18.6646	20.2333	15.379	15.5479	15.3505
DNA-Genome-Picea-abies-GCA_900067695.1-2016-11-09.one_line	11960690255	500	3	TCG_123	173000	22.9549	22.7965	23.3676	25.5659	22.3052	21.9908	22.2173
DNA-Genome-Picea-abies-GCA_900067695.1-2016-11-09.one_line	11960690255	500	3	GAT_123	97000	20.3041	21.733	20.9402	23.733	22.5474	22.1938	22.2804
DNA-Genome-Picea-abies-GCA_900067695.1-2016-11-09.one_line	11960690255	500	3	TGC_123	68500	23.3504	23.8715	23.9358	26.1504	24.692	24.4569	24.5839
DNA-Genome-Picea-abies-GCA_900067695.1-2016-11-09.one_line	11960690255	500	3	ACG_123	66000	23.2576	23.5848	23.8394	26.1197	24.4136	24.0167	24.1636
DNA-Genome-Picea-abies-GCA_900067695.1-2016-11-09.one_line	11960690255	500	3	GCA_123	46000	18.2457	15.0913	18.2391	19.6674	16.0174	15.6109	15.8087
DNA-Genome-Picea-abies-GCA_900067695.1-2016-11-09.one_line	11960690255	500	3	CGA_123	35000	18.4171	14.2486	18.4	19.8057	16.0943	15.8457	15.8857
DNA-Genome-Picea-abies-GCA_900067695.1-2016-11-09.one_line	11960690255	500	3	ACT_133	12000	24.0833	25.775	25.1667	27.325	28.4333	27.5	27.8
DNA-Genome-Picea-abies-GCA_900067695.1-2016-11-09.one_line	11960690255	500	3	TAC_133	10500	24.1429	25.9048	25.1238	27.3714	28.9619	28.2476	28.1524
DNA-Genome-Picea-abies-GCA_900067695.1-2016-11-09.one_line	11960690255	500	3	CTG_123	10500	23.3524	22.1429	23.5238	26.0476	25.7714	24.7619	25.1048
DNA-Genome-Picea-abies-GCA_900067695.1-2016-11-09.one_line	11960690255	500	3	TAC_122	1000	12.3	10.3	13.6	13	26	13.8	16.8
DNA-Genome-Picea-abies-GCA_900067695.1-2016-11-09.one_line	11960690255	500	3	CAG_123	500	35.6	24.4	38	37.4	59.8	39	45.6
DNA-Genome-Picea-abies-GCA_900067695.1-2016-11-09.one_line	11960690255	500	3	GTC_123	500	35.8	32.6	40	39.6	67.2	46.6	52.8
DNA-Genome-Picea-abies-GCA_900067695.1-2016-11-09.one_line	11960690255	500	3	CGT_123	500	34	27.4	37.6	37.2	61	40.6	47.2
DNA-Genome-Picea-abies-GCA_900067695.1-2016-11-09.one_line	11960690255	750	3	ACT_222	8303217755	23.722	20.4238	23.6231	26.9302	17.486	20.446	20.4786
DNA-Genome-Picea-abies-GCA_900067695.1-2016-11-09.one_line	11960690255	750	3	TAC_123	1709623500	22.9917	21.6804	23.1292	26.4512	19.0962	21.409	21.4082
DNA-Genome-Picea-abies-GCA_900067695.1-2016-11-09.one_line	11960690255	750	3	ATC_123	1671309750	23.0135	21.7265	23.1596	26.4469	19.1431	21.4692	21.4716
DNA-Genome-Picea-abies-GCA_900067695.1-2016-11-09.one_line	11960690255	750	3	TCA_123	75977250	20.304	17.3021	19.9024	25.2813	15.3637	16.7901	16.6945
DNA-Genome-Picea-abies-GCA_900067695.1-2016-11-09.one_line	11960690255	750	3	AGC_123	67663500	20.3004	17.3438	20.0242	25.2945	15.4043	16.7296	16.642
DNA-Genome-Picea-abies-GCA_900067695.1-2016-11-09.one_line	11960690255	750	3	ATG_222	66072750	22.9744	20.367	22.8519	26.7814	18.46	20.0087	19.9691
DNA-Genome-Picea-abies-GCA_900067695.1-2016-11-09.one_line	11960690255	750	3	ACT_123	16596750	19.1504	17.0713	19.2388	24.46	16.2532	16.7174	16.5118
DNA-Genome-Picea-abies-GCA_900067695.1-2016-11-09.one_line	11960690255	750	3	TGA_123	14974500	19.3043	17.2083	19.3623	24.4172	16.3664	16.7562	16.5461
DNA-Genome-Picea-abies-GCA_900067695.1-2016-11-09.one_line	11960690255	750	3	ATG_123	12362250	21.9296	20.7713	22.1848	25.9578	19.9514	20.0991	19.9834
DNA-Genome-Picea-abies-GCA_900067695.1-2016-11-09.one_line	11960690255	750	3	TAG_123	9352500	22.6416	22.2635	22.9671	26.1862	21.5997	21.6198	21.576
DNA-Genome-Picea-abies-GCA_900067695.1-2016-11-09.one_line	11960690255	750	3	CTA_123	5699250	17.9094	18.5756	18.1793	21.7745	18.2167	18.3633	18.2093
DNA-Genome-Picea-abies-GCA_900067695.1-2016-11-09.one_line	11960690255	750	3	GAC_123	3428250	18.502	18.9117	18.7968	22.0251	18.8951	18.9673	18.9004
DNA-Genome-Picea-abies-GCA_900067695.1-2016-11-09.one_line	11960690255	750	3	CTG_222	1398000	23.1162	21.8379	23.2549	25.6307	20.6725	20.676	20.671
DNA-Genome-Picea-abies-GCA_900067695.1-2016-11-09.one_line	11960690255	750	3	ACG_222	1303500	23.0341	21.9622	23.2112	25.5546	20.8175	20.8499	20.7985
DNA-Genome-Picea-abies-GCA_900067695.1-2016-11-09.one_line	11960690255	750	3	AGT_123	957750	22.2801	21.5117	22.5986	24.9338	20.4186	20.366	20.3598
DNA-Genome-Picea-abies-GCA_900067695.1-2016-11-09.one_line	11960690255	750	3	CAT_123	219000	20.1913	17.753	20.3233	22.0584	17.3571	17.3836	17.3059
DNA-Genome-Picea-abies-GCA_900067695.1-2016-11-09.one_line	11960690255	750	3	TCG_123	171000	22.9959	22.5351	23.3626	25.5287	21.7988	21.493	21.6327
DNA-Genome-Picea-abies-GCA_900067695.1-2016-11-09.one_line	11960690255	750	3	GTA_123	153000	21.4477	19.2915	21.6144	23.4948	18.8569	18.7739	18.7869
DNA-Genome-Picea-abies-GCA_900067695.1-2016-11-09.one_line	11960690255	750	3	GAT_123	89250	19.6246	20.8549	20.2331	22.7373	21.5081	21.098	21.3244
DNA-Genome-Picea-abies-GCA_900067695.1-2016-11-09.one_line	11960690255	750	3	ACG_123	48750	23.1138	23.2513	23.6103	25.8256	24.1538	23.6062	23.8523
DNA-Genome-Picea-abies-GCA_900067695.1-2016-11-09.one_line	11960690255	750	3	TGC_123	43500	23.308	23.6598	23.8345	26.0621	24.7954	24.3011	24.4138
DNA-Genome-Picea-abies-GCA_900067695.1-2016-11-09.one_line	11960690255	750	3	GCA_123	8250	17.9273	13.503	17.4061	19.2121	18.3394	16.8364	17.1152
DNA-Genome-Picea-abies-GCA_900067695.1-2016-11-09.one_line	11960690255	750	3	CGA_123	6750	15.6444	10.8296	13.0074	16.6963	15.0074	13.4519	13.9852
DNA-Genome-Picea-abies-GCA_900067695.1-2016-11-09.one_line	11960690255	750	3	CTG_123	4500	22.1778	20.5111	22.7111	24.4889	26.1556	23.8889	24.6222
DNA-Genome-Picea-abies-GCA_900067695.1-2016-11-09.one_line	11960690255	750	3	ACT_133	4500	25.2222	26.6889	26.5778	28.6444	32.1111	30.2444	30.5778
DNA-Genome-Picea-abies-GCA_900067695.1-2016-11-09.one_line	11960690255	750	3	TAC_133	3750	25.4133	26.8	26.9333	28.8533	33.52	31.1733	31.5733
DNA-Genome-Picea-abies-GCA_900067695.1-2016-11-09.one_line	11960690255	750	3	CGT_123	750	32.2667	28.1333	34.6667	35.4667	53.2	39.3333	43.7333
DNA-Genome-Picea-abies-GCA_900067695.1-2016-11-09.one_line	11960690255	1000	3	ACT_222	8583814255	23.7154	20.4278	23.6263	26.9222	17.5154	20.4769	20.5098
DNA-Genome-Picea-abies-GCA_900067695.1-2016-11-09.one_line	11960690255	1000	3	TAC_123	1585343000	23.0399	21.7801	23.1885	26.4712	19.1886	21.4866	21.4815
DNA-Genome-Picea-abies-GCA_900067695.1-2016-11-09.one_line	11960690255	1000	3	ATC_123	1551208000	23.0624	21.8263	23.2188	26.4659	19.2415	21.5275	21.535
DNA-Genome-Picea-abies-GCA_900067695.1-2016-11-09.one_line	11960690255	1000	3	ATG_222	87061000	23.1219	20.3642	22.9549	26.8077	18.1423	20.0104	19.9621
DNA-Genome-Picea-abies-GCA_900067695.1-2016-11-09.one_line	11960690255	1000	3	TCA_123	52909000	20.1758	17.292	19.7771	25.1746	15.5943	16.6921	16.6089
DNA-Genome-Picea-abies-GCA_900067695.1-2016-11-09.one_line	11960690255	1000	3	AGC_123	47420000	20.2338	17.2882	19.8808	25.1799	15.6191	16.6202	16.5433
DNA-Genome-Picea-abies-GCA_900067695.1-2016-11-09.one_line	11960690255	1000	3	ATG_123	15331000	21.9482	20.7417	22.1937	26.0498	19.8367	20.0646	19.9704
DNA-Genome-Picea-abies-GCA_900067695.1-2016-11-09.one_line	11960690255	1000	3	TAG_123	11384000	22.7624	22.4681	23.0798	26.2931	21.6896	21.743	21.7095
DNA-Genome-Picea-abies-GCA_900067695.1-2016-11-09.one_line	11960690255	1000	3	ACT_123	8727000	19.6204	17.6051	19.7172	24.2187	16.7628	16.9493	16.7625
DNA-Genome-Picea-abies-GCA_900067695.1-2016-11-09.one_line	11960690255	1000	3	TGA_123	7958000	19.7409	17.7332	19.8061	24.1503	16.862	17.0367	16.8473
DNA-Genome-Picea-abies-GCA_900067695.1-2016-11-09.one_line	11960690255	1000	3	CTA_123	3498000	17.4758	18.1185	17.7362	21.1143	18.0473	18.1782	18.0375
DNA-Genome-Picea-abies-GCA_900067695.1-2016-11-09.one_line	11960690255	1000	3	GAC_123	2052000	17.8641	18.1105	18.1675	21.294	18.4522	18.5098	18.4279
DNA-Genome-Picea-abies-GCA_900067695.1-2016-11-09.one_line	11960690255	1000	3	CTG_222	1341000	22.9549	21.3051	23.0646	25.4486	20.0986	20.072	20.1098
DNA-Genome-Picea-abies-GCA_900067695.1-2016-11-09.one_line	11960690255	1000	3	ACG_222	1297000	22.8167	21.3119	22.9689	25.3604	20.1501	20.1194	20.0981
DNA-Genome-Picea-abies-GCA_900067695.1-2016-11-09.one_line	11960690255	1000	3	AGT_123	901000	22.3625	21.8396	22.6983	24.9718	20.6484	20.5699	20.5789
DNA-Genome-Picea-abies-GCA_900067695.1-2016-11-09.one_line	11960690255	1000	3	TCG_123	152000	22.7625	21.923	23.0855	25.2033	20.7809	20.5382	20.6684
DNA-Genome-Picea-abies-GCA_900067695.1-2016-11-09.one_line	11960690255	1000	3	CAT_123	90000	19.0933	16.1122	19.2667	20.8833	16.7544	16.6511	16.6622
DNA-Genome-Picea-abies-GCA_900067695.1-2016-11-09.one_line	11960690255	1000	3	GAT_123	73000	18.8795	20.1658	19.4685	21.9849	20.8589	20.4836	20.5973
DNA-Genome-Picea-abies-GCA_900067695.1-2016-11-09.one_line	11960690255	1000	3	GTA_123	52000	21.4288	19.2827	21.7038	23.8135	20.3096	19.8538	20.1462
DNA-Genome-Picea-abies-GCA_900067695.1-2016-11-09.one_line	11960690255	1000	3	ACG_123	38000	23.5395	24.0895	24.1474	26.5289	25.3526	24.9447	25.0632
DNA-Genome-Picea-abies-GCA_900067695.1-2016-11-09.one_line	11960690255	1000	3	TGC_123	29000	23.7793	24.6966	24.4276	26.7552	26.4621	26.0241	26.1379
DNA-Genome-Picea-abies-GCA_900067695.1-2016-11-09.one_line	11960690255	1000	3	GCA_123	6000	13.95	11.3	14.3	15.1667	15.55	13.4167	13.8667
DNA-Genome-Picea-abies-GCA_900067695.1-2016-11-09.one_line	11960690255	1000	3	CGA_123	2000	18.8	15.45	18.9	20	25.5	19.9	21.6
DNA-Genome-Picea-abies-GCA_900067695.1-2016-11-09.one_line	11960690255	1000	3	TAC_133	2000	26.85	27	28.6	30.35	38.5	33.55	35
DNA-Genome-Picea-abies-GCA_900067695.1-2016-11-09.one_line	11960690255	1000	3	CTG_123	1000	20.9	13	21	21	30.3	20	23.2
DNA-Genome-Picea-abies-GCA_900067695.1-2016-11-09.one_line	11960690255	1000	3	ACT_133	1000	29.9	27	32.4	33.3	48.3	37.4	40.8
DNA-Genome-Picea-abies-GCA_900067695.1-2016-11-09.one_line	11960690255	2500	3	ACT_222	9426237755	23.7011	20.5194	23.6431	26.9003	17.6577	20.6296	20.6626
DNA-Genome-Picea-abies-GCA_900067695.1-2016-11-09.one_line	11960690255	2500	3	TAC_123	1146282500	23.1795	22.2134	23.3683	26.5218	19.6347	21.7863	21.8009
DNA-Genome-Picea-abies-GCA_900067695.1-2016-11-09.one_line	11960690255	2500	3	ATC_123	1118037500	23.2048	22.1753	23.4048	26.5155	19.7146	21.8798	21.8995
DNA-Genome-Picea-abies-GCA_900067695.1-2016-11-09.one_line	11960690255	2500	3	ATG_222	201090000	23.3832	20.6629	23.2699	26.854	17.8014	20.2414	20.242
DNA-Genome-Picea-abies-GCA_900067695.1-2016-11-09.one_line	11960690255	2500	3	ATG_123	27652500	22.5193	21.2028	22.4772	26.2478	19.9542	20.5212	20.4496
DNA-Genome-Picea-abies-GCA_900067695.1-2016-11-09.one_line	11960690255	2500	3	TAG_123	18785000	23.1063	23.0147	23.3436	26.4804	21.9437	22.1905	22.1741
DNA-Genome-Picea-abies-GCA_900067695.1-2016-11-09.one_line	11960690255	2500	3	TCA_123	10005000	20.5829	18.4483	20.7062	24.9463	17.2363	17.243	17.2335
DNA-Genome-Picea-abies-GCA_900067695.1-2016-11-09.one_line	11960690255	2500	3	AGC_123	8727500	20.6369	17.8512	20.7723	24.9109	17.1677	17.1664	17.1941
DNA-Genome-Picea-abies-GCA_900067695.1-2016-11-09.one_line	11960690255	2500	3	CTG_222	872500	22.0496	19.9932	22.1841	24.1199	18.7166	18.6717	18.648
DNA-Genome-Picea-abies-GCA_900067695.1-2016-11-09.one_line	11960690255	2500	3	ACG_222	842500	21.6177	19.7294	21.7759	23.6567	18.582	18.5938	18.5809
DNA-Genome-Picea-abies-GCA_900067695.1-2016-11-09.one_line	11960690255	2500	3	CTA_123	582500	17.3409	18.0081	17.667	20.1004	17.9821	17.9739	17.955
DNA-Genome-Picea-abies-GCA_900067695.1-2016-11-09.one_line	11960690255	2500	3	AGT_123	502500	22.4754	22.7033	22.7765	25.163	21.3413	21.2981	21.3572
DNA-Genome-Picea-abies-GCA_900067695.1-2016-11-09.one_line	11960690255	2500	3	GAC_123	422500	18.3058	18.2521	18.684	21.1418	18.9484	18.8667	18.9084
DNA-Genome-Picea-abies-GCA_900067695.1-2016-11-09.one_line	11960690255	2500	3	ACT_123	305000	20.4718	20.0731	20.7849	22.9161	19.779	19.7672	19.7574
DNA-Genome-Picea-abies-GCA_900067695.1-2016-11-09.one_line	11960690255	2500	3	TGA_123	265000	20.1611	19.4132	20.4626	22.5291	19.1974	19.1487	19.1004
DNA-Genome-Picea-abies-GCA_900067695.1-2016-11-09.one_line	11960690255	2500	3	GAT_123	40000	19.715	20.3825	20.355	22.7025	21.43	20.88	21.17
DNA-Genome-Picea-abies-GCA_900067695.1-2016-11-09.one_line	11960690255	2500	3	TCG_123	32500	22.7692	22.1262	23.2369	25.3508	22.8892	22.1446	22.8554
DNA-Genome-Picea-abies-GCA_900067695.1-2016-11-09.one_line	11960690255	2500	3	GTA_123	7500	19.9733	21.6267	20.7733	22.8533	24.4667	23.08	23.52
DNA-Genome-Picea-abies-GCA_900067695.1-2016-11-09.one_line	11960690255	5000	3	ACT_222	9971520255	23.6947	20.6126	23.661	26.8849	17.819	20.767	20.8
DNA-Genome-Picea-abies-GCA_900067695.1-2016-11-09.one_line	11960690255	5000	3	TAC_123	792335000	23.2608	22.5269	23.476	26.5464	19.9869	22.0256	22.0639
DNA-Genome-Picea-abies-GCA_900067695.1-2016-11-09.one_line	11960690255	5000	3	ATC_123	768180000	23.2854	22.4891	23.5114	26.5404	20.0797	22.13	22.1549
DNA-Genome-Picea-abies-GCA_900067695.1-2016-11-09.one_line	11960690255	5000	3	ATG_222	362770000	23.5567	21.0364	23.4837	26.8649	17.9416	20.554	20.5741
DNA-Genome-Picea-abies-GCA_900067695.1-2016-11-09.one_line	11960690255	5000	3	ATG_123	38220000	22.8015	21.7187	22.9153	26.3479	20.2497	21.0018	20.9723
DNA-Genome-Picea-abies-GCA_900067695.1-2016-11-09.one_line	11960690255	5000	3	TAG_123	23395000	23.2651	23.2814	23.4519	26.5199	22.0061	22.3901	22.4019
DNA-Genome-Picea-abies-GCA_900067695.1-2016-11-09.one_line	11960690255	5000	3	TCA_123	1690000	21.1847	19.6328	21.3875	24.2289	18.6392	18.6231	18.6346
DNA-Genome-Picea-abies-GCA_900067695.1-2016-11-09.one_line	11960690255	5000	3	AGC_123	1350000	21.3479	19.1057	21.5256	24.2396	18.882	18.8175	18.8228
DNA-Genome-Picea-abies-GCA_900067695.1-2016-11-09.one_line	11960690255	5000	3	ACG_222	410000	20.7695	18.7824	20.9176	22.759	17.9427	17.9973	17.9093
DNA-Genome-Picea-abies-GCA_900067695.1-2016-11-09.one_line	11960690255	5000	3	CTG_222	405000	21.2642	19.14	21.4222	23.2296	18.3277	18.2948	18.2667
DNA-Genome-Picea-abies-GCA_900067695.1-2016-11-09.one_line	11960690255	5000	3	AGT_123	170000	22.2388	23.2359	22.5165	24.9853	22.9418	22.9818	22.9976
DNA-Genome-Picea-abies-GCA_900067695.1-2016-11-09.one_line	11960690255	5000	3	CTA_123	100000	14.791	15.317	15.178	17.425	15.808	15.465	15.636
DNA-Genome-Picea-abies-GCA_900067695.1-2016-11-09.one_line	11960690255	5000	3	ACT_123	45000	20.0178	18.6311	20.3111	22.48	20.44	20.0622	20.1778
DNA-Genome-Picea-abies-GCA_900067695.1-2016-11-09.one_line	11960690255	5000	3	GAC_123	45000	18.0044	17.9533	18.3956	20.68	20.0956	19.6222	19.7956
DNA-Genome-Picea-abies-GCA_900067695.1-2016-11-09.one_line	11960690255	5000	3	TGA_123	40000	20.895	21.1125	21.38	23.5	21.965	21.5375	21.78
DNA-Genome-Picea-abies-GCA_900067695.1-2016-11-09.one_line	11960690255	5000	3	GAT_123	10000	20.36	19.69	21.3	23.45	23.13	21.59	22.4
DNA-Genome-Picea-abies-GCA_900067695.1-2016-11-09.one_line	11960690255	5000	3	TCG_123	5000	19.24	19.82	20.44	22.12	25.04	22.58	23.52
DNA-Genome-Picea-abies-GCA_900067695.1-2016-11-09.one_line	11960690255	10000	3	ACT_222	10363930255	23.6873	20.7191	23.6733	26.8715	17.9707	20.8828	20.9154
DNA-Genome-Picea-abies-GCA_900067695.1-2016-11-09.one_line	11960690255	10000	3	ATG_222	645400000	23.6426	21.3431	23.6337	26.8461	18.1559	20.8287	20.8592
DNA-Genome-Picea-abies-GCA_900067695.1-2016-11-09.one_line	11960690255	10000	3	TAC_123	454720000	23.3362	22.8055	23.5756	26.5667	20.3057	22.2454	22.2724
DNA-Genome-Picea-abies-GCA_900067695.1-2016-11-09.one_line	11960690255	10000	3	ATC_123	431890000	23.3601	22.8104	23.6067	26.5592	20.4161	22.332	22.3597
DNA-Genome-Picea-abies-GCA_900067695.1-2016-11-09.one_line	11960690255	10000	3	ATG_123	40790000	23.1276	22.3328	23.2886	26.4673	20.7975	21.566	21.5741
DNA-Genome-Picea-abies-GCA_900067695.1-2016-11-09.one_line	11960690255	10000	3	TAG_123	23320000	23.3461	23.4664	23.5668	26.5179	22.1857	22.5509	22.5582
DNA-Genome-Picea-abies-GCA_900067695.1-2016-11-09.one_line	11960690255	10000	3	TCA_123	220000	19.6259	18.4941	19.87	21.9441	18.505	18.4123	18.46
DNA-Genome-Picea-abies-GCA_900067695.1-2016-11-09.one_line	11960690255	10000	3	ACG_222	160000	19.2481	18.3294	19.4238	21.1381	18.4681	18.5475	18.35
DNA-Genome-Picea-abies-GCA_900067695.1-2016-11-09.one_line	11960690255	10000	3	AGC_123	140000	18.7736	17.3579	19.0557	21.2364	18.235	17.8807	18.1571
DNA-Genome-Picea-abies-GCA_900067695.1-2016-11-09.one_line	11960690255	10000	3	CTG_222	80000	22.7238	23.0175	23.0425	24.995	23.44	23.4225	23.35
DNA-Genome-Picea-abies-GCA_900067695.1-2016-11-09.one_line	11960690255	10000	3	AGT_123	40000	19.6725	19.26	20.125	22.04	19.3175	18.8825	19.12
DNA-Genome-Picea-abies-GCA_900067695.1-2016-11-09.one_line	11960690255	25	4	ACTG_2222	4142321755	24.0685	22.7756	24.0551	26.9354	21.9719	23.7219	23.7602
DNA-Genome-Picea-abies-GCA_900067695.1-2016-11-09.one_line	11960690255	25	4	TACG_1233	2058488775	22.3849	22.0774	22.7704	26.0144	22.184	23.2355	23.2608
DNA-Genome-Picea-abies-GCA_900067695.1-2016-11-09.one_line	11960690255	25	4	ATCG_1233	1686037400	22.3217	22.0833	22.7195	25.973	22.2873	23.2728	23.293
DNA-Genome-Picea-abies-GCA_900067695.1-2016-11-09.one_line	11960690255	25	4	TCAG_1233	753355650	22.0111	21.6943	22.2712	25.9083	21.5218	22.7131	22.7593
DNA-Genome-Picea-abies-GCA_900067695.1-2016-11-09.one_line	11960690255	25	4	ACTG_1233	731709050	22.0979	21.9064	22.3773	25.9331	21.8787	22.9582	23.0013
DNA-Genome-Picea-abies-GCA_900067695.1-2016-11-09.one_line	11960690255	25	4	AGCT_1233	613317700	21.9687	21.7458	22.2724	25.8073	21.6667	22.7771	22.8212
DNA-Genome-Picea-abies-GCA_900067695.1-2016-11-09.one_line	11960690255	25	4	TGAC_1233	514148100	21.97	21.8377	22.2343	25.7747	21.852	22.8808	22.9271
DNA-Genome-Picea-abies-GCA_900067695.1-2016-11-09.one_line	11960690255	25	4	GACT_1233	270103225	21.8265	21.7835	22.0156	25.7956	21.3991	22.5117	22.5746
DNA-Genome-Picea-abies-GCA_900067695.1-2016-11-09.one_line	11960690255	25	4	CATG_1233	238071925	21.7511	21.7029	21.884	25.7923	21.3355	22.4183	22.4838
DNA-Genome-Picea-abies-GCA_900067695.1-2016-11-09.one_line	11960690255	25	4	CTAG_1233	221613425	21.626	21.5528	21.7714	25.6912	21.2305	22.3291	22.3995
DNA-Genome-Picea-abies-GCA_900067695.1-2016-11-09.one_line	11960690255	25	4	GTAC_1233	188729975	21.7649	21.7892	21.9241	25.7801	21.4875	22.4876	22.5497
DNA-Genome-Picea-abies-GCA_900067695.1-2016-11-09.one_line	11960690255	25	4	ACT_122	106206725	18.1819	18.3802	18.3734	21.8796	18.7782	19.2378	19.2307
DNA-Genome-Picea-abies-GCA_900067695.1-2016-11-09.one_line	11960690255	25	4	ATG_122	103944250	18.2725	18.4623	18.4548	21.9414	18.9088	19.3236	19.3307
DNA-Genome-Picea-abies-GCA_900067695.1-2016-11-09.one_line	11960690255	25	4	TAC_122	92134600	18.1267	18.3115	18.324	21.8163	18.7895	19.1897	19.1929
DNA-Genome-Picea-abies-GCA_900067695.1-2016-11-09.one_line	11960690255	25	4	TAG_122	91404925	18.1134	18.299	18.3256	21.8074	18.7671	19.1816	19.1805
DNA-Genome-Picea-abies-GCA_900067695.1-2016-11-09.one_line	11960690255	25	4	CAT_122	35170300	17.878	18.1608	17.9508	21.7573	18.5314	18.7642	18.7757
DNA-Genome-Picea-abies-GCA_900067695.1-2016-11-09.one_line	11960690255	25	4	GAT_122	26256000	17.9266	18.1831	17.8945	21.7282	18.6751	18.8249	18.8468
DNA-Genome-Picea-abies-GCA_900067695.1-2016-11-09.one_line	11960690255	25	4	GCAT_1233	26038800	20.5454	20.5375	20.3301	24.8455	20.8666	21.0874	21.1727
DNA-Genome-Picea-abies-GCA_900067695.1-2016-11-09.one_line	11960690255	25	4	CGAT_1233	21750500	20.4113	20.4205	20.2437	24.6962	20.7974	20.9393	21.0241
DNA-Genome-Picea-abies-GCA_900067695.1-2016-11-09.one_line	11960690255	25	4	AT_11	12350250	9.5587	10.422	9.6548	12.5393	10.9814	11.5833	10.9855
DNA-Genome-Picea-abies-GCA_900067695.1-2016-11-09.one_line	11960690255	25	4	ACG_122	6726225	16.5182	17.1444	16.7981	20.4138	17.695	17.6619	17.6952
DNA-Genome-Picea-abies-GCA_900067695.1-2016-11-09.one_line	11960690255	25	4	TCG_122	6614850	16.4969	17.122	16.7889	20.449	17.6629	17.6177	17.6614
DNA-Genome-Picea-abies-GCA_900067695.1-2016-11-09.one_line	11960690255	25	4	CTG_122	1451050	16.4801	17.4979	16.765	19.817	17.7731	17.7269	17.775
DNA-Genome-Picea-abies-GCA_900067695.1-2016-11-09.one_line	11960690255	25	4	CT_11	1254975	8.2009	9.6649	8.3273	10.6156	9.8116	10.4436	9.8316
DNA-Genome-Picea-abies-GCA_900067695.1-2016-11-09.one_line	11960690255	25	4	AG_11	1048650	8.2539	9.6975	8.387	10.6405	9.8986	10.5016	9.9362
DNA-Genome-Picea-abies-GCA_900067695.1-2016-11-09.one_line	11960690255	25	4	ATGC_2223	1012825	25.3861	27.3567	26.0566	28.7289	27.5193	27.5932	27.5278
DNA-Genome-Picea-abies-GCA_900067695.1-2016-11-09.one_line	11960690255	25	4	GAC_122	923675	16.6648	17.5605	16.9705	19.7096	17.9968	17.9842	17.9812
DNA-Genome-Picea-abies-GCA_900067695.1-2016-11-09.one_line	11960690255	25	4	ATNC_2223	850025	21.4737	25.4268	22.1408	25.0954	24.4132	24.4399	24.4087
DNA-Genome-Picea-abies-GCA_900067695.1-2016-11-09.one_line	11960690255	25	4	ACTG_2223	826950	25.229	27.1785	25.9397	28.6171	27.4099	27.439	27.4101
DNA-Genome-Picea-abies-GCA_900067695.1-2016-11-09.one_line	11960690255	25	4	CAG_122	535925	16.2724	16.8496	16.5045	18.9088	17.5515	17.5101	17.5196
DNA-Genome-Picea-abies-GCA_900067695.1-2016-11-09.one_line	11960690255	25	4	GCT_122	473975	16.2994	16.8794	16.5481	18.9508	17.6073	17.5613	17.5992
DNA-Genome-Picea-abies-GCA_900067695.1-2016-11-09.one_line	11960690255	25	4	CTNA_2223	376025	21.3297	25.2547	22.0858	24.9191	24.6204	24.6034	24.6016
DNA-Genome-Picea-abies-GCA_900067695.1-2016-11-09.one_line	11960690255	25	4	AC_11	364875	4.5215	5.8124	4.6536	5.9977	6.4099	6.8933	6.3847
DNA-Genome-Picea-abies-GCA_900067695.1-2016-11-09.one_line	11960690255	25	4	AGNC_2223	361825	21.3548	25.3233	22.0996	24.8678	24.6102	24.592	24.582
DNA-Genome-Picea-abies-GCA_900067695.1-2016-11-09.one_line	11960690255	25	4	TG_11	356475	4.5829	5.8517	4.7195	6.0843	6.507	6.934	6.4756
DNA-Genome-Picea-abies-GCA_900067695.1-2016-11-09.one_line	11960690255	25	4	CTGA_2223	342900	25.6769	27.6028	26.4637	28.8475	28.1487	28.2021	28.1085
DNA-Genome-Picea-abies-GCA_900067695.1-2016-11-09.one_line	11960690255	25	4	TGNA_2223	337850	21.2793	25.2079	22.0465	24.7811	24.5961	24.6086	24.573
DNA-Genome-Picea-abies-GCA_900067695.1-2016-11-09.one_line	11960690255	25	4	ACGT_2223	289600	25.7189	27.5805	26.5021	28.8947	28.1948	28.3032	28.1809
DNA-Genome-Picea-abies-GCA_900067695.1-2016-11-09.one_line	11960690255	25	4	ACNT_2223	279575	21.5005	25.5473	22.3067	25.1725	24.7873	24.7737	24.7533
DNA-Genome-Picea-abies-GCA_900067695.1-2016-11-09.one_line	11960690255	25	4	ACTG_1333	183000	23.224	25.9978	24.0929	27.1814	26.1344	26.1869	26.1071
DNA-Genome-Picea-abies-GCA_900067695.1-2016-11-09.one_line	11960690255	25	4	TACG_1333	181550	23.1226	25.9521	23.9857	27.1688	26.0463	26.0193	25.9719
DNA-Genome-Picea-abies-GCA_900067695.1-2016-11-09.one_line	11960690255	25	4	ATGC_1234	174350	24.1285	25.0995	25.0852	27.9696	27.1247	27.1047	27.0926
DNA-Genome-Picea-abies-GCA_900067695.1-2016-11-09.one_line	11960690255	25	4	TAGC_1234	158200	24.0569	24.9905	25.0544	28.0765	27.1909	27.1327	27.1226
DNA-Genome-Picea-abies-GCA_900067695.1-2016-11-09.one_line	11960690255	25	4	TACG_1234	122100	24.0966	25.0287	25.1319	28.041	27.2531	27.2441	27.1974
DNA-Genome-Picea-abies-GCA_900067695.1-2016-11-09.one_line	11960690255	25	4	ATCG_1234	119825	24.0876	25.0849	25.1266	28.1344	27.3173	27.2689	27.2431
DNA-Genome-Picea-abies-GCA_900067695.1-2016-11-09.one_line	11960690255	25	4	ATGN_2222	96100	19.0968	23.4277	19.7253	22.7263	22.2872	22.307	22.2227
DNA-Genome-Picea-abies-GCA_900067695.1-2016-11-09.one_line	11960690255	25	4	ACTN_2222	94250	19.0822	23.3337	19.6944	22.661	22.3862	22.366	22.2599
DNA-Genome-Picea-abies-GCA_900067695.1-2016-11-09.one_line	11960690255	25	4	AGTC_1234	82175	24.1789	25.1366	25.2875	28.0961	27.7676	27.6447	27.7213
DNA-Genome-Picea-abies-GCA_900067695.1-2016-11-09.one_line	11960690255	25	4	ACTG_1234	80350	24.0075	24.9956	25.0629	27.8531	27.374	27.3479	27.3006
DNA-Genome-Picea-abies-GCA_900067695.1-2016-11-09.one_line	11960690255	25	4	CGNA_2223	79425	21.628	25.7891	22.4992	24.9632	25.8735	25.8319	25.8004
DNA-Genome-Picea-abies-GCA_900067695.1-2016-11-09.one_line	11960690255	25	4	ATNC_1234	78675	21.5545	24.8719	22.6298	26.0947	24.938	24.8249	24.816
DNA-Genome-Picea-abies-GCA_900067695.1-2016-11-09.one_line	11960690255	25	4	TANC_1234	71250	21.4779	24.9782	22.5937	26.0674	24.9067	24.8351	24.7804
DNA-Genome-Picea-abies-GCA_900067695.1-2016-11-09.one_line	11960690255	25	4	TCAG_1234	64500	24.0667	25.0434	25.1938	28.138	27.8233	27.6481	27.7519
DNA-Genome-Picea-abies-GCA_900067695.1-2016-11-09.one_line	11960690255	25	4	TGAC_1234	60200	23.9917	25.0482	25.113	27.8754	27.8289	27.6362	27.6346
DNA-Genome-Picea-abies-GCA_900067695.1-2016-11-09.one_line	11960690255	25	4	NACT_1333	51100	17.865	21.5871	18.544	19.7084	22.8219	22.4755	22.6771
DNA-Genome-Picea-abies-GCA_900067695.1-2016-11-09.one_line	11960690255	25	4	TCGA_1234	46725	24.2932	25.1514	25.5281	28.4002	28.2996	28.1562	28.1648
DNA-Genome-Picea-abies-GCA_900067695.1-2016-11-09.one_line	11960690255	25	4	ANTC_1234	44225	18.4986	22.8016	19.5862	22.4104	22.9079	22.7586	22.7564
DNA-Genome-Picea-abies-GCA_900067695.1-2016-11-09.one_line	11960690255	25	4	ACGT_1234	38950	24.3877	25.2965	25.5815	28.3594	28.5597	28.38	28.3646
DNA-Genome-Picea-abies-GCA_900067695.1-2016-11-09.one_line	11960690255	25	4	NATC_1234	38650	16.8823	20.088	17.8163	19.7076	21.8991	21.6093	21.7128
DNA-Genome-Picea-abies-GCA_900067695.1-2016-11-09.one_line	11960690255	25	4	TAGN_1233	38075	20.0315	22.3375	20.8903	24.2049	23.8713	23.6559	23.6796
DNA-Genome-Picea-abies-GCA_900067695.1-2016-11-09.one_line	11960690255	25	4	TNAC_1234	36800	18.5598	22.8967	19.6739	22.4701	23.1576	22.8995	22.9783
DNA-Genome-Picea-abies-GCA_900067695.1-2016-11-09.one_line	11960690255	25	4	TACN_1233	36525	20.167	22.3518	21.076	24.4627	24.0082	23.7235	23.7755
DNA-Genome-Picea-abies-GCA_900067695.1-2016-11-09.one_line	11960690255	25	4	ATN_122	36175	7.3531	9.3766	7.718	9.8521	11.9724	10.1949	9.4762
DNA-Genome-Picea-abies-GCA_900067695.1-2016-11-09.one_line	11960690255	25	4	GATC_1234	34975	24.3374	25.2695	25.5668	28.2916	28.6719	28.426	28.4203
DNA-Genome-Picea-abies-GCA_900067695.1-2016-11-09.one_line	11960690255	25	4	TGCA_1234	33700	24.4718	25.3175	25.7982	28.5134	28.7567	28.5668	28.5697
DNA-Genome-Picea-abies-GCA_900067695.1-2016-11-09.one_line	11960690255	25	4	ANGC_1234	33650	18.5498	22.6657	19.679	22.4101	23.2303	23.0163	23.049
DNA-Genome-Picea-abies-GCA_900067695.1-2016-11-09.one_line	11960690255	25	4	CTAG_1234	33450	24.3797	25.2646	25.6861	28.4036	28.6457	28.3827	28.4245
DNA-Genome-Picea-abies-GCA_900067695.1-2016-11-09.one_line	11960690255	25	4	ATCN_1233	31200	19.9968	22.3782	20.9167	24.2949	23.9936	23.6955	23.7692
DNA-Genome-Picea-abies-GCA_900067695.1-2016-11-09.one_line	11960690255	25	4	TNCA_1234	30700	18.5114	23.0326	19.6873	22.5537	23.2964	23.0945	23.0489
DNA-Genome-Picea-abies-GCA_900067695.1-2016-11-09.one_line	11960690255	25	4	ATGN_1233	30050	20.1897	22.3627	21.0316	24.5092	24.1697	23.8735	23.8935
DNA-Genome-Picea-abies-GCA_900067695.1-2016-11-09.one_line	11960690255	25	4	NTAC_1234	29000	16.9931	20.3414	18.0069	19.9241	22.3207	21.8759	22.0552
DNA-Genome-Picea-abies-GCA_900067695.1-2016-11-09.one_line	11960690255	25	4	TNGA_1234	28875	18.6736	22.4	19.8511	22.6632	23.5325	23.2277	23.2727
DNA-Genome-Picea-abies-GCA_900067695.1-2016-11-09.one_line	11960690255	25	4	AGNC_1234	26625	21.615	25.0629	23.031	26.231	26.1258	25.7427	25.8103
DNA-Genome-Picea-abies-GCA_900067695.1-2016-11-09.one_line	11960690255	25	4	CATG_1234	26475	24.5401	25.5109	25.8659	28.5212	29.1256	28.7781	28.8574
DNA-Genome-Picea-abies-GCA_900067695.1-2016-11-09.one_line	11960690255	25	4	AGCT_1234	26375	24.4209	25.2929	25.8199	28.6028	29.1033	28.7128	28.8455
DNA-Genome-Picea-abies-GCA_900067695.1-2016-11-09.one_line	11960690255	25	4	TCNA_1234	26350	21.5863	25.1651	22.945	26.1822	26.0152	25.5446	25.7457
DNA-Genome-Picea-abies-GCA_900067695.1-2016-11-09.one_line	11960690255	25	4	NAGC_1234	25700	17.1167	20.537	18.2101	19.9416	22.5798	22.2257	22.3191
DNA-Genome-Picea-abies-GCA_900067695.1-2016-11-09.one_line	11960690255	25	4	NTCA_1234	22875	17.1497	20.4328	18.282	19.9694	22.6317	22.2689	22.3301
DNA-Genome-Picea-abies-GCA_900067695.1-2016-11-09.one_line	11960690255	25	4	TCAN_1233	22625	20.2431	22.6564	21.1624	24.4597	24.5171	24.2166	24.221
DNA-Genome-Picea-abies-GCA_900067695.1-2016-11-09.one_line	11960690255	25	4	NTGA_1234	22275	17.1852	20.5657	18.3075	20.009	22.963	22.4242	22.6442
DNA-Genome-Picea-abies-GCA_900067695.1-2016-11-09.one_line	11960690255	25	4	GTAC_1234	22000	24.5909	25.3773	26.0545	28.6409	29.4273	29.0136	29.1091
DNA-Genome-Picea-abies-GCA_900067695.1-2016-11-09.one_line	11960690255	25	4	ACNT_1234	20675	21.6832	25.0979	23.081	25.9927	26.162	25.7993	25.8283
DNA-Genome-Picea-abies-GCA_900067695.1-2016-11-09.one_line	11960690255	25	4	TGNA_1234	20075	21.7484	25.4097	23.213	25.9577	26.4857	26.0025	26.1021
DNA-Genome-Picea-abies-GCA_900067695.1-2016-11-09.one_line	11960690255	25	4	TAN_122	19375	8.449	10.9832	8.96	11.1071	13.5381	11.6439	11.4787
DNA-Genome-Picea-abies-GCA_900067695.1-2016-11-09.one_line	11960690255	25	4	ANCT_1234	18975	18.7352	22.4242	19.9947	22.7404	24.0685	23.5679	23.6733
DNA-Genome-Picea-abies-GCA_900067695.1-2016-11-09.one_line	11960690255	25	4	CATG_1333	18500	23.3568	26.0649	24.6595	27.2811	28.5676	28.0919	28.1946
DNA-Genome-Picea-abies-GCA_900067695.1-2016-11-09.one_line	11960690255	25	4	ACTN_1233	18375	20.6204	22.8245	21.5728	24.7673	25.1537	24.5932	24.7946
DNA-Genome-Picea-abies-GCA_900067695.1-2016-11-09.one_line	11960690255	25	4	GACT_1333	18350	23.1553	25.7384	24.4469	27.1172	28.2016	27.6458	27.8365
DNA-Genome-Picea-abies-GCA_900067695.1-2016-11-09.one_line	11960690255	25	4	AGTN_1233	17725	20.4852	22.6855	21.4838	24.8463	25.0945	24.598	24.6883
DNA-Genome-Picea-abies-GCA_900067695.1-2016-11-09.one_line	11960690255	25	4	CTGA_1234	17125	24.8117	25.5825	26.3124	28.7066	30.1197	29.5358	29.7343
DNA-Genome-Picea-abies-GCA_900067695.1-2016-11-09.one_line	11960690255	25	4	NACT_1234	15750	17.1429	20.4254	18.3111	19.9238	23.3016	22.5968	22.8317
DNA-Genome-Picea-abies-GCA_900067695.1-2016-11-09.one_line	11960690255	25	4	TGAN_1233	14350	20.6829	22.7875	21.6585	24.878	25.5261	24.9268	25.0314
DNA-Genome-Picea-abies-GCA_900067695.1-2016-11-09.one_line	11960690255	25	4	ANTG_1233	14350	16.446	20.5296	17.2962	20.0139	21.9164	21.2683	21.4077
DNA-Genome-Picea-abies-GCA_900067695.1-2016-11-09.one_line	11960690255	25	4	TNAG_1233	14300	16.1259	20.0839	16.9231	19.8322	21.4056	20.8112	20.9231
DNA-Genome-Picea-abies-GCA_900067695.1-2016-11-09.one_line	11960690255	25	4	TNAC_1233	13675	16.5484	20.4607	17.4186	20.3071	21.989	21.2797	21.4698
DNA-Genome-Picea-abies-GCA_900067695.1-2016-11-09.one_line	11960690255	25	4	ANCT_1233	13475	16.3785	20.0594	17.1874	20.0445	21.6772	21.039	21.1651
DNA-Genome-Picea-abies-GCA_900067695.1-2016-11-09.one_line	11960690255	25	4	GATN_1233	13175	20.9108	22.9753	21.9203	25.3662	26.1784	25.4801	25.6546
DNA-Genome-Picea-abies-GCA_900067695.1-2016-11-09.one_line	11960690255	25	4	NATG_1233	12500	15.464	19.128	16.208	18.272	21.576	20.84	21.088
DNA-Genome-Picea-abies-GCA_900067695.1-2016-11-09.one_line	11960690255	25	4	NACT_1233	11975	15.3904	18.9729	16.1503	18.1545	21.3361	20.6848	20.7432
DNA-Genome-Picea-abies-GCA_900067695.1-2016-11-09.one_line	11960690255	25	4	NTAG_1233	11775	15.3461	19.1083	16.051	18.1571	21.4183	20.7219	20.8238
DNA-Genome-Picea-abies-GCA_900067695.1-2016-11-09.one_line	11960690255	25	4	NTAC_1233	11500	15.3739	19.0087	16.1043	18.2435	21.4696	20.6348	20.8696
DNA-Genome-Picea-abies-GCA_900067695.1-2016-11-09.one_line	11960690255	25	4	CTAN_1233	11225	20.9265	22.5835	21.9866	25.5145	26.3786	25.7728	25.7639
DNA-Genome-Picea-abies-GCA_900067695.1-2016-11-09.one_line	11960690255	25	4	CAGT_1234	10800	24.9537	25.3056	26.5926	28.9815	30.7778	30.0556	30.1111
DNA-Genome-Picea-abies-GCA_900067695.1-2016-11-09.one_line	11960690255	25	4	CTNA_1234	10100	22.396	25.495	24.1188	27.1386	28.4158	27.5644	27.7228
DNA-Genome-Picea-abies-GCA_900067695.1-2016-11-09.one_line	11960690255	25	4	CATN_1233	9925	21.3602	23.1436	22.4484	25.6322	26.9219	26.0756	26.1965
DNA-Genome-Picea-abies-GCA_900067695.1-2016-11-09.one_line	11960690255	25	4	GTCA_1234	9525	25.1864	25.5958	26.8976	29.1549	31.5696	30.7192	30.8241
DNA-Genome-Picea-abies-GCA_900067695.1-2016-11-09.one_line	11960690255	25	4	GANC_1234	8950	22.2346	25.3631	23.9777	26.9721	28.4693	27.5642	27.7095
DNA-Genome-Picea-abies-GCA_900067695.1-2016-11-09.one_line	11960690255	25	4	GACT_1234	8900	25.1573	25.5843	26.9888	29.191	31.5843	30.7079	30.7865
DNA-Genome-Picea-abies-GCA_900067695.1-2016-11-09.one_line	11960690255	25	4	NGTA_1234	8600	18	21.3488	19.4419	20.8721	25.2907	24.3721	24.4651
DNA-Genome-Picea-abies-GCA_900067695.1-2016-11-09.one_line	11960690255	25	4	GTAN_1233	8450	21.5503	23.3018	22.6746	25.7515	27.5266	26.497	26.6982
DNA-Genome-Picea-abies-GCA_900067695.1-2016-11-09.one_line	11960690255	25	4	NCTA_1234	8225	17.8602	21.0699	19.2584	20.3769	25.2523	24.2553	24.4134
DNA-Genome-Picea-abies-GCA_900067695.1-2016-11-09.one_line	11960690255	25	4	CTN_122	6700	9.3731	11.3881	10.2985	12.6567	15.4776	12.5224	12.8955
DNA-Genome-Picea-abies-GCA_900067695.1-2016-11-09.one_line	11960690255	25	4	NCAT_1234	6025	18.1577	21.2946	19.7842	20.9295	26.556	25.0456	25.361
DNA-Genome-Picea-abies-GCA_900067695.1-2016-11-09.one_line	11960690255	25	4	GTNA_1234	5975	22.9121	25.9079	24.9372	27.7657	30.3933	28.8368	29.1883
DNA-Genome-Picea-abies-GCA_900067695.1-2016-11-09.one_line	11960690255	25	4	NGAC_1234	5900	18.0678	21.2881	19.6949	20.7458	26.5932	24.9661	25.4237
DNA-Genome-Picea-abies-GCA_900067695.1-2016-11-09.one_line	11960690255	25	4	AGN_122	5600	9.3036	11.75	10.3929	12.7679	16.875	12.9464	13.3571
DNA-Genome-Picea-abies-GCA_900067695.1-2016-11-09.one_line	11960690255	25	4	CNTA_1234	5575	19.3004	22.296	20.843	23.2108	26.8341	25.0404	25.6143
DNA-Genome-Picea-abies-GCA_900067695.1-2016-11-09.one_line	11960690255	25	4	CNAT_1233	5550	16.2523	19.6396	17.2252	20.0901	23.6036	21.7838	22.3423
DNA-Genome-Picea-abies-GCA_900067695.1-2016-11-09.one_line	11960690255	25	4	CANT_1234	5475	23.3425	26.0274	25.3516	27.9269	31.3607	29.589	30.1005
DNA-Genome-Picea-abies-GCA_900067695.1-2016-11-09.one_line	11960690255	25	4	GNAT_1233	5425	16.4977	20.2212	17.5484	20.1843	24.2765	22.4147	23.0046
DNA-Genome-Picea-abies-GCA_900067695.1-2016-11-09.one_line	11960690255	25	4	NCAT_1233	5325	16.3192	19.8873	17.1643	19.23	24.4131	22.5915	23.061
DNA-Genome-Picea-abies-GCA_900067695.1-2016-11-09.one_line	11960690255	25	4	NAT_122	5000	7.46	9.32	8.32	9.3	15.72	10.76	11.04
DNA-Genome-Picea-abies-GCA_900067695.1-2016-11-09.one_line	11960690255	25	4	NGAT_1233	4950	16.5455	20.1212	17.3737	19.4747	24.9697	22.8889	23.5152
DNA-Genome-Picea-abies-GCA_900067695.1-2016-11-09.one_line	11960690255	25	4	GNTA_1234	4500	19.5778	22.6889	21.3778	23.3778	28.2889	26.0444	26.7556
DNA-Genome-Picea-abies-GCA_900067695.1-2016-11-09.one_line	11960690255	25	4	ACN_122	4425	10.0565	12.6328	11.3898	13.4689	18.8475	13.7175	14.2825
DNA-Genome-Picea-abies-GCA_900067695.1-2016-11-09.one_line	11960690255	25	4	ANCG_1233	4350	16.8736	21.1034	18.2069	21.4253	25.0575	22.6667	23.4483
DNA-Genome-Picea-abies-GCA_900067695.1-2016-11-09.one_line	11960690255	25	4	ACGN_2222	4225	19.9053	24.426	21.3018	24.1893	28.5207	26.0828	26.8876
DNA-Genome-Picea-abies-GCA_900067695.1-2016-11-09.one_line	11960690255	25	4	TCN_122	4150	12.0482	14.988	13.3012	16.241	19.6627	16.1928	17.0602
DNA-Genome-Picea-abies-GCA_900067695.1-2016-11-09.one_line	11960690255	25	4	TCGN_1233	4075	20.9325	22.4294	22.2822	26.0613	29.2025	26.6503	27.4847
DNA-Genome-Picea-abies-GCA_900067695.1-2016-11-09.one_line	11960690255	25	4	CTGN_2222	4000	20.25	25.075	21.4	24.05	29.05	26.475	27.3
DNA-Genome-Picea-abies-GCA_900067695.1-2016-11-09.one_line	11960690255	25	4	GAN_122	3900	10.9744	13.7692	12.359	14.6923	17.8718	14.6667	15.6923
DNA-Genome-Picea-abies-GCA_900067695.1-2016-11-09.one_line	11960690255	25	4	TGN_122	3750	10.8	13.1733	12.0533	14.48	19.0133	14.72	15.5733
DNA-Genome-Picea-abies-GCA_900067695.1-2016-11-09.one_line	11960690255	25	4	TNCG_1233	3725	17.396	21.2617	18.5235	21.9597	26.0134	23.2752	24.1611
DNA-Genome-Picea-abies-GCA_900067695.1-2016-11-09.one_line	11960690255	25	4	GNAC_1234	3700	19.8378	22.9189	21.6216	23.6757	29.2432	26.3243	27.3514
DNA-Genome-Picea-abies-GCA_900067695.1-2016-11-09.one_line	11960690255	25	4	GCTA_1234	3625	26.6759	26.3448	28.8552	30.6207	36.8276	33.9862	34.869
DNA-Genome-Picea-abies-GCA_900067695.1-2016-11-09.one_line	11960690255	25	4	AGCN_1233	2825	20.9912	22.5487	22.7965	25.8761	31.115	27.4336	28.6018
DNA-Genome-Picea-abies-GCA_900067695.1-2016-11-09.one_line	11960690255	25	4	CNAT_1234	2725	20.7339	23.2661	22.7523	24.5505	31.8165	28	29.211
DNA-Genome-Picea-abies-GCA_900067695.1-2016-11-09.one_line	11960690255	25	4	TN_11	2475	6.2626	7.2727	7.7576	8.5253	17.4141	9.8586	10.6667
DNA-Genome-Picea-abies-GCA_900067695.1-2016-11-09.one_line	11960690255	25	4	CAN_122	2475	11.7576	14.2222	13.5758	15.596	20.3232	15.798	17.2929
DNA-Genome-Picea-abies-GCA_900067695.1-2016-11-09.one_line	11960690255	25	4	ACGN_1233	2450	22.1633	23.3061	23.9184	27.5102	33.1429	28.898	30.2041
DNA-Genome-Picea-abies-GCA_900067695.1-2016-11-09.one_line	11960690255	25	4	NCGA_1234	2375	20.5474	23.2421	22.4842	23.2842	33.4316	29.0526	30.4842
DNA-Genome-Picea-abies-GCA_900067695.1-2016-11-09.one_line	11960690255	25	4	NTCG_1233	2350	17.8298	21.0213	18.8085	20.8936	29.2766	24.8936	26.2128
DNA-Genome-Picea-abies-GCA_900067695.1-2016-11-09.one_line	11960690255	25	4	CGTA_1234	2350	28.0851	26.383	30.6383	32.2128	41.0638	36.6809	38.1277
DNA-Genome-Picea-abies-GCA_900067695.1-2016-11-09.one_line	11960690255	25	4	TGCN_1233	2200	22.2727	22.6818	23.6364	26.9091	33.4091	28.7273	30.1818
DNA-Genome-Picea-abies-GCA_900067695.1-2016-11-09.one_line	11960690255	25	4	NGCA_1234	2125	20.9412	23.4353	23.1529	24.2824	34.4	29.5059	31.0588
DNA-Genome-Picea-abies-GCA_900067695.1-2016-11-09.one_line	11960690255	25	4	NACG_1233	2100	17.1905	21.2381	18.381	20.0476	29.5714	24.619	26.2857
DNA-Genome-Picea-abies-GCA_900067695.1-2016-11-09.one_line	11960690255	25	4	GTN_122	2075	12.7229	15.3253	14.3614	16.4337	23.0843	17.0602	18.6988
DNA-Genome-Picea-abies-GCA_900067695.1-2016-11-09.one_line	11960690255	25	4	C_1	2025	1.5802	0.5926	3.358	2.2222	7.4074	2.4691	4.1481
DNA-Genome-Picea-abies-GCA_900067695.1-2016-11-09.one_line	11960690255	25	4	G_1	2000	1.6	0.6	3.4	2.25	7.5	2.5	4.2
DNA-Genome-Picea-abies-GCA_900067695.1-2016-11-09.one_line	11960690255	25	4	CGAT_1234	1975	28.557	26.5316	31.2911	32.3038	42.6835	37.4177	39.0886
DNA-Genome-Picea-abies-GCA_900067695.1-2016-11-09.one_line	11960690255	25	4	GCAT_1234	1875	28.16	27.2	30.9333	32.2133	41.8667	36.32	38.1867
DNA-Genome-Picea-abies-GCA_900067695.1-2016-11-09.one_line	11960690255	25	4	CG_11	1725	8.9855	10.1449	11.2464	13.1014	19.942	13.2754	14.8406
DNA-Genome-Picea-abies-GCA_900067695.1-2016-11-09.one_line	11960690255	25	4	GNCA_1234	1675	21.194	23.4627	23.1642	24.3582	34.6866	28.4179	30.5672
DNA-Genome-Picea-abies-GCA_900067695.1-2016-11-09.one_line	11960690255	25	4	A_1	1650	1.9394	0.7273	4.1212	2.6667	9.1515	2.9091	4.8485
DNA-Genome-Picea-abies-GCA_900067695.1-2016-11-09.one_line	11960690255	25	4	CNGA_1234	1550	22.9677	24.8387	25.1613	26.3226	37.4194	30.7097	32.7742
DNA-Genome-Picea-abies-GCA_900067695.1-2016-11-09.one_line	11960690255	25	4	GACN_1233	1500	22.2	23.4	24.6667	27.8667	36.8667	29.9333	32.2667
DNA-Genome-Picea-abies-GCA_900067695.1-2016-11-09.one_line	11960690255	25	4	AN_11	1475	7.4576	9.1525	9.7627	9.8983	25.6271	11.5254	13.2881
DNA-Genome-Picea-abies-GCA_900067695.1-2016-11-09.one_line	11960690255	25	4	GN_11	1150	8.3478	8.9565	10.9565	10.9565	25.3043	12.6087	14.6087
DNA-Genome-Picea-abies-GCA_900067695.1-2016-11-09.one_line	11960690255	25	4	CTGN_1233	1125	25.2444	24.2667	27.0222	30.1333	41.6889	32.3556	35.5556
DNA-Genome-Picea-abies-GCA_900067695.1-2016-11-09.one_line	11960690255	25	4	GNAC_1233	1100	18.1818	20.4545	20.1818	21.7273	34.8182	25.2727	28.3636
DNA-Genome-Picea-abies-GCA_900067695.1-2016-11-09.one_line	11960690255	25	4	T_1	1075	2.9767	1.1163	6.3256	4.186	13.6744	4.093	7.0698
DNA-Genome-Picea-abies-GCA_900067695.1-2016-11-09.one_line	11960690255	25	4	GTCN_1233	1050	25.4286	24.4762	27.0476	30.6667	43.0476	33.0476	36.1905
DNA-Genome-Picea-abies-GCA_900067695.1-2016-11-09.one_line	11960690255	25	4	CNAG_1233	975	18.1538	19.7949	20.1026	21.641	35.1795	24.6154	27.8974
DNA-Genome-Picea-abies-GCA_900067695.1-2016-11-09.one_line	11960690255	25	4	CNTG_1233	950	20.2105	21.1579	21.4737	23.8947	37.3684	26.4211	29.8947
DNA-Genome-Picea-abies-GCA_900067695.1-2016-11-09.one_line	11960690255	25	4	GNCT_1233	925	19.3514	20	20.5405	22.7027	36.5405	24.5405	28.1081
DNA-Genome-Picea-abies-GCA_900067695.1-2016-11-09.one_line	11960690255	25	4	CN_11	900	9.4444	9.7778	12.6667	12.4444	32.3333	13.6667	16.8889
DNA-Genome-Picea-abies-GCA_900067695.1-2016-11-09.one_line	11960690255	25	4	CAGN_1233	850	24.7059	25.1765	27.2941	29.7647	45.7647	33.5294	37.6471
DNA-Genome-Picea-abies-GCA_900067695.1-2016-11-09.one_line	11960690255	25	4	NCTG_1233	725	24.5517	24.4138	25.931	27.0345	47.0345	32.6897	37.5172
DNA-Genome-Picea-abies-GCA_900067695.1-2016-11-09.one_line	11960690255	25	4	NCT_122	675	16	13.9259	18.0741	16.1481	36.4444	18.2222	23.1111
DNA-Genome-Picea-abies-GCA_900067695.1-2016-11-09.one_line	11960690255	25	4	GCNA_1234	500	34.2	32.2	38.8	38.6	65.4	44.4	51.2
DNA-Genome-Picea-abies-GCA_900067695.1-2016-11-09.one_line	11960690255	25	4	NGAC_1233	450	27.1111	27.3333	31.1111	30.4444	60.2222	37.1111	44.4444
DNA-Genome-Picea-abies-GCA_900067695.1-2016-11-09.one_line	11960690255	25	4	NAC_122	450	18.4444	15.5556	22.6667	19.5556	49.7778	22.4444	30.2222
DNA-Genome-Picea-abies-GCA_900067695.1-2016-11-09.one_line	11960690255	25	4	NAG_122	425	19.5294	16.9412	23.5294	20.2353	48.9412	23.5294	31.0588
DNA-Genome-Picea-abies-GCA_900067695.1-2016-11-09.one_line	11960690255	25	4	CGNA_1234	425	35.7647	32.9412	40.4706	39.5294	68.7059	44.2353	51.7647
DNA-Genome-Picea-abies-GCA_900067695.1-2016-11-09.one_line	11960690255	25	4	NTG_122	375	22.1333	19.7333	25.6	23.2	52.5333	24.8	34.1333
DNA-Genome-Picea-abies-GCA_900067695.1-2016-11-09.one_line	11960690255	25	4	NCAG_1233	350	30.2857	26.8571	34.8571	34.2857	69.7143	40	49.1429
DNA-Genome-Picea-abies-GCA_900067695.1-2016-11-09.one_line	11960690255	25	4	CGAN_1233	325	33.5385	27.3846	40	39.3846	75.6923	43.6923	54.1538
DNA-Genome-Picea-abies-GCA_900067695.1-2016-11-09.one_line	11960690255	25	4	NGCT_1233	300	35.3333	30.6667	39.3333	36	79.3333	44.6667	56
DNA-Genome-Picea-abies-GCA_900067695.1-2016-11-09.one_line	11960690255	25	4	GCTN_1233	300	35.6667	27.3333	40.6667	40.3333	80.3333	45.6667	57.3333
DNA-Genome-Picea-abies-GCA_900067695.1-2016-11-09.one_line	11960690255	25	4	CGN_122	250	27.2	19.6	35.2	32.4	74.8	33.2	46.4
DNA-Genome-Picea-abies-GCA_900067695.1-2016-11-09.one_line	11960690255	25	4	GCN_122	200	31.5	23	41	36.5	86	34	50
DNA-Genome-Picea-abies-GCA_900067695.1-2016-11-09.one_line	11960690255	25	4	GCAN_1233	125	55.2	39.2	73.6	64	153.6	70.4	92.8
DNA-Genome-Picea-abies-GCA_900067695.1-2016-11-09.one_line	11960690255	25	4	CGTN_1233	25	160	84	284	192	640	212	336
DNA-Genome-Picea-abies-GCA_900067695.1-2016-11-09.one_line	11960690255	50	4	ACTG_2222	5446604655	23.896	21.1679	23.7993	26.9721	19.7167	22.0486	22.0825
DNA-Genome-Picea-abies-GCA_900067695.1-2016-11-09.one_line	11960690255	50	4	TACG_1233	2195615150	22.5652	21.446	22.8283	26.1771	20.9195	22.5793	22.6015
DNA-Genome-Picea-abies-GCA_900067695.1-2016-11-09.one_line	11960690255	50	4	ATCG_1233	1944557850	22.5166	21.4238	22.7891	26.1468	20.9513	22.5849	22.6066
DNA-Genome-Picea-abies-GCA_900067695.1-2016-11-09.one_line	11960690255	50	4	TCAG_1233	574008800	21.8816	20.5003	21.8815	25.9884	19.6284	21.3581	21.4002
DNA-Genome-Picea-abies-GCA_900067695.1-2016-11-09.one_line	11960690255	50	4	AGCT_1233	495234200	21.8992	20.5906	21.9408	25.9309	19.7725	21.4573	21.5004
DNA-Genome-Picea-abies-GCA_900067695.1-2016-11-09.one_line	11960690255	50	4	ACTG_1233	462827850	21.8632	20.7012	21.9076	25.9516	19.973	21.6546	21.6882
DNA-Genome-Picea-abies-GCA_900067695.1-2016-11-09.one_line	11960690255	50	4	TGAC_1233	358656900	21.7695	20.5896	21.7564	25.7893	19.9071	21.5449	21.5759
DNA-Genome-Picea-abies-GCA_900067695.1-2016-11-09.one_line	11960690255	50	4	GACT_1233	120171150	21.152	20.083	21.0949	25.5622	19.2804	20.7073	20.7372
DNA-Genome-Picea-abies-GCA_900067695.1-2016-11-09.one_line	11960690255	50	4	CTAG_1233	114135750	20.6998	19.6005	20.625	25.3045	18.8319	20.2809	20.2941
DNA-Genome-Picea-abies-GCA_900067695.1-2016-11-09.one_line	11960690255	50	4	CATG_1233	93491350	20.6828	19.643	20.5558	25.3364	18.9446	20.2439	20.2398
DNA-Genome-Picea-abies-GCA_900067695.1-2016-11-09.one_line	11960690255	50	4	GTAC_1233	74685750	20.862	19.8581	20.661	25.3775	19.2972	20.4357	20.4382
DNA-Genome-Picea-abies-GCA_900067695.1-2016-11-09.one_line	11960690255	50	4	ACT_122	12278600	16.4165	16.6859	16.7233	20.4407	17.1697	17.3562	17.1766
DNA-Genome-Picea-abies-GCA_900067695.1-2016-11-09.one_line	11960690255	50	4	TAG_122	11023000	16.4036	16.7098	16.7279	20.371	17.2156	17.3899	17.2066
DNA-Genome-Picea-abies-GCA_900067695.1-2016-11-09.one_line	11960690255	50	4	ATG_122	10105350	16.5521	16.7903	16.8391	20.5	17.3648	17.5194	17.3419
DNA-Genome-Picea-abies-GCA_900067695.1-2016-11-09.one_line	11960690255	50	4	TAC_122	9570350	16.4914	16.6798	16.7586	20.4144	17.2721	17.4321	17.2481
DNA-Genome-Picea-abies-GCA_900067695.1-2016-11-09.one_line	11960690255	50	4	GCAT_1233	7113100	18.9122	18.6308	19.0198	23.226	18.7936	18.8724	18.7936
DNA-Genome-Picea-abies-GCA_900067695.1-2016-11-09.one_line	11960690255	50	4	CGAT_1233	6902650	18.7259	18.4512	18.8214	23.0654	18.6124	18.6806	18.6133
DNA-Genome-Picea-abies-GCA_900067695.1-2016-11-09.one_line	11960690255	50	4	CAT_122	4136150	15.3443	16.1918	15.5642	19.0916	16.2054	16.3134	16.1786
DNA-Genome-Picea-abies-GCA_900067695.1-2016-11-09.one_line	11960690255	50	4	ATGC_2223	3594700	23.5933	24.6979	23.9938	27.1123	24.2659	24.2377	24.2678
DNA-Genome-Picea-abies-GCA_900067695.1-2016-11-09.one_line	11960690255	50	4	ACTG_2223	3246500	23.4438	24.5222	23.8769	27.0641	24.1289	24.1008	24.1109
DNA-Genome-Picea-abies-GCA_900067695.1-2016-11-09.one_line	11960690255	50	4	GAT_122	2866500	15.6045	16.4073	15.8324	19.1966	16.5166	16.6127	16.4909
DNA-Genome-Picea-abies-GCA_900067695.1-2016-11-09.one_line	11960690255	50	4	AT_11	1456500	7.3686	8.1057	7.4604	9.6176	9.0591	9.4695	9.0483
DNA-Genome-Picea-abies-GCA_900067695.1-2016-11-09.one_line	11960690255	50	4	CTGA_2223	795300	23.9876	25.1703	24.4818	26.7615	24.9398	24.9332	24.9169
DNA-Genome-Picea-abies-GCA_900067695.1-2016-11-09.one_line	11960690255	50	4	ATNC_2223	722800	21.3042	24.1197	21.9447	24.3675	23.6551	23.6462	23.6198
DNA-Genome-Picea-abies-GCA_900067695.1-2016-11-09.one_line	11960690255	50	4	ACGT_2223	698800	24.007	25.2577	24.5146	26.8052	25.0585	25.077	25.0321
DNA-Genome-Picea-abies-GCA_900067695.1-2016-11-09.one_line	11960690255	50	4	ATGC_1234	578200	23.1422	23.8616	23.8661	26.5294	24.5835	24.5543	24.5403
DNA-Genome-Picea-abies-GCA_900067695.1-2016-11-09.one_line	11960690255	50	4	TAGC_1234	549300	23.0768	23.7903	23.8067	26.5145	24.529	24.4995	24.4995
DNA-Genome-Picea-abies-GCA_900067695.1-2016-11-09.one_line	11960690255	50	4	ATCG_1234	498400	23.0142	23.735	23.7584	26.4757	24.4799	24.4669	24.4342
DNA-Genome-Picea-abies-GCA_900067695.1-2016-11-09.one_line	11960690255	50	4	TACG_1234	475550	22.998	23.6577	23.7519	26.4218	24.4666	24.3873	24.4037
DNA-Genome-Picea-abies-GCA_900067695.1-2016-11-09.one_line	11960690255	50	4	TACG_1333	356000	21.6949	23.8567	22.4017	25.0407	23.5525	23.4958	23.5202
DNA-Genome-Picea-abies-GCA_900067695.1-2016-11-09.one_line	11960690255	50	4	ACTG_1333	354800	21.7139	23.7573	22.4262	25.0967	23.52	23.4428	23.4735
DNA-Genome-Picea-abies-GCA_900067695.1-2016-11-09.one_line	11960690255	50	4	AGTC_1234	217000	23.1724	23.9765	23.9198	26.6203	24.9484	24.8562	24.9364
DNA-Genome-Picea-abies-GCA_900067695.1-2016-11-09.one_line	11960690255	50	4	TCAG_1234	206350	22.9513	23.6516	23.6928	26.33	24.6082	24.5636	24.5253
DNA-Genome-Picea-abies-GCA_900067695.1-2016-11-09.one_line	11960690255	50	4	ACTG_1234	192000	22.6563	23.3667	23.3823	26.0047	24.399	24.2542	24.2813
DNA-Genome-Picea-abies-GCA_900067695.1-2016-11-09.one_line	11960690255	50	4	CTNA_2223	176900	21.3431	24.3166	22.0961	24.5297	24.4014	24.4076	24.3912
DNA-Genome-Picea-abies-GCA_900067695.1-2016-11-09.one_line	11960690255	50	4	AGNC_2223	167300	21.3724	24.3126	22.1148	24.4573	24.5678	24.5505	24.4806
DNA-Genome-Picea-abies-GCA_900067695.1-2016-11-09.one_line	11960690255	50	4	ACNT_2223	155850	21.2268	23.9621	21.9262	24.1527	24.1829	24.1514	24.1155
DNA-Genome-Picea-abies-GCA_900067695.1-2016-11-09.one_line	11960690255	50	4	TGAC_1234	153950	22.8094	23.6044	23.5453	26.102	24.7912	24.5995	24.595
DNA-Genome-Picea-abies-GCA_900067695.1-2016-11-09.one_line	11960690255	50	4	ACG_122	145350	13.9938	14.1163	14.2814	16.3825	15.2453	15.0581	14.9377
DNA-Genome-Picea-abies-GCA_900067695.1-2016-11-09.one_line	11960690255	50	4	TCG_122	142400	13.9888	14.2015	14.2739	16.3989	15.3553	15.2346	15.1292
DNA-Genome-Picea-abies-GCA_900067695.1-2016-11-09.one_line	11960690255	50	4	TGNA_2223	140550	21.1953	24.0021	21.9139	24.1274	24.2092	24.1693	24.1537
DNA-Genome-Picea-abies-GCA_900067695.1-2016-11-09.one_line	11960690255	50	4	ATNC_1234	134150	19.9202	22.0634	20.823	23.9821	22.9884	22.773	22.8013
DNA-Genome-Picea-abies-GCA_900067695.1-2016-11-09.one_line	11960690255	50	4	CT_11	134050	6.038	7.5517	6.2051	7.6136	8.1992	8.5513	8.0239
DNA-Genome-Picea-abies-GCA_900067695.1-2016-11-09.one_line	11960690255	50	4	TANC_1234	127050	19.9331	22.0331	20.8564	23.9937	22.8855	22.7092	22.7501
DNA-Genome-Picea-abies-GCA_900067695.1-2016-11-09.one_line	11960690255	50	4	AG_11	114250	5.9589	7.3996	6.1724	7.4608	8.1374	8.4298	7.8915
DNA-Genome-Picea-abies-GCA_900067695.1-2016-11-09.one_line	11960690255	50	4	TCGA_1234	84450	23.5808	24.7732	24.5613	27.2647	26.3919	26.2451	26.2735
DNA-Genome-Picea-abies-GCA_900067695.1-2016-11-09.one_line	11960690255	50	4	ACGT_1234	68050	23.2623	24.0456	24.1734	26.6995	25.8942	25.6106	25.6988
DNA-Genome-Picea-abies-GCA_900067695.1-2016-11-09.one_line	11960690255	50	4	CTAG_1234	65100	23.3149	24.3794	24.3103	27.0998	26.3103	26.0476	26.0768
DNA-Genome-Picea-abies-GCA_900067695.1-2016-11-09.one_line	11960690255	50	4	GATC_1234	60750	23.2609	24.5695	24.2436	27.1523	26.377	26.2173	26.2255
DNA-Genome-Picea-abies-GCA_900067695.1-2016-11-09.one_line	11960690255	50	4	TGCA_1234	59200	23.3378	24.2365	24.2669	26.7855	26.1706	25.8446	25.9595
DNA-Genome-Picea-abies-GCA_900067695.1-2016-11-09.one_line	11960690255	50	4	AGCT_1234	52900	23.6975	24.8147	24.7486	27.4178	26.8677	26.7183	26.7826
DNA-Genome-Picea-abies-GCA_900067695.1-2016-11-09.one_line	11960690255	50	4	CTG_122	50100	12.9541	15.006	13.4212	16.012	15.6647	15.1317	15.1297
DNA-Genome-Picea-abies-GCA_900067695.1-2016-11-09.one_line	11960690255	50	4	ATN_122	47550	4.1577	5.0894	4.3197	5.6635	8.2776	6.2965	5.8465
DNA-Genome-Picea-abies-GCA_900067695.1-2016-11-09.one_line	11960690255	50	4	AC_11	43250	2.1873	2.9434	2.5295	3.1514	4.4763	3.7688	3.6439
DNA-Genome-Picea-abies-GCA_900067695.1-2016-11-09.one_line	11960690255	50	4	CATG_1234	42800	23.486	24.6776	24.528	27.3341	26.7687	26.5	26.5794
DNA-Genome-Picea-abies-GCA_900067695.1-2016-11-09.one_line	11960690255	50	4	TG_11	40300	2.3127	3.0422	2.6799	3.2754	4.7171	3.871	3.7618
DNA-Genome-Picea-abies-GCA_900067695.1-2016-11-09.one_line	11960690255	50	4	GTAC_1234	37850	23.4425	24.5495	24.4967	27.1704	26.8269	26.4729	26.5152
DNA-Genome-Picea-abies-GCA_900067695.1-2016-11-09.one_line	11960690255	50	4	GAC_122	35000	13.4829	15.4714	14.04	16.6343	16.5771	15.9629	16
DNA-Genome-Picea-abies-GCA_900067695.1-2016-11-09.one_line	11960690255	50	4	AGNC_1234	27950	19.8998	21.8819	21.0662	24.0107	24.0179	23.5277	23.585
DNA-Genome-Picea-abies-GCA_900067695.1-2016-11-09.one_line	11960690255	50	4	TCNA_1234	27200	19.9338	21.9743	21.1324	24.1397	24.1838	23.5882	23.8529
DNA-Genome-Picea-abies-GCA_900067695.1-2016-11-09.one_line	11960690255	50	4	TAGN_1233	23250	15.0237	16.7054	15.6645	18.1763	19.5484	18.1505	18.0129
DNA-Genome-Picea-abies-GCA_900067695.1-2016-11-09.one_line	11960690255	50	4	CATG_1333	21700	21.5806	24.2995	22.6452	25	25.9816	25.4977	25.6406
DNA-Genome-Picea-abies-GCA_900067695.1-2016-11-09.one_line	11960690255	50	4	GACT_1333	20500	21.4195	23.922	22.478	24.6927	25.6634	25.1366	25.3268
DNA-Genome-Picea-abies-GCA_900067695.1-2016-11-09.one_line	11960690255	50	4	CTGA_1234	19950	24.2707	25.1729	25.5639	28.0301	28.6065	28.0201	28.1704
DNA-Genome-Picea-abies-GCA_900067695.1-2016-11-09.one_line	11960690255	50	4	ATCN_1233	19650	15.6845	17.5165	16.3664	18.9822	20.2952	18.9313	18.9109
DNA-Genome-Picea-abies-GCA_900067695.1-2016-11-09.one_line	11960690255	50	4	TACN_1233	19400	14.5722	16.3454	15.299	17.7423	19.5825	18.0052	17.8557
DNA-Genome-Picea-abies-GCA_900067695.1-2016-11-09.one_line	11960690255	50	4	TAN_122	18550	4.7709	5.8706	5.1213	6.4151	10.0701	7.2075	6.7709
DNA-Genome-Picea-abies-GCA_900067695.1-2016-11-09.one_line	11960690255	50	4	CGNA_2223	18250	22.1041	24.6959	23.1781	24.9699	26.9041	26.3288	26.4986
DNA-Genome-Picea-abies-GCA_900067695.1-2016-11-09.one_line	11960690255	50	4	ATGN_1233	18250	15.6438	17.1397	16.3288	18.7342	20.2356	18.663	18.5644
DNA-Genome-Picea-abies-GCA_900067695.1-2016-11-09.one_line	11960690255	50	4	TGNA_1234	17500	19.8571	21.5657	21.0857	23.6571	24.5086	23.6514	23.9086
DNA-Genome-Picea-abies-GCA_900067695.1-2016-11-09.one_line	11960690255	50	4	ACNT_1234	17400	19.9655	21.5747	21.1724	23.7759	24.5115	23.6839	23.8621
DNA-Genome-Picea-abies-GCA_900067695.1-2016-11-09.one_line	11960690255	50	4	CAGT_1234	12300	24.2114	24.9593	25.561	27.878	28.7967	27.9268	28.1626
DNA-Genome-Picea-abies-GCA_900067695.1-2016-11-09.one_line	11960690255	50	4	GACT_1234	12100	24.3388	25.3306	25.8182	28.124	29.2149	28.4959	28.6612
DNA-Genome-Picea-abies-GCA_900067695.1-2016-11-09.one_line	11960690255	50	4	GTCA_1234	11500	24.113	25.2348	25.4609	27.6174	29.1826	28.2174	28.487
DNA-Genome-Picea-abies-GCA_900067695.1-2016-11-09.one_line	11960690255	50	4	GANC_1234	10000	19.98	22.07	21.52	24.43	25.98	24.82	25.12
DNA-Genome-Picea-abies-GCA_900067695.1-2016-11-09.one_line	11960690255	50	4	TCAN_1233	9750	15.6923	17.6103	16.5128	19.0462	21.8154	19.7026	19.7333
DNA-Genome-Picea-abies-GCA_900067695.1-2016-11-09.one_line	11960690255	50	4	CTNA_1234	8800	20.0455	22.1591	21.5227	24.4205	26.3636	24.7841	25.1818
DNA-Genome-Picea-abies-GCA_900067695.1-2016-11-09.one_line	11960690255	50	4	AGTN_1233	8700	16.6322	17.931	17.4023	19.8046	21.931	20.023	20.3218
DNA-Genome-Picea-abies-GCA_900067695.1-2016-11-09.one_line	11960690255	50	4	ATGN_2222	8350	19.8084	23.2695	20.6946	23.2695	25.1257	23.7365	24
DNA-Genome-Picea-abies-GCA_900067695.1-2016-11-09.one_line	11960690255	50	4	CAG_122	8050	12.7453	13.0559	13.6149	15.2795	17.7267	15.4161	15.7516
DNA-Genome-Picea-abies-GCA_900067695.1-2016-11-09.one_line	11960690255	50	4	GATN_1233	8000	16.9375	18.8625	17.775	20.65	22.5	20.6125	20.95
DNA-Genome-Picea-abies-GCA_900067695.1-2016-11-09.one_line	11960690255	50	4	ACTN_2222	7750	20.2968	23.5613	21.1613	23.6903	25.5742	24.1935	24.6194
DNA-Genome-Picea-abies-GCA_900067695.1-2016-11-09.one_line	11960690255	50	4	GCT_122	7100	11.507	11.9577	12.338	14.0141	16.9437	14.6056	14.7042
DNA-Genome-Picea-abies-GCA_900067695.1-2016-11-09.one_line	11960690255	50	4	CTAN_1233	7050	17.8156	19.8723	18.8369	21.8865	24.3688	21.8298	22.4113
DNA-Genome-Picea-abies-GCA_900067695.1-2016-11-09.one_line	11960690255	50	4	CTN_122	6450	5.3643	6.3411	6.0465	7.0698	12.6047	7.5659	7.814
DNA-Genome-Picea-abies-GCA_900067695.1-2016-11-09.one_line	11960690255	50	4	ACTN_1233	5800	17.3621	18.6552	18.0345	20.6552	23.5517	20.8276	21.3793
DNA-Genome-Picea-abies-GCA_900067695.1-2016-11-09.one_line	11960690255	50	4	AGN_122	5250	5.6	6.7619	6.4	7.3714	13.3714	8.2667	8.381
DNA-Genome-Picea-abies-GCA_900067695.1-2016-11-09.one_line	11960690255	50	4	ANTC_1234	4950	17.6162	19.8182	19.1111	21.2727	25.7172	23.7172	24.3232
DNA-Genome-Picea-abies-GCA_900067695.1-2016-11-09.one_line	11960690255	50	4	TGAN_1233	4700	18.1489	19.8723	19.0638	22.0213	25.383	22.2979	23.0638
DNA-Genome-Picea-abies-GCA_900067695.1-2016-11-09.one_line	11960690255	50	4	TNAC_1234	4550	17.5824	19.8681	19.1648	20.8791	26.1758	23.4066	24.2637
DNA-Genome-Picea-abies-GCA_900067695.1-2016-11-09.one_line	11960690255	50	4	GTNA_1234	4100	21.4634	23	23.0244	25.7561	29.5122	26.9512	27.8049
DNA-Genome-Picea-abies-GCA_900067695.1-2016-11-09.one_line	11960690255	50	4	CANT_1234	4100	21.7073	23.561	23.5122	25.7073	29.9756	27.3902	28.2927
DNA-Genome-Picea-abies-GCA_900067695.1-2016-11-09.one_line	11960690255	50	4	ACN_122	3950	6.0759	6.962	7.038	8.1266	14.2532	8.7089	8.9114
DNA-Genome-Picea-abies-GCA_900067695.1-2016-11-09.one_line	11960690255	50	4	CATN_1233	3950	18.0253	19.6962	19.0886	21.5443	27.1646	22.7595	23.5949
DNA-Genome-Picea-abies-GCA_900067695.1-2016-11-09.one_line	11960690255	50	4	GCTA_1234	3800	25.5263	26.3947	27.3684	29.6053	34.5526	31.6579	32.5263
DNA-Genome-Picea-abies-GCA_900067695.1-2016-11-09.one_line	11960690255	50	4	CGTA_1234	3700	26.2432	26.7568	28.2703	30.2973	35.2432	32.4324	33.2973
DNA-Genome-Picea-abies-GCA_900067695.1-2016-11-09.one_line	11960690255	50	4	CGAT_1234	3350	25.791	26.2388	27.7612	29.5821	34.6866	31.5522	32.597
DNA-Genome-Picea-abies-GCA_900067695.1-2016-11-09.one_line	11960690255	50	4	GCAT_1234	3300	26.5758	26.697	28.7273	30.8788	36.3333	33.1212	34.1818
DNA-Genome-Picea-abies-GCA_900067695.1-2016-11-09.one_line	11960690255	50	4	TGN_122	2900	7.069	7.5862	8	9.1034	16.5172	9.6897	10.3448
DNA-Genome-Picea-abies-GCA_900067695.1-2016-11-09.one_line	11960690255	50	4	TCN_122	2750	8.0727	8.9818	9.1636	10.1455	17.6364	10.4727	11.2
DNA-Genome-Picea-abies-GCA_900067695.1-2016-11-09.one_line	11960690255	50	4	TNGA_1234	2400	19.25	20.875	21.3333	22.8333	30.3333	25.4167	26.8333
DNA-Genome-Picea-abies-GCA_900067695.1-2016-11-09.one_line	11960690255	50	4	ANGC_1234	2400	20	21.75	21.9167	23.6667	31.2917	26.7917	28.1667
DNA-Genome-Picea-abies-GCA_900067695.1-2016-11-09.one_line	11960690255	50	4	GTAN_1233	2400	18.8333	19.75	19.9167	22.75	29.3333	23.6667	25
DNA-Genome-Picea-abies-GCA_900067695.1-2016-11-09.one_line	11960690255	50	4	TNCA_1234	2400	19.4583	20.9583	21.4167	23.1667	30.4167	26	27.3333
DNA-Genome-Picea-abies-GCA_900067695.1-2016-11-09.one_line	11960690255	50	4	GAN_122	2300	7.6087	8.2609	8.7826	9.1304	18.6957	10.3043	11.3043
DNA-Genome-Picea-abies-GCA_900067695.1-2016-11-09.one_line	11960690255	50	4	ANCT_1234	1350	22	23.1852	24.1481	25.6296	36.5926	28.963	31.4074
DNA-Genome-Picea-abies-GCA_900067695.1-2016-11-09.one_line	11960690255	50	4	GTN_122	1250	9.28	8.48	10.56	10.8	23.92	11.6	13.76
DNA-Genome-Picea-abies-GCA_900067695.1-2016-11-09.one_line	11960690255	50	4	CAN_122	1250	8.8	8.16	10.4	10.08	23.68	11.2	12.48
DNA-Genome-Picea-abies-GCA_900067695.1-2016-11-09.one_line	11960690255	50	4	GNTA_1234	1100	21.1818	21.4545	23.0909	24.1818	38.5455	28.4545	31.6364
DNA-Genome-Picea-abies-GCA_900067695.1-2016-11-09.one_line	11960690255	50	4	CNTA_1234	800	23.625	23	26	27.625	44.25	31.25	35.5
DNA-Genome-Picea-abies-GCA_900067695.1-2016-11-09.one_line	11960690255	50	4	TNAC_1233	750	19.3333	19.0667	21.6	23.8667	41.4667	25.4667	29.8667
DNA-Genome-Picea-abies-GCA_900067695.1-2016-11-09.one_line	11960690255	50	4	ACGN_1233	750	21.7333	21.0667	24.5333	25.0667	43.4667	28.1333	32.5333
DNA-Genome-Picea-abies-GCA_900067695.1-2016-11-09.one_line	11960690255	50	4	TNAG_1233	750	19.3333	19.2	21.3333	23.3333	38.9333	24	28.2667
DNA-Genome-Picea-abies-GCA_900067695.1-2016-11-09.one_line	11960690255	50	4	AGCN_1233	700	20.7143	18.5714	23.4286	24.2857	43.2857	25.7143	30.2857
DNA-Genome-Picea-abies-GCA_900067695.1-2016-11-09.one_line	11960690255	50	4	GNAC_1234	650	24	22.7692	27.0769	28.3077	47.8462	30.9231	35.6923
DNA-Genome-Picea-abies-GCA_900067695.1-2016-11-09.one_line	11960690255	50	4	GCNA_1234	650	27.3846	25.3846	29.8462	31.2308	50.6154	34.6154	40
DNA-Genome-Picea-abies-GCA_900067695.1-2016-11-09.one_line	11960690255	50	4	TCGN_1233	600	22.6667	18.5	24.6667	24.8333	49.6667	28.1667	33.3333
DNA-Genome-Picea-abies-GCA_900067695.1-2016-11-09.one_line	11960690255	50	4	GACN_1233	600	20.8333	18.5	24	23.8333	49.5	25.3333	30.6667
DNA-Genome-Picea-abies-GCA_900067695.1-2016-11-09.one_line	11960690255	50	4	ANCT_1233	500	23.2	21.2	25.6	25.8	51.2	28.8	35.2
DNA-Genome-Picea-abies-GCA_900067695.1-2016-11-09.one_line	11960690255	50	4	CGNA_1234	500	32.6	27.8	36	36.8	61	40.2	47.2
DNA-Genome-Picea-abies-GCA_900067695.1-2016-11-09.one_line	11960690255	50	4	ANTG_1233	400	27.75	25	31	30.75	61.25	35.25	44
DNA-Genome-Picea-abies-GCA_900067695.1-2016-11-09.one_line	11960690255	50	4	CNAT_1234	400	30	26.25	34.5	32.5	64.25	38.25	47
DNA-Genome-Picea-abies-GCA_900067695.1-2016-11-09.one_line	11960690255	50	4	GTCN_1233	350	28.8571	21.7143	32	31.1429	61.1429	31.7143	41.1429
DNA-Genome-Picea-abies-GCA_900067695.1-2016-11-09.one_line	11960690255	50	4	TGCN_1233	300	29.6667	21.3333	33.3333	30.6667	70	33	44
DNA-Genome-Picea-abies-GCA_900067695.1-2016-11-09.one_line	11960690255	50	4	CTGN_1233	300	28	20.6667	32.6667	29.6667	70	34.3333	44
DNA-Genome-Picea-abies-GCA_900067695.1-2016-11-09.one_line	11960690255	50	4	GNAT_1233	300	30	23.6667	34	34.6667	72.3333	35	46.6667
DNA-Genome-Picea-abies-GCA_900067695.1-2016-11-09.one_line	11960690255	50	4	TNCG_1233	200	35	26	44	40	97	42.5	60
DNA-Genome-Picea-abies-GCA_900067695.1-2016-11-09.one_line	11960690255	50	4	CNGA_1234	150	47.3333	34.6667	60	52.6667	126	56.6667	80
DNA-Genome-Picea-abies-GCA_900067695.1-2016-11-09.one_line	11960690255	50	4	GNCA_1234	150	48	35.3333	61.3333	53.3333	127.333	58	80
DNA-Genome-Picea-abies-GCA_900067695.1-2016-11-09.one_line	11960690255	50	4	ANCG_1233	100	51	37	74	58	165	61	92
DNA-Genome-Picea-abies-GCA_900067695.1-2016-11-09.one_line	11960690255	50	4	CTGN_2222	100	68	45	86	77	182	79	108
DNA-Genome-Picea-abies-GCA_900067695.1-2016-11-09.one_line	11960690255	50	4	CAGN_1233	100	47	24	72	50	163	53	80
DNA-Genome-Picea-abies-GCA_900067695.1-2016-11-09.one_line	11960690255	50	4	CNAT_1233	100	56	35	76	69	168	64	92
DNA-Genome-Picea-abies-GCA_900067695.1-2016-11-09.one_line	11960690255	50	4	GCAN_1233	100	60	40	82	67	172	68	96
DNA-Genome-Picea-abies-GCA_900067695.1-2016-11-09.one_line	11960690255	50	4	CNTG_1233	50	78	42	132	102	302	94	152
DNA-Genome-Picea-abies-GCA_900067695.1-2016-11-09.one_line	11960690255	50	4	ACGN_2222	50	98	48	148	110	370	120	176
DNA-Genome-Picea-abies-GCA_900067695.1-2016-11-09.one_line	11960690255	100	4	ACTG_2222	6331233200	23.8075	20.2031	23.6865	26.9692	18.3976	21.036	21.0659
DNA-Genome-Picea-abies-GCA_900067695.1-2016-11-09.one_line	11960690255	100	4	TACG_1233	2182056555	22.6648	20.847	22.8418	26.2682	19.832	21.8978	21.9035
DNA-Genome-Picea-abies-GCA_900067695.1-2016-11-09.one_line	11960690255	100	4	ATCG_1233	2063502800	22.6559	20.8508	22.8425	26.2622	19.8469	21.91	21.9169
DNA-Genome-Picea-abies-GCA_900067695.1-2016-11-09.one_line	11960690255	100	4	TCAG_1233	392942100	21.4836	19.0492	21.2806	25.8872	17.6788	19.6955	19.6691
DNA-Genome-Picea-abies-GCA_900067695.1-2016-11-09.one_line	11960690255	100	4	AGCT_1233	349911700	21.5427	19.1704	21.4211	25.8686	17.8295	19.8121	19.788
DNA-Genome-Picea-abies-GCA_900067695.1-2016-11-09.one_line	11960690255	100	4	ACTG_1233	245865700	21.2686	19.063	21.1261	25.7318	17.8624	19.9038	19.8359
DNA-Genome-Picea-abies-GCA_900067695.1-2016-11-09.one_line	11960690255	100	4	TGAC_1233	201952200	21.2148	18.9943	21.0202	25.6003	17.8526	19.8291	19.7611
DNA-Genome-Picea-abies-GCA_900067695.1-2016-11-09.one_line	11960690255	100	4	CTAG_1233	56667500	19.5995	17.8117	19.3926	24.5127	17.1189	18.4297	18.2937
DNA-Genome-Picea-abies-GCA_900067695.1-2016-11-09.one_line	11960690255	100	4	GACT_1233	47696500	20.0987	18.3564	19.9338	24.9399	17.7805	18.866	18.7724
DNA-Genome-Picea-abies-GCA_900067695.1-2016-11-09.one_line	11960690255	100	4	CATG_1233	28774400	18.909	17.2171	18.6162	24.2434	16.9671	17.7163	17.4879
DNA-Genome-Picea-abies-GCA_900067695.1-2016-11-09.one_line	11960690255	100	4	GTAC_1233	22058000	19.3858	17.7233	18.9104	24.4324	17.5473	18.0851	17.8891
DNA-Genome-Picea-abies-GCA_900067695.1-2016-11-09.one_line	11960690255	100	4	ATGC_2223	8231900	22.7111	22.0992	22.946	26.5322	21.6293	21.6613	21.6168
DNA-Genome-Picea-abies-GCA_900067695.1-2016-11-09.one_line	11960690255	100	4	ACTG_2223	7899300	22.5914	21.9681	22.8461	26.5009	21.5277	21.5672	21.5193
DNA-Genome-Picea-abies-GCA_900067695.1-2016-11-09.one_line	11960690255	100	4	CGAT_1233	2328800	17.3789	16.6465	17.4577	20.6159	16.7456	16.9337	16.7305
DNA-Genome-Picea-abies-GCA_900067695.1-2016-11-09.one_line	11960690255	100	4	GCAT_1233	2085800	17.6571	16.8701	17.7368	20.8001	16.9929	17.1636	16.9729
DNA-Genome-Picea-abies-GCA_900067695.1-2016-11-09.one_line	11960690255	100	4	TAGC_1234	1658000	22.0655	21.5033	22.4951	25.3431	21.8344	21.7665	21.7587
DNA-Genome-Picea-abies-GCA_900067695.1-2016-11-09.one_line	11960690255	100	4	ATGC_1234	1630800	22.1219	21.5552	22.5488	25.3489	21.8366	21.7663	21.7694
DNA-Genome-Picea-abies-GCA_900067695.1-2016-11-09.one_line	11960690255	100	4	ATCG_1234	1561800	21.9699	21.4031	22.4149	25.2909	21.7502	21.6835	21.6668
DNA-Genome-Picea-abies-GCA_900067695.1-2016-11-09.one_line	11960690255	100	4	TACG_1234	1485200	21.9917	21.3769	22.4245	25.2547	21.6736	21.6243	21.5866
DNA-Genome-Picea-abies-GCA_900067695.1-2016-11-09.one_line	11960690255	100	4	ACT_122	1258700	15.5567	16.012	15.9037	18.912	16.4427	16.5093	16.4049
DNA-Genome-Picea-abies-GCA_900067695.1-2016-11-09.one_line	11960690255	100	4	CTGA_2223	1217500	23.3071	22.8925	23.5877	26.0269	22.6181	22.5812	22.5603
DNA-Genome-Picea-abies-GCA_900067695.1-2016-11-09.one_line	11960690255	100	4	TAG_122	1167100	15.5635	16.0745	15.9498	18.9072	16.4862	16.5533	16.4466
DNA-Genome-Picea-abies-GCA_900067695.1-2016-11-09.one_line	11960690255	100	4	ACGT_2223	1070000	23.4421	23.0775	23.7357	26.0581	22.8216	22.7842	22.7634
DNA-Genome-Picea-abies-GCA_900067695.1-2016-11-09.one_line	11960690255	100	4	CAT_122	902900	14.3222	16.1126	14.651	17.6216	15.5904	15.5961	15.5069
DNA-Genome-Picea-abies-GCA_900067695.1-2016-11-09.one_line	11960690255	100	4	ATG_122	827600	15.9103	16.2322	16.2608	18.9544	16.8284	16.8967	16.7593
DNA-Genome-Picea-abies-GCA_900067695.1-2016-11-09.one_line	11960690255	100	4	TAC_122	803400	15.9081	16.1621	16.2397	18.9373	16.7474	16.7914	16.6985
DNA-Genome-Picea-abies-GCA_900067695.1-2016-11-09.one_line	11960690255	100	4	GAT_122	591600	14.5245	16.2181	14.8492	17.8139	15.833	15.821	15.7708
DNA-Genome-Picea-abies-GCA_900067695.1-2016-11-09.one_line	11960690255	100	4	AGTC_1234	495800	22.0819	21.4857	22.5547	24.8899	21.9189	21.8459	21.7983
DNA-Genome-Picea-abies-GCA_900067695.1-2016-11-09.one_line	11960690255	100	4	TCAG_1234	492700	21.973	21.2543	22.4672	24.7759	21.7161	21.6322	21.5872
DNA-Genome-Picea-abies-GCA_900067695.1-2016-11-09.one_line	11960690255	100	4	ACTG_1234	367900	21.3167	20.7934	21.8086	24.0394	21.343	21.2014	21.1644
DNA-Genome-Picea-abies-GCA_900067695.1-2016-11-09.one_line	11960690255	100	4	TGAC_1234	310300	21.5301	20.9275	22.0232	24.2108	21.5917	21.3916	21.369
DNA-Genome-Picea-abies-GCA_900067695.1-2016-11-09.one_line	11960690255	100	4	TACG_1333	285700	21.7315	21.8768	22.252	24.4704	21.9097	21.7861	21.7907
DNA-Genome-Picea-abies-GCA_900067695.1-2016-11-09.one_line	11960690255	100	4	ACTG_1333	275800	21.7893	21.9953	22.3437	24.5649	22.091	21.9801	21.984
DNA-Genome-Picea-abies-GCA_900067695.1-2016-11-09.one_line	11960690255	100	4	TCGA_1234	139800	22.7239	22.4406	23.3405	25.7625	23.5823	23.3276	23.3677
DNA-Genome-Picea-abies-GCA_900067695.1-2016-11-09.one_line	11960690255	100	4	AGCT_1234	109800	22.6876	22.3907	23.3352	25.7104	23.6976	23.3852	23.4681
DNA-Genome-Picea-abies-GCA_900067695.1-2016-11-09.one_line	11960690255	100	4	CTAG_1234	102100	21.9128	21.8903	22.6072	25.1557	23.3389	23.0196	23.1107
DNA-Genome-Picea-abies-GCA_900067695.1-2016-11-09.one_line	11960690255	100	4	ACGT_1234	96700	22.6184	22.2296	23.2141	25.5129	23.3847	23.1148	23.181
DNA-Genome-Picea-abies-GCA_900067695.1-2016-11-09.one_line	11960690255	100	4	GATC_1234	91400	22.2079	22.3928	22.9409	25.6849	23.9289	23.5383	23.6368
DNA-Genome-Picea-abies-GCA_900067695.1-2016-11-09.one_line	11960690255	100	4	TGCA_1234	89300	22.6618	21.9171	23.252	25.439	23.187	22.8757	22.9653
DNA-Genome-Picea-abies-GCA_900067695.1-2016-11-09.one_line	11960690255	100	4	AT_11	67400	5.6484	6.1395	5.9881	7.2196	7.4659	7.4985	7.3531
DNA-Genome-Picea-abies-GCA_900067695.1-2016-11-09.one_line	11960690255	100	4	CATG_1234	51700	22.9981	22.8569	23.706	26.2244	24.5899	24.1315	24.2631
DNA-Genome-Picea-abies-GCA_900067695.1-2016-11-09.one_line	11960690255	100	4	TANC_1234	50500	13.4515	14.2198	14.1386	16.4238	17.295	16.3366	15.9287
DNA-Genome-Picea-abies-GCA_900067695.1-2016-11-09.one_line	11960690255	100	4	ATNC_1234	48700	13.0945	13.9199	13.7864	15.9733	16.9671	16.1622	15.7043
DNA-Genome-Picea-abies-GCA_900067695.1-2016-11-09.one_line	11960690255	100	4	GTAC_1234	48200	22.6867	22.4689	23.3817	25.8506	24.3154	23.8029	23.8589
DNA-Genome-Picea-abies-GCA_900067695.1-2016-11-09.one_line	11960690255	100	4	CTGA_1234	18700	23.5829	23.0642	24.5455	26.8021	26.5134	25.6524	25.861
DNA-Genome-Picea-abies-GCA_900067695.1-2016-11-09.one_line	11960690255	100	4	GACT_1234	15000	23.7333	23.58	24.72	27.06	27.1467	26.0467	26.4
DNA-Genome-Picea-abies-GCA_900067695.1-2016-11-09.one_line	11960690255	100	4	TAGN_1233	11400	11.0702	11.9035	11.6316	13.4123	16.3421	14.3158	14.0702
DNA-Genome-Picea-abies-GCA_900067695.1-2016-11-09.one_line	11960690255	100	4	CAGT_1234	10200	23.9216	23.8529	25.0196	27.1275	27.6569	26.3725	26.902
DNA-Genome-Picea-abies-GCA_900067695.1-2016-11-09.one_line	11960690255	100	4	GTCA_1234	9900	24.0101	23.7071	25.1717	27.3333	27.7172	26.3939	26.8687
DNA-Genome-Picea-abies-GCA_900067695.1-2016-11-09.one_line	11960690255	100	4	TACN_1233	9300	9.6989	10.6667	10.3871	12.0753	15.4409	13.1505	12.9032
DNA-Genome-Picea-abies-GCA_900067695.1-2016-11-09.one_line	11960690255	100	4	ATGN_1233	8700	11.2069	11.6207	11.954	13.5057	16.6322	14.1494	14.023
DNA-Genome-Picea-abies-GCA_900067695.1-2016-11-09.one_line	11960690255	100	4	ATCN_1233	8600	12.1163	12.6628	12.8372	14.7674	17.6395	15.1744	15.0698
DNA-Genome-Picea-abies-GCA_900067695.1-2016-11-09.one_line	11960690255	100	4	CATG_1333	6200	23.7581	24.0968	24.8065	26.8871	29.0484	27.3548	27.8065
DNA-Genome-Picea-abies-GCA_900067695.1-2016-11-09.one_line	11960690255	100	4	CT_11	6100	7.7869	9.0328	8.5902	9.377	12.4426	10.4262	10.7541
DNA-Genome-Picea-abies-GCA_900067695.1-2016-11-09.one_line	11960690255	100	4	AGNC_1234	5500	15.6364	15.5273	16.6909	18.7091	22.3818	19.2364	19.4909
DNA-Genome-Picea-abies-GCA_900067695.1-2016-11-09.one_line	11960690255	100	4	GACT_1333	4900	23.7551	24.1837	24.898	27.3061	30.3061	27.7347	28.4082
DNA-Genome-Picea-abies-GCA_900067695.1-2016-11-09.one_line	11960690255	100	4	CTAN_1233	4800	14.3958	15.5833	15.25	17.7708	21.4583	17.9375	18.3333
DNA-Genome-Picea-abies-GCA_900067695.1-2016-11-09.one_line	11960690255	100	4	TCG_122	4700	12.8723	12.8723	13.8723	15	17.7872	14.9787	15.8298
DNA-Genome-Picea-abies-GCA_900067695.1-2016-11-09.one_line	11960690255	100	4	ACG_122	4300	12.7442	13	14.0465	15.1395	18.7674	15.6512	16.2791
DNA-Genome-Picea-abies-GCA_900067695.1-2016-11-09.one_line	11960690255	100	4	GATN_1233	4200	14.4524	15.3333	15.381	17.7143	22	18.1905	18.7619
DNA-Genome-Picea-abies-GCA_900067695.1-2016-11-09.one_line	11960690255	100	4	AG_11	3800	7.8947	9.5263	9.0526	9.5	14.6053	11.1053	11.7895
DNA-Genome-Picea-abies-GCA_900067695.1-2016-11-09.one_line	11960690255	100	4	GCTA_1234	3700	25.2162	25.3243	26.5405	29.1081	32.7027	29.973	30.8108
DNA-Genome-Picea-abies-GCA_900067695.1-2016-11-09.one_line	11960690255	100	4	GANC_1234	3600	15.75	17.1389	17	18.8611	24.2778	20	20.6667
DNA-Genome-Picea-abies-GCA_900067695.1-2016-11-09.one_line	11960690255	100	4	TCNA_1234	3300	13.3333	13.7273	14.1818	15.3636	23.1515	17.8182	18.1818
DNA-Genome-Picea-abies-GCA_900067695.1-2016-11-09.one_line	11960690255	100	4	CGTA_1234	3000	26.0667	25.9	27.6	29.7667	34.8	31.1667	32.1333
DNA-Genome-Picea-abies-GCA_900067695.1-2016-11-09.one_line	11960690255	100	4	CGAT_1234	3000	26.1	26.1333	27.6667	30.1	34.9667	31.5	32.6667
DNA-Genome-Picea-abies-GCA_900067695.1-2016-11-09.one_line	11960690255	100	4	ACNT_1234	2900	12.931	12.931	13.7241	14.6207	22.7586	16.8276	17.6552
DNA-Genome-Picea-abies-GCA_900067695.1-2016-11-09.one_line	11960690255	100	4	AGTN_1233	2800	15.25	14.4286	16	17.4286	23.3214	17.8571	18.5714
DNA-Genome-Picea-abies-GCA_900067695.1-2016-11-09.one_line	11960690255	100	4	TGNA_1234	2700	10.963	11.3333	11.8519	12.2222	21.8889	15.7037	16.1481
DNA-Genome-Picea-abies-GCA_900067695.1-2016-11-09.one_line	11960690255	100	4	TCAN_1233	2700	15.8148	15.6296	16.8148	18.7037	24.1852	18.8889	19.7037
DNA-Genome-Picea-abies-GCA_900067695.1-2016-11-09.one_line	11960690255	100	4	GCAT_1234	2500	26.24	25.16	27.84	30.2	35.52	31.28	32.48
DNA-Genome-Picea-abies-GCA_900067695.1-2016-11-09.one_line	11960690255	100	4	CTNA_1234	2400	17.3333	17.4167	18.8333	20.6667	29.1667	22	23
DNA-Genome-Picea-abies-GCA_900067695.1-2016-11-09.one_line	11960690255	100	4	CTG_122	2400	12.375	13.7083	13.75	14.8333	21.0417	16.25	17.3333
DNA-Genome-Picea-abies-GCA_900067695.1-2016-11-09.one_line	11960690255	100	4	AC_11	2200	3.0909	2.7727	4.8182	3.7273	10.7273	4.6364	6.1818
DNA-Genome-Picea-abies-GCA_900067695.1-2016-11-09.one_line	11960690255	100	4	ACTN_1233	2000	15.1	14.8	16.1	17.35	26.6	19.55	20.8
DNA-Genome-Picea-abies-GCA_900067695.1-2016-11-09.one_line	11960690255	100	4	ATN_122	1500	10.7333	10.9333	12	12.6	25.1333	13.6	15.4667
DNA-Genome-Picea-abies-GCA_900067695.1-2016-11-09.one_line	11960690255	100	4	GAC_122	1300	14.8462	15	17.3846	18.1538	28.5385	18.6923	20.9231
DNA-Genome-Picea-abies-GCA_900067695.1-2016-11-09.one_line	11960690255	100	4	TG_11	800	6.625	3.625	10	7	23.625	7.5	11.5
DNA-Genome-Picea-abies-GCA_900067695.1-2016-11-09.one_line	11960690255	100	4	TAN_122	700	16	14.7143	18.5714	18.5714	37.8571	19	23.4286
DNA-Genome-Picea-abies-GCA_900067695.1-2016-11-09.one_line	11960690255	100	4	CATN_1233	700	21.1429	16.8571	22.5714	22	40.5714	23.1429	27.4286
DNA-Genome-Picea-abies-GCA_900067695.1-2016-11-09.one_line	11960690255	100	4	GTAN_1233	600	16.8333	13	17.6667	15.8333	42.5	18.5	22.6667
DNA-Genome-Picea-abies-GCA_900067695.1-2016-11-09.one_line	11960690255	100	4	GAN_122	500	15.4	12.2	19.2	16.2	45.6	19	24.8
DNA-Genome-Picea-abies-GCA_900067695.1-2016-11-09.one_line	11960690255	100	4	CANT_1234	500	22.4	17.8	25.6	23	53.6	27.8	33.6
DNA-Genome-Picea-abies-GCA_900067695.1-2016-11-09.one_line	11960690255	100	4	TGAN_1233	500	24	20	26	25.6	51.4	26.2	32.8
DNA-Genome-Picea-abies-GCA_900067695.1-2016-11-09.one_line	11960690255	100	4	GTNA_1234	400	20.5	15.25	24.5	21	58.5	25.25	33
DNA-Genome-Picea-abies-GCA_900067695.1-2016-11-09.one_line	11960690255	100	4	CAG_122	300	17.6667	9.3333	24.6667	16.3333	62.3333	18.6667	29.3333
DNA-Genome-Picea-abies-GCA_900067695.1-2016-11-09.one_line	11960690255	100	4	TCGN_1233	300	29	21	34.6667	31	72.3333	34	45.3333
DNA-Genome-Picea-abies-GCA_900067695.1-2016-11-09.one_line	11960690255	100	4	ATGN_2222	300	35.3333	25.6667	38	36	79.6667	40.3333	52
DNA-Genome-Picea-abies-GCA_900067695.1-2016-11-09.one_line	11960690255	100	4	GACN_1233	200	33	21	41	34	95	35	52
DNA-Genome-Picea-abies-GCA_900067695.1-2016-11-09.one_line	11960690255	100	4	CTGN_1233	200	30.5	17	39	33	90.5	34.5	50
DNA-Genome-Picea-abies-GCA_900067695.1-2016-11-09.one_line	11960690255	100	4	GCT_122	200	28.5	15	38	27	83	28	44
DNA-Genome-Picea-abies-GCA_900067695.1-2016-11-09.one_line	11960690255	100	4	ACN_122	200	27	17	38	30	85.5	28.5	44
DNA-Genome-Picea-abies-GCA_900067695.1-2016-11-09.one_line	11960690255	100	4	CTN_122	200	31.5	17	41	34	91	35	52
DNA-Genome-Picea-abies-GCA_900067695.1-2016-11-09.one_line	11960690255	100	4	TGN_122	100	46	19	66	48	155	46	76
DNA-Genome-Picea-abies-GCA_900067695.1-2016-11-09.one_line	11960690255	100	4	ACGN_1233	100	59	31	80	67	168	64	92
DNA-Genome-Picea-abies-GCA_900067695.1-2016-11-09.one_line	11960690255	100	4	TCN_122	100	43	18	66	45	155	46	76
DNA-Genome-Picea-abies-GCA_900067695.1-2016-11-09.one_line	11960690255	100	4	AGCN_1233	100	50	30	70	53	157	53	84
DNA-Genome-Picea-abies-GCA_900067695.1-2016-11-09.one_line	11960690255	100	4	ACTN_2222	100	66	38	84	70	180	76	104
DNA-Genome-Picea-abies-GCA_900067695.1-2016-11-09.one_line	11960690255	125	4	ACTG_2222	6580234755	23.7907	20.0201	23.6681	26.966	18.1517	20.8519	20.882
DNA-Genome-Picea-abies-GCA_900067695.1-2016-11-09.one_line	11960690255	125	4	TACG_1233	2163534000	22.6916	20.6912	22.8509	26.2901	19.5693	21.7218	21.725
DNA-Genome-Picea-abies-GCA_900067695.1-2016-11-09.one_line	11960690255	125	4	ATCG_1233	2059586250	22.6841	20.6891	22.8514	26.2845	19.5759	21.7283	21.7213
DNA-Genome-Picea-abies-GCA_900067695.1-2016-11-09.one_line	11960690255	125	4	TCAG_1233	341061250	21.3309	18.6163	21.0796	25.8312	17.1676	19.2177	19.1755
DNA-Genome-Picea-abies-GCA_900067695.1-2016-11-09.one_line	11960690255	125	4	AGCT_1233	303753375	21.4044	18.7406	21.2358	25.8229	17.3188	19.3301	19.2926
DNA-Genome-Picea-abies-GCA_900067695.1-2016-11-09.one_line	11960690255	125	4	ACTG_1233	195282750	21.0346	18.5139	20.8428	25.632	17.2553	19.3441	19.2538
DNA-Genome-Picea-abies-GCA_900067695.1-2016-11-09.one_line	11960690255	125	4	TGAC_1233	162632500	21.0132	18.463	20.7671	25.5129	17.2728	19.2791	19.1885
DNA-Genome-Picea-abies-GCA_900067695.1-2016-11-09.one_line	11960690255	125	4	CTAG_1233	44235875	19.2025	17.3706	18.9874	24.1755	16.8135	17.9733	17.8084
DNA-Genome-Picea-abies-GCA_900067695.1-2016-11-09.one_line	11960690255	125	4	GACT_1233	35579250	19.8499	17.9953	19.7463	24.7099	17.565	18.4552	18.3386
DNA-Genome-Picea-abies-GCA_900067695.1-2016-11-09.one_line	11960690255	125	4	CATG_1233	19887125	18.2782	16.5031	17.8898	23.6822	16.3584	16.9398	16.6533
DNA-Genome-Picea-abies-GCA_900067695.1-2016-11-09.one_line	11960690255	125	4	GTAC_1233	14943125	18.5099	17.1678	18.6279	23.9324	17.0209	17.3997	17.1574
DNA-Genome-Picea-abies-GCA_900067695.1-2016-11-09.one_line	11960690255	125	4	ATGC_2223	10410500	22.593	21.7045	22.7953	26.5379	21.1585	21.2203	21.1503
DNA-Genome-Picea-abies-GCA_900067695.1-2016-11-09.one_line	11960690255	125	4	ACTG_2223	10149000	22.445	21.5264	22.6667	26.4926	21.0185	21.0839	20.9947
DNA-Genome-Picea-abies-GCA_900067695.1-2016-11-09.one_line	11960690255	125	4	TAGC_1234	2170500	22.0201	21.3239	22.404	25.4103	21.5427	21.4931	21.4485
DNA-Genome-Picea-abies-GCA_900067695.1-2016-11-09.one_line	11960690255	125	4	ATGC_1234	2162250	21.9376	21.1712	22.3101	25.3029	21.335	21.3062	21.2466
DNA-Genome-Picea-abies-GCA_900067695.1-2016-11-09.one_line	11960690255	125	4	ATCG_1234	2087875	21.9235	21.1753	22.3251	25.3247	21.3997	21.3578	21.3315
DNA-Genome-Picea-abies-GCA_900067695.1-2016-11-09.one_line	11960690255	125	4	TACG_1234	2006500	21.7999	21.012	22.1847	25.1671	21.1679	21.1469	21.0809
DNA-Genome-Picea-abies-GCA_900067695.1-2016-11-09.one_line	11960690255	125	4	CGAT_1233	1541125	17.1672	16.1272	17.2234	19.836	16.3246	16.5172	16.3174
DNA-Genome-Picea-abies-GCA_900067695.1-2016-11-09.one_line	11960690255	125	4	GCAT_1233	1331750	17.4303	16.4192	17.5021	20.0309	16.612	16.8095	16.6148
DNA-Genome-Picea-abies-GCA_900067695.1-2016-11-09.one_line	11960690255	125	4	CTGA_2223	1268125	23.3151	22.7462	23.5649	25.9593	22.3498	22.3266	22.312
DNA-Genome-Picea-abies-GCA_900067695.1-2016-11-09.one_line	11960690255	125	4	ACGT_2223	1150375	23.3288	22.7118	23.577	25.9262	22.378	22.373	22.3478
DNA-Genome-Picea-abies-GCA_900067695.1-2016-11-09.one_line	11960690255	125	4	TCAG_1234	578125	21.8358	21.0659	22.2751	24.5317	21.3833	21.2688	21.2259
DNA-Genome-Picea-abies-GCA_900067695.1-2016-11-09.one_line	11960690255	125	4	AGTC_1234	573000	22.0449	21.3122	22.4705	24.7468	21.6457	21.5077	21.5065
DNA-Genome-Picea-abies-GCA_900067695.1-2016-11-09.one_line	11960690255	125	4	ACT_122	516750	15.564	15.9698	15.9601	18.651	16.485	16.5055	16.4459
DNA-Genome-Picea-abies-GCA_900067695.1-2016-11-09.one_line	11960690255	125	4	CAT_122	479000	14.3651	16.3234	14.7436	17.7148	15.7685	15.7125	15.6668
DNA-Genome-Picea-abies-GCA_900067695.1-2016-11-09.one_line	11960690255	125	4	TAG_122	473250	15.4848	15.8969	15.9155	18.5627	16.4425	16.4609	16.3592
DNA-Genome-Picea-abies-GCA_900067695.1-2016-11-09.one_line	11960690255	125	4	ACTG_1234	408500	20.9381	20.3202	21.3905	23.5625	20.8196	20.6933	20.6022
DNA-Genome-Picea-abies-GCA_900067695.1-2016-11-09.one_line	11960690255	125	4	TGAC_1234	353000	21.1609	20.504	21.5904	23.7215	20.9748	20.8408	20.8057
DNA-Genome-Picea-abies-GCA_900067695.1-2016-11-09.one_line	11960690255	125	4	GAT_122	322000	14.4879	16.3202	14.8708	17.8531	16	15.9329	15.9043
DNA-Genome-Picea-abies-GCA_900067695.1-2016-11-09.one_line	11960690255	125	4	ATG_122	313375	16.0878	16.3274	16.4946	19.141	17.0869	17.0448	16.9726
DNA-Genome-Picea-abies-GCA_900067695.1-2016-11-09.one_line	11960690255	125	4	TAC_122	305250	16.1641	16.2794	16.5576	19.2023	17.0958	17.0785	16.9723
DNA-Genome-Picea-abies-GCA_900067695.1-2016-11-09.one_line	11960690255	125	4	TACG_1333	218000	22.0803	22.0775	22.5229	24.7725	22.1477	22.1005	22.0771
DNA-Genome-Picea-abies-GCA_900067695.1-2016-11-09.one_line	11960690255	125	4	ACTG_1333	215375	22.0898	22.0337	22.5588	24.8441	22.2389	22.12	22.1456
DNA-Genome-Picea-abies-GCA_900067695.1-2016-11-09.one_line	11960690255	125	4	TCGA_1234	154625	22.6677	22.2209	23.211	25.5631	23.0726	22.7602	22.8734
DNA-Genome-Picea-abies-GCA_900067695.1-2016-11-09.one_line	11960690255	125	4	AGCT_1234	118375	22.4769	22.1153	23.0623	25.3964	23.1197	22.9288	22.8866
DNA-Genome-Picea-abies-GCA_900067695.1-2016-11-09.one_line	11960690255	125	4	CTAG_1234	108125	21.7702	21.9699	22.4888	25.0331	23.4183	23.1214	23.1362
DNA-Genome-Picea-abies-GCA_900067695.1-2016-11-09.one_line	11960690255	125	4	ACGT_1234	95000	22.7442	22.1926	23.3432	25.6253	23.3105	22.9716	23.0568
DNA-Genome-Picea-abies-GCA_900067695.1-2016-11-09.one_line	11960690255	125	4	GATC_1234	93000	22.0387	22.2312	22.7677	25.3355	23.6634	23.3333	23.4065
DNA-Genome-Picea-abies-GCA_900067695.1-2016-11-09.one_line	11960690255	125	4	TGCA_1234	91125	22.6502	21.8151	23.1989	25.3454	23.0431	22.7204	22.7863
DNA-Genome-Picea-abies-GCA_900067695.1-2016-11-09.one_line	11960690255	125	4	GTAC_1234	44000	22.7477	22.7705	23.4273	25.9682	24.5636	24.15	24.2091
DNA-Genome-Picea-abies-GCA_900067695.1-2016-11-09.one_line	11960690255	125	4	CATG_1234	43500	22.9034	22.6897	23.6506	25.9793	24.5678	23.9954	24.1287
DNA-Genome-Picea-abies-GCA_900067695.1-2016-11-09.one_line	11960690255	125	4	TANC_1234	32875	12.2555	13.2471	12.9825	15.1148	16.438	15.7049	15.1848
DNA-Genome-Picea-abies-GCA_900067695.1-2016-11-09.one_line	11960690255	125	4	ATNC_1234	30125	12.01	13.1187	12.7469	14.7054	16.2656	15.7278	15.1768
DNA-Genome-Picea-abies-GCA_900067695.1-2016-11-09.one_line	11960690255	125	4	CTGA_1234	18500	23.3838	23.3514	24.4108	26.6324	26.5676	25.6432	25.9027
DNA-Genome-Picea-abies-GCA_900067695.1-2016-11-09.one_line	11960690255	125	4	AT_11	17125	6.3766	6.6861	6.8204	8.1285	8.5606	8.1285	8.1518
DNA-Genome-Picea-abies-GCA_900067695.1-2016-11-09.one_line	11960690255	125	4	GACT_1234	11500	23.8783	23.8087	25.0261	27.2	27.8696	26.6087	26.9913
DNA-Genome-Picea-abies-GCA_900067695.1-2016-11-09.one_line	11960690255	125	4	CAGT_1234	8125	24.4431	24.32	25.6246	27.8031	29.12	27.4092	27.7662
DNA-Genome-Picea-abies-GCA_900067695.1-2016-11-09.one_line	11960690255	125	4	GTCA_1234	6375	24.8784	24.6275	26.1647	28.7529	30.3059	28.5176	28.8627
DNA-Genome-Picea-abies-GCA_900067695.1-2016-11-09.one_line	11960690255	125	4	TAGN_1233	6125	12.7837	13.7959	13.5837	15.6735	19.5102	16.5224	16.5224
DNA-Genome-Picea-abies-GCA_900067695.1-2016-11-09.one_line	11960690255	125	4	ATCN_1233	3875	13.9097	14.4774	14.7097	16.4387	21.9871	17.471	18.0645
DNA-Genome-Picea-abies-GCA_900067695.1-2016-11-09.one_line	11960690255	125	4	GATN_1233	3125	16.48	18.208	17.792	19.968	25.824	21.376	22.4
DNA-Genome-Picea-abies-GCA_900067695.1-2016-11-09.one_line	11960690255	125	4	ATGN_1233	3125	14.912	14.368	15.936	17.728	22.304	17.536	18.304
DNA-Genome-Picea-abies-GCA_900067695.1-2016-11-09.one_line	11960690255	125	4	CTAN_1233	2875	15.9652	16.8348	17.113	19.5826	24.8	20.5217	21.287
DNA-Genome-Picea-abies-GCA_900067695.1-2016-11-09.one_line	11960690255	125	4	CGTA_1234	2875	26.1565	25.5652	27.687	29.8435	35.3391	31.687	32.8348
DNA-Genome-Picea-abies-GCA_900067695.1-2016-11-09.one_line	11960690255	125	4	GANC_1234	2625	16.2286	16.8762	17.6762	19.581	26.4762	21.0667	21.9429
DNA-Genome-Picea-abies-GCA_900067695.1-2016-11-09.one_line	11960690255	125	4	GCAT_1234	2500	26.8	25.48	28.32	30.16	36.72	31.76	33.28
DNA-Genome-Picea-abies-GCA_900067695.1-2016-11-09.one_line	11960690255	125	4	GACT_1333	2375	25.5158	24.9263	26.8632	29.2211	34.7368	30.4421	31.6632
DNA-Genome-Picea-abies-GCA_900067695.1-2016-11-09.one_line	11960690255	125	4	TACN_1233	2125	16.0471	15.8588	17.1294	19.1529	26.9176	20.4235	21.8353
DNA-Genome-Picea-abies-GCA_900067695.1-2016-11-09.one_line	11960690255	125	4	CTNA_1234	2125	15.8588	16.2353	17.2235	18.7765	27.2	20.6588	21.6471
DNA-Genome-Picea-abies-GCA_900067695.1-2016-11-09.one_line	11960690255	125	4	CATG_1333	1875	27.2	27.0933	28.8	31.5733	39.1467	33.7067	35.4133
DNA-Genome-Picea-abies-GCA_900067695.1-2016-11-09.one_line	11960690255	125	4	GCTA_1234	1750	28.8	27.7714	31.0857	33.0857	41.8286	36.0571	37.9429
DNA-Genome-Picea-abies-GCA_900067695.1-2016-11-09.one_line	11960690255	125	4	AGNC_1234	1625	18.7692	17.6615	20.1846	21.4154	32.7385	23.7538	25.3538
DNA-Genome-Picea-abies-GCA_900067695.1-2016-11-09.one_line	11960690255	125	4	ACG_122	1500	11.8	11.5333	13.8667	13.9333	22.8667	15.1333	17.0667
DNA-Genome-Picea-abies-GCA_900067695.1-2016-11-09.one_line	11960690255	125	4	CT_11	1375	11.7091	12	14.1091	14.3273	22.6182	14.9091	17.4545
DNA-Genome-Picea-abies-GCA_900067695.1-2016-11-09.one_line	11960690255	125	4	TCG_122	1250	13.84	13.68	15.84	16.16	28.32	17.04	19.52
DNA-Genome-Picea-abies-GCA_900067695.1-2016-11-09.one_line	11960690255	125	4	CGAT_1234	1125	29.6889	27.8222	31.6444	33.1556	47.1111	37.8667	40.8889
DNA-Genome-Picea-abies-GCA_900067695.1-2016-11-09.one_line	11960690255	125	4	TCAN_1233	1125	19.9111	18.3111	21.6889	22.9333	36.7111	24.2667	27.0222
DNA-Genome-Picea-abies-GCA_900067695.1-2016-11-09.one_line	11960690255	125	4	TCNA_1234	1000	17.8	16.1	18.8	18.3	35.4	22.3	25.2
DNA-Genome-Picea-abies-GCA_900067695.1-2016-11-09.one_line	11960690255	125	4	AC_11	1000	5.1	3.3	8.4	6.2	18.9	6.7	10
DNA-Genome-Picea-abies-GCA_900067695.1-2016-11-09.one_line	11960690255	125	4	AG_11	875	12.1143	12.1143	15.5429	14.0571	28.2286	16.1143	19.6571
DNA-Genome-Picea-abies-GCA_900067695.1-2016-11-09.one_line	11960690255	125	4	ACNT_1234	875	16.1143	14.4	17.6	16.9143	35.0857	21.8286	23.7714
DNA-Genome-Picea-abies-GCA_900067695.1-2016-11-09.one_line	11960690255	125	4	AGTN_1233	875	19.7714	16.5714	20.8	20.9143	36.4571	22.5143	26.0571
DNA-Genome-Picea-abies-GCA_900067695.1-2016-11-09.one_line	11960690255	125	4	TGAN_1233	750	22.5333	17.2	23.4667	23.3333	42.9333	24.4	28.8
DNA-Genome-Picea-abies-GCA_900067695.1-2016-11-09.one_line	11960690255	125	4	ACTN_1233	500	25.2	19	27.2	26	51.4	28.4	35.2
DNA-Genome-Picea-abies-GCA_900067695.1-2016-11-09.one_line	11960690255	125	4	CATN_1233	500	25.2	20.4	27.6	26.8	52.2	27	33.6
DNA-Genome-Picea-abies-GCA_900067695.1-2016-11-09.one_line	11960690255	125	4	GAC_122	375	23.4667	16.2667	29.3333	24.5333	53.0667	25.3333	34.1333
DNA-Genome-Picea-abies-GCA_900067695.1-2016-11-09.one_line	11960690255	125	4	TG_11	375	11.4667	5.0667	17.6	12.2667	44	12.8	21.3333
DNA-Genome-Picea-abies-GCA_900067695.1-2016-11-09.one_line	11960690255	125	4	TGNA_1234	375	26.1333	20.5333	29.8667	26.6667	66.4	31.2	39.4667
DNA-Genome-Picea-abies-GCA_900067695.1-2016-11-09.one_line	11960690255	125	4	CTG_122	250	31.6	21.6	40	33.6	76.4	34.4	48
DNA-Genome-Picea-abies-GCA_900067695.1-2016-11-09.one_line	11960690255	125	4	GACN_1233	125	43.2	24	59.2	43.2	131.2	44.8	67.2
DNA-Genome-Picea-abies-GCA_900067695.1-2016-11-09.one_line	11960690255	125	4	GTAN_1233	125	47.2	24.8	60.8	46.4	133.6	46.4	70.4
DNA-Genome-Picea-abies-GCA_900067695.1-2016-11-09.one_line	11960690255	125	4	GTNA_1234	125	48.8	29.6	64	48.8	142.4	53.6	76.8
DNA-Genome-Picea-abies-GCA_900067695.1-2016-11-09.one_line	11960690255	125	4	CTGN_1233	125	38.4	19.2	57.6	40.8	124	41.6	64
DNA-Genome-Picea-abies-GCA_900067695.1-2016-11-09.one_line	11960690255	125	4	ATN_122	125	45.6	28	60.8	51.2	135.2	48	70.4
DNA-Genome-Picea-abies-GCA_900067695.1-2016-11-09.one_line	11960690255	125	4	CANT_1234	125	49.6	25.6	64	49.6	140.8	53.6	76.8
DNA-Genome-Picea-abies-GCA_900067695.1-2016-11-09.one_line	11960690255	125	4	TCGN_1233	125	45.6	26.4	59.2	45.6	140	47.2	70.4
DNA-Genome-Picea-abies-GCA_900067695.1-2016-11-09.one_line	11960690255	150	4	ACTG_2222	6755883005	23.7791	19.9008	23.6569	26.9634	17.9918	20.7345	20.7652
DNA-Genome-Picea-abies-GCA_900067695.1-2016-11-09.one_line	11960690255	150	4	TACG_1233	2139527250	22.7139	20.5792	22.8571	26.3065	19.3856	21.5944	21.5949
DNA-Genome-Picea-abies-GCA_900067695.1-2016-11-09.one_line	11960690255	150	4	ATCG_1233	2061404700	22.7135	20.591	22.8684	26.305	19.4002	21.6113	21.6117
DNA-Genome-Picea-abies-GCA_900067695.1-2016-11-09.one_line	11960690255	150	4	TCAG_1233	302680800	21.1943	18.2963	20.9527	25.7821	16.7958	18.8553	18.7977
DNA-Genome-Picea-abies-GCA_900067695.1-2016-11-09.one_line	11960690255	150	4	AGCT_1233	270311550	21.2905	18.4215	21.0936	25.7808	16.9426	18.9593	18.9056
DNA-Genome-Picea-abies-GCA_900067695.1-2016-11-09.one_line	11960690255	150	4	ACTG_1233	160551750	20.8471	18.0966	20.5901	25.5406	16.8234	18.9134	18.7933
DNA-Genome-Picea-abies-GCA_900067695.1-2016-11-09.one_line	11960690255	150	4	TGAC_1233	135157650	20.8211	18.0657	20.5479	25.4355	16.8606	18.8639	18.7388
DNA-Genome-Picea-abies-GCA_900067695.1-2016-11-09.one_line	11960690255	150	4	CTAG_1233	37126950	18.973	17.132	18.8261	23.9479	16.685	17.7121	17.5261
DNA-Genome-Picea-abies-GCA_900067695.1-2016-11-09.one_line	11960690255	150	4	GACT_1233	28270050	19.6628	17.7981	19.4326	24.5412	17.4732	18.1989	18.0645
DNA-Genome-Picea-abies-GCA_900067695.1-2016-11-09.one_line	11960690255	150	4	CATG_1233	14627250	17.4952	16.039	17.6069	23.1878	15.92	16.3748	16.0439
DNA-Genome-Picea-abies-GCA_900067695.1-2016-11-09.one_line	11960690255	150	4	ATGC_2223	12655500	22.5021	21.4622	22.6864	26.539	20.843	20.9579	20.8719
DNA-Genome-Picea-abies-GCA_900067695.1-2016-11-09.one_line	11960690255	150	4	ACTG_2223	12371850	22.3809	21.2916	22.5787	26.5311	20.7086	20.8147	20.7281
DNA-Genome-Picea-abies-GCA_900067695.1-2016-11-09.one_line	11960690255	150	4	GTAC_1233	10822050	18.3311	16.7694	18.4408	23.5079	16.6164	16.9139	16.6365
DNA-Genome-Picea-abies-GCA_900067695.1-2016-11-09.one_line	11960690255	150	4	ATGC_1234	2670900	21.8884	21.0898	22.2389	25.1894	21.1264	21.1011	21.0316
DNA-Genome-Picea-abies-GCA_900067695.1-2016-11-09.one_line	11960690255	150	4	TAGC_1234	2655600	21.894	21.1076	22.2451	25.2377	21.2235	21.2008	21.1268
DNA-Genome-Picea-abies-GCA_900067695.1-2016-11-09.one_line	11960690255	150	4	ATCG_1234	2605950	21.8686	21.0716	22.2423	25.2638	21.1967	21.1688	21.1049
DNA-Genome-Picea-abies-GCA_900067695.1-2016-11-09.one_line	11960690255	150	4	TACG_1234	2568150	21.7515	20.8798	22.1004	25.1326	20.8966	20.8802	20.8081
DNA-Genome-Picea-abies-GCA_900067695.1-2016-11-09.one_line	11960690255	150	4	CTGA_2223	1328850	23.2997	22.6168	23.5253	25.9455	22.1697	22.1449	22.1229
DNA-Genome-Picea-abies-GCA_900067695.1-2016-11-09.one_line	11960690255	150	4	ACGT_2223	1191450	23.3173	22.6724	23.5641	25.8885	22.2714	22.2664	22.226
DNA-Genome-Picea-abies-GCA_900067695.1-2016-11-09.one_line	11960690255	150	4	CGAT_1233	1033500	17.1612	15.8297	17.212	19.4545	16.0403	16.2526	16.0414
DNA-Genome-Picea-abies-GCA_900067695.1-2016-11-09.one_line	11960690255	150	4	GCAT_1233	877650	17.6685	16.2373	17.7333	19.421	16.5106	16.7071	16.4968
DNA-Genome-Picea-abies-GCA_900067695.1-2016-11-09.one_line	11960690255	150	4	TCAG_1234	642300	21.908	21.0791	22.3335	24.567	21.3175	21.1941	21.1478
DNA-Genome-Picea-abies-GCA_900067695.1-2016-11-09.one_line	11960690255	150	4	AGTC_1234	635850	22.0568	21.3121	22.4622	24.7384	21.4654	21.3733	21.3252
DNA-Genome-Picea-abies-GCA_900067695.1-2016-11-09.one_line	11960690255	150	4	ACTG_1234	426750	20.8105	20.2791	21.2373	23.4064	20.6999	20.6214	20.5151
DNA-Genome-Picea-abies-GCA_900067695.1-2016-11-09.one_line	11960690255	150	4	TGAC_1234	361650	21.1323	20.5732	21.5579	23.6723	20.9786	20.8577	20.7825
DNA-Genome-Picea-abies-GCA_900067695.1-2016-11-09.one_line	11960690255	150	4	CAT_122	268650	14.5699	16.7344	15.0195	17.9966	16.2483	16.1485	16.14
DNA-Genome-Picea-abies-GCA_900067695.1-2016-11-09.one_line	11960690255	150	4	ACT_122	215550	15.5876	15.8404	16.0213	18.6657	16.6732	16.6736	16.6254
DNA-Genome-Picea-abies-GCA_900067695.1-2016-11-09.one_line	11960690255	150	4	TAG_122	204750	15.5551	15.623	15.9687	18.5143	16.4801	16.4078	16.3829
DNA-Genome-Picea-abies-GCA_900067695.1-2016-11-09.one_line	11960690255	150	4	GAT_122	170100	14.6961	16.6414	15.0958	18.1675	16.592	16.438	16.5079
DNA-Genome-Picea-abies-GCA_900067695.1-2016-11-09.one_line	11960690255	150	4	TACG_1333	166650	22.3108	22.3396	22.7867	25.0225	22.5125	22.2652	22.3366
DNA-Genome-Picea-abies-GCA_900067695.1-2016-11-09.one_line	11960690255	150	4	ACTG_1333	159900	22.2695	22.1132	22.738	24.8893	22.3996	22.2683	22.2714
DNA-Genome-Picea-abies-GCA_900067695.1-2016-11-09.one_line	11960690255	150	4	TCGA_1234	158850	22.741	22.5269	23.2635	25.5858	23.2137	22.9896	23.0179
DNA-Genome-Picea-abies-GCA_900067695.1-2016-11-09.one_line	11960690255	150	4	TAC_122	129900	16.2956	16.1293	16.7467	19.2479	17.3195	17.1909	17.1732
DNA-Genome-Picea-abies-GCA_900067695.1-2016-11-09.one_line	11960690255	150	4	AGCT_1234	126000	22.6095	22.4492	23.2111	25.4873	23.2738	22.9056	23.0667
DNA-Genome-Picea-abies-GCA_900067695.1-2016-11-09.one_line	11960690255	150	4	ATG_122	123750	16.2699	16.3564	16.716	19.4077	17.6178	17.4457	17.4158
DNA-Genome-Picea-abies-GCA_900067695.1-2016-11-09.one_line	11960690255	150	4	CTAG_1234	109950	21.4698	21.8417	22.1901	24.7704	23.1178	22.9059	22.9159
DNA-Genome-Picea-abies-GCA_900067695.1-2016-11-09.one_line	11960690255	150	4	GATC_1234	97200	21.7634	22.0206	22.4671	25.0607	23.4249	23.0257	23.0905
DNA-Genome-Picea-abies-GCA_900067695.1-2016-11-09.one_line	11960690255	150	4	ACGT_1234	94500	22.927	22.3545	23.4899	25.7037	23.4423	23.1619	23.1365
DNA-Genome-Picea-abies-GCA_900067695.1-2016-11-09.one_line	11960690255	150	4	TGCA_1234	91200	22.8794	22.3026	23.4145	25.6327	23.3289	23.1711	23.193
DNA-Genome-Picea-abies-GCA_900067695.1-2016-11-09.one_line	11960690255	150	4	CATG_1234	42000	23.069	22.8476	23.7714	26.1429	24.6643	24.2143	24.3524
DNA-Genome-Picea-abies-GCA_900067695.1-2016-11-09.one_line	11960690255	150	4	GTAC_1234	35400	23.0198	23.0932	23.8079	26.2627	25.3644	24.8136	24.9379
DNA-Genome-Picea-abies-GCA_900067695.1-2016-11-09.one_line	11960690255	150	4	CTGA_1234	17850	23.5686	23.2829	24.4482	26.7787	26.6106	25.4734	25.7703
DNA-Genome-Picea-abies-GCA_900067695.1-2016-11-09.one_line	11960690255	150	4	TANC_1234	16500	12.3758	13.4485	13.2121	15.4303	17.3455	16.3455	15.8788
DNA-Genome-Picea-abies-GCA_900067695.1-2016-11-09.one_line	11960690255	150	4	ATNC_1234	16500	12.5333	13.4909	13.3939	15.5212	17.1758	16.4	15.9273
DNA-Genome-Picea-abies-GCA_900067695.1-2016-11-09.one_line	11960690255	150	4	GACT_1234	13500	23.5704	23.2519	24.5926	26.8963	27.0444	25.9185	26.1333
DNA-Genome-Picea-abies-GCA_900067695.1-2016-11-09.one_line	11960690255	150	4	GTCA_1234	6600	24.8333	24.9394	26.0909	28.4394	30.4091	28.5152	29.0303
DNA-Genome-Picea-abies-GCA_900067695.1-2016-11-09.one_line	11960690255	150	4	CAGT_1234	5400	25.0741	24.4259	26.3333	28.6296	30.2963	28.3519	28.8148
DNA-Genome-Picea-abies-GCA_900067695.1-2016-11-09.one_line	11960690255	150	4	AT_11	3600	10.2778	10.1389	11.4444	12.8611	15.4722	12.5556	13.5556
DNA-Genome-Picea-abies-GCA_900067695.1-2016-11-09.one_line	11960690255	150	4	CTAN_1233	2400	15.7083	17.1667	17.1667	19.25	26.125	20.1667	21.3333
DNA-Genome-Picea-abies-GCA_900067695.1-2016-11-09.one_line	11960690255	150	4	GATN_1233	2250	17.3333	18.3556	18.7556	20.9333	28.1778	22.0444	23.4667
DNA-Genome-Picea-abies-GCA_900067695.1-2016-11-09.one_line	11960690255	150	4	TAGN_1233	2100	16.7619	16.2381	17.9048	19.5238	28.2381	21.3333	22.4762
DNA-Genome-Picea-abies-GCA_900067695.1-2016-11-09.one_line	11960690255	150	4	GCAT_1234	1950	26.8718	26.3077	28.5128	30.7179	37.6923	32.4103	34.0513
DNA-Genome-Picea-abies-GCA_900067695.1-2016-11-09.one_line	11960690255	150	4	CGTA_1234	1800	28.2222	28.0556	30.2222	31.8333	41.6111	36.0556	37.7778
DNA-Genome-Picea-abies-GCA_900067695.1-2016-11-09.one_line	11960690255	150	4	CATG_1333	1800	27.3333	27.1667	29.2222	31.1111	39.5	33.8889	35.5556
DNA-Genome-Picea-abies-GCA_900067695.1-2016-11-09.one_line	11960690255	150	4	ATGN_1233	1650	16.4848	14.5455	17.0909	18.9697	26.9697	18.5455	20.1212
DNA-Genome-Picea-abies-GCA_900067695.1-2016-11-09.one_line	11960690255	150	4	CGAT_1234	1650	27.8182	26.6667	29.8182	31.4545	40.0606	33.7576	35.8788
DNA-Genome-Picea-abies-GCA_900067695.1-2016-11-09.one_line	11960690255	150	4	GACT_1333	1500	27.7333	27.1333	29.3333	30.8667	41.4667	34.5333	36.8
DNA-Genome-Picea-abies-GCA_900067695.1-2016-11-09.one_line	11960690255	150	4	GANC_1234	1500	17.8	18.2667	20.1333	21.9333	33.1333	23.6	25.0667
DNA-Genome-Picea-abies-GCA_900067695.1-2016-11-09.one_line	11960690255	150	4	CTNA_1234	1200	20	19.5	22.3333	23.9167	36.5833	25.9167	28.3333
DNA-Genome-Picea-abies-GCA_900067695.1-2016-11-09.one_line	11960690255	150	4	GCTA_1234	1200	29.8333	28.8333	32.3333	33.1667	46.1667	37.5833	40.3333
DNA-Genome-Picea-abies-GCA_900067695.1-2016-11-09.one_line	11960690255	150	4	TACN_1233	900	17.6667	16.8889	19.7778	20.8889	37.6667	22.1111	25.3333
DNA-Genome-Picea-abies-GCA_900067695.1-2016-11-09.one_line	11960690255	150	4	TCAN_1233	600	26.3333	22.5	29.6667	29.1667	48.6667	30.6667	36
DNA-Genome-Picea-abies-GCA_900067695.1-2016-11-09.one_line	11960690255	150	4	ATCN_1233	600	25.8333	21.5	29.6667	30.1667	50	31.5	37.3333
DNA-Genome-Picea-abies-GCA_900067695.1-2016-11-09.one_line	11960690255	150	4	ACG_122	450	20.8889	18.4444	25.3333	23.3333	49.5556	24.6667	32
DNA-Genome-Picea-abies-GCA_900067695.1-2016-11-09.one_line	11960690255	150	4	AG_11	450	18.2222	16.8889	24	21.7778	46.4444	23.3333	31.1111
DNA-Genome-Picea-abies-GCA_900067695.1-2016-11-09.one_line	11960690255	150	4	CT_11	450	16.8889	14.6667	22.6667	20.2222	43.5556	20.8889	27.5556
DNA-Genome-Picea-abies-GCA_900067695.1-2016-11-09.one_line	11960690255	150	4	TCG_122	450	19.3333	18.2222	24.4444	22.6667	50.4444	24.4444	32
DNA-Genome-Picea-abies-GCA_900067695.1-2016-11-09.one_line	11960690255	150	4	AGNC_1234	450	27.1111	20.6667	31.5556	30.2222	62.4444	34.4444	40.8889
DNA-Genome-Picea-abies-GCA_900067695.1-2016-11-09.one_line	11960690255	150	4	TCNA_1234	300	31.3333	25.3333	38	35.3333	77.3333	37.6667	48
DNA-Genome-Picea-abies-GCA_900067695.1-2016-11-09.one_line	11960690255	150	4	AC_11	300	14.6667	7	23.3333	16.3333	56	17	28
DNA-Genome-Picea-abies-GCA_900067695.1-2016-11-09.one_line	11960690255	150	4	AGTN_1233	300	33	24.3333	38	34	73.6667	37	48
DNA-Genome-Picea-abies-GCA_900067695.1-2016-11-09.one_line	11960690255	150	4	GTAN_1233	150	45.3333	27.3333	56	46	126	50	72
DNA-Genome-Picea-abies-GCA_900067695.1-2016-11-09.one_line	11960690255	150	4	CTG_122	150	44.6667	26.6667	56	46.6667	116.667	47.3333	69.3333
DNA-Genome-Picea-abies-GCA_900067695.1-2016-11-09.one_line	11960690255	150	4	TG_11	150	27.3333	10	42.6667	29.3333	105.333	30	50.6667
DNA-Genome-Picea-abies-GCA_900067695.1-2016-11-09.one_line	11960690255	150	4	ACTN_1233	150	34	16	49.3333	37.3333	111.333	36	56
DNA-Genome-Picea-abies-GCA_900067695.1-2016-11-09.one_line	11960690255	150	4	CTGN_1233	150	33.3333	20	49.3333	35.3333	106	36.6667	58.6667
DNA-Genome-Picea-abies-GCA_900067695.1-2016-11-09.one_line	11960690255	250	4	ACTG_2222	7203779255	23.7567	19.6784	23.6386	26.9565	17.6915	20.5276	20.5595
DNA-Genome-Picea-abies-GCA_900067695.1-2016-11-09.one_line	11960690255	250	4	TACG_1233	2066892250	22.7888	20.4014	22.9113	26.3555	19.0668	21.3825	21.3739
DNA-Genome-Picea-abies-GCA_900067695.1-2016-11-09.one_line	11960690255	250	4	ATCG_1233	2009409000	22.7943	20.4165	22.929	26.3538	19.0814	21.4024	21.4012
DNA-Genome-Picea-abies-GCA_900067695.1-2016-11-09.one_line	11960690255	250	4	TCAG_1233	211010500	20.8685	17.4951	20.5216	25.6287	15.9517	17.9553	17.8708
DNA-Genome-Picea-abies-GCA_900067695.1-2016-11-09.one_line	11960690255	250	4	AGCT_1233	188234000	20.9684	17.6136	20.687	25.6435	16.0844	18.0308	17.9529
DNA-Genome-Picea-abies-GCA_900067695.1-2016-11-09.one_line	11960690255	250	4	ACTG_1233	87592750	20.3994	17.1785	20.1212	25.271	16.0669	17.9619	17.7967
DNA-Genome-Picea-abies-GCA_900067695.1-2016-11-09.one_line	11960690255	250	4	TGAC_1233	75275500	20.4634	17.2189	20.0533	25.2056	16.2109	17.9638	17.8024
DNA-Genome-Picea-abies-GCA_900067695.1-2016-11-09.one_line	11960690255	250	4	CTAG_1233	23270500	18.4773	16.9861	18.2189	23.3328	16.7527	17.4122	17.1985
DNA-Genome-Picea-abies-GCA_900067695.1-2016-11-09.one_line	11960690255	250	4	ACTG_2223	21763500	22.5888	20.7106	22.2819	26.6235	19.8782	20.2991	20.2135
DNA-Genome-Picea-abies-GCA_900067695.1-2016-11-09.one_line	11960690255	250	4	ATGC_2223	21559250	22.7372	20.9254	22.4471	26.6485	20.0588	20.469	20.3955
DNA-Genome-Picea-abies-GCA_900067695.1-2016-11-09.one_line	11960690255	250	4	GACT_1233	16427250	19.0477	17.8146	19.2596	24.018	17.5899	17.9184	17.7874
DNA-Genome-Picea-abies-GCA_900067695.1-2016-11-09.one_line	11960690255	250	4	CATG_1233	6345000	16.9861	15.0491	17.0783	21.775	14.951	15.3266	14.9486
DNA-Genome-Picea-abies-GCA_900067695.1-2016-11-09.one_line	11960690255	250	4	ATGC_1234	4623250	21.8506	20.923	22.1644	25.441	20.6119	20.6464	20.5379
DNA-Genome-Picea-abies-GCA_900067695.1-2016-11-09.one_line	11960690255	250	4	GTAC_1233	4621250	17.8207	15.6468	17.9062	22.1697	15.4999	15.812	15.5013
DNA-Genome-Picea-abies-GCA_900067695.1-2016-11-09.one_line	11960690255	250	4	TACG_1234	4563000	21.6492	20.653	21.9624	25.3213	20.3471	20.4164	20.2858
DNA-Genome-Picea-abies-GCA_900067695.1-2016-11-09.one_line	11960690255	250	4	TAGC_1234	4355500	22.0809	21.3117	22.4206	25.5768	21.1261	21.1403	21.0441
DNA-Genome-Picea-abies-GCA_900067695.1-2016-11-09.one_line	11960690255	250	4	ATCG_1234	4335750	22.0125	21.171	22.3654	25.5661	20.9898	21.0177	20.9173
DNA-Genome-Picea-abies-GCA_900067695.1-2016-11-09.one_line	11960690255	250	4	CTGA_2223	1453500	23.2843	22.5372	23.4784	25.868	21.8248	21.8091	21.7827
DNA-Genome-Picea-abies-GCA_900067695.1-2016-11-09.one_line	11960690255	250	4	ACGT_2223	1288500	23.2697	22.5218	23.4912	25.8119	21.8311	21.8368	21.7962
DNA-Genome-Picea-abies-GCA_900067695.1-2016-11-09.one_line	11960690255	250	4	TCAG_1234	827750	22.0469	21.3041	22.4193	24.6146	20.9985	20.9741	20.8952
DNA-Genome-Picea-abies-GCA_900067695.1-2016-11-09.one_line	11960690255	250	4	AGTC_1234	778000	22.1276	21.5174	22.5224	24.7174	21.2125	21.1469	21.0972
DNA-Genome-Picea-abies-GCA_900067695.1-2016-11-09.one_line	11960690255	250	4	ACTG_1234	421750	20.7201	20.3483	21.1201	23.2299	20.4358	20.3976	20.2461
DNA-Genome-Picea-abies-GCA_900067695.1-2016-11-09.one_line	11960690255	250	4	TGAC_1234	362000	21.2025	20.8453	21.6039	23.7127	20.9823	20.8837	20.8099
DNA-Genome-Picea-abies-GCA_900067695.1-2016-11-09.one_line	11960690255	250	4	CGAT_1233	273000	18.3813	15.7447	18.4593	20.067	16.385	16.548	16.3443
DNA-Genome-Picea-abies-GCA_900067695.1-2016-11-09.one_line	11960690255	250	4	GCAT_1233	220500	18.8163	16.029	18.8961	20.4884	16.6934	16.7379	16.5986
DNA-Genome-Picea-abies-GCA_900067695.1-2016-11-09.one_line	11960690255	250	4	TCGA_1234	173000	22.9058	22.8555	23.385	25.6486	22.9699	22.7942	22.7884
DNA-Genome-Picea-abies-GCA_900067695.1-2016-11-09.one_line	11960690255	250	4	AGCT_1234	144500	22.8948	22.8796	23.4145	25.7121	23.1993	22.9661	22.9343
DNA-Genome-Picea-abies-GCA_900067695.1-2016-11-09.one_line	11960690255	250	4	CTAG_1234	109250	20.9172	22.0586	21.6549	24.27	23.114	22.7606	22.8577
DNA-Genome-Picea-abies-GCA_900067695.1-2016-11-09.one_line	11960690255	250	4	GATC_1234	95000	21.0442	21.9484	21.7389	24.4211	23.1305	22.7537	22.8463
DNA-Genome-Picea-abies-GCA_900067695.1-2016-11-09.one_line	11960690255	250	4	ACGT_1234	86250	23.2359	23.1664	23.8122	26.0835	24.1809	23.709	23.8145
DNA-Genome-Picea-abies-GCA_900067695.1-2016-11-09.one_line	11960690255	250	4	TGCA_1234	83750	23.1487	23.0436	23.7278	25.846	23.797	23.4412	23.5606
DNA-Genome-Picea-abies-GCA_900067695.1-2016-11-09.one_line	11960690255	250	4	TACG_1333	75750	22.6455	22.5399	23.1947	25.237	23.0191	22.8884	22.8964
DNA-Genome-Picea-abies-GCA_900067695.1-2016-11-09.one_line	11960690255	250	4	ACTG_1333	71750	22.7875	22.7624	23.3951	25.5805	23.6544	23.3226	23.4815
DNA-Genome-Picea-abies-GCA_900067695.1-2016-11-09.one_line	11960690255	250	4	CAT_122	29750	15.1059	17.4387	15.758	18.6756	18.4437	17.8487	18.0571
DNA-Genome-Picea-abies-GCA_900067695.1-2016-11-09.one_line	11960690255	250	4	CATG_1234	28250	23.469	23.5292	24.2478	26.5451	25.6743	25.0159	25.246
DNA-Genome-Picea-abies-GCA_900067695.1-2016-11-09.one_line	11960690255	250	4	GAT_122	20250	15.1012	17.2395	15.8617	18.7901	19.0914	18.3901	18.5679
DNA-Genome-Picea-abies-GCA_900067695.1-2016-11-09.one_line	11960690255	250	4	GTAC_1234	18000	23.6167	23.6333	24.4667	26.8111	26.5444	25.3056	25.7556
DNA-Genome-Picea-abies-GCA_900067695.1-2016-11-09.one_line	11960690255	250	4	CTGA_1234	13500	23.5852	23.6593	24.4444	26.6074	26.9926	26.037	26.3407
DNA-Genome-Picea-abies-GCA_900067695.1-2016-11-09.one_line	11960690255	250	4	TAG_122	11250	16.0978	15.0844	17.0311	18.9067	18.4978	17.3067	17.6
DNA-Genome-Picea-abies-GCA_900067695.1-2016-11-09.one_line	11960690255	250	4	GACT_1234	10500	23.8	24.2952	24.8571	27.1048	28.5238	27.019	27.3524
DNA-Genome-Picea-abies-GCA_900067695.1-2016-11-09.one_line	11960690255	250	4	ACT_122	8250	16.2667	14.7515	17.3818	19.3455	18.8242	17.3333	17.7939
DNA-Genome-Picea-abies-GCA_900067695.1-2016-11-09.one_line	11960690255	250	4	TAC_122	7000	16.1429	14.4	17.0286	19.1286	19.6714	17.7571	18.1143
DNA-Genome-Picea-abies-GCA_900067695.1-2016-11-09.one_line	11960690255	250	4	ATG_122	4500	18.0222	15.6	19.1111	20.9333	21.5556	19.3556	19.9111
DNA-Genome-Picea-abies-GCA_900067695.1-2016-11-09.one_line	11960690255	250	4	CAGT_1234	3750	25.4933	24.08	26.6667	28.4	31.7333	28.5867	29.44
DNA-Genome-Picea-abies-GCA_900067695.1-2016-11-09.one_line	11960690255	250	4	GTCA_1234	3750	25.7067	24.8533	27.0933	29.12	32.56	29.8133	30.2933
DNA-Genome-Picea-abies-GCA_900067695.1-2016-11-09.one_line	11960690255	250	4	ATNC_1234	1750	17.2571	17.1429	19.2	21.2	31.2	22.6286	24.2286
DNA-Genome-Picea-abies-GCA_900067695.1-2016-11-09.one_line	11960690255	250	4	CGTA_1234	1500	28.1333	27.1333	30.1333	31.6	41.6	34.6667	36.8
DNA-Genome-Picea-abies-GCA_900067695.1-2016-11-09.one_line	11960690255	250	4	GATN_1233	1250	19.28	18.64	21.28	22.88	34.8	23.6	25.92
DNA-Genome-Picea-abies-GCA_900067695.1-2016-11-09.one_line	11960690255	250	4	GCTA_1234	1000	31	29.5	33.8	35	50	39.5	42.8
DNA-Genome-Picea-abies-GCA_900067695.1-2016-11-09.one_line	11960690255	250	4	CTAN_1233	750	22.4	22.5333	25.6	26.2667	43.4667	28.5333	32.5333
DNA-Genome-Picea-abies-GCA_900067695.1-2016-11-09.one_line	11960690255	250	4	CGAT_1234	500	36.4	30.2	40.8	39	67.6	46.8	53.6
DNA-Genome-Picea-abies-GCA_900067695.1-2016-11-09.one_line	11960690255	250	4	GCAT_1234	500	36	29.6	39.6	39	65	44.2	51.2
DNA-Genome-Picea-abies-GCA_900067695.1-2016-11-09.one_line	11960690255	250	4	GANC_1234	500	25.8	23.6	30.8	31.4	53.6	32.8	39.2
DNA-Genome-Picea-abies-GCA_900067695.1-2016-11-09.one_line	11960690255	250	4	ATGN_1233	500	20	10	22.4	19	42.6	18.8	24.8
DNA-Genome-Picea-abies-GCA_900067695.1-2016-11-09.one_line	11960690255	250	4	TANC_1234	500	23.6	20	28.4	29	54.4	30.2	36.8
DNA-Genome-Picea-abies-GCA_900067695.1-2016-11-09.one_line	11960690255	250	4	GAC_122	250	27.2	24.8	38.4	31.2	76	34.4	48
DNA-Genome-Picea-abies-GCA_900067695.1-2016-11-09.one_line	11960690255	250	4	AT_11	250	23.6	14.8	32	25.2	66.4	24.8	38.4
DNA-Genome-Picea-abies-GCA_900067695.1-2016-11-09.one_line	11960690255	250	4	CATG_1333	250	46	34	55.2	48.8	100.4	58.8	72
DNA-Genome-Picea-abies-GCA_900067695.1-2016-11-09.one_line	11960690255	250	4	TAGN_1233	250	39.6	24.8	46.4	44	85.2	43.6	57.6
DNA-Genome-Picea-abies-GCA_900067695.1-2016-11-09.one_line	11960690255	500	4	ACTG_2222	7857101255	23.7297	19.5634	23.6272	26.9404	17.5083	20.4382	20.471
DNA-Genome-Picea-abies-GCA_900067695.1-2016-11-09.one_line	11960690255	500	4	TACG_1233	1859677000	22.917	20.4359	23.0475	26.4211	19.0188	21.3662	21.3671
DNA-Genome-Picea-abies-GCA_900067695.1-2016-11-09.one_line	11960690255	500	4	ATCG_1233	1818764000	22.9307	20.4646	23.0737	26.4172	19.0486	21.3975	21.3889
DNA-Genome-Picea-abies-GCA_900067695.1-2016-11-09.one_line	11960690255	500	4	TCAG_1233	114928000	20.4117	16.7708	20.0731	25.3836	15.3682	17.084	16.9818
DNA-Genome-Picea-abies-GCA_900067695.1-2016-11-09.one_line	11960690255	500	4	AGCT_1233	102366000	20.4843	16.8469	20.1358	25.3984	15.4584	17.0921	16.9962
DNA-Genome-Picea-abies-GCA_900067695.1-2016-11-09.one_line	11960690255	500	4	ACTG_2223	45081000	22.7297	20.2389	22.5349	26.7185	18.7973	19.9088	19.8316
DNA-Genome-Picea-abies-GCA_900067695.1-2016-11-09.one_line	11960690255	500	4	ATGC_2223	43893500	22.8831	20.4612	22.6993	26.7416	19.0043	20.081	20.0052
DNA-Genome-Picea-abies-GCA_900067695.1-2016-11-09.one_line	11960690255	500	4	ACTG_1233	32205000	19.7963	16.5575	19.6052	24.8355	16.2045	17.2041	17.0095
DNA-Genome-Picea-abies-GCA_900067695.1-2016-11-09.one_line	11960690255	500	4	TGAC_1233	28517000	19.957	16.6775	19.5006	24.7883	16.3707	17.244	17.0589
DNA-Genome-Picea-abies-GCA_900067695.1-2016-11-09.one_line	11960690255	500	4	CTAG_1233	10714000	18.3149	17.9665	18.5617	22.6198	17.8843	18.0669	17.8946
DNA-Genome-Picea-abies-GCA_900067695.1-2016-11-09.one_line	11960690255	500	4	TACG_1234	8890000	21.7849	20.666	22.0622	25.7575	19.9996	20.1024	19.9503
DNA-Genome-Picea-abies-GCA_900067695.1-2016-11-09.one_line	11960690255	500	4	ATGC_1234	8849000	21.9263	20.8439	22.2056	25.8188	20.1771	20.2485	20.1301
DNA-Genome-Picea-abies-GCA_900067695.1-2016-11-09.one_line	11960690255	500	4	ATCG_1234	7290500	22.3776	21.7856	22.7267	25.9939	21.2821	21.2937	21.2382
DNA-Genome-Picea-abies-GCA_900067695.1-2016-11-09.one_line	11960690255	500	4	TAGC_1234	7237000	22.4564	21.9363	22.7885	26.0037	21.4225	21.4436	21.3789
DNA-Genome-Picea-abies-GCA_900067695.1-2016-11-09.one_line	11960690255	500	4	GACT_1233	7019500	19.1562	18.7245	19.4273	23.2071	18.6333	18.7147	18.6341
DNA-Genome-Picea-abies-GCA_900067695.1-2016-11-09.one_line	11960690255	500	4	CTGA_2223	1529000	23.1165	22.0729	23.2866	25.6878	21.0126	21.0225	20.9787
DNA-Genome-Picea-abies-GCA_900067695.1-2016-11-09.one_line	11960690255	500	4	ACGT_2223	1384500	23.0651	22.0665	23.2582	25.6203	21.0737	21.0924	21.0196
DNA-Genome-Picea-abies-GCA_900067695.1-2016-11-09.one_line	11960690255	500	4	CATG_1233	1119000	17.6959	14.8075	17.7651	20.0035	14.8428	15.1123	14.8236
DNA-Genome-Picea-abies-GCA_900067695.1-2016-11-09.one_line	11960690255	500	4	TCAG_1234	985500	21.9901	21.0869	22.3121	24.6733	20.2377	20.211	20.1636
DNA-Genome-Picea-abies-GCA_900067695.1-2016-11-09.one_line	11960690255	500	4	AGTC_1234	950500	22.1482	21.4207	22.4926	24.7752	20.5871	20.5685	20.4595
DNA-Genome-Picea-abies-GCA_900067695.1-2016-11-09.one_line	11960690255	500	4	GTAC_1233	814500	18.6099	15.4621	18.6762	20.2428	15.3738	15.5664	15.3282
DNA-Genome-Picea-abies-GCA_900067695.1-2016-11-09.one_line	11960690255	500	4	ACTG_1234	292000	21.0199	20.701	21.4397	23.5243	20.5483	20.449	20.3986
DNA-Genome-Picea-abies-GCA_900067695.1-2016-11-09.one_line	11960690255	500	4	TGAC_1234	277000	21.4859	21.3805	21.909	23.9906	21.2545	21.1653	21.1264
DNA-Genome-Picea-abies-GCA_900067695.1-2016-11-09.one_line	11960690255	500	4	TCGA_1234	173000	22.9549	22.7965	23.3676	25.5659	22.3052	21.9908	22.2173
DNA-Genome-Picea-abies-GCA_900067695.1-2016-11-09.one_line	11960690255	500	4	AGCT_1234	145500	22.9409	22.8392	23.3897	25.6646	22.3155	22.2048	22.1773
DNA-Genome-Picea-abies-GCA_900067695.1-2016-11-09.one_line	11960690255	500	4	CTAG_1234	117500	20.3898	22.0119	21.0621	23.8085	22.5804	22.3004	22.383
DNA-Genome-Picea-abies-GCA_900067695.1-2016-11-09.one_line	11960690255	500	4	GATC_1234	97000	20.3041	21.733	20.9402	23.733	22.5474	22.1938	22.2804
DNA-Genome-Picea-abies-GCA_900067695.1-2016-11-09.one_line	11960690255	500	4	TGCA_1234	68500	23.3504	23.8715	23.9358	26.1504	24.692	24.4569	24.5839
DNA-Genome-Picea-abies-GCA_900067695.1-2016-11-09.one_line	11960690255	500	4	ACGT_1234	66000	23.2576	23.5848	23.8394	26.1197	24.4136	24.0167	24.1636
DNA-Genome-Picea-abies-GCA_900067695.1-2016-11-09.one_line	11960690255	500	4	GCAT_1233	44500	18.1708	14.0764	18.1618	19.5573	15.8449	15.4989	15.6584
DNA-Genome-Picea-abies-GCA_900067695.1-2016-11-09.one_line	11960690255	500	4	CGAT_1233	35000	18.4171	14.2486	18.4	19.8057	16.0943	15.8457	15.8857
DNA-Genome-Picea-abies-GCA_900067695.1-2016-11-09.one_line	11960690255	500	4	ACTG_1333	12000	24.0833	25.775	25.1667	27.325	28.4333	27.5	27.8
DNA-Genome-Picea-abies-GCA_900067695.1-2016-11-09.one_line	11960690255	500	4	TACG_1333	10500	24.1429	25.9048	25.1238	27.3714	28.9619	28.2476	28.1524
DNA-Genome-Picea-abies-GCA_900067695.1-2016-11-09.one_line	11960690255	500	4	CTGA_1234	10500	23.3524	22.1429	23.5238	26.0476	25.7714	24.7619	25.1048
DNA-Genome-Picea-abies-GCA_900067695.1-2016-11-09.one_line	11960690255	500	4	CATG_1234	8500	24.0824	24.1882	25.1765	27.5765	28.1882	26.6941	27.2471
DNA-Genome-Picea-abies-GCA_900067695.1-2016-11-09.one_line	11960690255	500	4	GACT_1234	6500	24.3538	24.1692	25.3538	27.4462	29.1846	27.4	27.9385
DNA-Genome-Picea-abies-GCA_900067695.1-2016-11-09.one_line	11960690255	500	4	GTAC_1234	6500	24.4923	23.8154	25.5385	27.7846	28.8462	26.9231	27.6923
DNA-Genome-Picea-abies-GCA_900067695.1-2016-11-09.one_line	11960690255	500	4	GCAT_1234	1500	27.2	23.8	28.4	28.8	39.0667	31.2667	33.3333
DNA-Genome-Picea-abies-GCA_900067695.1-2016-11-09.one_line	11960690255	500	4	TAC_122	1000	12.3	10.3	13.6	13	26	13.8	16.8
DNA-Genome-Picea-abies-GCA_900067695.1-2016-11-09.one_line	11960690255	500	4	GTCA_1234	500	35.8	32.6	40	39.6	67.2	46.6	52.8
DNA-Genome-Picea-abies-GCA_900067695.1-2016-11-09.one_line	11960690255	500	4	CGTA_1234	500	34	27.4	37.6	37.2	61	40.6	47.2
DNA-Genome-Picea-abies-GCA_900067695.1-2016-11-09.one_line	11960690255	500	4	CAGT_1234	500	35.6	24.4	38	37.4	59.8	39	45.6
DNA-Genome-Picea-abies-GCA_900067695.1-2016-11-09.one_line	11960690255	750	4	ACTG_2222	8235431255	23.7158	19.5706	23.6267	26.9294	17.4946	20.4559	20.4891
DNA-Genome-Picea-abies-GCA_900067695.1-2016-11-09.one_line	11960690255	750	4	TACG_1233	1697063250	22.9899	20.5391	23.1358	26.4526	19.1116	21.4358	21.4281
DNA-Genome-Picea-abies-GCA_900067695.1-2016-11-09.one_line	11960690255	750	4	ATCG_1233	1661821500	23.0043	20.5746	23.1624	26.4474	19.1473	21.4629	21.4683
DNA-Genome-Picea-abies-GCA_900067695.1-2016-11-09.one_line	11960690255	750	4	TCAG_1233	75004500	20.3064	16.5974	19.9237	25.2808	15.378	16.7927	16.6988
DNA-Genome-Picea-abies-GCA_900067695.1-2016-11-09.one_line	11960690255	750	4	ACTG_2223	67786500	22.8434	20.1204	22.692	26.7703	18.2388	19.8175	19.7685
DNA-Genome-Picea-abies-GCA_900067695.1-2016-11-09.one_line	11960690255	750	4	AGCT_1233	67527750	20.2908	16.5996	20.0261	25.2913	15.4098	16.7373	16.6467
DNA-Genome-Picea-abies-GCA_900067695.1-2016-11-09.one_line	11960690255	750	4	ATGC_2223	66072750	22.9744	20.367	22.8519	26.7814	18.46	20.0087	19.9691
DNA-Genome-Picea-abies-GCA_900067695.1-2016-11-09.one_line	11960690255	750	4	ACTG_1233	16375500	19.1824	16.3548	19.2794	24.4836	16.2865	16.7355	16.5339
DNA-Genome-Picea-abies-GCA_900067695.1-2016-11-09.one_line	11960690255	750	4	TGAC_1233	14745750	19.3408	16.472	19.4048	24.4425	16.3994	16.7724	16.5732
DNA-Genome-Picea-abies-GCA_900067695.1-2016-11-09.one_line	11960690255	750	4	TACG_1234	12560250	21.809	20.631	22.0676	25.9415	19.8026	19.975	19.8393
DNA-Genome-Picea-abies-GCA_900067695.1-2016-11-09.one_line	11960690255	750	4	ATGC_1234	12362250	21.9296	20.7713	22.1848	25.9578	19.9514	20.0991	19.9834
DNA-Genome-Picea-abies-GCA_900067695.1-2016-11-09.one_line	11960690255	750	4	ATCG_1234	9488250	22.5712	22.1496	22.9101	26.1949	21.4728	21.5133	21.4532
DNA-Genome-Picea-abies-GCA_900067695.1-2016-11-09.one_line	11960690255	750	4	TAGC_1234	9352500	22.6416	22.2635	22.9671	26.1862	21.5997	21.6198	21.576
DNA-Genome-Picea-abies-GCA_900067695.1-2016-11-09.one_line	11960690255	750	4	CTAG_1233	5605500	17.9149	18.0338	18.191	21.7629	18.234	18.375	18.2211
DNA-Genome-Picea-abies-GCA_900067695.1-2016-11-09.one_line	11960690255	750	4	GACT_1233	3426750	18.499	18.68	18.7968	22.0544	18.8973	18.9623	18.8992
DNA-Genome-Picea-abies-GCA_900067695.1-2016-11-09.one_line	11960690255	750	4	CTGA_2223	1398000	23.1162	21.8379	23.2549	25.6307	20.6725	20.676	20.671
DNA-Genome-Picea-abies-GCA_900067695.1-2016-11-09.one_line	11960690255	750	4	ACGT_2223	1303500	23.0341	21.9622	23.2112	25.5546	20.8175	20.8499	20.7985
DNA-Genome-Picea-abies-GCA_900067695.1-2016-11-09.one_line	11960690255	750	4	TCAG_1234	972750	22.1587	21.201	22.4551	24.8168	20.1163	20.1123	20.0981
DNA-Genome-Picea-abies-GCA_900067695.1-2016-11-09.one_line	11960690255	750	4	AGTC_1234	957750	22.2801	21.5117	22.5986	24.9338	20.4186	20.366	20.3598
DNA-Genome-Picea-abies-GCA_900067695.1-2016-11-09.one_line	11960690255	750	4	TGAC_1234	228750	21.4627	21.0745	21.7871	23.9292	20.8691	20.7532	20.7545
DNA-Genome-Picea-abies-GCA_900067695.1-2016-11-09.one_line	11960690255	750	4	ACTG_1234	221250	21.2646	20.8569	21.609	23.7234	20.7417	20.6423	20.6445
DNA-Genome-Picea-abies-GCA_900067695.1-2016-11-09.one_line	11960690255	750	4	CATG_1233	217500	20.1899	16.9995	20.3255	22.0584	17.3402	17.3834	17.2947
DNA-Genome-Picea-abies-GCA_900067695.1-2016-11-09.one_line	11960690255	750	4	TCGA_1234	171000	22.9959	22.5351	23.3626	25.5287	21.7988	21.493	21.6327
DNA-Genome-Picea-abies-GCA_900067695.1-2016-11-09.one_line	11960690255	750	4	GTAC_1233	149250	21.4385	18.471	21.6174	23.5404	18.9065	18.798	18.8436
DNA-Genome-Picea-abies-GCA_900067695.1-2016-11-09.one_line	11960690255	750	4	AGCT_1234	135750	22.9562	22.26	23.3576	25.5698	21.4851	21.284	21.4306
DNA-Genome-Picea-abies-GCA_900067695.1-2016-11-09.one_line	11960690255	750	4	CTAG_1234	93750	19.3088	20.9835	19.9552	22.6784	21.6309	21.2395	21.3376
DNA-Genome-Picea-abies-GCA_900067695.1-2016-11-09.one_line	11960690255	750	4	GATC_1234	89250	19.6246	20.8549	20.2331	22.7373	21.5081	21.098	21.3244
DNA-Genome-Picea-abies-GCA_900067695.1-2016-11-09.one_line	11960690255	750	4	ACGT_1234	48750	23.1138	23.2513	23.6103	25.8256	24.1538	23.6062	23.8523
DNA-Genome-Picea-abies-GCA_900067695.1-2016-11-09.one_line	11960690255	750	4	TGCA_1234	43500	23.308	23.6598	23.8345	26.0621	24.7954	24.3011	24.4138
DNA-Genome-Picea-abies-GCA_900067695.1-2016-11-09.one_line	11960690255	750	4	GCAT_1233	8250	17.9273	13.503	17.4061	19.2121	18.3394	16.8364	17.1152
DNA-Genome-Picea-abies-GCA_900067695.1-2016-11-09.one_line	11960690255	750	4	CGAT_1233	6750	15.6444	10.8296	13.0074	16.6963	15.0074	13.4519	13.9852
DNA-Genome-Picea-abies-GCA_900067695.1-2016-11-09.one_line	11960690255	750	4	CTGA_1234	4500	22.1778	20.5111	22.7111	24.4889	26.1556	23.8889	24.6222
DNA-Genome-Picea-abies-GCA_900067695.1-2016-11-09.one_line	11960690255	750	4	ACTG_1333	4500	25.2222	26.6889	26.5778	28.6444	32.1111	30.2444	30.5778
DNA-Genome-Picea-abies-GCA_900067695.1-2016-11-09.one_line	11960690255	750	4	TACG_1333	3750	25.4133	26.8	26.9333	28.8533	33.52	31.1733	31.5733
DNA-Genome-Picea-abies-GCA_900067695.1-2016-11-09.one_line	11960690255	750	4	GTAC_1234	3750	25.36	26.0533	26.8267	28.5867	33.0133	30.56	31.1467
DNA-Genome-Picea-abies-GCA_900067695.1-2016-11-09.one_line	11960690255	750	4	CATG_1234	1500	26.9333	25.8667	28.9333	30.3333	39.8	32.8	35.2
DNA-Genome-Picea-abies-GCA_900067695.1-2016-11-09.one_line	11960690255	750	4	GACT_1234	1500	25.6667	20.2667	26.4	27.0667	34.2	26.7333	29.3333
DNA-Genome-Picea-abies-GCA_900067695.1-2016-11-09.one_line	11960690255	750	4	CGTA_1234	750	32.2667	28.1333	34.6667	35.4667	53.2	39.3333	43.7333
DNA-Genome-Picea-abies-GCA_900067695.1-2016-11-09.one_line	11960690255	1000	4	ACTG_2222	8493859255	23.7096	19.6004	23.6287	26.9216	17.5253	20.4886	20.5222
DNA-Genome-Picea-abies-GCA_900067695.1-2016-11-09.one_line	11960690255	1000	4	TACG_1233	1569730000	23.0382	20.6353	23.1944	26.4735	19.2091	21.5083	21.501
DNA-Genome-Picea-abies-GCA_900067695.1-2016-11-09.one_line	11960690255	1000	4	ATCG_1233	1539868000	23.0529	20.6688	23.2185	26.4649	19.2458	21.5313	21.5372
DNA-Genome-Picea-abies-GCA_900067695.1-2016-11-09.one_line	11960690255	1000	4	ACTG_2223	89955000	22.9965	20.1137	22.8054	26.7901	17.9227	19.8282	19.7685
DNA-Genome-Picea-abies-GCA_900067695.1-2016-11-09.one_line	11960690255	1000	4	ATGC_2223	87061000	23.1219	20.3642	22.9549	26.8077	18.1423	20.0104	19.9621
DNA-Genome-Picea-abies-GCA_900067695.1-2016-11-09.one_line	11960690255	1000	4	TCAG_1233	51990000	20.1756	16.5963	19.7923	25.1822	15.6118	16.6975	16.6191
DNA-Genome-Picea-abies-GCA_900067695.1-2016-11-09.one_line	11960690255	1000	4	AGCT_1233	47273000	20.2286	16.5782	19.8861	25.1833	15.6252	16.6237	16.551
DNA-Genome-Picea-abies-GCA_900067695.1-2016-11-09.one_line	11960690255	1000	4	TACG_1234	15613000	21.8199	20.5871	22.0643	26.0319	19.7033	19.9423	19.8321
DNA-Genome-Picea-abies-GCA_900067695.1-2016-11-09.one_line	11960690255	1000	4	ATGC_1234	15331000	21.9482	20.7417	22.1937	26.0498	19.8367	20.0646	19.9704
DNA-Genome-Picea-abies-GCA_900067695.1-2016-11-09.one_line	11960690255	1000	4	TAGC_1234	11384000	22.7624	22.4681	23.0798	26.2931	21.6896	21.743	21.7095
DNA-Genome-Picea-abies-GCA_900067695.1-2016-11-09.one_line	11960690255	1000	4	ATCG_1234	11340000	22.6948	22.3575	23.0247	26.2881	21.5885	21.6438	21.6076
DNA-Genome-Picea-abies-GCA_900067695.1-2016-11-09.one_line	11960690255	1000	4	ACTG_1233	8549000	19.665	16.7759	19.7707	24.2466	16.8108	16.9954	16.8089
DNA-Genome-Picea-abies-GCA_900067695.1-2016-11-09.one_line	11960690255	1000	4	TGAC_1233	7797000	19.7943	16.9036	19.8658	24.1824	16.8992	17.0921	16.9176
DNA-Genome-Picea-abies-GCA_900067695.1-2016-11-09.one_line	11960690255	1000	4	CTAG_1233	3420000	17.4749	17.7377	17.7401	21.097	18.0866	18.1971	18.0671
DNA-Genome-Picea-abies-GCA_900067695.1-2016-11-09.one_line	11960690255	1000	4	GACT_1233	2052000	17.8641	18.1105	18.1675	21.294	18.4522	18.5098	18.4279
DNA-Genome-Picea-abies-GCA_900067695.1-2016-11-09.one_line	11960690255	1000	4	CTGA_2223	1341000	22.9549	21.3051	23.0646	25.4486	20.0986	20.072	20.1098
DNA-Genome-Picea-abies-GCA_900067695.1-2016-11-09.one_line	11960690255	1000	4	ACGT_2223	1297000	22.8167	21.3119	22.9689	25.3604	20.1501	20.1194	20.0981
DNA-Genome-Picea-abies-GCA_900067695.1-2016-11-09.one_line	11960690255	1000	4	TCAG_1234	919000	22.1733	21.5052	22.4792	24.7416	20.3979	20.2971	20.3504
DNA-Genome-Picea-abies-GCA_900067695.1-2016-11-09.one_line	11960690255	1000	4	AGTC_1234	901000	22.3625	21.8396	22.6983	24.9718	20.6484	20.5699	20.5789
DNA-Genome-Picea-abies-GCA_900067695.1-2016-11-09.one_line	11960690255	1000	4	ACTG_1234	178000	21.8034	21.5006	22.173	24.3	21.2764	21.2365	21.2494
DNA-Genome-Picea-abies-GCA_900067695.1-2016-11-09.one_line	11960690255	1000	4	TGAC_1234	161000	21.7366	21.2882	22.0894	24.2292	21.0342	20.9025	20.9491
DNA-Genome-Picea-abies-GCA_900067695.1-2016-11-09.one_line	11960690255	1000	4	TCGA_1234	152000	22.7625	21.923	23.0855	25.2033	20.7809	20.5382	20.6684
DNA-Genome-Picea-abies-GCA_900067695.1-2016-11-09.one_line	11960690255	1000	4	AGCT_1234	147000	22.8116	22.2905	23.1837	25.3027	21.0537	20.8061	20.9959
DNA-Genome-Picea-abies-GCA_900067695.1-2016-11-09.one_line	11960690255	1000	4	CATG_1233	88000	18.9591	15.7409	19.1295	20.6727	16.5432	16.433	16.4545
DNA-Genome-Picea-abies-GCA_900067695.1-2016-11-09.one_line	11960690255	1000	4	CTAG_1234	78000	19.3385	20.8167	19.9667	22.5487	21.4179	21.0923	21.1846
DNA-Genome-Picea-abies-GCA_900067695.1-2016-11-09.one_line	11960690255	1000	4	GATC_1234	73000	18.8795	20.1658	19.4685	21.9849	20.8589	20.4836	20.5973
DNA-Genome-Picea-abies-GCA_900067695.1-2016-11-09.one_line	11960690255	1000	4	GTAC_1233	52000	21.4288	19.2827	21.7038	23.8135	20.3096	19.8538	20.1462
DNA-Genome-Picea-abies-GCA_900067695.1-2016-11-09.one_line	11960690255	1000	4	ACGT_1234	38000	23.5395	24.0895	24.1474	26.5289	25.3526	24.9447	25.0632
DNA-Genome-Picea-abies-GCA_900067695.1-2016-11-09.one_line	11960690255	1000	4	TGCA_1234	29000	23.7793	24.6966	24.4276	26.7552	26.4621	26.0241	26.1379
DNA-Genome-Picea-abies-GCA_900067695.1-2016-11-09.one_line	11960690255	1000	4	GCAT_1233	5000	15.22	12	15.36	16.48	17.04	14.88	15.52
DNA-Genome-Picea-abies-GCA_900067695.1-2016-11-09.one_line	11960690255	1000	4	CGAT_1233	2000	18.8	15.45	18.9	20	25.5	19.9	21.6
DNA-Genome-Picea-abies-GCA_900067695.1-2016-11-09.one_line	11960690255	1000	4	CATG_1234	2000	25.95	25.95	28.1	29.75	37.9	32.5	34.2
DNA-Genome-Picea-abies-GCA_900067695.1-2016-11-09.one_line	11960690255	1000	4	TACG_1333	2000	26.85	27	28.6	30.35	38.5	33.55	35
DNA-Genome-Picea-abies-GCA_900067695.1-2016-11-09.one_line	11960690255	1000	4	CTGA_1234	1000	20.9	13	21	21	30.3	20	23.2
DNA-Genome-Picea-abies-GCA_900067695.1-2016-11-09.one_line	11960690255	1000	4	GCAT_1234	1000	18.9	12.7	19.6	18.8	30.9	18.7	21.6
DNA-Genome-Picea-abies-GCA_900067695.1-2016-11-09.one_line	11960690255	1000	4	ACTG_1333	1000	29.9	27	32.4	33.3	48.3	37.4	40.8
DNA-Genome-Picea-abies-GCA_900067695.1-2016-11-09.one_line	11960690255	2500	4	ACTG_2222	9217885255	23.696	19.7642	23.6484	26.9004	17.6734	20.6492	20.6829
DNA-Genome-Picea-abies-GCA_900067695.1-2016-11-09.one_line	11960690255	2500	4	TACG_1233	1118392500	23.1823	21.0558	23.3857	26.5249	19.6785	21.8423	21.8422
DNA-Genome-Picea-abies-GCA_900067695.1-2016-11-09.one_line	11960690255	2500	4	ATCG_1233	1099425000	23.1951	21.0889	23.399	26.5145	19.717	21.8673	21.8873
DNA-Genome-Picea-abies-GCA_900067695.1-2016-11-09.one_line	11960690255	2500	4	ACTG_2223	208352500	23.3014	20.4285	23.1236	26.846	17.6115	20.0636	20.0465
DNA-Genome-Picea-abies-GCA_900067695.1-2016-11-09.one_line	11960690255	2500	4	ATGC_2223	201090000	23.3832	20.6629	23.2699	26.854	17.8014	20.2414	20.242
DNA-Genome-Picea-abies-GCA_900067695.1-2016-11-09.one_line	11960690255	2500	4	TACG_1234	27890000	22.4666	21.0474	22.4351	26.2764	19.8205	20.3993	20.3447
DNA-Genome-Picea-abies-GCA_900067695.1-2016-11-09.one_line	11960690255	2500	4	ATGC_1234	27652500	22.5193	21.2028	22.4772	26.2478	19.9542	20.5212	20.4496
DNA-Genome-Picea-abies-GCA_900067695.1-2016-11-09.one_line	11960690255	2500	4	TAGC_1234	18785000	23.1063	23.0147	23.3436	26.4804	21.9437	22.1905	22.1741
DNA-Genome-Picea-abies-GCA_900067695.1-2016-11-09.one_line	11960690255	2500	4	ATCG_1234	18612500	23.0831	22.8431	23.3279	26.5034	21.807	22.0665	22.068
DNA-Genome-Picea-abies-GCA_900067695.1-2016-11-09.one_line	11960690255	2500	4	TCAG_1233	9580000	20.6159	17.6608	20.7474	24.9542	17.2681	17.2658	17.2771
DNA-Genome-Picea-abies-GCA_900067695.1-2016-11-09.one_line	11960690255	2500	4	AGCT_1233	8705000	20.6324	17.6335	20.7766	24.9063	17.1902	17.1733	17.1824
DNA-Genome-Picea-abies-GCA_900067695.1-2016-11-09.one_line	11960690255	2500	4	CTGA_2223	872500	22.0496	19.9932	22.1841	24.1199	18.7166	18.6717	18.648
DNA-Genome-Picea-abies-GCA_900067695.1-2016-11-09.one_line	11960690255	2500	4	ACGT_2223	842500	21.6177	19.7294	21.7759	23.6567	18.582	18.5938	18.5809
DNA-Genome-Picea-abies-GCA_900067695.1-2016-11-09.one_line	11960690255	2500	4	CTAG_1233	530000	17.2709	17.3049	17.6038	20.0474	18.0277	17.943	17.9502
DNA-Genome-Picea-abies-GCA_900067695.1-2016-11-09.one_line	11960690255	2500	4	AGTC_1234	502500	22.4754	22.7033	22.7765	25.163	21.3413	21.2981	21.3572
DNA-Genome-Picea-abies-GCA_900067695.1-2016-11-09.one_line	11960690255	2500	4	TCAG_1234	425000	22.4576	23.0847	22.8287	25.2042	21.7701	21.6233	21.7741
DNA-Genome-Picea-abies-GCA_900067695.1-2016-11-09.one_line	11960690255	2500	4	GACT_1233	422500	18.3058	18.2521	18.684	21.1418	18.9484	18.8667	18.9084
DNA-Genome-Picea-abies-GCA_900067695.1-2016-11-09.one_line	11960690255	2500	4	ACTG_1233	292500	20.6547	19.134	20.9805	23.108	19.975	19.9706	19.9576
DNA-Genome-Picea-abies-GCA_900067695.1-2016-11-09.one_line	11960690255	2500	4	TGAC_1233	252500	20.1485	18.3861	20.4024	22.5358	19.1438	19.1402	19.0749
DNA-Genome-Picea-abies-GCA_900067695.1-2016-11-09.one_line	11960690255	2500	4	CTAG_1234	52500	19.6895	20.4533	20.2895	22.7067	21.5638	21.0629	21.2495
DNA-Genome-Picea-abies-GCA_900067695.1-2016-11-09.one_line	11960690255	2500	4	GATC_1234	40000	19.715	20.3825	20.355	22.7025	21.43	20.88	21.17
DNA-Genome-Picea-abies-GCA_900067695.1-2016-11-09.one_line	11960690255	2500	4	TCGA_1234	32500	22.7692	22.1262	23.2369	25.3508	22.8892	22.1446	22.8554
DNA-Genome-Picea-abies-GCA_900067695.1-2016-11-09.one_line	11960690255	2500	4	AGCT_1234	22500	23.3156	22.7156	23.8933	26.0311	24.2889	23.6178	24.0889
DNA-Genome-Picea-abies-GCA_900067695.1-2016-11-09.one_line	11960690255	2500	4	TGAC_1234	12500	22.072	22.96	22.944	24.768	25.352	24.224	24.672
DNA-Genome-Picea-abies-GCA_900067695.1-2016-11-09.one_line	11960690255	2500	4	ACTG_1234	12500	18.088	18.52	18.544	20.528	21.504	20.512	20.928
DNA-Genome-Picea-abies-GCA_900067695.1-2016-11-09.one_line	11960690255	2500	4	GTAC_1233	7500	19.9733	21.6267	20.7733	22.8533	24.4667	23.08	23.52
DNA-Genome-Picea-abies-GCA_900067695.1-2016-11-09.one_line	11960690255	5000	4	ACTG_2222	9594635255	23.6895	19.905	23.665	26.8881	17.8383	20.7925	20.8259
DNA-Genome-Picea-abies-GCA_900067695.1-2016-11-09.one_line	11960690255	5000	4	TACG_1233	754230000	23.266	21.3531	23.4976	26.5512	20.0517	22.0906	22.1151
DNA-Genome-Picea-abies-GCA_900067695.1-2016-11-09.one_line	11960690255	5000	4	ATCG_1233	744365000	23.2758	21.3707	23.5092	26.5389	20.0819	22.1297	22.1441
DNA-Genome-Picea-abies-GCA_900067695.1-2016-11-09.one_line	11960690255	5000	4	ACTG_2223	376885000	23.4884	20.8206	23.407	26.8641	17.7718	20.397	20.4096
DNA-Genome-Picea-abies-GCA_900067695.1-2016-11-09.one_line	11960690255	5000	4	ATGC_2223	362770000	23.5567	21.0364	23.4837	26.8649	17.9416	20.554	20.5741
DNA-Genome-Picea-abies-GCA_900067695.1-2016-11-09.one_line	11960690255	5000	4	ATGC_1234	38220000	22.8015	21.7187	22.9153	26.3479	20.2497	21.0018	20.9723
DNA-Genome-Picea-abies-GCA_900067695.1-2016-11-09.one_line	11960690255	5000	4	TACG_1234	38105000	22.8066	21.7409	22.9297	26.3807	20.2503	20.9914	20.9628
DNA-Genome-Picea-abies-GCA_900067695.1-2016-11-09.one_line	11960690255	5000	4	ATCG_1234	23815000	23.2515	23.1404	23.4339	26.5389	21.9286	22.3141	22.3323
DNA-Genome-Picea-abies-GCA_900067695.1-2016-11-09.one_line	11960690255	5000	4	TAGC_1234	23395000	23.2651	23.2814	23.4519	26.5199	22.0061	22.3901	22.4019
DNA-Genome-Picea-abies-GCA_900067695.1-2016-11-09.one_line	11960690255	5000	4	TCAG_1233	1535000	21.2117	18.8742	21.4215	24.1693	18.6205	18.5801	18.6504
DNA-Genome-Picea-abies-GCA_900067695.1-2016-11-09.one_line	11960690255	5000	4	AGCT_1233	1345000	21.3513	18.9713	21.537	24.2506	18.8618	18.8101	18.8208
DNA-Genome-Picea-abies-GCA_900067695.1-2016-11-09.one_line	11960690255	5000	4	ACGT_2223	410000	20.7695	18.7824	20.9176	22.759	17.9427	17.9973	17.9093
DNA-Genome-Picea-abies-GCA_900067695.1-2016-11-09.one_line	11960690255	5000	4	CTGA_2223	405000	21.2642	19.14	21.4222	23.2296	18.3277	18.2948	18.2667
DNA-Genome-Picea-abies-GCA_900067695.1-2016-11-09.one_line	11960690255	5000	4	AGTC_1234	170000	22.2388	23.2359	22.5165	24.9853	22.9418	22.9818	22.9976
DNA-Genome-Picea-abies-GCA_900067695.1-2016-11-09.one_line	11960690255	5000	4	TCAG_1234	155000	22.1877	23.0503	22.6219	24.9897	22.8265	22.531	22.6839
DNA-Genome-Picea-abies-GCA_900067695.1-2016-11-09.one_line	11960690255	5000	4	CTAG_1233	95000	14.4484	14.5747	14.8379	17.0842	15.4463	15.1537	15.2674
DNA-Genome-Picea-abies-GCA_900067695.1-2016-11-09.one_line	11960690255	5000	4	ACTG_1233	45000	20.0178	18.6311	20.3111	22.48	20.44	20.0622	20.1778
DNA-Genome-Picea-abies-GCA_900067695.1-2016-11-09.one_line	11960690255	5000	4	GACT_1233	45000	18.0044	17.9533	18.3956	20.68	20.0956	19.6222	19.7956
DNA-Genome-Picea-abies-GCA_900067695.1-2016-11-09.one_line	11960690255	5000	4	TGAC_1233	35000	21.1229	20.14	21.5029	23.7229	22.18	21.7143	21.9886
DNA-Genome-Picea-abies-GCA_900067695.1-2016-11-09.one_line	11960690255	5000	4	GATC_1234	10000	20.36	19.69	21.3	23.45	23.13	21.59	22.4
DNA-Genome-Picea-abies-GCA_900067695.1-2016-11-09.one_line	11960690255	5000	4	TGAC_1234	5000	21.86	22.32	22.96	24.58	27.66	25.44	26.16
DNA-Genome-Picea-abies-GCA_900067695.1-2016-11-09.one_line	11960690255	5000	4	CTAG_1234	5000	22.6	22.76	24.04	26.28	29.46	27.52	27.92
DNA-Genome-Picea-abies-GCA_900067695.1-2016-11-09.one_line	11960690255	5000	4	AGCT_1234	5000	20.82	21.98	22.04	23.82	27.2	25.32	25.76
DNA-Genome-Picea-abies-GCA_900067695.1-2016-11-09.one_line	11960690255	5000	4	TCGA_1234	5000	19.24	19.82	20.44	22.12	25.04	22.58	23.52
DNA-Genome-Picea-abies-GCA_900067695.1-2016-11-09.one_line	11960690255	10000	4	ACTG_2222	9691420255	23.6812	20.0204	23.6754	26.8754	17.985	20.9091	20.9424
DNA-Genome-Picea-abies-GCA_900067695.1-2016-11-09.one_line	11960690255	10000	4	ACTG_2223	672510000	23.5986	21.1887	23.5817	26.8542	18.0282	20.7159	20.7427
DNA-Genome-Picea-abies-GCA_900067695.1-2016-11-09.one_line	11960690255	10000	4	ATGC_2223	645400000	23.6426	21.3431	23.6337	26.8461	18.1559	20.8287	20.8592
DNA-Genome-Picea-abies-GCA_900067695.1-2016-11-09.one_line	11960690255	10000	4	TACG_1233	413540000	23.3435	21.5799	23.5985	26.5694	20.4041	22.3335	22.3508
DNA-Genome-Picea-abies-GCA_900067695.1-2016-11-09.one_line	11960690255	10000	4	ATCG_1233	407880000	23.3501	21.5922	23.6039	26.5596	20.4262	22.3301	22.3583
DNA-Genome-Picea-abies-GCA_900067695.1-2016-11-09.one_line	11960690255	10000	4	TACG_1234	41180000	23.1248	22.3533	23.2938	26.4938	20.7736	21.5353	21.5569
DNA-Genome-Picea-abies-GCA_900067695.1-2016-11-09.one_line	11960690255	10000	4	ATGC_1234	40790000	23.1276	22.3328	23.2886	26.4673	20.7975	21.566	21.5741
DNA-Genome-Picea-abies-GCA_900067695.1-2016-11-09.one_line	11960690255	10000	4	ATCG_1234	24010000	23.3516	23.3679	23.5742	26.5323	22.1111	22.4707	22.4936
DNA-Genome-Picea-abies-GCA_900067695.1-2016-11-09.one_line	11960690255	10000	4	TAGC_1234	23320000	23.3461	23.4664	23.5668	26.5179	22.1857	22.5509	22.5582
DNA-Genome-Picea-abies-GCA_900067695.1-2016-11-09.one_line	11960690255	10000	4	TCAG_1233	170000	19.3065	16.9541	19.5447	21.5171	17.9324	17.7329	17.8306
DNA-Genome-Picea-abies-GCA_900067695.1-2016-11-09.one_line	11960690255	10000	4	ACGT_2223	160000	19.2481	18.3294	19.4238	21.1381	18.4681	18.5475	18.35
DNA-Genome-Picea-abies-GCA_900067695.1-2016-11-09.one_line	11960690255	10000	4	AGCT_1233	140000	18.7736	17.3579	19.0557	21.2364	18.235	17.8807	18.1571
DNA-Genome-Picea-abies-GCA_900067695.1-2016-11-09.one_line	11960690255	10000	4	CTGA_2223	80000	22.7238	23.0175	23.0425	24.995	23.44	23.4225	23.35
DNA-Genome-Picea-abies-GCA_900067695.1-2016-11-09.one_line	11960690255	10000	4	TCAG_1234	50000	21.488	21.9	21.984	24.234	22.87	22.674	22.68
DNA-Genome-Picea-abies-GCA_900067695.1-2016-11-09.one_line	11960690255	10000	4	AGTC_1234	40000	19.6725	19.26	20.125	22.04	19.3175	18.8825	19.12
DNA-Genome-Picea-abies-GCA_900067695.1-2016-11-09.one_line	11960690255	25	5	ACTG_2222	4142321755	24.0685	22.7756	24.0551	26.9354	21.9719	23.7219	23.7602
DNA-Genome-Picea-abies-GCA_900067695.1-2016-11-09.one_line	11960690255	25	5	TACG_1233	2058488775	22.3849	22.0774	22.7704	26.0144	22.184	23.2355	23.2608
DNA-Genome-Picea-abies-GCA_900067695.1-2016-11-09.one_line	11960690255	25	5	ATCG_1233	1686037400	22.3217	22.0833	22.7195	25.973	22.2873	23.2728	23.293
DNA-Genome-Picea-abies-GCA_900067695.1-2016-11-09.one_line	11960690255	25	5	TCAG_1233	753355650	22.0111	21.6943	22.2712	25.9083	21.5218	22.7131	22.7593
DNA-Genome-Picea-abies-GCA_900067695.1-2016-11-09.one_line	11960690255	25	5	ACTG_1233	731709050	22.0979	21.9064	22.3773	25.9331	21.8787	22.9582	23.0013
DNA-Genome-Picea-abies-GCA_900067695.1-2016-11-09.one_line	11960690255	25	5	AGCT_1233	613317700	21.9687	21.7458	22.2724	25.8073	21.6667	22.7771	22.8212
DNA-Genome-Picea-abies-GCA_900067695.1-2016-11-09.one_line	11960690255	25	5	TGAC_1233	514148100	21.97	21.8377	22.2343	25.7747	21.852	22.8808	22.9271
DNA-Genome-Picea-abies-GCA_900067695.1-2016-11-09.one_line	11960690255	25	5	GACT_1233	270103225	21.8265	21.7835	22.0156	25.7956	21.3991	22.5117	22.5746
DNA-Genome-Picea-abies-GCA_900067695.1-2016-11-09.one_line	11960690255	25	5	CATG_1233	238071925	21.7511	21.7029	21.884	25.7923	21.3355	22.4183	22.4838
DNA-Genome-Picea-abies-GCA_900067695.1-2016-11-09.one_line	11960690255	25	5	CTAG_1233	221613425	21.626	21.5528	21.7714	25.6912	21.2305	22.3291	22.3995
DNA-Genome-Picea-abies-GCA_900067695.1-2016-11-09.one_line	11960690255	25	5	GTAC_1233	188729975	21.7649	21.7892	21.9241	25.7801	21.4875	22.4876	22.5497
DNA-Genome-Picea-abies-GCA_900067695.1-2016-11-09.one_line	11960690255	25	5	ACT_122	106206725	18.1819	18.3802	18.3734	21.8796	18.7782	19.2378	19.2307
DNA-Genome-Picea-abies-GCA_900067695.1-2016-11-09.one_line	11960690255	25	5	ATG_122	103944250	18.2725	18.4623	18.4548	21.9414	18.9088	19.3236	19.3307
DNA-Genome-Picea-abies-GCA_900067695.1-2016-11-09.one_line	11960690255	25	5	TAC_122	92134600	18.1267	18.3115	18.324	21.8163	18.7895	19.1897	19.1929
DNA-Genome-Picea-abies-GCA_900067695.1-2016-11-09.one_line	11960690255	25	5	TAG_122	91404925	18.1134	18.299	18.3256	21.8074	18.7671	19.1816	19.1805
DNA-Genome-Picea-abies-GCA_900067695.1-2016-11-09.one_line	11960690255	25	5	CAT_122	35170300	17.878	18.1608	17.9508	21.7573	18.5314	18.7642	18.7757
DNA-Genome-Picea-abies-GCA_900067695.1-2016-11-09.one_line	11960690255	25	5	GAT_122	26256000	17.9266	18.1831	17.8945	21.7282	18.6751	18.8249	18.8468
DNA-Genome-Picea-abies-GCA_900067695.1-2016-11-09.one_line	11960690255	25	5	GCAT_1233	26038800	20.5454	20.5375	20.3301	24.8455	20.8666	21.0874	21.1727
DNA-Genome-Picea-abies-GCA_900067695.1-2016-11-09.one_line	11960690255	25	5	CGAT_1233	21750500	20.4113	20.4205	20.2437	24.6962	20.7974	20.9393	21.0241
DNA-Genome-Picea-abies-GCA_900067695.1-2016-11-09.one_line	11960690255	25	5	AT_11	12350250	9.5587	10.422	9.6548	12.5393	10.9814	11.5833	10.9855
DNA-Genome-Picea-abies-GCA_900067695.1-2016-11-09.one_line	11960690255	25	5	ACG_122	6726225	16.5182	17.1444	16.7981	20.4138	17.695	17.6619	17.6952
DNA-Genome-Picea-abies-GCA_900067695.1-2016-11-09.one_line	11960690255	25	5	TCG_122	6614850	16.4969	17.122	16.7889	20.449	17.6629	17.6177	17.6614
DNA-Genome-Picea-abies-GCA_900067695.1-2016-11-09.one_line	11960690255	25	5	CTG_122	1451050	16.4801	17.4979	16.765	19.817	17.7731	17.7269	17.775
DNA-Genome-Picea-abies-GCA_900067695.1-2016-11-09.one_line	11960690255	25	5	CT_11	1254975	8.2009	9.6649	8.3273	10.6156	9.8116	10.4436	9.8316
DNA-Genome-Picea-abies-GCA_900067695.1-2016-11-09.one_line	11960690255	25	5	AG_11	1048650	8.2539	9.6975	8.387	10.6405	9.8986	10.5016	9.9362
DNA-Genome-Picea-abies-GCA_900067695.1-2016-11-09.one_line	11960690255	25	5	ATGCN_22233	1012825	25.3861	27.3567	26.0566	28.7289	27.5193	27.5932	27.5278
DNA-Genome-Picea-abies-GCA_900067695.1-2016-11-09.one_line	11960690255	25	5	GAC_122	923675	16.6648	17.5605	16.9705	19.7096	17.9968	17.9842	17.9812
DNA-Genome-Picea-abies-GCA_900067695.1-2016-11-09.one_line	11960690255	25	5	ATNCG_22233	850025	21.4737	25.4268	22.1408	25.0954	24.4132	24.4399	24.4087
DNA-Genome-Picea-abies-GCA_900067695.1-2016-11-09.one_line	11960690255	25	5	ACTGN_22233	826950	25.229	27.1785	25.9397	28.6171	27.4099	27.439	27.4101
DNA-Genome-Picea-abies-GCA_900067695.1-2016-11-09.one_line	11960690255	25	5	CAG_122	535925	16.2724	16.8496	16.5045	18.9088	17.5515	17.5101	17.5196
DNA-Genome-Picea-abies-GCA_900067695.1-2016-11-09.one_line	11960690255	25	5	GCT_122	473975	16.2994	16.8794	16.5481	18.9508	17.6073	17.5613	17.5992
DNA-Genome-Picea-abies-GCA_900067695.1-2016-11-09.one_line	11960690255	25	5	CTNAG_22233	376025	21.3297	25.2547	22.0858	24.9191	24.6204	24.6034	24.6016
DNA-Genome-Picea-abies-GCA_900067695.1-2016-11-09.one_line	11960690255	25	5	AC_11	364875	4.5215	5.8124	4.6536	5.9977	6.4099	6.8933	6.3847
DNA-Genome-Picea-abies-GCA_900067695.1-2016-11-09.one_line	11960690255	25	5	AGNCT_22233	361825	21.3548	25.3233	22.0996	24.8678	24.6102	24.592	24.582
DNA-Genome-Picea-abies-GCA_900067695.1-2016-11-09.one_line	11960690255	25	5	TG_11	356475	4.5829	5.8517	4.7195	6.0843	6.507	6.934	6.4756
DNA-Genome-Picea-abies-GCA_900067695.1-2016-11-09.one_line	11960690255	25	5	CTGAN_22233	342900	25.6769	27.6028	26.4637	28.8475	28.1487	28.2021	28.1085
DNA-Genome-Picea-abies-GCA_900067695.1-2016-11-09.one_line	11960690255	25	5	TGNAC_22233	337850	21.2793	25.2079	22.0465	24.7811	24.5961	24.6086	24.573
DNA-Genome-Picea-abies-GCA_900067695.1-2016-11-09.one_line	11960690255	25	5	ACGTN_22233	289600	25.7189	27.5805	26.5021	28.8947	28.1948	28.3032	28.1809
DNA-Genome-Picea-abies-GCA_900067695.1-2016-11-09.one_line	11960690255	25	5	ACNTG_22233	279575	21.5005	25.5473	22.3067	25.1725	24.7873	24.7737	24.7533
DNA-Genome-Picea-abies-GCA_900067695.1-2016-11-09.one_line	11960690255	25	5	ACTGN_13333	183000	23.224	25.9978	24.0929	27.1814	26.1344	26.1869	26.1071
DNA-Genome-Picea-abies-GCA_900067695.1-2016-11-09.one_line	11960690255	25	5	TACGN_13333	181550	23.1226	25.9521	23.9857	27.1688	26.0463	26.0193	25.9719
DNA-Genome-Picea-abies-GCA_900067695.1-2016-11-09.one_line	11960690255	25	5	ATGCN_12344	174350	24.1285	25.0995	25.0852	27.9696	27.1247	27.1047	27.0926
DNA-Genome-Picea-abies-GCA_900067695.1-2016-11-09.one_line	11960690255	25	5	TAGCN_12344	158200	24.0569	24.9905	25.0544	28.0765	27.1909	27.1327	27.1226
DNA-Genome-Picea-abies-GCA_900067695.1-2016-11-09.one_line	11960690255	25	5	TACGN_12344	122100	24.0966	25.0287	25.1319	28.041	27.2531	27.2441	27.1974
DNA-Genome-Picea-abies-GCA_900067695.1-2016-11-09.one_line	11960690255	25	5	ATCGN_12344	119825	24.0876	25.0849	25.1266	28.1344	27.3173	27.2689	27.2431
DNA-Genome-Picea-abies-GCA_900067695.1-2016-11-09.one_line	11960690255	25	5	ATGN_2222	96100	19.0968	23.4277	19.7253	22.7263	22.2872	22.307	22.2227
DNA-Genome-Picea-abies-GCA_900067695.1-2016-11-09.one_line	11960690255	25	5	ACTN_2222	94250	19.0822	23.3337	19.6944	22.661	22.3862	22.366	22.2599
DNA-Genome-Picea-abies-GCA_900067695.1-2016-11-09.one_line	11960690255	25	5	AGTCN_12344	82175	24.1789	25.1366	25.2875	28.0961	27.7676	27.6447	27.7213
DNA-Genome-Picea-abies-GCA_900067695.1-2016-11-09.one_line	11960690255	25	5	ACTGN_12344	80350	24.0075	24.9956	25.0629	27.8531	27.374	27.3479	27.3006
DNA-Genome-Picea-abies-GCA_900067695.1-2016-11-09.one_line	11960690255	25	5	CGNAT_22233	79425	21.628	25.7891	22.4992	24.9632	25.8735	25.8319	25.8004
DNA-Genome-Picea-abies-GCA_900067695.1-2016-11-09.one_line	11960690255	25	5	ATNCG_12344	78675	21.5545	24.8719	22.6298	26.0947	24.938	24.8249	24.816
DNA-Genome-Picea-abies-GCA_900067695.1-2016-11-09.one_line	11960690255	25	5	TANCG_12344	71250	21.4779	24.9782	22.5937	26.0674	24.9067	24.8351	24.7804
DNA-Genome-Picea-abies-GCA_900067695.1-2016-11-09.one_line	11960690255	25	5	TCAGN_12344	64500	24.0667	25.0434	25.1938	28.138	27.8233	27.6481	27.7519
DNA-Genome-Picea-abies-GCA_900067695.1-2016-11-09.one_line	11960690255	25	5	TGACN_12344	60200	23.9917	25.0482	25.113	27.8754	27.8289	27.6362	27.6346
DNA-Genome-Picea-abies-GCA_900067695.1-2016-11-09.one_line	11960690255	25	5	NACTG_13333	51100	17.865	21.5871	18.544	19.7084	22.8219	22.4755	22.6771
DNA-Genome-Picea-abies-GCA_900067695.1-2016-11-09.one_line	11960690255	25	5	TCGAN_12344	46725	24.2932	25.1514	25.5281	28.4002	28.2996	28.1562	28.1648
DNA-Genome-Picea-abies-GCA_900067695.1-2016-11-09.one_line	11960690255	25	5	ANTCG_12344	44225	18.4986	22.8016	19.5862	22.4104	22.9079	22.7586	22.7564
DNA-Genome-Picea-abies-GCA_900067695.1-2016-11-09.one_line	11960690255	25	5	ACGTN_12344	38950	24.3877	25.2965	25.5815	28.3594	28.5597	28.38	28.3646
DNA-Genome-Picea-abies-GCA_900067695.1-2016-11-09.one_line	11960690255	25	5	NATCG_12344	38650	16.8823	20.088	17.8163	19.7076	21.8991	21.6093	21.7128
DNA-Genome-Picea-abies-GCA_900067695.1-2016-11-09.one_line	11960690255	25	5	TAGN_1233	38075	20.0315	22.3375	20.8903	24.2049	23.8713	23.6559	23.6796
DNA-Genome-Picea-abies-GCA_900067695.1-2016-11-09.one_line	11960690255	25	5	TNACG_12344	36800	18.5598	22.8967	19.6739	22.4701	23.1576	22.8995	22.9783
DNA-Genome-Picea-abies-GCA_900067695.1-2016-11-09.one_line	11960690255	25	5	TACN_1233	36525	20.167	22.3518	21.076	24.4627	24.0082	23.7235	23.7755
DNA-Genome-Picea-abies-GCA_900067695.1-2016-11-09.one_line	11960690255	25	5	ATN_122	36175	7.3531	9.3766	7.718	9.8521	11.9724	10.1949	9.4762
DNA-Genome-Picea-abies-GCA_900067695.1-2016-11-09.one_line	11960690255	25	5	GATCN_12344	34975	24.3374	25.2695	25.5668	28.2916	28.6719	28.426	28.4203
DNA-Genome-Picea-abies-GCA_900067695.1-2016-11-09.one_line	11960690255	25	5	TGCAN_12344	33700	24.4718	25.3175	25.7982	28.5134	28.7567	28.5668	28.5697
DNA-Genome-Picea-abies-GCA_900067695.1-2016-11-09.one_line	11960690255	25	5	ANGCT_12344	33650	18.5498	22.6657	19.679	22.4101	23.2303	23.0163	23.049
DNA-Genome-Picea-abies-GCA_900067695.1-2016-11-09.one_line	11960690255	25	5	CTAGN_12344	33450	24.3797	25.2646	25.6861	28.4036	28.6457	28.3827	28.4245
DNA-Genome-Picea-abies-GCA_900067695.1-2016-11-09.one_line	11960690255	25	5	ATCN_1233	31200	19.9968	22.3782	20.9167	24.2949	23.9936	23.6955	23.7692
DNA-Genome-Picea-abies-GCA_900067695.1-2016-11-09.one_line	11960690255	25	5	TNCAG_12344	30700	18.5114	23.0326	19.6873	22.5537	23.2964	23.0945	23.0489
DNA-Genome-Picea-abies-GCA_900067695.1-2016-11-09.one_line	11960690255	25	5	ATGN_1233	30050	20.1897	22.3627	21.0316	24.5092	24.1697	23.8735	23.8935
DNA-Genome-Picea-abies-GCA_900067695.1-2016-11-09.one_line	11960690255	25	5	NTACG_12344	29000	16.9931	20.3414	18.0069	19.9241	22.3207	21.8759	22.0552
DNA-Genome-Picea-abies-GCA_900067695.1-2016-11-09.one_line	11960690255	25	5	TNGAC_12344	28875	18.6736	22.4	19.8511	22.6632	23.5325	23.2277	23.2727
DNA-Genome-Picea-abies-GCA_900067695.1-2016-11-09.one_line	11960690255	25	5	AGNCT_12344	26625	21.615	25.0629	23.031	26.231	26.1258	25.7427	25.8103
DNA-Genome-Picea-abies-GCA_900067695.1-2016-11-09.one_line	11960690255	25	5	CATGN_12344	26475	24.5401	25.5109	25.8659	28.5212	29.1256	28.7781	28.8574
DNA-Genome-Picea-abies-GCA_900067695.1-2016-11-09.one_line	11960690255	25	5	AGCTN_12344	26375	24.4209	25.2929	25.8199	28.6028	29.1033	28.7128	28.8455
DNA-Genome-Picea-abies-GCA_900067695.1-2016-11-09.one_line	11960690255	25	5	TCNAG_12344	26350	21.5863	25.1651	22.945	26.1822	26.0152	25.5446	25.7457
DNA-Genome-Picea-abies-GCA_900067695.1-2016-11-09.one_line	11960690255	25	5	NAGCT_12344	25700	17.1167	20.537	18.2101	19.9416	22.5798	22.2257	22.3191
DNA-Genome-Picea-abies-GCA_900067695.1-2016-11-09.one_line	11960690255	25	5	NTCAG_12344	22875	17.1497	20.4328	18.282	19.9694	22.6317	22.2689	22.3301
DNA-Genome-Picea-abies-GCA_900067695.1-2016-11-09.one_line	11960690255	25	5	TCAN_1233	22625	20.2431	22.6564	21.1624	24.4597	24.5171	24.2166	24.221
DNA-Genome-Picea-abies-GCA_900067695.1-2016-11-09.one_line	11960690255	25	5	NTGAC_12344	22275	17.1852	20.5657	18.3075	20.009	22.963	22.4242	22.6442
DNA-Genome-Picea-abies-GCA_900067695.1-2016-11-09.one_line	11960690255	25	5	GTACN_12344	22000	24.5909	25.3773	26.0545	28.6409	29.4273	29.0136	29.1091
DNA-Genome-Picea-abies-GCA_900067695.1-2016-11-09.one_line	11960690255	25	5	ACNTG_12344	20675	21.6832	25.0979	23.081	25.9927	26.162	25.7993	25.8283
DNA-Genome-Picea-abies-GCA_900067695.1-2016-11-09.one_line	11960690255	25	5	TGNAC_12344	20075	21.7484	25.4097	23.213	25.9577	26.4857	26.0025	26.1021
DNA-Genome-Picea-abies-GCA_900067695.1-2016-11-09.one_line	11960690255	25	5	TAN_122	19375	8.449	10.9832	8.96	11.1071	13.5381	11.6439	11.4787
DNA-Genome-Picea-abies-GCA_900067695.1-2016-11-09.one_line	11960690255	25	5	ANCTG_12344	18975	18.7352	22.4242	19.9947	22.7404	24.0685	23.5679	23.6733
DNA-Genome-Picea-abies-GCA_900067695.1-2016-11-09.one_line	11960690255	25	5	CATGN_13333	18500	23.3568	26.0649	24.6595	27.2811	28.5676	28.0919	28.1946
DNA-Genome-Picea-abies-GCA_900067695.1-2016-11-09.one_line	11960690255	25	5	ACTN_1233	18375	20.6204	22.8245	21.5728	24.7673	25.1537	24.5932	24.7946
DNA-Genome-Picea-abies-GCA_900067695.1-2016-11-09.one_line	11960690255	25	5	GACTN_13333	18350	23.1553	25.7384	24.4469	27.1172	28.2016	27.6458	27.8365
DNA-Genome-Picea-abies-GCA_900067695.1-2016-11-09.one_line	11960690255	25	5	AGTN_1233	17725	20.4852	22.6855	21.4838	24.8463	25.0945	24.598	24.6883
DNA-Genome-Picea-abies-GCA_900067695.1-2016-11-09.one_line	11960690255	25	5	CTGAN_12344	17125	24.8117	25.5825	26.3124	28.7066	30.1197	29.5358	29.7343
DNA-Genome-Picea-abies-GCA_900067695.1-2016-11-09.one_line	11960690255	25	5	NACTG_12344	15750	17.1429	20.4254	18.3111	19.9238	23.3016	22.5968	22.8317
DNA-Genome-Picea-abies-GCA_900067695.1-2016-11-09.one_line	11960690255	25	5	TGAN_1233	14350	20.6829	22.7875	21.6585	24.878	25.5261	24.9268	25.0314
DNA-Genome-Picea-abies-GCA_900067695.1-2016-11-09.one_line	11960690255	25	5	ANTG_1233	14350	16.446	20.5296	17.2962	20.0139	21.9164	21.2683	21.4077
DNA-Genome-Picea-abies-GCA_900067695.1-2016-11-09.one_line	11960690255	25	5	TNAG_1233	14300	16.1259	20.0839	16.9231	19.8322	21.4056	20.8112	20.9231
DNA-Genome-Picea-abies-GCA_900067695.1-2016-11-09.one_line	11960690255	25	5	TNAC_1233	13675	16.5484	20.4607	17.4186	20.3071	21.989	21.2797	21.4698
DNA-Genome-Picea-abies-GCA_900067695.1-2016-11-09.one_line	11960690255	25	5	ANCT_1233	13475	16.3785	20.0594	17.1874	20.0445	21.6772	21.039	21.1651
DNA-Genome-Picea-abies-GCA_900067695.1-2016-11-09.one_line	11960690255	25	5	GATN_1233	13175	20.9108	22.9753	21.9203	25.3662	26.1784	25.4801	25.6546
DNA-Genome-Picea-abies-GCA_900067695.1-2016-11-09.one_line	11960690255	25	5	NATG_1233	12500	15.464	19.128	16.208	18.272	21.576	20.84	21.088
DNA-Genome-Picea-abies-GCA_900067695.1-2016-11-09.one_line	11960690255	25	5	NACT_1233	11975	15.3904	18.9729	16.1503	18.1545	21.3361	20.6848	20.7432
DNA-Genome-Picea-abies-GCA_900067695.1-2016-11-09.one_line	11960690255	25	5	NTAG_1233	11775	15.3461	19.1083	16.051	18.1571	21.4183	20.7219	20.8238
DNA-Genome-Picea-abies-GCA_900067695.1-2016-11-09.one_line	11960690255	25	5	NTAC_1233	11500	15.3739	19.0087	16.1043	18.2435	21.4696	20.6348	20.8696
DNA-Genome-Picea-abies-GCA_900067695.1-2016-11-09.one_line	11960690255	25	5	CTAN_1233	11225	20.9265	22.5835	21.9866	25.5145	26.3786	25.7728	25.7639
DNA-Genome-Picea-abies-GCA_900067695.1-2016-11-09.one_line	11960690255	25	5	CAGTN_12344	10800	24.9537	25.3056	26.5926	28.9815	30.7778	30.0556	30.1111
DNA-Genome-Picea-abies-GCA_900067695.1-2016-11-09.one_line	11960690255	25	5	CTNAG_12344	10100	22.396	25.495	24.1188	27.1386	28.4158	27.5644	27.7228
DNA-Genome-Picea-abies-GCA_900067695.1-2016-11-09.one_line	11960690255	25	5	CATN_1233	9925	21.3602	23.1436	22.4484	25.6322	26.9219	26.0756	26.1965
DNA-Genome-Picea-abies-GCA_900067695.1-2016-11-09.one_line	11960690255	25	5	GTCAN_12344	9525	25.1864	25.5958	26.8976	29.1549	31.5696	30.7192	30.8241
DNA-Genome-Picea-abies-GCA_900067695.1-2016-11-09.one_line	11960690255	25	5	GANCT_12344	8950	22.2346	25.3631	23.9777	26.9721	28.4693	27.5642	27.7095
DNA-Genome-Picea-abies-GCA_900067695.1-2016-11-09.one_line	11960690255	25	5	GACTN_12344	8900	25.1573	25.5843	26.9888	29.191	31.5843	30.7079	30.7865
DNA-Genome-Picea-abies-GCA_900067695.1-2016-11-09.one_line	11960690255	25	5	NGTAC_12344	8600	18	21.3488	19.4419	20.8721	25.2907	24.3721	24.4651
DNA-Genome-Picea-abies-GCA_900067695.1-2016-11-09.one_line	11960690255	25	5	GTAN_1233	8450	21.5503	23.3018	22.6746	25.7515	27.5266	26.497	26.6982
DNA-Genome-Picea-abies-GCA_900067695.1-2016-11-09.one_line	11960690255	25	5	NCTAG_12344	8225	17.8602	21.0699	19.2584	20.3769	25.2523	24.2553	24.4134
DNA-Genome-Picea-abies-GCA_900067695.1-2016-11-09.one_line	11960690255	25	5	CTN_122	6700	9.3731	11.3881	10.2985	12.6567	15.4776	12.5224	12.8955
DNA-Genome-Picea-abies-GCA_900067695.1-2016-11-09.one_line	11960690255	25	5	NCATG_12344	6025	18.1577	21.2946	19.7842	20.9295	26.556	25.0456	25.361
DNA-Genome-Picea-abies-GCA_900067695.1-2016-11-09.one_line	11960690255	25	5	GTNAC_12344	5975	22.9121	25.9079	24.9372	27.7657	30.3933	28.8368	29.1883
DNA-Genome-Picea-abies-GCA_900067695.1-2016-11-09.one_line	11960690255	25	5	NGACT_12344	5900	18.0678	21.2881	19.6949	20.7458	26.5932	24.9661	25.4237
DNA-Genome-Picea-abies-GCA_900067695.1-2016-11-09.one_line	11960690255	25	5	AGN_122	5600	9.3036	11.75	10.3929	12.7679	16.875	12.9464	13.3571
DNA-Genome-Picea-abies-GCA_900067695.1-2016-11-09.one_line	11960690255	25	5	CNTAG_12344	5575	19.3004	22.296	20.843	23.2108	26.8341	25.0404	25.6143
DNA-Genome-Picea-abies-GCA_900067695.1-2016-11-09.one_line	11960690255	25	5	CNAT_1233	5550	16.2523	19.6396	17.2252	20.0901	23.6036	21.7838	22.3423
DNA-Genome-Picea-abies-GCA_900067695.1-2016-11-09.one_line	11960690255	25	5	CANTG_12344	5475	23.3425	26.0274	25.3516	27.9269	31.3607	29.589	30.1005
DNA-Genome-Picea-abies-GCA_900067695.1-2016-11-09.one_line	11960690255	25	5	GNAT_1233	5425	16.4977	20.2212	17.5484	20.1843	24.2765	22.4147	23.0046
DNA-Genome-Picea-abies-GCA_900067695.1-2016-11-09.one_line	11960690255	25	5	NCAT_1233	5325	16.3192	19.8873	17.1643	19.23	24.4131	22.5915	23.061
DNA-Genome-Picea-abies-GCA_900067695.1-2016-11-09.one_line	11960690255	25	5	NAT_122	5000	7.46	9.32	8.32	9.3	15.72	10.76	11.04
DNA-Genome-Picea-abies-GCA_900067695.1-2016-11-09.one_line	11960690255	25	5	NGAT_1233	4950	16.5455	20.1212	17.3737	19.4747	24.9697	22.8889	23.5152
DNA-Genome-Picea-abies-GCA_900067695.1-2016-11-09.one_line	11960690255	25	5	GNTAC_12344	4500	19.5778	22.6889	21.3778	23.3778	28.2889	26.0444	26.7556
DNA-Genome-Picea-abies-GCA_900067695.1-2016-11-09.one_line	11960690255	25	5	ACN_122	4425	10.0565	12.6328	11.3898	13.4689	18.8475	13.7175	14.2825
DNA-Genome-Picea-abies-GCA_900067695.1-2016-11-09.one_line	11960690255	25	5	ANCG_1233	4350	16.8736	21.1034	18.2069	21.4253	25.0575	22.6667	23.4483
DNA-Genome-Picea-abies-GCA_900067695.1-2016-11-09.one_line	11960690255	25	5	ACGN_2222	4225	19.9053	24.426	21.3018	24.1893	28.5207	26.0828	26.8876
DNA-Genome-Picea-abies-GCA_900067695.1-2016-11-09.one_line	11960690255	25	5	TCN_122	4150	12.0482	14.988	13.3012	16.241	19.6627	16.1928	17.0602
DNA-Genome-Picea-abies-GCA_900067695.1-2016-11-09.one_line	11960690255	25	5	TCGN_1233	4075	20.9325	22.4294	22.2822	26.0613	29.2025	26.6503	27.4847
DNA-Genome-Picea-abies-GCA_900067695.1-2016-11-09.one_line	11960690255	25	5	CTGN_2222	4000	20.25	25.075	21.4	24.05	29.05	26.475	27.3
DNA-Genome-Picea-abies-GCA_900067695.1-2016-11-09.one_line	11960690255	25	5	GAN_122	3900	10.9744	13.7692	12.359	14.6923	17.8718	14.6667	15.6923
DNA-Genome-Picea-abies-GCA_900067695.1-2016-11-09.one_line	11960690255	25	5	TGN_122	3750	10.8	13.1733	12.0533	14.48	19.0133	14.72	15.5733
DNA-Genome-Picea-abies-GCA_900067695.1-2016-11-09.one_line	11960690255	25	5	TNCG_1233	3725	17.396	21.2617	18.5235	21.9597	26.0134	23.2752	24.1611
DNA-Genome-Picea-abies-GCA_900067695.1-2016-11-09.one_line	11960690255	25	5	GNACT_12344	3700	19.8378	22.9189	21.6216	23.6757	29.2432	26.3243	27.3514
DNA-Genome-Picea-abies-GCA_900067695.1-2016-11-09.one_line	11960690255	25	5	GCTAN_12344	3625	26.6759	26.3448	28.8552	30.6207	36.8276	33.9862	34.869
DNA-Genome-Picea-abies-GCA_900067695.1-2016-11-09.one_line	11960690255	25	5	AGCN_1233	2825	20.9912	22.5487	22.7965	25.8761	31.115	27.4336	28.6018
DNA-Genome-Picea-abies-GCA_900067695.1-2016-11-09.one_line	11960690255	25	5	CNATG_12344	2725	20.7339	23.2661	22.7523	24.5505	31.8165	28	29.211
DNA-Genome-Picea-abies-GCA_900067695.1-2016-11-09.one_line	11960690255	25	5	CAN_122	2475	11.7576	14.2222	13.5758	15.596	20.3232	15.798	17.2929
DNA-Genome-Picea-abies-GCA_900067695.1-2016-11-09.one_line	11960690255	25	5	TN_11	2475	6.2626	7.2727	7.7576	8.5253	17.4141	9.8586	10.6667
DNA-Genome-Picea-abies-GCA_900067695.1-2016-11-09.one_line	11960690255	25	5	ACGN_1233	2450	22.1633	23.3061	23.9184	27.5102	33.1429	28.898	30.2041
DNA-Genome-Picea-abies-GCA_900067695.1-2016-11-09.one_line	11960690255	25	5	NCGAT_12344	2375	20.5474	23.2421	22.4842	23.2842	33.4316	29.0526	30.4842
DNA-Genome-Picea-abies-GCA_900067695.1-2016-11-09.one_line	11960690255	25	5	NTCG_1233	2350	17.8298	21.0213	18.8085	20.8936	29.2766	24.8936	26.2128
DNA-Genome-Picea-abies-GCA_900067695.1-2016-11-09.one_line	11960690255	25	5	CGTAN_12344	2350	28.0851	26.383	30.6383	32.2128	41.0638	36.6809	38.1277
DNA-Genome-Picea-abies-GCA_900067695.1-2016-11-09.one_line	11960690255	25	5	TGCN_1233	2200	22.2727	22.6818	23.6364	26.9091	33.4091	28.7273	30.1818
DNA-Genome-Picea-abies-GCA_900067695.1-2016-11-09.one_line	11960690255	25	5	NGCAT_12344	2125	20.9412	23.4353	23.1529	24.2824	34.4	29.5059	31.0588
DNA-Genome-Picea-abies-GCA_900067695.1-2016-11-09.one_line	11960690255	25	5	NACG_1233	2100	17.1905	21.2381	18.381	20.0476	29.5714	24.619	26.2857
DNA-Genome-Picea-abies-GCA_900067695.1-2016-11-09.one_line	11960690255	25	5	GTN_122	2075	12.7229	15.3253	14.3614	16.4337	23.0843	17.0602	18.6988
DNA-Genome-Picea-abies-GCA_900067695.1-2016-11-09.one_line	11960690255	25	5	C_1	2025	1.5802	0.5926	3.358	2.2222	7.4074	2.4691	4.1481
DNA-Genome-Picea-abies-GCA_900067695.1-2016-11-09.one_line	11960690255	25	5	G_1	2000	1.6	0.6	3.4	2.25	7.5	2.5	4.2
DNA-Genome-Picea-abies-GCA_900067695.1-2016-11-09.one_line	11960690255	25	5	CGATN_12344	1975	28.557	26.5316	31.2911	32.3038	42.6835	37.4177	39.0886
DNA-Genome-Picea-abies-GCA_900067695.1-2016-11-09.one_line	11960690255	25	5	GCATN_12344	1875	28.16	27.2	30.9333	32.2133	41.8667	36.32	38.1867
DNA-Genome-Picea-abies-GCA_900067695.1-2016-11-09.one_line	11960690255	25	5	CG_11	1725	8.9855	10.1449	11.2464	13.1014	19.942	13.2754	14.8406
DNA-Genome-Picea-abies-GCA_900067695.1-2016-11-09.one_line	11960690255	25	5	GNCAT_12344	1675	21.194	23.4627	23.1642	24.3582	34.6866	28.4179	30.5672
DNA-Genome-Picea-abies-GCA_900067695.1-2016-11-09.one_line	11960690255	25	5	A_1	1650	1.9394	0.7273	4.1212	2.6667	9.1515	2.9091	4.8485
DNA-Genome-Picea-abies-GCA_900067695.1-2016-11-09.one_line	11960690255	25	5	CNGAT_12344	1550	22.9677	24.8387	25.1613	26.3226	37.4194	30.7097	32.7742
DNA-Genome-Picea-abies-GCA_900067695.1-2016-11-09.one_line	11960690255	25	5	GACN_1233	1500	22.2	23.4	24.6667	27.8667	36.8667	29.9333	32.2667
DNA-Genome-Picea-abies-GCA_900067695.1-2016-11-09.one_line	11960690255	25	5	AN_11	1475	7.4576	9.1525	9.7627	9.8983	25.6271	11.5254	13.2881
DNA-Genome-Picea-abies-GCA_900067695.1-2016-11-09.one_line	11960690255	25	5	GN_11	1150	8.3478	8.9565	10.9565	10.9565	25.3043	12.6087	14.6087
DNA-Genome-Picea-abies-GCA_900067695.1-2016-11-09.one_line	11960690255	25	5	CTGN_1233	1125	25.2444	24.2667	27.0222	30.1333	41.6889	32.3556	35.5556
DNA-Genome-Picea-abies-GCA_900067695.1-2016-11-09.one_line	11960690255	25	5	GNAC_1233	1100	18.1818	20.4545	20.1818	21.7273	34.8182	25.2727	28.3636
DNA-Genome-Picea-abies-GCA_900067695.1-2016-11-09.one_line	11960690255	25	5	T_1	1075	2.9767	1.1163	6.3256	4.186	13.6744	4.093	7.0698
DNA-Genome-Picea-abies-GCA_900067695.1-2016-11-09.one_line	11960690255	25	5	GTCN_1233	1050	25.4286	24.4762	27.0476	30.6667	43.0476	33.0476	36.1905
DNA-Genome-Picea-abies-GCA_900067695.1-2016-11-09.one_line	11960690255	25	5	CNAG_1233	975	18.1538	19.7949	20.1026	21.641	35.1795	24.6154	27.8974
DNA-Genome-Picea-abies-GCA_900067695.1-2016-11-09.one_line	11960690255	25	5	CNTG_1233	950	20.2105	21.1579	21.4737	23.8947	37.3684	26.4211	29.8947
DNA-Genome-Picea-abies-GCA_900067695.1-2016-11-09.one_line	11960690255	25	5	GNCT_1233	925	19.3514	20	20.5405	22.7027	36.5405	24.5405	28.1081
DNA-Genome-Picea-abies-GCA_900067695.1-2016-11-09.one_line	11960690255	25	5	CN_11	900	9.4444	9.7778	12.6667	12.4444	32.3333	13.6667	16.8889
DNA-Genome-Picea-abies-GCA_900067695.1-2016-11-09.one_line	11960690255	25	5	CAGN_1233	850	24.7059	25.1765	27.2941	29.7647	45.7647	33.5294	37.6471
DNA-Genome-Picea-abies-GCA_900067695.1-2016-11-09.one_line	11960690255	25	5	NCTG_1233	725	24.5517	24.4138	25.931	27.0345	47.0345	32.6897	37.5172
DNA-Genome-Picea-abies-GCA_900067695.1-2016-11-09.one_line	11960690255	25	5	NCT_122	675	16	13.9259	18.0741	16.1481	36.4444	18.2222	23.1111
DNA-Genome-Picea-abies-GCA_900067695.1-2016-11-09.one_line	11960690255	25	5	GCNAT_12344	500	34.2	32.2	38.8	38.6	65.4	44.4	51.2
DNA-Genome-Picea-abies-GCA_900067695.1-2016-11-09.one_line	11960690255	25	5	NAC_122	450	18.4444	15.5556	22.6667	19.5556	49.7778	22.4444	30.2222
DNA-Genome-Picea-abies-GCA_900067695.1-2016-11-09.one_line	11960690255	25	5	NGAC_1233	450	27.1111	27.3333	31.1111	30.4444	60.2222	37.1111	44.4444
DNA-Genome-Picea-abies-GCA_900067695.1-2016-11-09.one_line	11960690255	25	5	NAG_122	425	19.5294	16.9412	23.5294	20.2353	48.9412	23.5294	31.0588
DNA-Genome-Picea-abies-GCA_900067695.1-2016-11-09.one_line	11960690255	25	5	CGNAT_12344	425	35.7647	32.9412	40.4706	39.5294	68.7059	44.2353	51.7647
DNA-Genome-Picea-abies-GCA_900067695.1-2016-11-09.one_line	11960690255	25	5	NTG_122	375	22.1333	19.7333	25.6	23.2	52.5333	24.8	34.1333
DNA-Genome-Picea-abies-GCA_900067695.1-2016-11-09.one_line	11960690255	25	5	NCAG_1233	350	30.2857	26.8571	34.8571	34.2857	69.7143	40	49.1429
DNA-Genome-Picea-abies-GCA_900067695.1-2016-11-09.one_line	11960690255	25	5	CGAN_1233	325	33.5385	27.3846	40	39.3846	75.6923	43.6923	54.1538
DNA-Genome-Picea-abies-GCA_900067695.1-2016-11-09.one_line	11960690255	25	5	GCTN_1233	300	35.6667	27.3333	40.6667	40.3333	80.3333	45.6667	57.3333
DNA-Genome-Picea-abies-GCA_900067695.1-2016-11-09.one_line	11960690255	25	5	NGCT_1233	300	35.3333	30.6667	39.3333	36	79.3333	44.6667	56
DNA-Genome-Picea-abies-GCA_900067695.1-2016-11-09.one_line	11960690255	25	5	CGN_122	250	27.2	19.6	35.2	32.4	74.8	33.2	46.4
DNA-Genome-Picea-abies-GCA_900067695.1-2016-11-09.one_line	11960690255	25	5	GCN_122	200	31.5	23	41	36.5	86	34	50
DNA-Genome-Picea-abies-GCA_900067695.1-2016-11-09.one_line	11960690255	25	5	GCAN_1233	125	55.2	39.2	73.6	64	153.6	70.4	92.8
DNA-Genome-Picea-abies-GCA_900067695.1-2016-11-09.one_line	11960690255	25	5	CGTN_1233	25	160	84	284	192	640	212	336
DNA-Genome-Picea-abies-GCA_900067695.1-2016-11-09.one_line	11960690255	50	5	ACTG_2222	5446604655	23.896	21.1679	23.7993	26.9721	19.7167	22.0486	22.0825
DNA-Genome-Picea-abies-GCA_900067695.1-2016-11-09.one_line	11960690255	50	5	TACG_1233	2195615150	22.5652	21.446	22.8283	26.1771	20.9195	22.5793	22.6015
DNA-Genome-Picea-abies-GCA_900067695.1-2016-11-09.one_line	11960690255	50	5	ATCG_1233	1944557850	22.5166	21.4238	22.7891	26.1468	20.9513	22.5849	22.6066
DNA-Genome-Picea-abies-GCA_900067695.1-2016-11-09.one_line	11960690255	50	5	TCAG_1233	574008800	21.8816	20.5003	21.8815	25.9884	19.6284	21.3581	21.4002
DNA-Genome-Picea-abies-GCA_900067695.1-2016-11-09.one_line	11960690255	50	5	AGCT_1233	495234200	21.8992	20.5906	21.9408	25.9309	19.7725	21.4573	21.5004
DNA-Genome-Picea-abies-GCA_900067695.1-2016-11-09.one_line	11960690255	50	5	ACTG_1233	462827850	21.8632	20.7012	21.9076	25.9516	19.973	21.6546	21.6882
DNA-Genome-Picea-abies-GCA_900067695.1-2016-11-09.one_line	11960690255	50	5	TGAC_1233	358656900	21.7695	20.5896	21.7564	25.7893	19.9071	21.5449	21.5759
DNA-Genome-Picea-abies-GCA_900067695.1-2016-11-09.one_line	11960690255	50	5	GACT_1233	120171150	21.152	20.083	21.0949	25.5622	19.2804	20.7073	20.7372
DNA-Genome-Picea-abies-GCA_900067695.1-2016-11-09.one_line	11960690255	50	5	CTAG_1233	114135750	20.6998	19.6005	20.625	25.3045	18.8319	20.2809	20.2941
DNA-Genome-Picea-abies-GCA_900067695.1-2016-11-09.one_line	11960690255	50	5	CATG_1233	93491350	20.6828	19.643	20.5558	25.3364	18.9446	20.2439	20.2398
DNA-Genome-Picea-abies-GCA_900067695.1-2016-11-09.one_line	11960690255	50	5	GTAC_1233	74685750	20.862	19.8581	20.661	25.3775	19.2972	20.4357	20.4382
DNA-Genome-Picea-abies-GCA_900067695.1-2016-11-09.one_line	11960690255	50	5	ACT_122	12278600	16.4165	16.6859	16.7233	20.4407	17.1697	17.3562	17.1766
DNA-Genome-Picea-abies-GCA_900067695.1-2016-11-09.one_line	11960690255	50	5	TAG_122	11023000	16.4036	16.7098	16.7279	20.371	17.2156	17.3899	17.2066
DNA-Genome-Picea-abies-GCA_900067695.1-2016-11-09.one_line	11960690255	50	5	ATG_122	10105350	16.5521	16.7903	16.8391	20.5	17.3648	17.5194	17.3419
DNA-Genome-Picea-abies-GCA_900067695.1-2016-11-09.one_line	11960690255	50	5	TAC_122	9570350	16.4914	16.6798	16.7586	20.4144	17.2721	17.4321	17.2481
DNA-Genome-Picea-abies-GCA_900067695.1-2016-11-09.one_line	11960690255	50	5	GCAT_1233	7113100	18.9122	18.6308	19.0198	23.226	18.7936	18.8724	18.7936
DNA-Genome-Picea-abies-GCA_900067695.1-2016-11-09.one_line	11960690255	50	5	CGAT_1233	6902650	18.7259	18.4512	18.8214	23.0654	18.6124	18.6806	18.6133
DNA-Genome-Picea-abies-GCA_900067695.1-2016-11-09.one_line	11960690255	50	5	CAT_122	4136150	15.3443	16.1918	15.5642	19.0916	16.2054	16.3134	16.1786
DNA-Genome-Picea-abies-GCA_900067695.1-2016-11-09.one_line	11960690255	50	5	ATGCN_22233	3594700	23.5933	24.6979	23.9938	27.1123	24.2659	24.2377	24.2678
DNA-Genome-Picea-abies-GCA_900067695.1-2016-11-09.one_line	11960690255	50	5	ACTGN_22233	3246500	23.4438	24.5222	23.8769	27.0641	24.1289	24.1008	24.1109
DNA-Genome-Picea-abies-GCA_900067695.1-2016-11-09.one_line	11960690255	50	5	GAT_122	2866500	15.6045	16.4073	15.8324	19.1966	16.5166	16.6127	16.4909
DNA-Genome-Picea-abies-GCA_900067695.1-2016-11-09.one_line	11960690255	50	5	AT_11	1456500	7.3686	8.1057	7.4604	9.6176	9.0591	9.4695	9.0483
DNA-Genome-Picea-abies-GCA_900067695.1-2016-11-09.one_line	11960690255	50	5	CTGAN_22233	795300	23.9876	25.1703	24.4818	26.7615	24.9398	24.9332	24.9169
DNA-Genome-Picea-abies-GCA_900067695.1-2016-11-09.one_line	11960690255	50	5	ATNCG_22233	722800	21.3042	24.1197	21.9447	24.3675	23.6551	23.6462	23.6198
DNA-Genome-Picea-abies-GCA_900067695.1-2016-11-09.one_line	11960690255	50	5	ACGTN_22233	698800	24.007	25.2577	24.5146	26.8052	25.0585	25.077	25.0321
DNA-Genome-Picea-abies-GCA_900067695.1-2016-11-09.one_line	11960690255	50	5	ATGCN_12344	578200	23.1422	23.8616	23.8661	26.5294	24.5835	24.5543	24.5403
DNA-Genome-Picea-abies-GCA_900067695.1-2016-11-09.one_line	11960690255	50	5	TAGCN_12344	549300	23.0768	23.7903	23.8067	26.5145	24.529	24.4995	24.4995
DNA-Genome-Picea-abies-GCA_900067695.1-2016-11-09.one_line	11960690255	50	5	ATCGN_12344	498400	23.0142	23.735	23.7584	26.4757	24.4799	24.4669	24.4342
DNA-Genome-Picea-abies-GCA_900067695.1-2016-11-09.one_line	11960690255	50	5	TACGN_12344	475550	22.998	23.6577	23.7519	26.4218	24.4666	24.3873	24.4037
DNA-Genome-Picea-abies-GCA_900067695.1-2016-11-09.one_line	11960690255	50	5	TACGN_13333	356000	21.6949	23.8567	22.4017	25.0407	23.5525	23.4958	23.5202
DNA-Genome-Picea-abies-GCA_900067695.1-2016-11-09.one_line	11960690255	50	5	ACTGN_13333	354800	21.7139	23.7573	22.4262	25.0967	23.52	23.4428	23.4735
DNA-Genome-Picea-abies-GCA_900067695.1-2016-11-09.one_line	11960690255	50	5	AGTCN_12344	217000	23.1724	23.9765	23.9198	26.6203	24.9484	24.8562	24.9364
DNA-Genome-Picea-abies-GCA_900067695.1-2016-11-09.one_line	11960690255	50	5	TCAGN_12344	206350	22.9513	23.6516	23.6928	26.33	24.6082	24.5636	24.5253
DNA-Genome-Picea-abies-GCA_900067695.1-2016-11-09.one_line	11960690255	50	5	ACTGN_12344	192000	22.6563	23.3667	23.3823	26.0047	24.399	24.2542	24.2813
DNA-Genome-Picea-abies-GCA_900067695.1-2016-11-09.one_line	11960690255	50	5	CTNAG_22233	176900	21.3431	24.3166	22.0961	24.5297	24.4014	24.4076	24.3912
DNA-Genome-Picea-abies-GCA_900067695.1-2016-11-09.one_line	11960690255	50	5	AGNCT_22233	167300	21.3724	24.3126	22.1148	24.4573	24.5678	24.5505	24.4806
DNA-Genome-Picea-abies-GCA_900067695.1-2016-11-09.one_line	11960690255	50	5	ACNTG_22233	155850	21.2268	23.9621	21.9262	24.1527	24.1829	24.1514	24.1155
DNA-Genome-Picea-abies-GCA_900067695.1-2016-11-09.one_line	11960690255	50	5	TGACN_12344	153950	22.8094	23.6044	23.5453	26.102	24.7912	24.5995	24.595
DNA-Genome-Picea-abies-GCA_900067695.1-2016-11-09.one_line	11960690255	50	5	ACG_122	145350	13.9938	14.1163	14.2814	16.3825	15.2453	15.0581	14.9377
DNA-Genome-Picea-abies-GCA_900067695.1-2016-11-09.one_line	11960690255	50	5	TCG_122	142400	13.9888	14.2015	14.2739	16.3989	15.3553	15.2346	15.1292
DNA-Genome-Picea-abies-GCA_900067695.1-2016-11-09.one_line	11960690255	50	5	TGNAC_22233	140550	21.1953	24.0021	21.9139	24.1274	24.2092	24.1693	24.1537
DNA-Genome-Picea-abies-GCA_900067695.1-2016-11-09.one_line	11960690255	50	5	ATNCG_12344	134150	19.9202	22.0634	20.823	23.9821	22.9884	22.773	22.8013
DNA-Genome-Picea-abies-GCA_900067695.1-2016-11-09.one_line	11960690255	50	5	CT_11	134050	6.038	7.5517	6.2051	7.6136	8.1992	8.5513	8.0239
DNA-Genome-Picea-abies-GCA_900067695.1-2016-11-09.one_line	11960690255	50	5	TANCG_12344	127050	19.9331	22.0331	20.8564	23.9937	22.8855	22.7092	22.7501
DNA-Genome-Picea-abies-GCA_900067695.1-2016-11-09.one_line	11960690255	50	5	AG_11	114250	5.9589	7.3996	6.1724	7.4608	8.1374	8.4298	7.8915
DNA-Genome-Picea-abies-GCA_900067695.1-2016-11-09.one_line	11960690255	50	5	TCGAN_12344	84450	23.5808	24.7732	24.5613	27.2647	26.3919	26.2451	26.2735
DNA-Genome-Picea-abies-GCA_900067695.1-2016-11-09.one_line	11960690255	50	5	ACGTN_12344	68050	23.2623	24.0456	24.1734	26.6995	25.8942	25.6106	25.6988
DNA-Genome-Picea-abies-GCA_900067695.1-2016-11-09.one_line	11960690255	50	5	CTAGN_12344	65100	23.3149	24.3794	24.3103	27.0998	26.3103	26.0476	26.0768
DNA-Genome-Picea-abies-GCA_900067695.1-2016-11-09.one_line	11960690255	50	5	GATCN_12344	60750	23.2609	24.5695	24.2436	27.1523	26.377	26.2173	26.2255
DNA-Genome-Picea-abies-GCA_900067695.1-2016-11-09.one_line	11960690255	50	5	TGCAN_12344	59200	23.3378	24.2365	24.2669	26.7855	26.1706	25.8446	25.9595
DNA-Genome-Picea-abies-GCA_900067695.1-2016-11-09.one_line	11960690255	50	5	AGCTN_12344	52900	23.6975	24.8147	24.7486	27.4178	26.8677	26.7183	26.7826
DNA-Genome-Picea-abies-GCA_900067695.1-2016-11-09.one_line	11960690255	50	5	CTG_122	50100	12.9541	15.006	13.4212	16.012	15.6647	15.1317	15.1297
DNA-Genome-Picea-abies-GCA_900067695.1-2016-11-09.one_line	11960690255	50	5	ATN_122	47550	4.1577	5.0894	4.3197	5.6635	8.2776	6.2965	5.8465
DNA-Genome-Picea-abies-GCA_900067695.1-2016-11-09.one_line	11960690255	50	5	AC_11	43250	2.1873	2.9434	2.5295	3.1514	4.4763	3.7688	3.6439
DNA-Genome-Picea-abies-GCA_900067695.1-2016-11-09.one_line	11960690255	50	5	CATGN_12344	42800	23.486	24.6776	24.528	27.3341	26.7687	26.5	26.5794
DNA-Genome-Picea-abies-GCA_900067695.1-2016-11-09.one_line	11960690255	50	5	TG_11	40300	2.3127	3.0422	2.6799	3.2754	4.7171	3.871	3.7618
DNA-Genome-Picea-abies-GCA_900067695.1-2016-11-09.one_line	11960690255	50	5	GTACN_12344	37850	23.4425	24.5495	24.4967	27.1704	26.8269	26.4729	26.5152
DNA-Genome-Picea-abies-GCA_900067695.1-2016-11-09.one_line	11960690255	50	5	GAC_122	35000	13.4829	15.4714	14.04	16.6343	16.5771	15.9629	16
DNA-Genome-Picea-abies-GCA_900067695.1-2016-11-09.one_line	11960690255	50	5	AGNCT_12344	27950	19.8998	21.8819	21.0662	24.0107	24.0179	23.5277	23.585
DNA-Genome-Picea-abies-GCA_900067695.1-2016-11-09.one_line	11960690255	50	5	TCNAG_12344	27200	19.9338	21.9743	21.1324	24.1397	24.1838	23.5882	23.8529
DNA-Genome-Picea-abies-GCA_900067695.1-2016-11-09.one_line	11960690255	50	5	TAGN_1233	23250	15.0237	16.7054	15.6645	18.1763	19.5484	18.1505	18.0129
DNA-Genome-Picea-abies-GCA_900067695.1-2016-11-09.one_line	11960690255	50	5	CATGN_13333	21700	21.5806	24.2995	22.6452	25	25.9816	25.4977	25.6406
DNA-Genome-Picea-abies-GCA_900067695.1-2016-11-09.one_line	11960690255	50	5	GACTN_13333	20500	21.4195	23.922	22.478	24.6927	25.6634	25.1366	25.3268
DNA-Genome-Picea-abies-GCA_900067695.1-2016-11-09.one_line	11960690255	50	5	CTGAN_12344	19950	24.2707	25.1729	25.5639	28.0301	28.6065	28.0201	28.1704
DNA-Genome-Picea-abies-GCA_900067695.1-2016-11-09.one_line	11960690255	50	5	ATCN_1233	19650	15.6845	17.5165	16.3664	18.9822	20.2952	18.9313	18.9109
DNA-Genome-Picea-abies-GCA_900067695.1-2016-11-09.one_line	11960690255	50	5	TACN_1233	19400	14.5722	16.3454	15.299	17.7423	19.5825	18.0052	17.8557
DNA-Genome-Picea-abies-GCA_900067695.1-2016-11-09.one_line	11960690255	50	5	TAN_122	18550	4.7709	5.8706	5.1213	6.4151	10.0701	7.2075	6.7709
DNA-Genome-Picea-abies-GCA_900067695.1-2016-11-09.one_line	11960690255	50	5	CGNAT_22233	18250	22.1041	24.6959	23.1781	24.9699	26.9041	26.3288	26.4986
DNA-Genome-Picea-abies-GCA_900067695.1-2016-11-09.one_line	11960690255	50	5	ATGN_1233	18250	15.6438	17.1397	16.3288	18.7342	20.2356	18.663	18.5644
DNA-Genome-Picea-abies-GCA_900067695.1-2016-11-09.one_line	11960690255	50	5	TGNAC_12344	17500	19.8571	21.5657	21.0857	23.6571	24.5086	23.6514	23.9086
DNA-Genome-Picea-abies-GCA_900067695.1-2016-11-09.one_line	11960690255	50	5	ACNTG_12344	17400	19.9655	21.5747	21.1724	23.7759	24.5115	23.6839	23.8621
DNA-Genome-Picea-abies-GCA_900067695.1-2016-11-09.one_line	11960690255	50	5	CAGTN_12344	12300	24.2114	24.9593	25.561	27.878	28.7967	27.9268	28.1626
DNA-Genome-Picea-abies-GCA_900067695.1-2016-11-09.one_line	11960690255	50	5	GACTN_12344	12100	24.3388	25.3306	25.8182	28.124	29.2149	28.4959	28.6612
DNA-Genome-Picea-abies-GCA_900067695.1-2016-11-09.one_line	11960690255	50	5	GTCAN_12344	11500	24.113	25.2348	25.4609	27.6174	29.1826	28.2174	28.487
DNA-Genome-Picea-abies-GCA_900067695.1-2016-11-09.one_line	11960690255	50	5	GANCT_12344	10000	19.98	22.07	21.52	24.43	25.98	24.82	25.12
DNA-Genome-Picea-abies-GCA_900067695.1-2016-11-09.one_line	11960690255	50	5	TCAN_1233	9750	15.6923	17.6103	16.5128	19.0462	21.8154	19.7026	19.7333
DNA-Genome-Picea-abies-GCA_900067695.1-2016-11-09.one_line	11960690255	50	5	CTNAG_12344	8800	20.0455	22.1591	21.5227	24.4205	26.3636	24.7841	25.1818
DNA-Genome-Picea-abies-GCA_900067695.1-2016-11-09.one_line	11960690255	50	5	AGTN_1233	8700	16.6322	17.931	17.4023	19.8046	21.931	20.023	20.3218
DNA-Genome-Picea-abies-GCA_900067695.1-2016-11-09.one_line	11960690255	50	5	ATGN_2222	8350	19.8084	23.2695	20.6946	23.2695	25.1257	23.7365	24
DNA-Genome-Picea-abies-GCA_900067695.1-2016-11-09.one_line	11960690255	50	5	CAG_122	8050	12.7453	13.0559	13.6149	15.2795	17.7267	15.4161	15.7516
DNA-Genome-Picea-abies-GCA_900067695.1-2016-11-09.one_line	11960690255	50	5	GATN_1233	8000	16.9375	18.8625	17.775	20.65	22.5	20.6125	20.95
DNA-Genome-Picea-abies-GCA_900067695.1-2016-11-09.one_line	11960690255	50	5	ACTN_2222	7750	20.2968	23.5613	21.1613	23.6903	25.5742	24.1935	24.6194
DNA-Genome-Picea-abies-GCA_900067695.1-2016-11-09.one_line	11960690255	50	5	GCT_122	7100	11.507	11.9577	12.338	14.0141	16.9437	14.6056	14.7042
DNA-Genome-Picea-abies-GCA_900067695.1-2016-11-09.one_line	11960690255	50	5	CTAN_1233	7050	17.8156	19.8723	18.8369	21.8865	24.3688	21.8298	22.4113
DNA-Genome-Picea-abies-GCA_900067695.1-2016-11-09.one_line	11960690255	50	5	CTN_122	6450	5.3643	6.3411	6.0465	7.0698	12.6047	7.5659	7.814
DNA-Genome-Picea-abies-GCA_900067695.1-2016-11-09.one_line	11960690255	50	5	ACTN_1233	5800	17.3621	18.6552	18.0345	20.6552	23.5517	20.8276	21.3793
DNA-Genome-Picea-abies-GCA_900067695.1-2016-11-09.one_line	11960690255	50	5	AGN_122	5250	5.6	6.7619	6.4	7.3714	13.3714	8.2667	8.381
DNA-Genome-Picea-abies-GCA_900067695.1-2016-11-09.one_line	11960690255	50	5	ANTCG_12344	4950	17.6162	19.8182	19.1111	21.2727	25.7172	23.7172	24.3232
DNA-Genome-Picea-abies-GCA_900067695.1-2016-11-09.one_line	11960690255	50	5	TGAN_1233	4700	18.1489	19.8723	19.0638	22.0213	25.383	22.2979	23.0638
DNA-Genome-Picea-abies-GCA_900067695.1-2016-11-09.one_line	11960690255	50	5	TNACG_12344	4550	17.5824	19.8681	19.1648	20.8791	26.1758	23.4066	24.2637
DNA-Genome-Picea-abies-GCA_900067695.1-2016-11-09.one_line	11960690255	50	5	CANTG_12344	4100	21.7073	23.561	23.5122	25.7073	29.9756	27.3902	28.2927
DNA-Genome-Picea-abies-GCA_900067695.1-2016-11-09.one_line	11960690255	50	5	GTNAC_12344	4100	21.4634	23	23.0244	25.7561	29.5122	26.9512	27.8049
DNA-Genome-Picea-abies-GCA_900067695.1-2016-11-09.one_line	11960690255	50	5	CATN_1233	3950	18.0253	19.6962	19.0886	21.5443	27.1646	22.7595	23.5949
DNA-Genome-Picea-abies-GCA_900067695.1-2016-11-09.one_line	11960690255	50	5	ACN_122	3950	6.0759	6.962	7.038	8.1266	14.2532	8.7089	8.9114
DNA-Genome-Picea-abies-GCA_900067695.1-2016-11-09.one_line	11960690255	50	5	GCTAN_12344	3800	25.5263	26.3947	27.3684	29.6053	34.5526	31.6579	32.5263
DNA-Genome-Picea-abies-GCA_900067695.1-2016-11-09.one_line	11960690255	50	5	CGTAN_12344	3700	26.2432	26.7568	28.2703	30.2973	35.2432	32.4324	33.2973
DNA-Genome-Picea-abies-GCA_900067695.1-2016-11-09.one_line	11960690255	50	5	CGATN_12344	3350	25.791	26.2388	27.7612	29.5821	34.6866	31.5522	32.597
DNA-Genome-Picea-abies-GCA_900067695.1-2016-11-09.one_line	11960690255	50	5	GCATN_12344	3300	26.5758	26.697	28.7273	30.8788	36.3333	33.1212	34.1818
DNA-Genome-Picea-abies-GCA_900067695.1-2016-11-09.one_line	11960690255	50	5	TGN_122	2900	7.069	7.5862	8	9.1034	16.5172	9.6897	10.3448
DNA-Genome-Picea-abies-GCA_900067695.1-2016-11-09.one_line	11960690255	50	5	TCN_122	2750	8.0727	8.9818	9.1636	10.1455	17.6364	10.4727	11.2
DNA-Genome-Picea-abies-GCA_900067695.1-2016-11-09.one_line	11960690255	50	5	TNCAG_12344	2400	19.4583	20.9583	21.4167	23.1667	30.4167	26	27.3333
DNA-Genome-Picea-abies-GCA_900067695.1-2016-11-09.one_line	11960690255	50	5	TNGAC_12344	2400	19.25	20.875	21.3333	22.8333	30.3333	25.4167	26.8333
DNA-Genome-Picea-abies-GCA_900067695.1-2016-11-09.one_line	11960690255	50	5	GTAN_1233	2400	18.8333	19.75	19.9167	22.75	29.3333	23.6667	25
DNA-Genome-Picea-abies-GCA_900067695.1-2016-11-09.one_line	11960690255	50	5	ANGCT_12344	2400	20	21.75	21.9167	23.6667	31.2917	26.7917	28.1667
DNA-Genome-Picea-abies-GCA_900067695.1-2016-11-09.one_line	11960690255	50	5	GAN_122	2300	7.6087	8.2609	8.7826	9.1304	18.6957	10.3043	11.3043
DNA-Genome-Picea-abies-GCA_900067695.1-2016-11-09.one_line	11960690255	50	5	ANCTG_12344	1350	22	23.1852	24.1481	25.6296	36.5926	28.963	31.4074
DNA-Genome-Picea-abies-GCA_900067695.1-2016-11-09.one_line	11960690255	50	5	CAN_122	1250	8.8	8.16	10.4	10.08	23.68	11.2	12.48
DNA-Genome-Picea-abies-GCA_900067695.1-2016-11-09.one_line	11960690255	50	5	GTN_122	1250	9.28	8.48	10.56	10.8	23.92	11.6	13.76
DNA-Genome-Picea-abies-GCA_900067695.1-2016-11-09.one_line	11960690255	50	5	GNTAC_12344	1100	21.1818	21.4545	23.0909	24.1818	38.5455	28.4545	31.6364
DNA-Genome-Picea-abies-GCA_900067695.1-2016-11-09.one_line	11960690255	50	5	CNTAG_12344	800	23.625	23	26	27.625	44.25	31.25	35.5
DNA-Genome-Picea-abies-GCA_900067695.1-2016-11-09.one_line	11960690255	50	5	ACGN_1233	750	21.7333	21.0667	24.5333	25.0667	43.4667	28.1333	32.5333
DNA-Genome-Picea-abies-GCA_900067695.1-2016-11-09.one_line	11960690255	50	5	TNAC_1233	750	19.3333	19.0667	21.6	23.8667	41.4667	25.4667	29.8667
DNA-Genome-Picea-abies-GCA_900067695.1-2016-11-09.one_line	11960690255	50	5	TNAG_1233	750	19.3333	19.2	21.3333	23.3333	38.9333	24	28.2667
DNA-Genome-Picea-abies-GCA_900067695.1-2016-11-09.one_line	11960690255	50	5	AGCN_1233	700	20.7143	18.5714	23.4286	24.2857	43.2857	25.7143	30.2857
DNA-Genome-Picea-abies-GCA_900067695.1-2016-11-09.one_line	11960690255	50	5	GNACT_12344	650	24	22.7692	27.0769	28.3077	47.8462	30.9231	35.6923
DNA-Genome-Picea-abies-GCA_900067695.1-2016-11-09.one_line	11960690255	50	5	GCNAT_12344	650	27.3846	25.3846	29.8462	31.2308	50.6154	34.6154	40
DNA-Genome-Picea-abies-GCA_900067695.1-2016-11-09.one_line	11960690255	50	5	GACN_1233	600	20.8333	18.5	24	23.8333	49.5	25.3333	30.6667
DNA-Genome-Picea-abies-GCA_900067695.1-2016-11-09.one_line	11960690255	50	5	TCGN_1233	600	22.6667	18.5	24.6667	24.8333	49.6667	28.1667	33.3333
DNA-Genome-Picea-abies-GCA_900067695.1-2016-11-09.one_line	11960690255	50	5	CGNAT_12344	500	32.6	27.8	36	36.8	61	40.2	47.2
DNA-Genome-Picea-abies-GCA_900067695.1-2016-11-09.one_line	11960690255	50	5	ANCT_1233	500	23.2	21.2	25.6	25.8	51.2	28.8	35.2
DNA-Genome-Picea-abies-GCA_900067695.1-2016-11-09.one_line	11960690255	50	5	ANTG_1233	400	27.75	25	31	30.75	61.25	35.25	44
DNA-Genome-Picea-abies-GCA_900067695.1-2016-11-09.one_line	11960690255	50	5	CNATG_12344	400	30	26.25	34.5	32.5	64.25	38.25	47
[truncated: 31,603 more rows]
