# Supplementary material for: A Novel Lossless Encoding Algorithm for Data Compression - Genomics Data as an Exemplar
Source: bioRxiv preprint, doi:10.1101/2020.08.24.264366, version 2 (2024-01-11)
Supplement: Supplemental_Table 10 [file 264366_file06.xlsx]

## Sheet: Sheet1
Genome	Genome Size (bytes)	Window Length	Label Length	Bin Label	Bin Size (bytes)	Compression ratio (%) using OST-DNA-bcm	Compression ratio (%) using OST-DNA-brotli	Compression ratio(%) using OST-DNA-bsc	Compression ratio (%) using OST-DNA-bzip2	Compression ratio (%) using OST-DNA-lrzip	Compression ratio (%) using OST-DNA-lzip	Compression ratio (%) using OST-DNA-xz
DNA-Genome-Picea-abies-GCA_900067695.1-2016-11-09.one_line	11960690255	25	5	ACGTN_12344	38950	24.3877	25.2965	25.5815	28.3594	28.5597	28.38	28.3646
DNA-Genome-Strongylocentrotus-purpuratus-GCF_000002235.4-2015-03-10.one_line	659082267	25	5	ACGTN_12344	13250	25.5019	25.366	27.3057	29.5245	31.6604	30.9736	31.0943
DNA-Influenza-2019-04-27.one_line	1106180040	25	5	ACGTN_12344	4650	25.2903	23.7204	26.8387	27.8495	31.5699	29.2043	29.9355
DNA-Helicobacter-2019-04-24.one_line	2711601413	25	5	ACGTN_12344	1825	27.9452	26.137	30.5753	32	41.6438	36	37.6986
DNA-NCBI-Virus-Complete-Nucleotide-Human-2020-05-11.one_line	470877038	25	5	ACGTN_12344	1300	28.7692	23.5385	30.6154	30.6154	42.5385	33.6923	36.3077
DNA-Mitochondrion-2019-03-15.one_line	241606731	25	5	ACGTN_12344	1200	30.1667	26.8333	33.1667	33.5833	47.8333	39.1667	42
DNA-Genome-Astrammina-rara-GCA_000211355.2-2011-04-27.one_line	1362918	25	5	ACGTN_12344	450	38	28.6667	44.4444	41.5556	75.5556	52.6667	59.5556
DNA-Genome-Salpingoeca-rosetta-GCA_000188695.1-2011-02-10.one_line	37299580	25	5	ACGTN_12344	350	41.1429	30.8571	48	43.7143	84	54.2857	64
DNA-Genome-Chondrus-crispus-GCA_000350225.2-2013-05-22.one_line	77592685	25	5	ACGTN_12344	125	60.8	39.2	81.6	68	166.4	83.2	105.6
DNA-Genome-Picea-abies-GCA_900067695.1-2016-11-09.one_line	11960690255	50	5	ACGTN_12344	68050	23.2623	24.0456	24.1734	26.6995	25.8942	25.6106	25.6988
DNA-Genome-Strongylocentrotus-purpuratus-GCF_000002235.4-2015-03-10.one_line	659082267	50	5	ACGTN_12344	12350	25.4251	26.0081	27.1417	29.3279	31.5142	30.8502	30.9312
DNA-Influenza-2019-04-27.one_line	1106180040	50	5	ACGTN_12344	4850	25.9381	24.4742	27.5464	29.0928	32.3918	29.7732	30.5979
DNA-Helicobacter-2019-04-24.one_line	2711601413	50	5	ACGTN_12344	2750	25.6727	24.9091	27.3455	29.3091	35.5636	31.4545	32.7273
DNA-NCBI-Virus-Complete-Nucleotide-Human-2020-05-11.one_line	470877038	50	5	ACGTN_12344	1900	28.3684	25.2632	30.3158	31.5789	40.5263	34.2632	36
DNA-Mitochondrion-2019-03-15.one_line	241606731	50	5	ACGTN_12344	1300	29.2308	26.5385	32	33.3077	46.6923	38.2308	40.9231
DNA-Genome-Astrammina-rara-GCA_000211355.2-2011-04-27.one_line	1362918	50	5	ACGTN_12344	750	32.8	27.6	37.0667	36.4	59.8667	45.8667	50.6667
DNA-Genome-Salpingoeca-rosetta-GCA_000188695.1-2011-02-10.one_line	37299580	50	5	ACGTN_12344	500	36	30.6	40.8	39	67.8	47	53.6
DNA-Genome-Chondrus-crispus-GCA_000350225.2-2013-05-22.one_line	77592685	50	5	ACGTN_12344	100	68	41	94	75	194	90	120
DNA-Genome-Picea-abies-GCA_900067695.1-2016-11-09.one_line	11960690255	100	5	ACGTN_12344	96700	22.6184	22.2296	23.2141	25.5129	23.3847	23.1148	23.181
DNA-Genome-Strongylocentrotus-purpuratus-GCF_000002235.4-2015-03-10.one_line	659082267	100	5	ACGTN_12344	7400	25.5811	26.2027	27.4054	29.5	32.5	31.3243	31.5676
DNA-Influenza-2019-04-27.one_line	1106180040	100	5	ACGTN_12344	5100	23.9804	20.7451	24.8627	26.1961	27.4118	24.8824	25.4902
DNA-Helicobacter-2019-04-24.one_line	2711601413	100	5	ACGTN_12344	3300	24.8485	23.5455	26.2424	28.0606	32	28.9091	29.8182
DNA-NCBI-Virus-Complete-Nucleotide-Human-2020-05-11.one_line	470877038	100	5	ACGTN_12344	2900	24.8276	20.1034	25.8621	26.8276	31.8966	26.5517	27.4483
DNA-Mitochondrion-2019-03-15.one_line	241606731	100	5	ACGTN_12344	2100	26.9524	25.2857	28.9524	30.4286	38	33.0952	34.4762
DNA-Genome-Astrammina-rara-GCA_000211355.2-2011-04-27.one_line	1362918	100	5	ACGTN_12344	500	36.4	29.6	42	38.8	70.6	49.6	56.8
DNA-Genome-Salpingoeca-rosetta-GCA_000188695.1-2011-02-10.one_line	37299580	100	5	ACGTN_12344	400	39.5	30.75	46	41.25	80.25	54.75	63
DNA-Genome-Chondrus-crispus-GCA_000350225.2-2013-05-22.one_line	77592685	100	5	ACGTN_12344	300	43	35	50	46	90.3333	56	66.6667
DNA-Genome-Picea-abies-GCA_900067695.1-2016-11-09.one_line	11960690255	125	5	ACGTN_12344	95000	22.7442	22.1926	23.3432	25.6253	23.3105	22.9716	23.0568
DNA-Influenza-2019-04-27.one_line	1106180040	125	5	ACGTN_12344	5625	23.2711	18.7556	24.1067	25.3156	24.9778	22.7733	23.2533
DNA-Genome-Strongylocentrotus-purpuratus-GCF_000002235.4-2015-03-10.one_line	659082267	125	5	ACGTN_12344	5500	25.6182	25.8909	27.3818	29.6545	33.2545	31.5818	32
DNA-Helicobacter-2019-04-24.one_line	2711601413	125	5	ACGTN_12344	3500	25.3143	25.2857	26.8571	29.0286	33.8	30.7714	31.5429
DNA-Mitochondrion-2019-03-15.one_line	241606731	125	5	ACGTN_12344	2625	26.019	24	27.8095	29.2571	35.619	31.2381	32.4571
DNA-NCBI-Virus-Complete-Nucleotide-Human-2020-05-11.one_line	470877038	125	5	ACGTN_12344	2125	25.5529	20.4235	26.7294	28.0941	33.9765	27.7647	29.3647
DNA-Genome-Astrammina-rara-GCA_000211355.2-2011-04-27.one_line	1362918	125	5	ACGTN_12344	500	36	28.6	41.2	38.6	70.2	49.4	56
DNA-Genome-Chondrus-crispus-GCA_000350225.2-2013-05-22.one_line	77592685	125	5	ACGTN_12344	250	44.8	32.8	54.4	45.2	104.8	63.6	76.8
DNA-Genome-Salpingoeca-rosetta-GCA_000188695.1-2011-02-10.one_line	37299580	125	5	ACGTN_12344	125	62.4	40.8	81.6	67.2	161.6	78.4	102.4
DNA-Genome-Picea-abies-GCA_900067695.1-2016-11-09.one_line	11960690255	150	5	ACGTN_12344	94500	22.927	22.3545	23.4899	25.7037	23.4423	23.1619	23.1365
DNA-Influenza-2019-04-27.one_line	1106180040	150	5	ACGTN_12344	5250	23.6	19.4667	24.1524	25.4286	25.6571	23.4095	24.0762
DNA-Genome-Strongylocentrotus-purpuratus-GCF_000002235.4-2015-03-10.one_line	659082267	150	5	ACGTN_12344	4800	26.3542	26.9375	28.2083	30.1042	34.9375	32.7708	33.5
DNA-Helicobacter-2019-04-24.one_line	2711601413	150	5	ACGTN_12344	3450	24.4058	24.1739	25.913	27.971	32.1739	29.3043	30.1449
DNA-NCBI-Virus-Complete-Nucleotide-Human-2020-05-11.one_line	470877038	150	5	ACGTN_12344	2400	25.7917	22.2917	27.1667	28.4167	34.6667	28.9583	30.3333
DNA-Mitochondrion-2019-03-15.one_line	241606731	150	5	ACGTN_12344	2400	26.4583	24.125	28	29.5	35.5833	30.9167	32.3333
DNA-Genome-Chondrus-crispus-GCA_000350225.2-2013-05-22.one_line	77592685	150	5	ACGTN_12344	450	37.7778	30.6667	42.6667	40.8889	74.4444	51.3333	58.6667
DNA-Genome-Salpingoeca-rosetta-GCA_000188695.1-2011-02-10.one_line	37299580	150	5	ACGTN_12344	150	57.3333	43.3333	72	61.3333	141.333	72	93.3333
DNA-Genome-Astrammina-rara-GCA_000211355.2-2011-04-27.one_line	1362918	150	5	ACGTN_12344	150	54.6667	36	73.3333	60.6667	146	76.6667	98.6667
DNA-Genome-Picea-abies-GCA_900067695.1-2016-11-09.one_line	11960690255	250	5	ACGTN_12344	86250	23.2359	23.1664	23.8122	26.0835	24.1809	23.709	23.8145
DNA-Helicobacter-2019-04-24.one_line	2711601413	250	5	ACGTN_12344	6750	22.9185	23.0074	23.8519	25.9556	27.4222	25.8222	26.2519
DNA-Genome-Strongylocentrotus-purpuratus-GCF_000002235.4-2015-03-10.one_line	659082267	250	5	ACGTN_12344	4250	25.0353	24.8941	26.4471	28.4	32.4	30.1882	30.5882
DNA-Influenza-2019-04-27.one_line	1106180040	250	5	ACGTN_12344	3000	24.5667	20.3	24.8667	26.5667	28.7	25.4333	26.4
DNA-Mitochondrion-2019-03-15.one_line	241606731	250	5	ACGTN_12344	2250	27.2	24.8444	29.0667	30.5778	36.9778	32.3111	33.7778
DNA-NCBI-Virus-Complete-Nucleotide-Human-2020-05-11.one_line	470877038	250	5	ACGTN_12344	2000	25.55	22.5	27.3	29.15	35.4	30.1	31.8
DNA-Genome-Astrammina-rara-GCA_000211355.2-2011-04-27.one_line	1362918	250	5	ACGTN_12344	250	45.2	32.8	56	48.4	105.6	64	76.8
DNA-Genome-Picea-abies-GCA_900067695.1-2016-11-09.one_line	11960690255	500	5	ACGTN_12344	66000	23.2576	23.5848	23.8394	26.1197	24.4136	24.0167	24.1636
DNA-Helicobacter-2019-04-24.one_line	2711601413	500	5	ACGTN_12344	6000	21.3333	19.1167	21.9667	23.5	23.6833	21.9167	22.4667
DNA-Genome-Strongylocentrotus-purpuratus-GCF_000002235.4-2015-03-10.one_line	659082267	500	5	ACGTN_12344	4500	23.0444	21.7333	23.6889	25.7556	29.2667	26.3111	27.0222
DNA-NCBI-Virus-Complete-Nucleotide-Human-2020-05-11.one_line	470877038	500	5	ACGTN_12344	2000	24.55	19.1	24.8	27.05	30.8	25.3	27
DNA-Mitochondrion-2019-03-15.one_line	241606731	500	5	ACGTN_12344	1500	28.2667	27	30.8	33.0667	44.8	38.0667	40
DNA-Influenza-2019-04-27.one_line	1106180040	500	5	ACGTN_12344	1000	21.7	11	21.8	21.8	29.2	18.9	22
DNA-Genome-Picea-abies-GCA_900067695.1-2016-11-09.one_line	11960690255	750	5	ACGTN_12344	48750	23.1138	23.2513	23.6103	25.8256	24.1538	23.6062	23.8523
DNA-Helicobacter-2019-04-24.one_line	2711601413	750	5	ACGTN_12344	5250	21.2381	19.3333	21.8286	23.4095	24.2095	22.1714	22.7048
DNA-Genome-Strongylocentrotus-purpuratus-GCF_000002235.4-2015-03-10.one_line	659082267	750	5	ACGTN_12344	3750	23.1467	21.7867	23.7867	25.84	28.9867	26.3467	26.88
DNA-NCBI-Virus-Complete-Nucleotide-Human-2020-05-11.one_line	470877038	750	5	ACGTN_12344	1500	26.2	21.2	27.4667	29.4	36.8	29.4	31.7333
DNA-Influenza-2019-04-27.one_line	1106180040	750	5	ACGTN_12344	750	24.9333	13.0667	25.8667	25.2	35.2	21.3333	25.6
DNA-Mitochondrion-2019-03-15.one_line	241606731	750	5	ACGTN_12344	750	32.2667	29.2	35.7333	35.6	58.6667	44.4	49.0667
DNA-Genome-Picea-abies-GCA_900067695.1-2016-11-09.one_line	11960690255	1000	5	ACGTN_12344	38000	23.5395	24.0895	24.1474	26.5289	25.3526	24.9447	25.0632
DNA-Helicobacter-2019-04-24.one_line	2711601413	1000	5	ACGTN_12344	5000	21.58	19.46	22	23.7	23.9	22.08	22.48
DNA-Genome-Strongylocentrotus-purpuratus-GCF_000002235.4-2015-03-10.one_line	659082267	1000	5	ACGTN_12344	4000	21.7	20.525	22.45	24.5	27.375	24.6	25.3
DNA-NCBI-Virus-Complete-Nucleotide-Human-2020-05-11.one_line	470877038	1000	5	ACGTN_12344	1000	28.7	27	31.2	32	48.5	37.9	41.2
DNA-Genome-Picea-abies-GCA_900067695.1-2016-11-09.one_line	11960690255	25	5	ACGTN_22233	289600	25.7189	27.5805	26.5021	28.8947	28.1948	28.3032	28.1809
DNA-Genome-Strongylocentrotus-purpuratus-GCF_000002235.4-2015-03-10.one_line	659082267	25	5	ACGTN_22233	104250	26.5871	27.9367	27.4993	29.8849	30.1161	30.1103	30.0585
DNA-Influenza-2019-04-27.one_line	1106180040	25	5	ACGTN_22233	18450	26.3415	25.5068	27.3496	28.9377	29.1707	28.6938	28.813
DNA-NCBI-Virus-Complete-Nucleotide-Human-2020-05-11.one_line	470877038	25	5	ACGTN_22233	10350	26.4251	23.7391	27.6329	28.9179	29.6618	28.3285	28.715
DNA-Helicobacter-2019-04-24.one_line	2711601413	25	5	ACGTN_22233	6025	27.5851	28.4813	29.6432	31.3693	35.0207	33.5436	33.8589
DNA-Genome-Salpingoeca-rosetta-GCA_000188695.1-2011-02-10.one_line	37299580	25	5	ACGTN_22233	4175	27.3054	28.8383	29.5569	30.7545	36.9102	34.3952	35.2575
DNA-Mitochondrion-2019-03-15.one_line	241606731	25	5	ACGTN_22233	3200	29.1875	27.875	31.4375	32.4063	39.5625	36.0938	37.125
DNA-Genome-Chondrus-crispus-GCA_000350225.2-2013-05-22.one_line	77592685	25	5	ACGTN_22233	2525	28.8713	29.2673	31.5248	32.6733	41.2277	37.1485	38.495
DNA-Genome-Astrammina-rara-GCA_000211355.2-2011-04-27.one_line	1362918	25	5	ACGTN_22233	1400	32.1429	28.8571	35.2857	35.0714	50.4286	43.0714	45.4286
DNA-Genome-Fusarium-graminearum-PH-1-GCF_000240135.3-2008-11-21.one_line	34133023	25	5	ACGTN_22233	375	42.4	36.2667	48.5333	42.6667	84.2667	56.5333	65.0667
DNA-Genome-Spironucleus-salmonicida-GCA_000497125.1-2013-11-19.one_line	9934367	25	5	ACGTN_22233	225	50.6667	37.3333	60.4444	52.4444	112.444	66.2222	81.7778
DNA-Genome-WS1-bacterium-JGI-0000059-K21-GCA_000398605.1-2013-05-16.one_line	509551	25	5	ACGTN_22233	125	64	40.8	84.8	66.4	171.2	88	112
DNA-Genome-Cryptosporidium-parvum-Iowa-II-GCA_000165345.1-2007-02-26.one_line	7012512	25	5	ACGTN_22233	25	160	104	284	212	640	220	336
DNA-Genome-Picea-abies-GCA_900067695.1-2016-11-09.one_line	11960690255	50	5	ACGTN_22233	698800	24.007	25.2577	24.5146	26.8052	25.0585	25.077	25.0321
DNA-Genome-Strongylocentrotus-purpuratus-GCF_000002235.4-2015-03-10.one_line	659082267	50	5	ACGTN_22233	200800	25.4562	27.4791	26.2052	28.7271	28.5817	28.5115	28.6175
DNA-Influenza-2019-04-27.one_line	1106180040	50	5	ACGTN_22233	36050	23.853	21.5118	24.3273	26.0499	23.6255	22.7795	23.0014
DNA-NCBI-Virus-Complete-Nucleotide-Human-2020-05-11.one_line	470877038	50	5	ACGTN_22233	21400	24.8598	21.8925	25.4953	26.8224	25.8271	24.6916	24.7664
DNA-Genome-Salpingoeca-rosetta-GCA_000188695.1-2011-02-10.one_line	37299580	50	5	ACGTN_22233	13200	24.9318	27.3788	26.2879	28.1288	30.6136	30.1591	30.0909
DNA-Helicobacter-2019-04-24.one_line	2711601413	50	5	ACGTN_22233	12150	25.4979	27.0947	26.8807	29.1687	30.8148	29.8107	29.9918
DNA-Mitochondrion-2019-03-15.one_line	241606731	50	5	ACGTN_22233	6150	27.1545	25.9675	28.5854	30.0976	33.3984	31.2358	31.7398
DNA-Genome-Chondrus-crispus-GCA_000350225.2-2013-05-22.one_line	77592685	50	5	ACGTN_22233	5750	25.913	27.8783	27.5826	29.6	34.1043	32.5913	32.9043
DNA-Genome-Astrammina-rara-GCA_000211355.2-2011-04-27.one_line	1362918	50	5	ACGTN_22233	3000	28.8	28.1667	31	31.9	39.5667	36.1667	37.0667
DNA-Genome-Fusarium-graminearum-PH-1-GCF_000240135.3-2008-11-21.one_line	34133023	50	5	ACGTN_22233	1100	31.4545	30.4545	34.3636	34.7273	51.2727	41.7273	44.7273
DNA-Genome-Spironucleus-salmonicida-GCA_000497125.1-2013-11-19.one_line	9934367	50	5	ACGTN_22233	550	36.5455	31.4545	40	38.9091	66.1818	47.2727	53.0909
DNA-Genome-WS1-bacterium-JGI-0000059-K21-GCA_000398605.1-2013-05-16.one_line	509551	50	5	ACGTN_22233	250	47.2	34	56.8	48	107.2	65.6	78.4
DNA-Genome-Picea-abies-GCA_900067695.1-2016-11-09.one_line	11960690255	100	5	ACGTN_22233	1070000	23.4421	23.0775	23.7357	26.0581	22.8216	22.7842	22.7634
DNA-Genome-Strongylocentrotus-purpuratus-GCF_000002235.4-2015-03-10.one_line	659082267	100	5	ACGTN_22233	312900	24.6242	26.6964	25.2579	27.5059	27.3017	27.3704	27.2943
DNA-Influenza-2019-04-27.one_line	1106180040	100	5	ACGTN_22233	73600	20.3641	16.1753	20.4728	21.8478	17.9253	16.6223	16.5543
DNA-NCBI-Virus-Complete-Nucleotide-Human-2020-05-11.one_line	470877038	100	5	ACGTN_22233	44100	22.7528	18.2132	22.78	24.4853	21.0612	19.8186	19.8186
DNA-Genome-Salpingoeca-rosetta-GCA_000188695.1-2011-02-10.one_line	37299580	100	5	ACGTN_22233	32600	23.7239	26.2086	24.6012	26.6258	28.1104	27.8466	27.816
DNA-Helicobacter-2019-04-24.one_line	2711601413	100	5	ACGTN_22233	22100	24.4344	26.4977	25.4118	27.6199	28.4661	28.1855	28.1629
DNA-Genome-Chondrus-crispus-GCA_000350225.2-2013-05-22.one_line	77592685	100	5	ACGTN_22233	14100	24.2057	26.2553	25.2766	27.3617	29.7518	29.3475	29.1915
DNA-Mitochondrion-2019-03-15.one_line	241606731	100	5	ACGTN_22233	9600	25.1667	24.4271	26.125	27.7813	29.4792	27.8854	28.3333
DNA-Genome-Astrammina-rara-GCA_000211355.2-2011-04-27.one_line	1362918	100	5	ACGTN_22233	5100	27.4314	27.8627	29.098	30.1765	35.5882	33.6471	34.1176
DNA-Genome-Fusarium-graminearum-PH-1-GCF_000240135.3-2008-11-21.one_line	34133023	100	5	ACGTN_22233	2400	26.75	26.9167	28.5	30	39.2083	35.0833	35.8333
DNA-Genome-Spironucleus-salmonicida-GCA_000497125.1-2013-11-19.one_line	9934367	100	5	ACGTN_22233	2000	27.9	28.35	29.9	31.7	41.25	36.05	37.8
DNA-Genome-WS1-bacterium-JGI-0000059-K21-GCA_000398605.1-2013-05-16.one_line	509551	100	5	ACGTN_22233	300	43.6667	33	51.3333	45.3333	96	61.6667	72
DNA-Genome-Cryptosporidium-parvum-Iowa-II-GCA_000165345.1-2007-02-26.one_line	7012512	100	5	ACGTN_22233	100	71	44	96	71	235	98	128
DNA-Genome-Picea-abies-GCA_900067695.1-2016-11-09.one_line	11960690255	125	5	ACGTN_22233	1150375	23.3288	22.7118	23.577	25.9262	22.378	22.373	22.3478
DNA-Genome-Strongylocentrotus-purpuratus-GCF_000002235.4-2015-03-10.one_line	659082267	125	5	ACGTN_22233	361500	24.2501	26.3663	24.8194	27.062	27.0534	27.034	26.9422
DNA-Influenza-2019-04-27.one_line	1106180040	125	5	ACGTN_22233	82750	19.6012	15.2556	19.7221	21.0574	16.6296	15.6918	15.6181
DNA-NCBI-Virus-Complete-Nucleotide-Human-2020-05-11.one_line	470877038	125	5	ACGTN_22233	54125	22.0212	17.1141	21.9381	23.6471	19.5289	18.4776	18.4905
DNA-Genome-Salpingoeca-rosetta-GCA_000188695.1-2011-02-10.one_line	37299580	125	5	ACGTN_22233	41750	23.418	25.9401	24.1868	26.1293	27.5401	27.1689	27.2862
DNA-Helicobacter-2019-04-24.one_line	2711601413	125	5	ACGTN_22233	30250	23.3983	24.4066	24.1124	26.2545	26.0132	25.5438	25.5339
DNA-Genome-Chondrus-crispus-GCA_000350225.2-2013-05-22.one_line	77592685	125	5	ACGTN_22233	16750	24.0119	26.2567	24.9672	27.1104	29.397	28.603	28.6567
DNA-Mitochondrion-2019-03-15.one_line	241606731	125	5	ACGTN_22233	9750	25.2718	24.1128	26.1744	27.7538	28.9949	27.7538	27.9795
DNA-Genome-Astrammina-rara-GCA_000211355.2-2011-04-27.one_line	1362918	125	5	ACGTN_22233	8500	26.7529	27.8941	28.0706	29.4353	33.0941	31.7765	32.1412
DNA-Genome-Fusarium-graminearum-PH-1-GCF_000240135.3-2008-11-21.one_line	34133023	125	5	ACGTN_22233	4125	25.6	26.9333	27.103	28.897	34.6909	32.4848	32.7758
DNA-Genome-Spironucleus-salmonicida-GCA_000497125.1-2013-11-19.one_line	9934367	125	5	ACGTN_22233	3625	25.1034	25.931	26.5379	27.9172	34.9143	31.7793	32.7724
DNA-Genome-WS1-bacterium-JGI-0000059-K21-GCA_000398605.1-2013-05-16.one_line	509551	125	5	ACGTN_22233	500	36.6	30	41.6	38	71.8	51	57.6
DNA-Genome-Cryptosporidium-parvum-Iowa-II-GCA_000165345.1-2007-02-26.one_line	7012512	125	5	ACGTN_22233	125	64	40.8	83.2	67.2	171.2	88	112
DNA-Genome-Picea-abies-GCA_900067695.1-2016-11-09.one_line	11960690255	150	5	ACGTN_22233	1191450	23.3173	22.6724	23.5641	25.8885	22.2714	22.2664	22.226
DNA-Genome-Strongylocentrotus-purpuratus-GCF_000002235.4-2015-03-10.one_line	659082267	150	5	ACGTN_22233	661050	23.1439	25.4383	23.594	25.7221	25.4465	25.6587	25.494
DNA-Influenza-2019-04-27.one_line	1106180040	150	5	ACGTN_22233	97800	18.6431	13.9479	18.589	19.8763	14.7413	14.1789	14.1677
DNA-NCBI-Virus-Complete-Nucleotide-Human-2020-05-11.one_line	470877038	150	5	ACGTN_22233	66900	21.2392	16.5396	21.0553	22.7339	18.9283	17.6203	17.6323
DNA-Genome-Salpingoeca-rosetta-GCA_000188695.1-2011-02-10.one_line	37299580	150	5	ACGTN_22233	54150	23.2188	25.8467	23.9261	25.952	27.5402	27.0286	26.9991
DNA-Helicobacter-2019-04-24.one_line	2711601413	150	5	ACGTN_22233	33750	23.4311	24.2578	24.0059	26.2607	25.8607	25.3867	25.3274
DNA-Genome-Chondrus-crispus-GCA_000350225.2-2013-05-22.one_line	77592685	150	5	ACGTN_22233	23250	23.9398	26.2495	24.7742	27.0624	28.9462	28.271	28.2667
DNA-Mitochondrion-2019-03-15.one_line	241606731	150	5	ACGTN_22233	10650	25.0235	23.7746	25.8216	27.3052	28.4977	27.0329	27.23
DNA-Genome-Astrammina-rara-GCA_000211355.2-2011-04-27.one_line	1362918	150	5	ACGTN_22233	8400	26.6429	27.7024	27.9524	29.3214	33.0952	31.8571	32.1905
DNA-Genome-Spironucleus-salmonicida-GCA_000497125.1-2013-11-19.one_line	9934367	150	5	ACGTN_22233	4200	25.2619	26.2619	26.7619	28.381	32.7429	31.9762	32.4762
DNA-Genome-Fusarium-graminearum-PH-1-GCF_000240135.3-2008-11-21.one_line	34133023	150	5	ACGTN_22233	3900	25.5385	27	27.1282	28.641	35.5897	32.8974	33.4359
DNA-Genome-WS1-bacterium-JGI-0000059-K21-GCA_000398605.1-2013-05-16.one_line	509551	150	5	ACGTN_22233	1050	31.0476	28.6667	33.7143	33.4286	51.8095	41.8095	44.9524
DNA-Genome-Cryptosporidium-parvum-Iowa-II-GCA_000165345.1-2007-02-26.one_line	7012512	150	5	ACGTN_22233	150	58.6667	39.3333	73.3333	58.6667	150.667	81.3333	104
DNA-Genome-Picea-abies-GCA_900067695.1-2016-11-09.one_line	11960690255	250	5	ACGTN_22233	1288500	23.2697	22.5218	23.4912	25.8119	21.8311	21.8368	21.7962
DNA-Genome-Strongylocentrotus-purpuratus-GCF_000002235.4-2015-03-10.one_line	659082267	250	5	ACGTN_22233	742250	23.5123	25.6069	23.8965	25.9888	25.5085	25.4999	25.4523
DNA-Influenza-2019-04-27.one_line	1106180040	250	5	ACGTN_22233	150750	16.13	11.1589	15.8395	17.0932	11.5788	11.3008	11.1867
DNA-NCBI-Virus-Complete-Nucleotide-Human-2020-05-11.one_line	470877038	250	5	ACGTN_22233	108750	19.691	14.1039	19.0106	20.8671	15.2184	14.7908	14.7347
DNA-Genome-Salpingoeca-rosetta-GCA_000188695.1-2011-02-10.one_line	37299580	250	5	ACGTN_22233	99750	22.7108	25.2531	23.2902	25.2872	25.998	25.7855	25.9048
DNA-Genome-Chondrus-crispus-GCA_000350225.2-2013-05-22.one_line	77592685	250	5	ACGTN_22233	41000	23.3366	25.7268	23.9463	26.0634	27.3537	27.0854	26.9951
DNA-Helicobacter-2019-04-24.one_line	2711601413	250	5	ACGTN_22233	40500	23.4025	24.637	23.7086	26.2963	26.0395	25.4	25.4222
DNA-Mitochondrion-2019-03-15.one_line	241606731	250	5	ACGTN_22233	13250	24.0528	21.2906	24.1962	26.0151	24.7698	23.3434	23.7585
DNA-Genome-Astrammina-rara-GCA_000211355.2-2011-04-27.one_line	1362918	250	5	ACGTN_22233	10750	26.2605	27.6558	27.293	29.014	31.7209	30.7628	31.0326
DNA-Genome-Spironucleus-salmonicida-GCA_000497125.1-2013-11-19.one_line	9934367	250	5	ACGTN_22233	8750	24.2629	25.5657	24.8457	26.9943	31.2387	28.88	28.8914
DNA-Genome-Fusarium-graminearum-PH-1-GCF_000240135.3-2008-11-21.one_line	34133023	250	5	ACGTN_22233	6500	24.5846	25.9846	25.6308	27.2769	31.9231	30.1846	30.4
DNA-Genome-WS1-bacterium-JGI-0000059-K21-GCA_000398605.1-2013-05-16.one_line	509551	250	5	ACGTN_22233	2000	28.1	27.9	30.2	30.75	41.65	36.8	38.2
DNA-Genome-Picea-abies-GCA_900067695.1-2016-11-09.one_line	11960690255	500	5	ACGTN_22233	1384500	23.0651	22.0665	23.2582	25.6203	21.0737	21.0924	21.0196
DNA-Genome-Strongylocentrotus-purpuratus-GCF_000002235.4-2015-03-10.one_line	659082267	500	5	ACGTN_22233	741500	23.7764	25.4456	24.0399	26.1289	25.1226	25.2966	25.0751
DNA-Genome-Salpingoeca-rosetta-GCA_000188695.1-2011-02-10.one_line	37299580	500	5	ACGTN_22233	259000	22.0629	24.5131	22.4718	24.4927	24.5656	24.6259	24.349
DNA-Influenza-2019-04-27.one_line	1106180040	500	5	ACGTN_22233	199000	13.5925	8.5437	13.2312	14.2829	8.8603	8.7302	8.5548
DNA-NCBI-Virus-Complete-Nucleotide-Human-2020-05-11.one_line	470877038	500	5	ACGTN_22233	188000	17.9548	11.8569	17.0053	18.8718	12.5798	12.4149	12.2681
DNA-Genome-Chondrus-crispus-GCA_000350225.2-2013-05-22.one_line	77592685	500	5	ACGTN_22233	120000	22.8025	25.1942	23.27	25.3983	25.7275	25.815	25.7033
DNA-Helicobacter-2019-04-24.one_line	2711601413	500	5	ACGTN_22233	87500	23.1726	24.7589	23.4011	26.0949	25.0114	24.8114	24.704
DNA-Mitochondrion-2019-03-15.one_line	241606731	500	5	ACGTN_22233	22500	23.3467	19.8711	23.5467	25.1156	22.28	21.5244	21.8489
DNA-Genome-Astrammina-rara-GCA_000211355.2-2011-04-27.one_line	1362918	500	5	ACGTN_22233	16000	25.8688	27.7438	26.6	28.2125	30.5375	30.1313	30.025
DNA-Genome-Spironucleus-salmonicida-GCA_000497125.1-2013-11-19.one_line	9934367	500	5	ACGTN_22233	15500	24.3355	25.8452	24.8129	26.8645	28.7313	27.8	27.7161
DNA-Genome-Fusarium-graminearum-PH-1-GCF_000240135.3-2008-11-21.one_line	34133023	500	5	ACGTN_22233	11000	23.6545	25.6636	24.4182	26.1182	29.2091	28.3909	28.2182
DNA-Genome-WS1-bacterium-JGI-0000059-K21-GCA_000398605.1-2013-05-16.one_line	509551	500	5	ACGTN_22233	6000	25.5333	27.3833	26.7333	28.4667	32.5833	31.5667	31.4
DNA-Genome-Picea-abies-GCA_900067695.1-2016-11-09.one_line	11960690255	750	5	ACGTN_22233	1303500	23.0341	21.9622	23.2112	25.5546	20.8175	20.8499	20.7985
DNA-Genome-Salpingoeca-rosetta-GCA_000188695.1-2011-02-10.one_line	37299580	750	5	ACGTN_22233	670500	21.799	24.2	22.1378	24.089	23.728	23.7684	23.5997
DNA-Genome-Strongylocentrotus-purpuratus-GCF_000002235.4-2015-03-10.one_line	659082267	750	5	ACGTN_22233	633750	23.9071	25.2964	24.1281	26.1674	25.3644	25.2508	24.9657
DNA-Genome-Chondrus-crispus-GCA_000350225.2-2013-05-22.one_line	77592685	750	5	ACGTN_22233	339750	22.2787	24.6275	22.6896	24.7953	24.5795	24.7856	24.3897
DNA-Influenza-2019-04-27.one_line	1106180040	750	5	ACGTN_22233	232500	12.6856	7.748	12.252	13.28	8.0082	7.957	7.7523
DNA-NCBI-Virus-Complete-Nucleotide-Human-2020-05-11.one_line	470877038	750	5	ACGTN_22233	230250	18.1807	11.8202	17.2586	19.1522	12.4526	12.2693	12.2041
DNA-Helicobacter-2019-04-24.one_line	2711601413	750	5	ACGTN_22233	103500	23.0783	24.9082	22.8039	25.9227	24.8386	24.687	24.5758
DNA-Genome-Fusarium-graminearum-PH-1-GCF_000240135.3-2008-11-21.one_line	34133023	750	5	ACGTN_22233	27750	22.4649	24.7676	23.0126	24.7063	26.5874	26.2919	26.0757
DNA-Mitochondrion-2019-03-15.one_line	241606731	750	5	ACGTN_22233	26250	22.6819	18.781	22.6819	24.3619	21.059	20.4495	20.6324
DNA-Genome-Spironucleus-salmonicida-GCA_000497125.1-2013-11-19.one_line	9934367	750	5	ACGTN_22233	21750	24.3908	25.8529	24.7908	26.869	27.531	27.3103	27.3471
DNA-Genome-Astrammina-rara-GCA_000211355.2-2011-04-27.one_line	1362918	750	5	ACGTN_22233	15750	25.8032	27.9048	26.5143	28.2159	30.5079	30.2222	30.0698
DNA-Genome-WS1-bacterium-JGI-0000059-K21-GCA_000398605.1-2013-05-16.one_line	509551	750	5	ACGTN_22233	7500	25.28	27.48	26.4	28.0533	31.56	30.9467	30.6133
DNA-Genome-Picea-abies-GCA_900067695.1-2016-11-09.one_line	11960690255	1000	5	ACGTN_22233	1297000	22.8167	21.3119	22.9689	25.3604	20.1501	20.1194	20.0981
DNA-Genome-Salpingoeca-rosetta-GCA_000188695.1-2011-02-10.one_line	37299580	1000	5	ACGTN_22233	963000	22.186	24.7202	22.5067	24.5272	23.943	24.0396	23.9531
DNA-Genome-Strongylocentrotus-purpuratus-GCF_000002235.4-2015-03-10.one_line	659082267	1000	5	ACGTN_22233	528000	23.9638	25.3491	24.1447	26.2438	25.1648	25.2153	25.1727
DNA-Genome-Chondrus-crispus-GCA_000350225.2-2013-05-22.one_line	77592685	1000	5	ACGTN_22233	511000	22.6114	24.7127	22.9444	25.0838	24.3777	24.5477	24.3781
DNA-NCBI-Virus-Complete-Nucleotide-Human-2020-05-11.one_line	470877038	1000	5	ACGTN_22233	304000	17.1145	10.9112	16.3	17.9671	11.4421	11.302	11.2368
DNA-Influenza-2019-04-27.one_line	1106180040	1000	5	ACGTN_22233	202000	13.0149	7.4624	12.3663	13.6535	7.6757	7.6114	7.4178
DNA-Helicobacter-2019-04-24.one_line	2711601413	1000	5	ACGTN_22233	127000	23.0858	24.1693	22.737	25.8244	23.8835	23.8654	23.7638
DNA-Genome-Fusarium-graminearum-PH-1-GCF_000240135.3-2008-11-21.one_line	34133023	1000	5	ACGTN_22233	41000	22.9098	24.1756	22.922	24.9659	25.6854	25.3317	25.239
DNA-Genome-Spironucleus-salmonicida-GCA_000497125.1-2013-11-19.one_line	9934367	1000	5	ACGTN_22233	28000	23.6393	26.025	24.2786	26.1893	27.976	27.1214	27.1857
DNA-Mitochondrion-2019-03-15.one_line	241606731	1000	5	ACGTN_22233	26000	21.8231	17.4731	21.5692	23.3269	19.8	18.9962	19.3231
DNA-Genome-Astrammina-rara-GCA_000211355.2-2011-04-27.one_line	1362918	1000	5	ACGTN_22233	14000	25.8643	27.9143	26.6143	28.3	30.6643	30.3429	30.1714
DNA-Genome-WS1-bacterium-JGI-0000059-K21-GCA_000398605.1-2013-05-16.one_line	509551	1000	5	ACGTN_22233	9000	25.2111	27.3778	26.2667	27.9667	31.0556	30.4444	30.2667
DNA-Genome-Salpingoeca-rosetta-GCA_000188695.1-2011-02-10.one_line	37299580	2500	5	ACGTN_22233	2290000	22.7505	25.2729	23.0061	25.2296	24.1409	24.2139	24.1628
DNA-Genome-Chondrus-crispus-GCA_000350225.2-2013-05-22.one_line	77592685	2500	5	ACGTN_22233	1535000	23.2846	24.9803	23.5386	25.7816	24.2919	24.5171	24.3247
DNA-Genome-Picea-abies-GCA_900067695.1-2016-11-09.one_line	11960690255	2500	5	ACGTN_22233	842500	21.6177	19.7294	21.7759	23.6567	18.582	18.5938	18.5809
DNA-NCBI-Virus-Complete-Nucleotide-Human-2020-05-11.one_line	470877038	2500	5	ACGTN_22233	620000	15.8842	9.7439	15.1081	16.5713	10.0477	9.999	9.8658
DNA-Genome-Strongylocentrotus-purpuratus-GCF_000002235.4-2015-03-10.one_line	659082267	2500	5	ACGTN_22233	285000	23.6102	23.454	23.4491	25.6046	23.5758	23.5856	23.6744
DNA-Helicobacter-2019-04-24.one_line	2711601413	2500	5	ACGTN_22233	202500	23.3694	24.8306	22.8859	26.1644	24.2805	24.2217	24.0652
DNA-Influenza-2019-04-27.one_line	1106180040	2500	5	ACGTN_22233	142500	10.3396	5.3881	9.1284	10.7067	5.8646	5.753	5.6898
DNA-Genome-Fusarium-graminearum-PH-1-GCF_000240135.3-2008-11-21.one_line	34133023	2500	5	ACGTN_22233	82500	23.583	26.1709	23.9636	25.7782	26.8218	26.5564	26.5406
DNA-Genome-Spironucleus-salmonicida-GCA_000497125.1-2013-11-19.one_line	9934367	2500	5	ACGTN_22233	45000	24.3711	26.2733	24.4622	26.7822	26.2225	26.8689	26.6933
DNA-Mitochondrion-2019-03-15.one_line	241606731	2500	5	ACGTN_22233	20000	24.8	23.105	25.14	26.84	25.535	24.96	25.2
DNA-Genome-WS1-bacterium-JGI-0000059-K21-GCA_000398605.1-2013-05-16.one_line	509551	2500	5	ACGTN_22233	20000	24.57	27.27	25.33	27.285	28.9	28.675	28.58
DNA-Genome-Astrammina-rara-GCA_000211355.2-2011-04-27.one_line	1362918	2500	5	ACGTN_22233	7500	26.2933	28.36	27.2533	28.7733	32.6933	31.84	31.7333
DNA-Genome-Salpingoeca-rosetta-GCA_000188695.1-2011-02-10.one_line	37299580	5000	5	ACGTN_22233	4280000	22.9091	25.3811	23.1286	25.4321	24.0542	24.1087	24.0797
DNA-Genome-Chondrus-crispus-GCA_000350225.2-2013-05-22.one_line	77592685	5000	5	ACGTN_22233	3180000	23.5471	24.9558	23.7237	26.0161	24.1358	24.1475	24.1691
DNA-NCBI-Virus-Complete-Nucleotide-Human-2020-05-11.one_line	470877038	5000	5	ACGTN_22233	825000	15.0234	9.0304	14.4451	15.5522	9.2776	9.1959	9.1636
DNA-Genome-Picea-abies-GCA_900067695.1-2016-11-09.one_line	11960690255	5000	5	ACGTN_22233	410000	20.7695	18.7824	20.9176	22.759	17.9427	17.9973	17.9093
DNA-Helicobacter-2019-04-24.one_line	2711601413	5000	5	ACGTN_22233	290000	23.4072	24.6045	23.0152	26.2052	23.6793	23.6545	23.5821
DNA-Influenza-2019-04-27.one_line	1106180040	5000	5	ACGTN_22233	200000	7.92	4.0025	7.038	8.111	4.4065	4.3525	4.298
DNA-Genome-Fusarium-graminearum-PH-1-GCF_000240135.3-2008-11-21.one_line	34133023	5000	5	ACGTN_22233	145000	23.909	26.7483	24.1959	26.1386	26.6517	26.7469	26.6428
DNA-Genome-Strongylocentrotus-purpuratus-GCF_000002235.4-2015-03-10.one_line	659082267	5000	5	ACGTN_22233	110000	22.1145	20.1964	21.9236	23.71	20.8673	20.8964	20.8109
DNA-Genome-Spironucleus-salmonicida-GCA_000497125.1-2013-11-19.one_line	9934367	5000	5	ACGTN_22233	65000	22.9877	24.2015	23.2338	25.2354	25.1033	24.9123	24.8246
DNA-Genome-WS1-bacterium-JGI-0000059-K21-GCA_000398605.1-2013-05-16.one_line	509551	5000	5	ACGTN_22233	45000	24.3422	27.2622	24.9333	27.0867	27.8511	27.7511	27.6978
DNA-Mitochondrion-2019-03-15.one_line	241606731	5000	5	ACGTN_22233	10000	25.69	27.78	26.48	28.27	30.5	29.77	29.8
DNA-Genome-Salpingoeca-rosetta-GCA_000188695.1-2011-02-10.one_line	37299580	10000	5	ACGTN_22233	7639580	22.9957	25.5412	23.229	25.5608	24.0215	24.1423	24.0979
DNA-Genome-Chondrus-crispus-GCA_000350225.2-2013-05-22.one_line	77592685	10000	5	ACGTN_22233	6590000	23.7897	24.4442	23.9129	26.3165	23.4316	23.5562	23.4837
DNA-NCBI-Virus-Complete-Nucleotide-Human-2020-05-11.one_line	470877038	10000	5	ACGTN_22233	1250000	14.1062	8.4777	13.5184	16.5212	8.6268	8.6025	8.543
DNA-Genome-Fusarium-graminearum-PH-1-GCF_000240135.3-2008-11-21.one_line	34133023	10000	5	ACGTN_22233	310000	24.3048	27.2894	24.5955	26.6135	26.8423	26.7406	26.6994
DNA-Helicobacter-2019-04-24.one_line	2711601413	10000	5	ACGTN_22233	250000	23.3524	24.016	23.124	26.0988	23.1796	23.3456	23.1744
DNA-Influenza-2019-04-27.one_line	1106180040	10000	5	ACGTN_22233	250000	6.4908	3.26	5.712	6.5852	3.6208	3.5876	3.5456
DNA-Genome-Picea-abies-GCA_900067695.1-2016-11-09.one_line	11960690255	10000	5	ACGTN_22233	160000	19.2481	18.3294	19.4238	21.1381	18.4681	18.5475	18.35
DNA-Genome-Spironucleus-salmonicida-GCA_000497125.1-2013-11-19.one_line	9934367	10000	5	ACGTN_22233	130000	23.5146	24.0246	23.6431	25.7223	24.2731	24.21	24.1785
DNA-Genome-Strongylocentrotus-purpuratus-GCF_000002235.4-2015-03-10.one_line	659082267	10000	5	ACGTN_22233	90000	22.7356	20.5456	22.5978	24.3522	21.23	21.2689	21.1156
DNA-Genome-WS1-bacterium-JGI-0000059-K21-GCA_000398605.1-2013-05-16.one_line	509551	10000	5	ACGTN_22233	60000	24.23	27.2417	24.7567	26.8783	27.5217	27.4517	27.4133
DNA-Genome-Picea-abies-GCA_900067695.1-2016-11-09.one_line	11960690255	25	5	ACNTG_12344	20675	21.6832	25.0979	23.081	25.9927	26.162	25.7993	25.8283
DNA-Genome-Strongylocentrotus-purpuratus-GCF_000002235.4-2015-03-10.one_line	659082267	25	5	ACNTG_12344	4900	23.9184	25.8163	26.2449	28.898	32.3878	30.449	30.9388
DNA-Helicobacter-2019-04-24.one_line	2711601413	25	5	ACNTG_12344	850	29.4118	28.4706	33.1765	34.3529	50.5882	38.3529	42.3529
DNA-NCBI-Virus-Complete-Nucleotide-Human-2020-05-11.one_line	470877038	25	5	ACNTG_12344	575	26.2609	19.3043	27.8261	26.087	49.7391	28.6957	34.7826
DNA-Influenza-2019-04-27.one_line	1106180040	25	5	ACNTG_12344	300	44	31.3333	50.6667	46.6667	90.6667	56	66.6667
DNA-Mitochondrion-2019-03-15.one_line	241606731	25	5	ACNTG_12344	150	55.3333	36.6667	72	58.6667	140	70.6667	93.3333
DNA-Genome-Salpingoeca-rosetta-GCA_000188695.1-2011-02-10.one_line	37299580	25	5	ACNTG_12344	100	66	43	90	76	189	85	116
DNA-Genome-Chondrus-crispus-GCA_000350225.2-2013-05-22.one_line	77592685	25	5	ACNTG_12344	25	156	88	284	204	640	208	320
DNA-Genome-Fusarium-graminearum-PH-1-GCF_000240135.3-2008-11-21.one_line	34133023	25	5	ACNTG_12344	25	156	96	284	208	640	216	336
DNA-Genome-Picea-abies-GCA_900067695.1-2016-11-09.one_line	11960690255	50	5	ACNTG_12344	17400	19.9655	21.5747	21.1724	23.7759	24.5115	23.6839	23.8621
DNA-Genome-Strongylocentrotus-purpuratus-GCF_000002235.4-2015-03-10.one_line	659082267	50	5	ACNTG_12344	2450	24.0816	24.2857	26.2857	28.898	35.3469	31.2653	32.4898
DNA-Helicobacter-2019-04-24.one_line	2711601413	50	5	ACNTG_12344	1300	25.2308	24.5385	27.3846	29.4615	39.6154	31.6923	34.1538
DNA-Mitochondrion-2019-03-15.one_line	241606731	50	5	ACNTG_12344	250	42.8	34	51.2	47.2	94.8	53.2	67.2
DNA-NCBI-Virus-Complete-Nucleotide-Human-2020-05-11.one_line	470877038	50	5	ACNTG_12344	150	52	40	65.3333	59.3333	132.667	63.3333	85.3333
DNA-Genome-Salpingoeca-rosetta-GCA_000188695.1-2011-02-10.one_line	37299580	50	5	ACNTG_12344	50	100	64	152	122	370	120	176
DNA-Genome-Picea-abies-GCA_900067695.1-2016-11-09.one_line	11960690255	100	5	ACNTG_12344	2900	12.931	12.931	13.7241	14.6207	22.7586	16.8276	17.6552
DNA-Helicobacter-2019-04-24.one_line	2711601413	100	5	ACNTG_12344	1600	21.625	17.6875	22.375	23.8125	31.125	23.625	25.75
DNA-Genome-Strongylocentrotus-purpuratus-GCF_000002235.4-2015-03-10.one_line	659082267	100	5	ACNTG_12344	700	31	27.5714	34.2857	35	55	39.7143	44
DNA-NCBI-Virus-Complete-Nucleotide-Human-2020-05-11.one_line	470877038	100	5	ACNTG_12344	200	44.5	34	54	48	107.5	54	70
DNA-Helicobacter-2019-04-24.one_line	2711601413	125	5	ACNTG_12344	1750	20.9714	18.9143	21.8286	23.4857	31.6571	24.6286	26.5143
DNA-Genome-Picea-abies-GCA_900067695.1-2016-11-09.one_line	11960690255	125	5	ACNTG_12344	875	16.1143	14.4	17.6	16.9143	35.0857	21.8286	23.7714
DNA-Genome-Strongylocentrotus-purpuratus-GCF_000002235.4-2015-03-10.one_line	659082267	125	5	ACNTG_12344	625	29.44	25.44	32.96	33.12	56.96	39.36	44.16
DNA-NCBI-Virus-Complete-Nucleotide-Human-2020-05-11.one_line	470877038	125	5	ACNTG_12344	375	35.2	28.2667	41.0667	40	73.8667	46.1333	55.4667
DNA-Genome-Salpingoeca-rosetta-GCA_000188695.1-2011-02-10.one_line	37299580	125	5	ACNTG_12344	125	60.8	35.2	78.4	64	156	73.6	96
DNA-Helicobacter-2019-04-24.one_line	2711601413	150	5	ACNTG_12344	1500	22.8	21.4667	24.1333	25.6	36.0667	28.2667	30.6667
DNA-Genome-Strongylocentrotus-purpuratus-GCF_000002235.4-2015-03-10.one_line	659082267	150	5	ACNTG_12344	750	28.5333	23.4667	30.6667	29.4667	47.0667	33.2	37.8667
DNA-NCBI-Virus-Complete-Nucleotide-Human-2020-05-11.one_line	470877038	150	5	ACNTG_12344	300	38.6667	29	44.6667	41	82.3333	47.6667	58.6667
DNA-Genome-Strongylocentrotus-purpuratus-GCF_000002235.4-2015-03-10.one_line	659082267	250	5	ACNTG_12344	1250	23.04	20.08	24.16	25.12	35.2	25.92	28.48
DNA-NCBI-Virus-Complete-Nucleotide-Human-2020-05-11.one_line	470877038	250	5	ACNTG_12344	500	30.8	26.8	34.4	34	61.2	39.6	46.4
DNA-Mitochondrion-2019-03-15.one_line	241606731	250	5	ACNTG_12344	250	42	28.4	49.6	46.8	96.8	53.6	67.2
DNA-Genome-Strongylocentrotus-purpuratus-GCF_000002235.4-2015-03-10.one_line	659082267	750	5	ACNTG_12344	750	15.0667	10	16	14.1333	30.6667	14	18.6667
DNA-Genome-Picea-abies-GCA_900067695.1-2016-11-09.one_line	11960690255	25	5	ACNTG_22233	279575	21.5005	25.5473	22.3067	25.1725	24.7873	24.7737	24.7533
DNA-Genome-Strongylocentrotus-purpuratus-GCF_000002235.4-2015-03-10.one_line	659082267	25	5	ACNTG_22233	120825	21.5551	24.8094	22.4324	25.2423	25.6859	25.628	25.5841
DNA-Helicobacter-2019-04-24.one_line	2711601413	25	5	ACNTG_22233	9700	21.9278	24.9072	23.4845	25.7526	28.0206	27.0515	27.299
DNA-Genome-Salpingoeca-rosetta-GCA_000188695.1-2011-02-10.one_line	37299580	25	5	ACNTG_22233	4850	22.8866	26.1031	24.8247	26.6186	32.0412	29.9588	30.5979
DNA-NCBI-Virus-Complete-Nucleotide-Human-2020-05-11.one_line	470877038	25	5	ACNTG_22233	4400	20.8864	20.2273	21.6818	23.25	27.7955	24.0909	24.7273
DNA-Influenza-2019-04-27.one_line	1106180040	25	5	ACNTG_22233	3750	25.8133	27.6267	27.9467	29.8133	34.9333	32.1333	33.0667
DNA-Genome-Chondrus-crispus-GCA_000350225.2-2013-05-22.one_line	77592685	25	5	ACNTG_22233	2350	24.9362	27.4468	27.3191	28.766	37.7872	33.4043	34.7234
DNA-Mitochondrion-2019-03-15.one_line	241606731	25	5	ACNTG_22233	950	30.6316	29.3684	33.0526	33.8947	50.7368	39.2632	42.9474
DNA-Genome-Fusarium-graminearum-PH-1-GCF_000240135.3-2008-11-21.one_line	34133023	25	5	ACNTG_22233	550	34.1818	32	38.1818	36.5455	64.1818	45.2727	51.6364
DNA-Genome-Astrammina-rara-GCA_000211355.2-2011-04-27.one_line	1362918	25	5	ACNTG_22233	225	51.1111	34.6667	61.3333	56.4444	115.111	68.4444	83.5556
DNA-Genome-Spironucleus-salmonicida-GCA_000497125.1-2013-11-19.one_line	9934367	25	5	ACNTG_22233	175	54.2857	41.1429	66.2857	56.5714	130.286	70.8571	89.1429
DNA-Genome-Strongylocentrotus-purpuratus-GCF_000002235.4-2015-03-10.one_line	659082267	50	5	ACNTG_22233	224950	20.1049	22.7148	20.7762	23.1963	24.0502	23.8342	23.7902
DNA-Genome-Picea-abies-GCA_900067695.1-2016-11-09.one_line	11960690255	50	5	ACNTG_22233	155850	21.2268	23.9621	21.9262	24.1527	24.1829	24.1514	24.1155
DNA-Helicobacter-2019-04-24.one_line	2711601413	50	5	ACNTG_22233	28800	20.1528	22.5729	21.1458	23.3299	24.8785	24.0729	24.0833
DNA-Genome-Salpingoeca-rosetta-GCA_000188695.1-2011-02-10.one_line	37299580	50	5	ACNTG_22233	8500	20.8	23.3529	22.2588	24.2588	28.6941	27.0118	27.2471
DNA-Influenza-2019-04-27.one_line	1106180040	50	5	ACNTG_22233	6450	22.3101	22.7132	23.7519	25.5349	28.8992	26.4651	26.9767
DNA-Genome-Chondrus-crispus-GCA_000350225.2-2013-05-22.one_line	77592685	50	5	ACNTG_22233	4400	22	23.75	23.6364	25.7727	31.75	29.2273	29.9091
DNA-NCBI-Virus-Complete-Nucleotide-Human-2020-05-11.one_line	470877038	50	5	ACNTG_22233	4350	18.9885	17.3793	19.7241	20.9195	25.2874	21.8391	22.2529
DNA-Mitochondrion-2019-03-15.one_line	241606731	50	5	ACNTG_22233	1700	23.4706	21.4706	25.0588	26.5294	36.2941	28.8824	30.8235
DNA-Genome-Fusarium-graminearum-PH-1-GCF_000240135.3-2008-11-21.one_line	34133023	50	5	ACNTG_22233	1650	25.3333	25.8182	27.1515	29.0303	41.5758	35.0303	36.8485
DNA-Genome-Spironucleus-salmonicida-GCA_000497125.1-2013-11-19.one_line	9934367	50	5	ACNTG_22233	300	39.3333	31.6667	45.3333	42	85.6667	49	60
DNA-Genome-Astrammina-rara-GCA_000211355.2-2011-04-27.one_line	1362918	50	5	ACNTG_22233	300	46.6667	34.3333	54	50.3333	97	62.3333	73.3333
DNA-Genome-Cryptosporidium-parvum-Iowa-II-GCA_000165345.1-2007-02-26.one_line	7012512	50	5	ACNTG_22233	50	104	56	160	120	370	132	192
DNA-Genome-Strongylocentrotus-purpuratus-GCF_000002235.4-2015-03-10.one_line	659082267	100	5	ACNTG_22233	585500	19.6859	22.2808	20.2265	22.2477	22.7693	22.6651	22.607
DNA-Helicobacter-2019-04-24.one_line	2711601413	100	5	ACNTG_22233	39500	18.1671	18.7899	18.7139	20.5038	20.8101	20.2076	20.1418
DNA-Genome-Salpingoeca-rosetta-GCA_000188695.1-2011-02-10.one_line	37299580	100	5	ACNTG_22233	15600	19.3333	21.5192	20.359	21.9808	25.109	24.1538	24.1538
DNA-Influenza-2019-04-27.one_line	1106180040	100	5	ACNTG_22233	9300	20.4301	19.6237	21.3548	23.1935	24.6774	22.6022	22.8817
DNA-NCBI-Virus-Complete-Nucleotide-Human-2020-05-11.one_line	470877038	100	5	ACNTG_22233	8500	15.5176	12.6471	15.6235	16.9647	17.9647	15.7176	15.9059
DNA-Genome-Chondrus-crispus-GCA_000350225.2-2013-05-22.one_line	77592685	100	5	ACNTG_22233	6100	20.7377	22.377	21.9344	24.1311	29.1311	26.918	27.3443
DNA-Mitochondrion-2019-03-15.one_line	241606731	100	5	ACNTG_22233	2200	22.4091	21.8182	23.8182	26.0909	34.8636	28.5455	30
DNA-Genome-Fusarium-graminearum-PH-1-GCF_000240135.3-2008-11-21.one_line	34133023	100	5	ACNTG_22233	1700	23.8824	23.5294	25.6471	26.7647	39.8235	32.3529	33.8824
DNA-Genome-Spironucleus-salmonicida-GCA_000497125.1-2013-11-19.one_line	9934367	100	5	ACNTG_22233	1100	27.9091	26.9091	30.3636	30.8182	47.6364	37.7273	40.7273
DNA-Genome-Astrammina-rara-GCA_000211355.2-2011-04-27.one_line	1362918	100	5	ACNTG_22233	600	37	33.6667	39.6667	39	65.1667	47.8333	53.3333
DNA-Genome-Strongylocentrotus-purpuratus-GCF_000002235.4-2015-03-10.one_line	659082267	125	5	ACNTG_22233	633000	20.1924	22.7382	20.6935	22.6719	23.1047	23.0389	22.9156
DNA-Helicobacter-2019-04-24.one_line	2711601413	125	5	ACNTG_22233	31125	18.1847	18.7631	18.7759	20.6008	21.2337	20.3149	20.151
DNA-Genome-Salpingoeca-rosetta-GCA_000188695.1-2011-02-10.one_line	37299580	125	5	ACNTG_22233	16125	19.169	21.3147	20.1054	21.9535	26.214	24.0558	23.814
DNA-Influenza-2019-04-27.one_line	1106180040	125	5	ACNTG_22233	8625	19.6638	19.3043	20.4522	22.1449	24.3362	22.342	22.4928
DNA-Genome-Chondrus-crispus-GCA_000350225.2-2013-05-22.one_line	77592685	125	5	ACNTG_22233	8500	20.1176	21.9882	21.2235	23.3059	27.3412	25.7529	25.6941
DNA-NCBI-Virus-Complete-Nucleotide-Human-2020-05-11.one_line	470877038	125	5	ACNTG_22233	8250	15.1636	13.1273	15.297	16.4848	18.0606	15.9636	16.1939
DNA-Mitochondrion-2019-03-15.one_line	241606731	125	5	ACNTG_22233	2750	22.1455	21.7455	23.5636	25.2	34.2182	28.0727	29.2364
DNA-Genome-Fusarium-graminearum-PH-1-GCF_000240135.3-2008-11-21.one_line	34133023	125	5	ACNTG_22233	2250	21.9111	22.0444	23.4667	25.2889	35.1556	30.2667	31.2889
DNA-Genome-Spironucleus-salmonicida-GCA_000497125.1-2013-11-19.one_line	9934367	125	5	ACNTG_22233	500	34.2	28.8	37.6	36.6	78.1333	45.4	52
DNA-Genome-Astrammina-rara-GCA_000211355.2-2011-04-27.one_line	1362918	125	5	ACNTG_22233	250	49.2	35.2	57.6	52	103.2	61.6	75.2
DNA-Genome-Cryptosporidium-parvum-Iowa-II-GCA_000165345.1-2007-02-26.one_line	7012512	125	5	ACNTG_22233	125	55.2	28	68.8	52.8	139.2	56	80
DNA-Genome-Strongylocentrotus-purpuratus-GCF_000002235.4-2015-03-10.one_line	659082267	150	5	ACNTG_22233	428100	18.8636	21.121	19.367	21.2766	21.7699	21.8645	21.5305
DNA-Helicobacter-2019-04-24.one_line	2711601413	150	5	ACNTG_22233	28350	18.4974	19.9295	19.1675	21.1005	22.0917	21.6155	21.3757
DNA-Genome-Salpingoeca-rosetta-GCA_000188695.1-2011-02-10.one_line	37299580	150	5	ACNTG_22233	18000	19	21	19.8556	21.5833	23.7889	23.4222	23.2444
DNA-NCBI-Virus-Complete-Nucleotide-Human-2020-05-11.one_line	470877038	150	5	ACNTG_22233	11250	14.8711	13.04	14.9867	16.4	16.9244	15.3333	15.3956
DNA-Genome-Chondrus-crispus-GCA_000350225.2-2013-05-22.one_line	77592685	150	5	ACNTG_22233	11250	19.6889	21.6711	20.64	22.6044	25.68	24.8356	24.6756
DNA-Influenza-2019-04-27.one_line	1106180040	150	5	ACNTG_22233	9600	19.3021	17.6563	20	21.6979	22.1979	20.4271	20.5833
DNA-Mitochondrion-2019-03-15.one_line	241606731	150	5	ACNTG_22233	2700	21.8148	21.1481	23.2593	25.1852	33.5185	27.4074	28.5926
DNA-Genome-Fusarium-graminearum-PH-1-GCF_000240135.3-2008-11-21.one_line	34133023	150	5	ACNTG_22233	2250	22.6222	22.9778	24.1778	25.4667	36.5778	30.9778	31.8222
DNA-Genome-Spironucleus-salmonicida-GCA_000497125.1-2013-11-19.one_line	9934367	150	5	ACNTG_22233	450	34.4444	29.3333	37.3333	33.7778	84.6667	44.4444	51.5556
DNA-Genome-Astrammina-rara-GCA_000211355.2-2011-04-27.one_line	1362918	150	5	ACNTG_22233	450	41.1111	35.3333	45.3333	42.6667	75.3333	52.2222	59.5556
DNA-Genome-Strongylocentrotus-purpuratus-GCF_000002235.4-2015-03-10.one_line	659082267	250	5	ACNTG_22233	380750	19.5538	21.5336	20.0242	21.8301	22.072	22.1563	21.8957
DNA-Helicobacter-2019-04-24.one_line	2711601413	250	5	ACNTG_22233	31000	18.3323	19.6194	18.9355	20.8968	21.5677	21.2129	20.9419
DNA-Genome-Salpingoeca-rosetta-GCA_000188695.1-2011-02-10.one_line	37299580	250	5	ACNTG_22233	23500	18.7574	20.5277	19.5574	21.0553	22.6213	22.5149	22.5362
DNA-Genome-Chondrus-crispus-GCA_000350225.2-2013-05-22.one_line	77592685	250	5	ACNTG_22233	21250	18.9929	21.0165	19.7741	21.4682	23.4071	23.1953	23.0776
DNA-Influenza-2019-04-27.one_line	1106180040	250	5	ACNTG_22233	8750	19.5429	18.0114	20.1829	22	22.4914	20.9371	21.2571
DNA-NCBI-Virus-Complete-Nucleotide-Human-2020-05-11.one_line	470877038	250	5	ACNTG_22233	6250	20.288	19.984	21.088	22.976	26.224	23.84	23.808
DNA-Genome-Fusarium-graminearum-PH-1-GCF_000240135.3-2008-11-21.one_line	34133023	250	5	ACNTG_22233	5000	19.84	21.02	21	22.22	27.72	26.06	26.16
DNA-Mitochondrion-2019-03-15.one_line	241606731	250	5	ACNTG_22233	3000	21.4333	22.1667	22.8667	24.6333	32.2667	27.7	28.2667
DNA-Genome-Spironucleus-salmonicida-GCA_000497125.1-2013-11-19.one_line	9934367	250	5	ACNTG_22233	250	40.4	26.4	47.2	38	66.6	50.8	64
DNA-Genome-Cryptosporidium-parvum-Iowa-II-GCA_000165345.1-2007-02-26.one_line	7012512	250	5	ACNTG_22233	250	35.6	16.8	39.2	31.6	75.2	30.8	44.8
DNA-Genome-Strongylocentrotus-purpuratus-GCF_000002235.4-2015-03-10.one_line	659082267	500	5	ACNTG_22233	268500	18.4708	20.0466	18.9408	20.5114	20.5505	20.7628	20.6555
DNA-Genome-Salpingoeca-rosetta-GCA_000188695.1-2011-02-10.one_line	37299580	500	5	ACNTG_22233	52500	19.3219	21.4914	19.8629	21.4152	22.4324	22.6057	22.3924
DNA-Genome-Chondrus-crispus-GCA_000350225.2-2013-05-22.one_line	77592685	500	5	ACNTG_22233	45500	19.6791	21.7626	20.2462	21.9846	22.9604	23.0484	22.8923
DNA-Helicobacter-2019-04-24.one_line	2711601413	500	5	ACNTG_22233	21500	18.214	19.8558	19.0605	20.9581	21.6512	21.4233	21.3395
DNA-Genome-Fusarium-graminearum-PH-1-GCF_000240135.3-2008-11-21.one_line	34133023	500	5	ACNTG_22233	14000	19.9643	21.9929	20.7143	22.1143	24.9643	24.4357	24.4
DNA-Influenza-2019-04-27.one_line	1106180040	500	5	ACNTG_22233	9500	16.6737	12.9158	17.0105	18.2105	17.5263	15.5684	15.8737
DNA-NCBI-Virus-Complete-Nucleotide-Human-2020-05-11.one_line	470877038	500	5	ACNTG_22233	8500	18.9412	16.9882	18.0471	21.0118	21.3882	19.9647	20.0471
DNA-Mitochondrion-2019-03-15.one_line	241606731	500	5	ACNTG_22233	1500	23	20.6	24.4	25.3333	37.1333	28.6667	30.9333
DNA-Genome-Spironucleus-salmonicida-GCA_000497125.1-2013-11-19.one_line	9934367	500	5	ACNTG_22233	500	33.2	27	36.4	34.2	43	49.6
DNA-Genome-Strongylocentrotus-purpuratus-GCF_000002235.4-2015-03-10.one_line	659082267	750	5	ACNTG_22233	276750	18.361	19.8602	18.7982	20.3053	20.279	20.5388	20.3288
DNA-Genome-Salpingoeca-rosetta-GCA_000188695.1-2011-02-10.one_line	37299580	750	5	ACNTG_22233	24000	18.3458	19.8542	19.0667	20.3667	21.8208	21.5167	21.4833
DNA-Genome-Chondrus-crispus-GCA_000350225.2-2013-05-22.one_line	77592685	750	5	ACNTG_22233	23250	18.6667	20.6151	19.4753	20.9634	22.486	22.1849	22.1075
DNA-Influenza-2019-04-27.one_line	1106180040	750	5	ACNTG_22233	13500	15.0889	11.8	15.437	16.437	15.0963	14.1111	14.1926
DNA-Helicobacter-2019-04-24.one_line	2711601413	750	5	ACNTG_22233	12750	19.0588	21.1843	20.0471	21.9451	23.9216	23.2941	23.2471
DNA-Genome-Fusarium-graminearum-PH-1-GCF_000240135.3-2008-11-21.one_line	34133023	750	5	ACNTG_22233	12750	19.6863	21.4588	20.6431	21.8588	24.5412	24.2353	24.0627
DNA-NCBI-Virus-Complete-Nucleotide-Human-2020-05-11.one_line	470877038	750	5	ACNTG_22233	6000	19.2333	19	19	21.7333	24.4333	22.9167	23.0667
DNA-Genome-Spironucleus-salmonicida-GCA_000497125.1-2013-11-19.one_line	9934367	750	5	ACNTG_22233	750	27.6	23.0667	30.1333	27.6	36.4	41.0667
DNA-Genome-Strongylocentrotus-purpuratus-GCF_000002235.4-2015-03-10.one_line	659082267	1000	5	ACNTG_22233	272000	18.2566	19.661	18.675	20.1772	19.8963	20.2893	20.0971
DNA-Genome-Chondrus-crispus-GCA_000350225.2-2013-05-22.one_line	77592685	1000	5	ACNTG_22233	34000	18.7029	20.6853	19.4	20.8941	21.9735	21.8853	21.8588
DNA-Genome-Salpingoeca-rosetta-GCA_000188695.1-2011-02-10.one_line	37299580	1000	5	ACNTG_22233	28000	18.375	19.4143	18.7143	20.275	20.9786	20.9786	20.9
DNA-Helicobacter-2019-04-24.one_line	2711601413	1000	5	ACNTG_22233	18000	17.8222	19.0667	18.6222	20.3278	21.0167	20.6556	20.6667
DNA-Influenza-2019-04-27.one_line	1106180040	1000	5	ACNTG_22233	10000	15.5	10.98	15.38	16.94	14.89	13.39	13.68
DNA-Genome-Fusarium-graminearum-PH-1-GCF_000240135.3-2008-11-21.one_line	34133023	1000	5	ACNTG_22233	9000	20.6333	22.3333	21.6222	22.7	26.5	25.4444	25.4222
DNA-NCBI-Virus-Complete-Nucleotide-Human-2020-05-11.one_line	470877038	1000	5	ACNTG_22233	7000	18.2714	15.6	15.8571	20.1	20.0286	18.3714	18.6857
DNA-Genome-Spironucleus-salmonicida-GCA_000497125.1-2013-11-19.one_line	9934367	1000	5	ACNTG_22233	1000	27.4	24.4	30	29.2	28.2	35	38.4
DNA-Genome-Strongylocentrotus-purpuratus-GCF_000002235.4-2015-03-10.one_line	659082267	2500	5	ACNTG_22233	255000	17.9788	18.8255	18.0769	19.7145	19.0776	19.3878	19.302
DNA-Genome-Chondrus-crispus-GCA_000350225.2-2013-05-22.one_line	77592685	2500	5	ACNTG_22233	55000	18.4582	20.4291	18.9018	20.5473	21.18	21.4891	21.4473
DNA-Genome-Salpingoeca-rosetta-GCA_000188695.1-2011-02-10.one_line	37299580	2500	5	ACNTG_22233	27500	18.6764	20.6	19.2364	20.6327	21.8327	21.7891	21.9345
DNA-Genome-Fusarium-graminearum-PH-1-GCF_000240135.3-2008-11-21.one_line	34133023	2500	5	ACNTG_22233	15000	18.8333	20.5533	19.4533	20.66	23.18	22.74	22.9067
DNA-NCBI-Virus-Complete-Nucleotide-Human-2020-05-11.one_line	470877038	2500	5	ACNTG_22233	10000	19.93	18.81	20.62	22.23	22.38	21.59	21.6
DNA-Genome-Spironucleus-salmonicida-GCA_000497125.1-2013-11-19.one_line	9934367	2500	5	ACNTG_22233	7500	19.0133	18.2267	18.56	20.7733	32.52	21.52	21.6
DNA-Helicobacter-2019-04-24.one_line	2711601413	2500	5	ACNTG_22233	2500	21.64	22.24	23.36	24.88	32.2	27.8	29.28
DNA-Genome-Strongylocentrotus-purpuratus-GCF_000002235.4-2015-03-10.one_line	659082267	5000	5	ACNTG_22233	195000	17.7528	19.0672	17.9733	19.5092	19.3	19.7492	19.6718
DNA-Genome-Fusarium-graminearum-PH-1-GCF_000240135.3-2008-11-21.one_line	34133023	5000	5	ACNTG_22233	20000	18.26	20.055	18.81	20.155	21.61	21.575	21.68
DNA-Genome-Chondrus-crispus-GCA_000350225.2-2013-05-22.one_line	77592685	5000	5	ACNTG_22233	15000	20.1667	21.8067	20.7733	22.24	24.1667	23.8333	23.9467
DNA-Helicobacter-2019-04-24.one_line	2711601413	5000	5	ACNTG_22233	5000	20.02	21.88	21.24	22.86	27.22	25.34	25.84
DNA-Genome-Salpingoeca-rosetta-GCA_000188695.1-2011-02-10.one_line	37299580	5000	5	ACNTG_22233	5000	18.06	19.02	19.2	20.2	25.14	23.16	23.84
DNA-Genome-Spironucleus-salmonicida-GCA_000497125.1-2013-11-19.one_line	9934367	5000	5	ACNTG_22233	5000	19.36	18.26	18.6	21.52	23.54	22.08	22.48
DNA-Genome-Strongylocentrotus-purpuratus-GCF_000002235.4-2015-03-10.one_line	659082267	10000	5	ACNTG_22233	70000	17.1371	18.3386	17.4743	18.8786	19.0157	19.3543	19.1771
DNA-Genome-Chondrus-crispus-GCA_000350225.2-2013-05-22.one_line	77592685	10000	5	ACNTG_22233	70000	19.09	21.26	19.4686	20.9757	21.5943	21.9129	21.8286
DNA-Genome-Salpingoeca-rosetta-GCA_000188695.1-2011-02-10.one_line	37299580	10000	5	ACNTG_22233	20000	16.36	13.915	16.1	17.955	15.765	15.525	15.64
DNA-NCBI-Virus-Complete-Nucleotide-Human-2020-05-11.one_line	470877038	10000	5	ACNTG_22233	10000	17.25	18.76	18.04	19.26	22.02	21.62	21.52
DNA-Genome-Picea-abies-GCA_900067695.1-2016-11-09.one_line	11960690255	25	5	ACTGN_12344	80350	24.0075	24.9956	25.0629	27.8531	27.374	27.3479	27.3006
DNA-Genome-Strongylocentrotus-purpuratus-GCF_000002235.4-2015-03-10.one_line	659082267	25	5	ACTGN_12344	21325	25.1208	25.2755	26.6823	29.1958	30.2696	29.9273	29.9555
DNA-Helicobacter-2019-04-24.one_line	2711601413	25	5	ACTGN_12344	4050	25.679	25.358	27.8025	29.8272	34.4444	32.0741	32.6914
DNA-Influenza-2019-04-27.one_line	1106180040	25	5	ACTGN_12344	3025	26.7769	24.7934	28.9587	30.0826	35.405	31.9339	33.0579
DNA-Mitochondrion-2019-03-15.one_line	241606731	25	5	ACTGN_12344	2275	27.6044	25.8462	30.2418	31.8242	40.2637	35.6484	37.0989
DNA-NCBI-Virus-Complete-Nucleotide-Human-2020-05-11.one_line	470877038	25	5	ACTGN_12344	2200	25.9091	21.7273	27.4545	28.2727	34.9091	29.9545	31.4545
DNA-Genome-Astrammina-rara-GCA_000211355.2-2011-04-27.one_line	1362918	25	5	ACTGN_12344	400	39.25	28.75	46	41.5	80	54	62
DNA-Genome-Chondrus-crispus-GCA_000350225.2-2013-05-22.one_line	77592685	25	5	ACTGN_12344	75	78.6667	49.3333	117.333	92	280	108	149.333
DNA-Genome-Salpingoeca-rosetta-GCA_000188695.1-2011-02-10.one_line	37299580	25	5	ACTGN_12344	50	100	60	160	112	370	138	200
DNA-Genome-Cryptosporidium-parvum-Iowa-II-GCA_000165345.1-2007-02-26.one_line	7012512	25	5	ACTGN_12344	25	156	96	284	212	640	216	336
DNA-Genome-Picea-abies-GCA_900067695.1-2016-11-09.one_line	11960690255	50	5	ACTGN_12344	192000	22.6563	23.3667	23.3823	26.0047	24.399	24.2542	24.2813
DNA-Genome-Strongylocentrotus-purpuratus-GCF_000002235.4-2015-03-10.one_line	659082267	50	5	ACTGN_12344	26450	24.9603	25.7694	26.3214	28.9641	29.6975	29.4253	29.4442
DNA-Helicobacter-2019-04-24.one_line	2711601413	50	5	ACTGN_12344	8150	23.8037	24.5031	25.4233	27.6687	29.8405	28.4172	28.908
DNA-Mitochondrion-2019-03-15.one_line	241606731	50	5	ACTGN_12344	5900	25.4068	24.7119	27.2881	29.5424	32.1356	30.5254	30.8475
DNA-Influenza-2019-04-27.one_line	1106180040	50	5	ACTGN_12344	3850	25.5584	22.3377	26.961	28.3117	32.2078	28.1299	28.8831
DNA-NCBI-Virus-Complete-Nucleotide-Human-2020-05-11.one_line	470877038	50	5	ACTGN_12344	2850	23.9298	21.4035	25.4737	27.0877	32.7018	27.8596	29.193
DNA-Genome-Astrammina-rara-GCA_000211355.2-2011-04-27.one_line	1362918	50	5	ACTGN_12344	450	38	29.3333	44	40.4444	75.7778	52.6667	60.4444
DNA-Genome-Salpingoeca-rosetta-GCA_000188695.1-2011-02-10.one_line	37299580	50	5	ACTGN_12344	100	70	41	96	73	196	92	120
DNA-Genome-Chondrus-crispus-GCA_000350225.2-2013-05-22.one_line	77592685	50	5	ACTGN_12344	50	100	64	156	112	370	134	192
DNA-Genome-Fusarium-graminearum-PH-1-GCF_000240135.3-2008-11-21.one_line	34133023	50	5	ACTGN_12344	50	102	62	160	120	370	136	192
DNA-Genome-Picea-abies-GCA_900067695.1-2016-11-09.one_line	11960690255	100	5	ACTGN_12344	367900	21.3167	20.7934	21.8086	24.0394	21.343	21.2014	21.1644
DNA-Genome-Strongylocentrotus-purpuratus-GCF_000002235.4-2015-03-10.one_line	659082267	100	5	ACTGN_12344	21200	24.5849	25.7877	25.8491	28.3019	29.3538	28.9198	29.0189
DNA-Helicobacter-2019-04-24.one_line	2711601413	100	5	ACTGN_12344	14300	21.993	21.5524	22.8951	25.0839	25.5944	24.3007	24.5035
DNA-Mitochondrion-2019-03-15.one_line	241606731	100	5	ACTGN_12344	9700	24.4742	24.5876	25.7938	27.9691	30	28.7526	29.0309
DNA-Influenza-2019-04-27.one_line	1106180040	100	5	ACTGN_12344	3600	25.3611	21.5833	26.4444	27.6111	29.4167	26.3333	27.3333
DNA-NCBI-Virus-Complete-Nucleotide-Human-2020-05-11.one_line	470877038	100	5	ACTGN_12344	1500	27.8667	26.2	29.7333	31.2	43.0667	35.1333	37.0667
DNA-Genome-Astrammina-rara-GCA_000211355.2-2011-04-27.one_line	1362918	100	5	ACTGN_12344	500	36.2	29	41.6	38.8	70	49.2	56
DNA-Genome-Salpingoeca-rosetta-GCA_000188695.1-2011-02-10.one_line	37299580	100	5	ACTGN_12344	100	68	43	94	73	194	90	120
DNA-Genome-Picea-abies-GCA_900067695.1-2016-11-09.one_line	11960690255	125	5	ACTGN_12344	408500	20.9381	20.3202	21.3905	23.5625	20.8196	20.6933	20.6022
DNA-Genome-Strongylocentrotus-purpuratus-GCF_000002235.4-2015-03-10.one_line	659082267	125	5	ACTGN_12344	17875	24.5706	25.7455	25.835	28.2517	29.4322	29.0294	29.0014
DNA-Helicobacter-2019-04-24.one_line	2711601413	125	5	ACTGN_12344	16250	22.1477	21.6369	22.9785	24.9169	24.8123	23.8154	24.0492
DNA-Mitochondrion-2019-03-15.one_line	241606731	125	5	ACTGN_12344	10750	24.186	23.7302	25.3395	27.5814	28.6233	27.3395	27.6837
DNA-Influenza-2019-04-27.one_line	1106180040	125	5	ACTGN_12344	4500	24.1111	20.6	24.8444	26.1778	27.1333	24.7333	25.3333
DNA-NCBI-Virus-Complete-Nucleotide-Human-2020-05-11.one_line	470877038	125	5	ACTGN_12344	3625	24.1103	19.5586	24.8276	26.2621	29.1034	25.269	26.0414
DNA-Genome-Chondrus-crispus-GCA_000350225.2-2013-05-22.one_line	77592685	125	5	ACTGN_12344	125	62.4	44.8	81.6	68	160	76	99.2
DNA-Genome-Salpingoeca-rosetta-GCA_000188695.1-2011-02-10.one_line	37299580	125	5	ACTGN_12344	125	62.4	40.8	81.6	65.6	164	80.8	105.6
DNA-Genome-Astrammina-rara-GCA_000211355.2-2011-04-27.one_line	1362918	125	5	ACTGN_12344	125	60	39.2	80	67.2	160.8	77.6	102.4
DNA-Genome-Picea-abies-GCA_900067695.1-2016-11-09.one_line	11960690255	150	5	ACTGN_12344	426750	20.8105	20.2791	21.2373	23.4064	20.6999	20.6214	20.5151
DNA-Helicobacter-2019-04-24.one_line	2711601413	150	5	ACTGN_12344	17700	21.7627	20.8531	22.4746	24.6102	24	23	23.209
DNA-Genome-Strongylocentrotus-purpuratus-GCF_000002235.4-2015-03-10.one_line	659082267	150	5	ACTGN_12344	14550	24.6598	25.5876	25.8832	28.2337	29.5945	28.9759	29.1134
DNA-Mitochondrion-2019-03-15.one_line	241606731	150	5	ACTGN_12344	11700	23.9316	23.6752	25.0769	27.3333	28.265	27.3162	27.3162
DNA-Influenza-2019-04-27.one_line	1106180040	150	5	ACTGN_12344	4200	25.4048	23.0952	26.7619	28.0238	30.4286	27.8095	28.5714
DNA-NCBI-Virus-Complete-Nucleotide-Human-2020-05-11.one_line	470877038	150	5	ACTGN_12344	4200	22.6905	18.5	23.3333	24.6667	26.5238	23.2143	23.8095
DNA-Genome-Astrammina-rara-GCA_000211355.2-2011-04-27.one_line	1362918	150	5	ACTGN_12344	300	42.3333	33.6667	50	44.3333	90.6667	56	66.6667
DNA-Genome-Picea-abies-GCA_900067695.1-2016-11-09.one_line	11960690255	250	5	ACTGN_12344	421750	20.7201	20.3483	21.1201	23.2299	20.4358	20.3976	20.2461
DNA-Helicobacter-2019-04-24.one_line	2711601413	250	5	ACTGN_12344	21000	22.4429	21.7524	23.0952	25.2286	24.0905	23.4143	23.5429
DNA-Mitochondrion-2019-03-15.one_line	241606731	250	5	ACTGN_12344	20250	23.3037	23.279	24.1284	26.4593	26.5679	25.842	26.0741
DNA-NCBI-Virus-Complete-Nucleotide-Human-2020-05-11.one_line	470877038	250	5	ACTGN_12344	11250	17.5556	11.9467	16.1422	18.7467	16.2222	14.3289	14.5778
DNA-Genome-Strongylocentrotus-purpuratus-GCF_000002235.4-2015-03-10.one_line	659082267	250	5	ACTGN_12344	10750	24.0558	24.986	25.2093	27.3767	29.1721	28.7256	28.5395
DNA-Influenza-2019-04-27.one_line	1106180040	250	5	ACTGN_12344	2250	26.7556	24.4444	27.1111	29.2	35.6889	31.0222	32.3556
DNA-Genome-Chondrus-crispus-GCA_000350225.2-2013-05-22.one_line	77592685	250	5	ACTGN_12344	250	45.2	32.4	55.2	46.8	104	62.4	75.2
DNA-Genome-Picea-abies-GCA_900067695.1-2016-11-09.one_line	11960690255	500	5	ACTGN_12344	292000	21.0199	20.701	21.4397	23.5243	20.5483	20.449	20.3986
DNA-Mitochondrion-2019-03-15.one_line	241606731	500	5	ACTGN_12344	28000	23.1786	22.3286	23.8571	26.0143	24.6107	23.9679	24.2143
DNA-NCBI-Virus-Complete-Nucleotide-Human-2020-05-11.one_line	470877038	500	5	ACTGN_12344	24500	15.8286	10.3347	14.7673	16.7878	12.6245	11.551	11.7224
DNA-Genome-Strongylocentrotus-purpuratus-GCF_000002235.4-2015-03-10.one_line	659082267	500	5	ACTGN_12344	13500	23.5852	24.6148	24.5778	26.6593	28.2074	27.3407	27.6741
DNA-Helicobacter-2019-04-24.one_line	2711601413	500	5	ACTGN_12344	13000	22.0077	20.8231	22.4154	24.6615	23.9846	22.9154	23.1692
DNA-Genome-Picea-abies-GCA_900067695.1-2016-11-09.one_line	11960690255	750	5	ACTGN_12344	221250	21.2646	20.8569	21.609	23.7234	20.7417	20.6423	20.6445
DNA-NCBI-Virus-Complete-Nucleotide-Human-2020-05-11.one_line	470877038	750	5	ACTGN_12344	30000	16.41	10.0667	15.34	17.5233	12.0267	11.1167	11.28
DNA-Mitochondrion-2019-03-15.one_line	241606731	750	5	ACTGN_12344	25500	23.3098	22.6706	23.5686	26.349	25.1059	24.5373	24.8627
DNA-Helicobacter-2019-04-24.one_line	2711601413	750	5	ACTGN_12344	13500	21.2815	19.7852	21.7778	23.5926	22.363	21.5481	21.837
DNA-Genome-Strongylocentrotus-purpuratus-GCF_000002235.4-2015-03-10.one_line	659082267	750	5	ACTGN_12344	11250	23.6	24.4178	24.5511	26.5511	28.0622	27.3778	27.4133
DNA-Genome-Picea-abies-GCA_900067695.1-2016-11-09.one_line	11960690255	1000	5	ACTGN_12344	178000	21.8034	21.5006	22.173	24.3	21.2764	21.2365	21.2494
DNA-NCBI-Virus-Complete-Nucleotide-Human-2020-05-11.one_line	470877038	1000	5	ACTGN_12344	44000	14.2023	7.9386	12.9136	14.9477	9.35	8.7205	8.8091
DNA-Mitochondrion-2019-03-15.one_line	241606731	1000	5	ACTGN_12344	37000	23.2243	22.1486	23.8541	26.2	23.8162	23.2865	23.6649
DNA-Genome-Strongylocentrotus-purpuratus-GCF_000002235.4-2015-03-10.one_line	659082267	1000	5	ACTGN_12344	16000	23.0375	23.3313	23.7625	25.9063	26.5125	26.2188	26.1
DNA-Helicobacter-2019-04-24.one_line	2711601413	1000	5	ACTGN_12344	15000	21.56	19.0933	21.4133	23.8533	21.6867	20.94	21.1733
DNA-NCBI-Virus-Complete-Nucleotide-Human-2020-05-11.one_line	470877038	2500	5	ACTGN_12344	75000	10.052	4.9147	9.3467	10.5533	5.904	5.5227	5.5253
DNA-Mitochondrion-2019-03-15.one_line	241606731	2500	5	ACTGN_12344	42500	22.7553	21.1459	23.2612	25.5271	22.9012	22.5106	22.7106
DNA-Genome-Strongylocentrotus-purpuratus-GCF_000002235.4-2015-03-10.one_line	659082267	2500	5	ACTGN_12344	22500	23.3511	24.6356	24.0267	26.1422	26.3689	26.0444	26.0622
DNA-Genome-Picea-abies-GCA_900067695.1-2016-11-09.one_line	11960690255	2500	5	ACTGN_12344	12500	18.088	18.52	18.544	20.528	21.504	20.512	20.928
DNA-Mitochondrion-2019-03-15.one_line	241606731	5000	5	ACTGN_12344	60000	22.1567	19.18	22.4833	24.6167	20.4283	20.105	20.2467
DNA-Mitochondrion-2019-03-15.one_line	241606731	10000	5	ACTGN_12344	60000	22.8333	21.52	23.38	25.86	22.9	22.4767	22.7
DNA-Genome-Picea-abies-GCA_900067695.1-2016-11-09.one_line	11960690255	25	5	ACTGN_13333	183000	23.224	25.9978	24.0929	27.1814	26.1344	26.1869	26.1071
DNA-Genome-Strongylocentrotus-purpuratus-GCF_000002235.4-2015-03-10.one_line	659082267	25	5	ACTGN_13333	46700	23.9893	26.3255	25.2548	28.2398	28.2655	28.1563	28.1627
DNA-Influenza-2019-04-27.one_line	1106180040	25	5	ACTGN_13333	5625	25.9022	25.3867	27.6267	29.0667	32.2133	30.4711	30.9333
DNA-Helicobacter-2019-04-24.one_line	2711601413	25	5	ACTGN_13333	5375	24.1674	25.9163	26.1209	28.3349	31.814	30.0651	30.5116
DNA-NCBI-Virus-Complete-Nucleotide-Human-2020-05-11.one_line	470877038	25	5	ACTGN_13333	3700	23.8649	21.5946	24.973	26.5676	30.4324	26.6757	27.6757
DNA-Mitochondrion-2019-03-15.one_line	241606731	25	5	ACTGN_13333	875	32.6857	27.2	36.8	36	56	44	48
DNA-Genome-Salpingoeca-rosetta-GCA_000188695.1-2011-02-10.one_line	37299580	25	5	ACTGN_13333	400	39.5	32	45	41.75	78.5	52.5	61
DNA-Genome-Astrammina-rara-GCA_000211355.2-2011-04-27.one_line	1362918	25	5	ACTGN_13333	300	44.3333	31	52	46.3333	95.3333	60.3333	72
DNA-Genome-Chondrus-crispus-GCA_000350225.2-2013-05-22.one_line	77592685	25	5	ACTGN_13333	200	51.5	35	62	54.5	120.5	68.5	86
DNA-Genome-Fusarium-graminearum-PH-1-GCF_000240135.3-2008-11-21.one_line	34133023	25	5	ACTGN_13333	150	58.6667	39.3333	73.3333	63.3333	142.667	73.3333	96
DNA-Genome-Picea-abies-GCA_900067695.1-2016-11-09.one_line	11960690255	50	5	ACTGN_13333	354800	21.7139	23.7573	22.4262	25.0967	23.52	23.4428	23.4735
DNA-Genome-Strongylocentrotus-purpuratus-GCF_000002235.4-2015-03-10.one_line	659082267	50	5	ACTGN_13333	49000	23.0327	25.4	24.1796	26.8714	27.3653	27.202	27.2163
DNA-Helicobacter-2019-04-24.one_line	2711601413	50	5	ACTGN_13333	15750	21.8032	23.9683	23.0984	25.4857	26.8508	26.1524	26.3619
DNA-Influenza-2019-04-27.one_line	1106180040	50	5	ACTGN_13333	6050	25.5207	24.843	27.2066	28.9587	31.2066	29.2397	29.9504
DNA-NCBI-Virus-Complete-Nucleotide-Human-2020-05-11.one_line	470877038	50	5	ACTGN_13333	5550	18.0721	16.5766	18.6306	20.2883	24	19.8739	20.3964
DNA-Mitochondrion-2019-03-15.one_line	241606731	50	5	ACTGN_13333	750	33.2	31.0667	36.5333	37.3333	57.4667	43.6	48
DNA-Genome-Salpingoeca-rosetta-GCA_000188695.1-2011-02-10.one_line	37299580	50	5	ACTGN_13333	550	33.2727	30.9091	37.0909	36.7273	62.9091	44	50.1818
DNA-Genome-Astrammina-rara-GCA_000211355.2-2011-04-27.one_line	1362918	50	5	ACTGN_13333	250	48	32.8	56.8	50.4	104	62.4	75.2
DNA-Genome-Chondrus-crispus-GCA_000350225.2-2013-05-22.one_line	77592685	50	5	ACTGN_13333	200	51	38	61	53.5	115.5	63.5	80
DNA-Genome-Fusarium-graminearum-PH-1-GCF_000240135.3-2008-11-21.one_line	34133023	50	5	ACTGN_13333	150	58	41.3333	72	60.6667	143.333	74.6667	96
DNA-Genome-Spironucleus-salmonicida-GCA_000497125.1-2013-11-19.one_line	9934367	50	5	ACTGN_13333	50	102	58	156	118	370	130	192
DNA-Genome-Picea-abies-GCA_900067695.1-2016-11-09.one_line	11960690255	100	5	ACTGN_13333	275800	21.7893	21.9953	22.3437	24.5649	22.091	21.9801	21.984
DNA-Genome-Strongylocentrotus-purpuratus-GCF_000002235.4-2015-03-10.one_line	659082267	100	5	ACTGN_13333	37400	22.2647	24.4893	23.3155	25.8182	27.139	26.5829	26.6631
DNA-Helicobacter-2019-04-24.one_line	2711601413	100	5	ACTGN_13333	29200	21.0548	22.7534	22.0068	24.2329	24.9007	24.2363	24.3288
DNA-Influenza-2019-04-27.one_line	1106180040	100	5	ACTGN_13333	6900	22.5652	20.2029	23.4783	24.9275	25.1159	23.2464	23.7101
DNA-NCBI-Virus-Complete-Nucleotide-Human-2020-05-11.one_line	470877038	100	5	ACTGN_13333	5500	18.2545	15.2545	18.5091	20.0182	21.8364	18.7455	19.2727
DNA-Mitochondrion-2019-03-15.one_line	241606731	100	5	ACTGN_13333	800	32.5	29.875	35.75	36	55.875	42.875	47
DNA-Genome-Salpingoeca-rosetta-GCA_000188695.1-2011-02-10.one_line	37299580	100	5	ACTGN_13333	400	37.75	31	42.5	41.75	74.5	48.75	57
DNA-Genome-Astrammina-rara-GCA_000211355.2-2011-04-27.one_line	1362918	100	5	ACTGN_13333	200	52	38.5	62	53	117	65	82
DNA-Genome-Picea-abies-GCA_900067695.1-2016-11-09.one_line	11960690255	125	5	ACTGN_13333	215375	22.0898	22.0337	22.5588	24.8441	22.2389	22.12	22.1456
DNA-Genome-Strongylocentrotus-purpuratus-GCF_000002235.4-2015-03-10.one_line	659082267	125	5	ACTGN_13333	39375	21.5644	23.8502	22.5829	24.9651	26.4813	25.8032	25.8946
DNA-Helicobacter-2019-04-24.one_line	2711601413	125	5	ACTGN_13333	36000	20.1972	20.9722	20.8944	22.9667	23.1694	22.2083	22.2778
DNA-Influenza-2019-04-27.one_line	1106180040	125	5	ACTGN_13333	6250	22.672	20.08	23.552	25.456	25.936	23.744	24.32
DNA-NCBI-Virus-Complete-Nucleotide-Human-2020-05-11.one_line	470877038	125	5	ACTGN_13333	5875	19.5064	15.6085	19.7787	21.1915	22.3149	18.8936	19.4043
DNA-Mitochondrion-2019-03-15.one_line	241606731	125	5	ACTGN_13333	625	33.76	29.76	37.12	37.76	62.08	45.44	50.56
DNA-Genome-Salpingoeca-rosetta-GCA_000188695.1-2011-02-10.one_line	37299580	125	5	ACTGN_13333	625	32	29.28	35.2	35.84	59.2	42.4	48
DNA-Genome-Picea-abies-GCA_900067695.1-2016-11-09.one_line	11960690255	150	5	ACTGN_13333	159900	22.2695	22.1132	22.738	24.8893	22.3996	22.2683	22.2714
DNA-Genome-Strongylocentrotus-purpuratus-GCF_000002235.4-2015-03-10.one_line	659082267	150	5	ACTGN_13333	56100	21.3405	23.7219	22.2103	24.5526	25.6007	25.205	25.262
DNA-Helicobacter-2019-04-24.one_line	2711601413	150	5	ACTGN_13333	34950	20.1316	20.578	20.7554	22.8813	22.7153	21.8369	21.9285
DNA-NCBI-Virus-Complete-Nucleotide-Human-2020-05-11.one_line	470877038	150	5	ACTGN_13333	9000	12.2333	9.7	12.3111	13.1222	13.7889	11.7778	12.0444
DNA-Influenza-2019-04-27.one_line	1106180040	150	5	ACTGN_13333	5700	22.6491	19.7193	23.3684	25.3684	25.614	23.4211	24
DNA-Mitochondrion-2019-03-15.one_line	241606731	150	5	ACTGN_13333	600	34.5	29.5	38	37.8333	63.5	46.3333	52
DNA-Genome-Salpingoeca-rosetta-GCA_000188695.1-2011-02-10.one_line	37299580	150	5	ACTGN_13333	450	36.2222	30	40.4444	40.6667	70.8889	47.7778	55.1111
DNA-Genome-Astrammina-rara-GCA_000211355.2-2011-04-27.one_line	1362918	150	5	ACTGN_13333	150	57.3333	39.3333	70.6667	57.3333	138	68.6667	90.6667
DNA-Genome-Picea-abies-GCA_900067695.1-2016-11-09.one_line	11960690255	250	5	ACTGN_13333	71750	22.7875	22.7624	23.3951	25.5805	23.6544	23.3226	23.4815
DNA-Helicobacter-2019-04-24.one_line	2711601413	250	5	ACTGN_13333	31500	19.8667	19.727	20.3492	22.3175	22.0095	20.9619	21.0667
DNA-Genome-Strongylocentrotus-purpuratus-GCF_000002235.4-2015-03-10.one_line	659082267	250	5	ACTGN_13333	29250	22.3658	24.5333	23.2889	25.5145	26.8957	26.4444	26.3248
DNA-NCBI-Virus-Complete-Nucleotide-Human-2020-05-11.one_line	470877038	250	5	ACTGN_13333	7750	15.2258	12.1935	14.7097	16.7226	17.1355	14.5419	14.8645
DNA-Influenza-2019-04-27.one_line	1106180040	250	5	ACTGN_13333	6500	19.6154	15.4154	19.8462	21.7077	20.6769	18.4154	18.8308
DNA-Mitochondrion-2019-03-15.one_line	241606731	250	5	ACTGN_13333	750	32	28.6667	35.4667	36.1333	57.3333	42.8	47.4667
DNA-Helicobacter-2019-04-24.one_line	2711601413	500	5	ACTGN_13333	32000	19	17.5281	19.1813	20.9844	19.7563	18.8094	18.8625
DNA-Genome-Picea-abies-GCA_900067695.1-2016-11-09.one_line	11960690255	500	5	ACTGN_13333	12000	24.0833	25.775	25.1667	27.325	28.4333	27.5	27.8
DNA-Genome-Strongylocentrotus-purpuratus-GCF_000002235.4-2015-03-10.one_line	659082267	500	5	ACTGN_13333	8500	22.7765	23.2118	23.4118	25.6824	27.4353	26.2	26.2118
DNA-Influenza-2019-04-27.one_line	1106180040	500	5	ACTGN_13333	3500	20.2286	13.7714	20.5714	22.2286	21.7429	18.1429	19.0857
DNA-NCBI-Virus-Complete-Nucleotide-Human-2020-05-11.one_line	470877038	500	5	ACTGN_13333	3500	22.3429	18.6571	21.4857	24.8	26.8	23.4857	24.1143
DNA-Helicobacter-2019-04-24.one_line	2711601413	750	5	ACTGN_13333	34500	19.4464	18.6928	19.7971	21.6232	20.3884	20.0145	19.9536
DNA-Genome-Picea-abies-GCA_900067695.1-2016-11-09.one_line	11960690255	750	5	ACTGN_13333	4500	25.2222	26.6889	26.5778	28.6444	32.1111	30.2444	30.5778
DNA-NCBI-Virus-Complete-Nucleotide-Human-2020-05-11.one_line	470877038	750	5	ACTGN_13333	3000	23.6333	23.2	24.8667	26.6333	32	28.5	28.9333
DNA-Genome-Strongylocentrotus-purpuratus-GCF_000002235.4-2015-03-10.one_line	659082267	750	5	ACTGN_13333	1500	28	28	30.1333	31.2667	44.2667	37.3333	39.4667
DNA-Influenza-2019-04-27.one_line	1106180040	750	5	ACTGN_13333	750	29.0667	24.8	31.7333	30.2667	53.3333	38.6667	42.6667
DNA-Helicobacter-2019-04-24.one_line	2711601413	1000	5	ACTGN_13333	28000	18.7357	16.6036	18.9214	20.5107	18.7929	18.0786	18.1143
DNA-NCBI-Virus-Complete-Nucleotide-Human-2020-05-11.one_line	470877038	1000	5	ACTGN_13333	3000	23.2667	18.1667	21.7333	25.1333	26.8333	23.0667	24.1333
DNA-Genome-Picea-abies-GCA_900067695.1-2016-11-09.one_line	11960690255	1000	5	ACTGN_13333	1000	29.9	27	32.4	33.3	48.3	37.4	40.8
DNA-Genome-Strongylocentrotus-purpuratus-GCF_000002235.4-2015-03-10.one_line	659082267	1000	5	ACTGN_13333	1000	30.1	28.1	33	33.6	51.2	40.8	44
DNA-Helicobacter-2019-04-24.one_line	2711601413	2500	5	ACTGN_13333	25000	16.404	13.104	16.368	17.688	14.98	14.604	14.624
DNA-NCBI-Virus-Complete-Nucleotide-Human-2020-05-11.one_line	470877038	2500	5	ACTGN_13333	5000	22.04	17.92	21.2	24.5	23.72	21.48	22
DNA-Helicobacter-2019-04-24.one_line	2711601413	5000	5	ACTGN_13333	5000	20.6	17.9	20.12	22.72	23.22	21.14	21.76
DNA-Genome-Picea-abies-GCA_900067695.1-2016-11-09.one_line	11960690255	25	5	ACTGN_22233	826950	25.229	27.1785	25.9397	28.6171	27.4099	27.439	27.4101
DNA-Genome-Strongylocentrotus-purpuratus-GCF_000002235.4-2015-03-10.one_line	659082267	25	5	ACTGN_22233	245650	26.0839	27.5604	26.9139	29.5294	29.1215	29.113	29.0934
DNA-Helicobacter-2019-04-24.one_line	2711601413	25	5	ACTGN_22233	17375	25.8475	27.2115	27.177	29.3583	30.1871	29.8129	29.7669
DNA-Influenza-2019-04-27.one_line	1106180040	25	5	ACTGN_22233	17100	25.8012	24.6199	26.7719	28.3216	28.4152	27.8304	28
DNA-NCBI-Virus-Complete-Nucleotide-Human-2020-05-11.one_line	470877038	25	5	ACTGN_22233	11150	24.565	21.8296	25.435	26.6547	27.139	25.6951	25.8655
DNA-Mitochondrion-2019-03-15.one_line	241606731	25	5	ACTGN_22233	7775	27.6399	27.3055	29.4791	30.9968	34.5209	33.4662	33.5949
DNA-Genome-Astrammina-rara-GCA_000211355.2-2011-04-27.one_line	1362918	25	5	ACTGN_22233	2625	29.6	28.4571	32.1524	32.9905	42.1333	38.0571	39.4667
DNA-Genome-Salpingoeca-rosetta-GCA_000188695.1-2011-02-10.one_line	37299580	25	5	ACTGN_22233	1650	30.0606	29.5758	32.6061	33.5758	45.2121	38.7879	40.9697
DNA-Genome-Chondrus-crispus-GCA_000350225.2-2013-05-22.one_line	77592685	25	5	ACTGN_22233	1100	32.5455	29.0909	35.6364	35.8182	52.9091	43.4545	46.5455
DNA-Genome-Fusarium-graminearum-PH-1-GCF_000240135.3-2008-11-21.one_line	34133023	25	5	ACTGN_22233	350	43.4286	32.2857	49.7143	44.2857	87.1429	57.7143	67.4286
DNA-Genome-Cryptosporidium-parvum-Iowa-II-GCA_000165345.1-2007-02-26.one_line	7012512	25	5	ACTGN_22233	200	53	35.5	65	52.5	124.5	72.5	90
DNA-Genome-Spironucleus-salmonicida-GCA_000497125.1-2013-11-19.one_line	9934367	25	5	ACTGN_22233	150	61.3333	39.3333	77.3333	63.3333	148.667	79.3333	101.333
DNA-Genome-WS1-bacterium-JGI-0000059-K21-GCA_000398605.1-2013-05-16.one_line	509551	25	5	ACTGN_22233	50	104	58	160	118	370	144	200
DNA-Genome-Picea-abies-GCA_900067695.1-2016-11-09.one_line	11960690255	50	5	ACTGN_22233	3246500	23.4438	24.5222	23.8769	27.0641	24.1289	24.1008	24.1109
DNA-Genome-Strongylocentrotus-purpuratus-GCF_000002235.4-2015-03-10.one_line	659082267	50	5	ACTGN_22233	773450	25.0654	27.133	25.7987	28.3788	27.631	27.6307	27.6072
DNA-Helicobacter-2019-04-24.one_line	2711601413	50	5	ACTGN_22233	55700	23.9533	25.6984	24.8546	27.3519	27.0233	26.7648	26.8223
DNA-Influenza-2019-04-27.one_line	1106180040	50	5	ACTGN_22233	37900	23.496	21.1451	23.9367	25.5462	23.3879	22.4195	22.6913
DNA-NCBI-Virus-Complete-Nucleotide-Human-2020-05-11.one_line	470877038	50	5	ACTGN_22233	30850	21.3258	18.0032	21.5754	22.9498	21.0794	20.0681	20.0843
DNA-Mitochondrion-2019-03-15.one_line	241606731	50	5	ACTGN_22233	21700	26.1152	25.9539	27.2627	29.2857	29.7005	29.1797	29.2535
DNA-Genome-Astrammina-rara-GCA_000211355.2-2011-04-27.one_line	1362918	50	5	ACTGN_22233	7700	27.2857	27.6883	29.039	30.6883	34.4416	33.4156	33.5584
DNA-Genome-Salpingoeca-rosetta-GCA_000188695.1-2011-02-10.one_line	37299580	50	5	ACTGN_22233	5000	25.86	28.02	27.56	29.2	34.78	32.78	33.36
DNA-Genome-Chondrus-crispus-GCA_000350225.2-2013-05-22.one_line	77592685	50	5	ACTGN_22233	4000	26.55	28.05	28.35	30.15	35.85	33.25	34.1
DNA-Genome-Fusarium-graminearum-PH-1-GCF_000240135.3-2008-11-21.one_line	34133023	50	5	ACTGN_22233	1400	30.0714	29.9286	32.7143	33.3571	46.7143	39.7857	41.7143
DNA-Genome-Spironucleus-salmonicida-GCA_000497125.1-2013-11-19.one_line	9934367	50	5	ACTGN_22233	800	33.5	31.125	36.25	36.25	56.5	43.5	47.5
DNA-Genome-Cryptosporidium-parvum-Iowa-II-GCA_000165345.1-2007-02-26.one_line	7012512	50	5	ACTGN_22233	350	43.4286	33.4286	49.7143	44.8571	86.5714	56.8571	66.2857
DNA-Genome-Picea-abies-GCA_900067695.1-2016-11-09.one_line	11960690255	100	5	ACTGN_22233	7899300	22.5914	21.9681	22.8461	26.5009	21.5277	21.5672	21.5193
DNA-Genome-Strongylocentrotus-purpuratus-GCF_000002235.4-2015-03-10.one_line	659082267	100	5	ACTGN_22233	1937000	24.3032	26.3864	24.8565	27.3639	26.5156	26.6114	26.5026
DNA-Helicobacter-2019-04-24.one_line	2711601413	100	5	ACTGN_22233	250100	22.5738	24.1192	23.1515	25.483	24.3247	24.2311	24.1695
DNA-NCBI-Virus-Complete-Nucleotide-Human-2020-05-11.one_line	470877038	100	5	ACTGN_22233	72600	18.0909	14.3416	18.0689	19.2782	16.1446	15.5854	15.5427
DNA-Influenza-2019-04-27.one_line	1106180040	100	5	ACTGN_22233	70400	19.8452	16.179	19.9602	21.3111	17.9304	16.7088	16.7102
DNA-Mitochondrion-2019-03-15.one_line	241606731	100	5	ACTGN_22233	55800	25.1075	24.8405	25.8136	28.0341	26.7491	26.3118	26.3871
DNA-Genome-Astrammina-rara-GCA_000211355.2-2011-04-27.one_line	1362918	100	5	ACTGN_22233	17500	26.2171	27.6571	27.3257	29.0857	31.2514	30.9886	30.8571
DNA-Genome-Salpingoeca-rosetta-GCA_000188695.1-2011-02-10.one_line	37299580	100	5	ACTGN_22233	10000	24.59	26.71	25.74	27.66	30.65	30.12	29.88
DNA-Genome-Chondrus-crispus-GCA_000350225.2-2013-05-22.one_line	77592685	100	5	ACTGN_22233	9800	24.6531	26.5408	25.8776	27.8163	30.398	29.6633	29.6735
DNA-Genome-Fusarium-graminearum-PH-1-GCF_000240135.3-2008-11-21.one_line	34133023	100	5	ACTGN_22233	3300	26.2121	27.2727	27.7576	30.0303	36.6364	33.6667	34.5455
DNA-Genome-Spironucleus-salmonicida-GCA_000497125.1-2013-11-19.one_line	9934367	100	5	ACTGN_22233	2500	26.48	26.64	28.4	29.84	38.16	34.12	35.2
DNA-Genome-Cryptosporidium-parvum-Iowa-II-GCA_000165345.1-2007-02-26.one_line	7012512	100	5	ACTGN_22233	300	44.3333	32	52	47	94	59.3333	70.6667
DNA-Genome-Picea-abies-GCA_900067695.1-2016-11-09.one_line	11960690255	125	5	ACTGN_22233	10149000	22.445	21.5264	22.6667	26.4926	21.0185	21.0839	20.9947
DNA-Genome-Strongylocentrotus-purpuratus-GCF_000002235.4-2015-03-10.one_line	659082267	125	5	ACTGN_22233	2771000	23.8837	25.9949	24.3786	26.8485	25.9654	25.9685	25.9326
DNA-Helicobacter-2019-04-24.one_line	2711601413	125	5	ACTGN_22233	359250	22.0515	22.92	22.5442	24.6714	23.1449	22.9347	22.7608
DNA-NCBI-Virus-Complete-Nucleotide-Human-2020-05-11.one_line	470877038	125	5	ACTGN_22233	90875	17.589	14.137	17.5692	18.7774	15.7612	15.3981	15.2341
DNA-Influenza-2019-04-27.one_line	1106180040	125	5	ACTGN_22233	79250	19.0397	14.9527	19.1243	20.3987	15.9659	15.4574	15.3792
DNA-Mitochondrion-2019-03-15.one_line	241606731	125	5	ACTGN_22233	70000	24.8671	24.3714	25.5571	27.7114	25.7429	25.2657	25.4971
DNA-Genome-Astrammina-rara-GCA_000211355.2-2011-04-27.one_line	1362918	125	5	ACTGN_22233	23625	25.9386	27.1831	26.9037	28.7873	30.1291	29.6847	29.8159
DNA-Genome-Salpingoeca-rosetta-GCA_000188695.1-2011-02-10.one_line	37299580	125	5	ACTGN_22233	14250	24.1333	26.4281	25.1088	27.2912	29.6561	28.9825	28.9404
DNA-Genome-Chondrus-crispus-GCA_000350225.2-2013-05-22.one_line	77592685	125	5	ACTGN_22233	12625	24.0634	26.1149	25.1723	27.1683	29.7188	29.1248	29.0218
DNA-Genome-Fusarium-graminearum-PH-1-GCF_000240135.3-2008-11-21.one_line	34133023	125	5	ACTGN_22233	4500	25.5111	26.9111	26.8889	28.7111	34.5556	32.1778	32.6222
DNA-Genome-Spironucleus-salmonicida-GCA_000497125.1-2013-11-19.one_line	9934367	125	5	ACTGN_22233	4250	24.4471	25.9765	25.9765	27.3412	33.1077	31.5294	32.0941
DNA-Genome-Cryptosporidium-parvum-Iowa-II-GCA_000165345.1-2007-02-26.one_line	7012512	125	5	ACTGN_22233	500	36.6	29.8	42	39.4	71.4	50.6	57.6
DNA-Genome-Picea-abies-GCA_900067695.1-2016-11-09.one_line	11960690255	150	5	ACTGN_22233	12371850	22.3809	21.2916	22.5787	26.5311	20.7086	20.8147	20.7281
DNA-Genome-Strongylocentrotus-purpuratus-GCF_000002235.4-2015-03-10.one_line	659082267	150	5	ACTGN_22233	4991250	23.0763	25.2305	23.5196	25.8863	24.964	25.0205	24.9562
DNA-Helicobacter-2019-04-24.one_line	2711601413	150	5	ACTGN_22233	465450	21.8483	22.2963	22.2473	24.2864	22.5223	22.24	22.0604
DNA-NCBI-Virus-Complete-Nucleotide-Human-2020-05-11.one_line	470877038	150	5	ACTGN_22233	114750	17.0248	13.3508	16.7495	18.1281	14.6065	14.2963	14.2222
DNA-Influenza-2019-04-27.one_line	1106180040	150	5	ACTGN_22233	95250	18.1711	13.8394	18.1396	19.2294	15.2861	14.3055	14.2026
DNA-Mitochondrion-2019-03-15.one_line	241606731	150	5	ACTGN_22233	93000	24.5516	23.7237	25.1075	27.2742	24.7925	24.4226	24.4946
DNA-Genome-Astrammina-rara-GCA_000211355.2-2011-04-27.one_line	1362918	150	5	ACTGN_22233	26250	25.8629	27.2876	26.7733	28.5905	29.9733	29.5505	29.699
DNA-Genome-Chondrus-crispus-GCA_000350225.2-2013-05-22.one_line	77592685	150	5	ACTGN_22233	15300	24.0588	26.2353	24.9542	27.0915	29.634	28.7843	28.915
DNA-Genome-Salpingoeca-rosetta-GCA_000188695.1-2011-02-10.one_line	37299580	150	5	ACTGN_22233	15150	23.835	25.9538	24.7525	26.9175	28.9967	28.363	28.3036
DNA-Genome-Spironucleus-salmonicida-GCA_000497125.1-2013-11-19.one_line	9934367	150	5	ACTGN_22233	6750	24.5037	26.4889	25.7185	27.3037	32.5946	30.963	31.1704
DNA-Genome-Fusarium-graminearum-PH-1-GCF_000240135.3-2008-11-21.one_line	34133023	150	5	ACTGN_22233	4950	24.9495	26.2626	26.1818	27.7374	33.2323	31.2727	31.3535
DNA-Genome-Cryptosporidium-parvum-Iowa-II-GCA_000165345.1-2007-02-26.one_line	7012512	150	5	ACTGN_22233	750	33.8667	29.7333	37.6	37.6	59.3333	45.6	50.1333
DNA-Genome-Picea-abies-GCA_900067695.1-2016-11-09.one_line	11960690255	250	5	ACTGN_22233	21763500	22.5888	20.7106	22.2819	26.6235	19.8782	20.2991	20.2135
DNA-Genome-Strongylocentrotus-purpuratus-GCF_000002235.4-2015-03-10.one_line	659082267	250	5	ACTGN_22233	9907500	23.298	25.2841	23.6498	26.0382	24.7492	24.7593	24.7314
DNA-Helicobacter-2019-04-24.one_line	2711601413	250	5	ACTGN_22233	801000	21.5015	21.1395	21.7069	23.7258	20.9295	20.925	20.7521
DNA-NCBI-Virus-Complete-Nucleotide-Human-2020-05-11.one_line	470877038	250	5	ACTGN_22233	202000	14.5817	10.7089	13.799	15.3149	11.7545	11.5129	11.3802
DNA-Mitochondrion-2019-03-15.one_line	241606731	250	5	ACTGN_22233	153000	24.1458	22.6935	24.4797	26.6327	23.1549	22.7516	22.8523
DNA-Influenza-2019-04-27.one_line	1106180040	250	5	ACTGN_22233	132250	15.9645	11.2975	15.7474	16.8605	12.3622	11.6408	11.5357
DNA-Genome-Astrammina-rara-GCA_000211355.2-2011-04-27.one_line	1362918	250	5	ACTGN_22233	49000	25.4143	27.0306	26.0776	28.0388	28.7082	28.449	28.5469
DNA-Genome-Chondrus-crispus-GCA_000350225.2-2013-05-22.one_line	77592685	250	5	ACTGN_22233	32500	23.4646	25.7569	24.1354	26.1631	27.5569	27.3077	27.2738
DNA-Genome-Salpingoeca-rosetta-GCA_000188695.1-2011-02-10.one_line	37299580	250	5	ACTGN_22233	26250	23.5314	25.8933	24.221	26.3505	27.6686	27.3029	27.2305
DNA-Genome-Fusarium-graminearum-PH-1-GCF_000240135.3-2008-11-21.one_line	34133023	250	5	ACTGN_22233	9750	24	25.9077	24.9026	26.4821	30.3487	28.9641	28.9641
DNA-Genome-Spironucleus-salmonicida-GCA_000497125.1-2013-11-19.one_line	9934367	250	5	ACTGN_22233	8750	24.4457	26.5714	25.5543	27.3829	30.219	30.2743	30.3086
DNA-Genome-Cryptosporidium-parvum-Iowa-II-GCA_000165345.1-2007-02-26.one_line	7012512	250	5	ACTGN_22233	1250	29.84	28.8	32.16	33.2	47.92	39.36	41.92
DNA-Genome-Picea-abies-GCA_900067695.1-2016-11-09.one_line	11960690255	500	5	ACTGN_22233	45081000	22.7297	20.2389	22.5349	26.7185	18.7973	19.9088	19.8316
DNA-Genome-Strongylocentrotus-purpuratus-GCF_000002235.4-2015-03-10.one_line	659082267	500	5	ACTGN_22233	23064500	23.4995	24.9137	23.6779	26.1779	24.1525	24.3757	24.3355
DNA-Helicobacter-2019-04-24.one_line	2711601413	500	5	ACTGN_22233	1680500	21.1217	19.9126	21.1217	23.568	19.5143	19.5691	19.4306
DNA-NCBI-Virus-Complete-Nucleotide-Human-2020-05-11.one_line	470877038	500	5	ACTGN_22233	474500	10.6854	7.2181	10.1871	11.1505	7.8721	7.7176	7.5987
DNA-Mitochondrion-2019-03-15.one_line	241606731	500	5	ACTGN_22233	308000	23.3279	20.6883	23.5591	25.5705	20.4516	20.238	20.2714
DNA-Influenza-2019-04-27.one_line	1106180040	500	5	ACTGN_22233	174000	14.5213	9.5121	14.1805	15.2695	10.2282	9.8178	9.6897
DNA-Genome-Astrammina-rara-GCA_000211355.2-2011-04-27.one_line	1362918	500	5	ACTGN_22233	108500	25.0912	27.0295	25.5797	27.694	27.765	27.5788	27.5871
DNA-Genome-Chondrus-crispus-GCA_000350225.2-2013-05-22.one_line	77592685	500	5	ACTGN_22233	85500	22.8292	24.9064	23.3053	25.3111	26.0936	25.7205	25.5392
DNA-Genome-Fusarium-graminearum-PH-1-GCF_000240135.3-2008-11-21.one_line	34133023	500	5	ACTGN_22233	33000	22.7909	24.9758	23.3273	25.1121	26.9818	26.5455	26.497
DNA-Genome-Salpingoeca-rosetta-GCA_000188695.1-2011-02-10.one_line	37299580	500	5	ACTGN_22233	27500	22.8327	24.84	23.4545	25.2982	26.6655	26.1709	26.0655
DNA-Genome-Spironucleus-salmonicida-GCA_000497125.1-2013-11-19.one_line	9934367	500	5	ACTGN_22233	23000	24.3304	25.6391	24.6609	26.7696	28.0844	27.313	27.3565
DNA-Genome-Cryptosporidium-parvum-Iowa-II-GCA_000165345.1-2007-02-26.one_line	7012512	500	5	ACTGN_22233	1000	28.4	24.1	29.6	29.3	46	34.7	38
DNA-Genome-Picea-abies-GCA_900067695.1-2016-11-09.one_line	11960690255	750	5	ACTGN_22233	67786500	22.8434	20.1204	22.692	26.7703	18.2388	19.8175	19.7685
DNA-Genome-Strongylocentrotus-purpuratus-GCF_000002235.4-2015-03-10.one_line	659082267	750	5	ACTGN_22233	33566250	23.6836	24.8771	23.8158	26.3425	23.9459	24.3434	24.3161
DNA-Helicobacter-2019-04-24.one_line	2711601413	750	5	ACTGN_22233	2579250	20.781	18.9605	20.7029	23.3802	18.4752	18.589	18.4365
DNA-NCBI-Virus-Complete-Nucleotide-Human-2020-05-11.one_line	470877038	750	5	ACTGN_22233	701250	9.6426	6.3991	9.1445	10.0165	6.9549	6.774	6.6869
DNA-Mitochondrion-2019-03-15.one_line	241606731	750	5	ACTGN_22233	466500	22.8084	19.6448	22.8827	24.9153	19.1301	18.9085	19.0259
DNA-Genome-Chondrus-crispus-GCA_000350225.2-2013-05-22.one_line	77592685	750	5	ACTGN_22233	192000	22.5578	24.7318	22.8885	24.9724	25.0818	25.1766	24.8458
DNA-Influenza-2019-04-27.one_line	1106180040	750	5	ACTGN_22233	180000	12.1456	7.7139	11.8622	12.6983	8.3694	8.0978	7.9356
DNA-Genome-Astrammina-rara-GCA_000211355.2-2011-04-27.one_line	1362918	750	5	ACTGN_22233	163500	25.0128	26.9957	25.4177	27.5058	27.5792	27.2966	27.4618
DNA-Genome-Fusarium-graminearum-PH-1-GCF_000240135.3-2008-11-21.one_line	34133023	750	5	ACTGN_22233	75750	22.3617	24.7089	22.8066	24.6706	25.4944	25.4878	25.2726
DNA-Genome-Salpingoeca-rosetta-GCA_000188695.1-2011-02-10.one_line	37299580	750	5	ACTGN_22233	50250	22.4975	25.0587	22.9612	24.9154	25.797	25.7234	25.7035
DNA-Genome-Spironucleus-salmonicida-GCA_000497125.1-2013-11-19.one_line	9934367	750	5	ACTGN_22233	33000	24.3515	25.3152	24.1152	26.8061	26.6701	26.597	26.5455
DNA-Genome-Cryptosporidium-parvum-Iowa-II-GCA_000165345.1-2007-02-26.one_line	7012512	750	5	ACTGN_22233	3750	23.04	23.1733	24.2667	25.8667	31.28	28.32	29.0133
DNA-Genome-Picea-abies-GCA_900067695.1-2016-11-09.one_line	11960690255	1000	5	ACTGN_22233	89955000	22.9965	20.1137	22.8054	26.7901	17.9227	19.8282	19.7685
DNA-Genome-Strongylocentrotus-purpuratus-GCF_000002235.4-2015-03-10.one_line	659082267	1000	5	ACTGN_22233	42981000	23.7832	24.8324	23.864	26.4208	23.7597	24.2959	24.2722
DNA-Helicobacter-2019-04-24.one_line	2711601413	1000	5	ACTGN_22233	3417000	20.5132	18.1789	20.3755	23.3957	17.6872	17.7752	17.6416
DNA-NCBI-Virus-Complete-Nucleotide-Human-2020-05-11.one_line	470877038	1000	5	ACTGN_22233	860000	8.8051	5.5521	8.3681	9.0702	6.0576	5.8987	5.8293
DNA-Mitochondrion-2019-03-15.one_line	241606731	1000	5	ACTGN_22233	613000	22.509	18.9411	22.4519	24.5054	18.4155	18.2927	18.2773
DNA-Genome-Chondrus-crispus-GCA_000350225.2-2013-05-22.one_line	77592685	1000	5	ACTGN_22233	254000	22.9197	25.2232	23.2528	25.3205	25.3646	25.5539	25.1843
DNA-Genome-Astrammina-rara-GCA_000211355.2-2011-04-27.one_line	1362918	1000	5	ACTGN_22233	199000	24.9849	27.0035	25.3608	27.4407	27.3518	27.2186	27.3166
DNA-Influenza-2019-04-27.one_line	1106180040	1000	5	ACTGN_22233	187000	10.5294	6.5556	10.3508	10.9861	7.1909	6.9112	6.8278
DNA-Genome-Fusarium-graminearum-PH-1-GCF_000240135.3-2008-11-21.one_line	34133023	1000	5	ACTGN_22233	89000	22.9449	25.382	23.3393	25.1573	26.2056	26.0011	25.7798
DNA-Genome-Spironucleus-salmonicida-GCA_000497125.1-2013-11-19.one_line	9934367	1000	5	ACTGN_22233	51000	24.1216	25.1333	23.949	26.3608	26.2741	25.9588	25.9451
DNA-Genome-Salpingoeca-rosetta-GCA_000188695.1-2011-02-10.one_line	37299580	1000	5	ACTGN_22233	49000	22.6306	24.4592	22.9755	24.9224	25.4061	25.0898	25.2
DNA-Genome-Cryptosporidium-parvum-Iowa-II-GCA_000165345.1-2007-02-26.one_line	7012512	1000	5	ACTGN_22233	5000	23.26	23.24	24.36	26	30.32	28.36	28.56
DNA-Genome-Picea-abies-GCA_900067695.1-2016-11-09.one_line	11960690255	2500	5	ACTGN_22233	208352500	23.3014	20.4285	23.1236	26.846	17.6115	20.0636	20.0465
DNA-Genome-Strongylocentrotus-purpuratus-GCF_000002235.4-2015-03-10.one_line	659082267	2500	5	ACTGN_22233	87437500	23.8926	24.7514	23.9286	26.4603	23.232	24.1471	24.1218
DNA-Helicobacter-2019-04-24.one_line	2711601413	2500	5	ACTGN_22233	8717500	19.23	15.413	18.9927	23.6664	14.8747	14.9662	14.8602
DNA-NCBI-Virus-Complete-Nucleotide-Human-2020-05-11.one_line	470877038	2500	5	ACTGN_22233	1817500	8.3169	4.9804	7.7777	8.7756	5.2782	5.2092	5.1572
DNA-Mitochondrion-2019-03-15.one_line	241606731	2500	5	ACTGN_22233	1347500	21.595	17.2656	21.5534	24.2159	16.7643	16.6907	16.7273
DNA-Genome-Chondrus-crispus-GCA_000350225.2-2013-05-22.one_line	77592685	2500	5	ACTGN_22233	555000	23.7315	25.92	23.9719	26.1222	25.5614	25.5227	25.3564
DNA-Genome-Astrammina-rara-GCA_000211355.2-2011-04-27.one_line	1362918	2500	5	ACTGN_22233	385000	24.9127	27.1803	25.2722	27.3571	26.9369	27.1296	26.9039
DNA-Genome-Fusarium-graminearum-PH-1-GCF_000240135.3-2008-11-21.one_line	34133023	2500	5	ACTGN_22233	255000	23.4224	25.9871	23.6651	25.6302	25.9737	26.0969	25.9451
DNA-Influenza-2019-04-27.one_line	1106180040	2500	5	ACTGN_22233	240000	6.8375	3.7279	6.565	7.0292	4.2458	4.1975	4.065
DNA-Genome-Spironucleus-salmonicida-GCA_000497125.1-2013-11-19.one_line	9934367	2500	5	ACTGN_22233	160000	23.8413	24.6975	23.8238	26.1819	25.3968	25.0613	25.0075
DNA-Genome-Salpingoeca-rosetta-GCA_000188695.1-2011-02-10.one_line	37299580	2500	5	ACTGN_22233	25000	22.656	22.652	23.048	24.868	24.06	23.796	23.696
DNA-Genome-Cryptosporidium-parvum-Iowa-II-GCA_000165345.1-2007-02-26.one_line	7012512	2500	5	ACTGN_22233	2500	23.84	22.72	24.96	26.16	33.28	28.64	29.92
DNA-Genome-Picea-abies-GCA_900067695.1-2016-11-09.one_line	11960690255	5000	5	ACTGN_22233	376885000	23.4884	20.8206	23.407	26.8641	17.7718	20.397	20.4096
DNA-Genome-Strongylocentrotus-purpuratus-GCF_000002235.4-2015-03-10.one_line	659082267	5000	5	ACTGN_22233	136340000	23.7992	24.5391	23.8303	26.3105	22.8472	23.889	23.8661
DNA-Helicobacter-2019-04-24.one_line	2711601413	5000	5	ACTGN_22233	16945000	18.1562	13.4741	17.8357	24.3073	12.9171	13.179	13.0559
DNA-NCBI-Virus-Complete-Nucleotide-Human-2020-05-11.one_line	470877038	5000	5	ACTGN_22233	2765000	7.5829	4.3025	7.1696	8.8669	4.4995	4.4835	4.4286
DNA-Mitochondrion-2019-03-15.one_line	241606731	5000	5	ACTGN_22233	2380000	20.7759	16.3116	20.721	23.8428	15.8221	15.8173	15.784
DNA-Genome-Chondrus-crispus-GCA_000350225.2-2013-05-22.one_line	77592685	5000	5	ACTGN_22233	1040000	23.8125	25.4436	23.9581	26.1258	24.9122	25.102	24.78
DNA-Genome-Fusarium-graminearum-PH-1-GCF_000240135.3-2008-11-21.one_line	34133023	5000	5	ACTGN_22233	675000	23.6579	26.3683	23.875	25.8754	25.7739	26.2532	25.6231
DNA-Genome-Astrammina-rara-GCA_000211355.2-2011-04-27.one_line	1362918	5000	5	ACTGN_22233	480000	24.8998	27.2119	25.2125	27.3723	26.8221	26.9498	26.9467
DNA-Genome-Spironucleus-salmonicida-GCA_000497125.1-2013-11-19.one_line	9934367	5000	5	ACTGN_22233	405000	23.5299	24.7091	23.5748	25.902	24.8563	24.7168	24.479
DNA-Influenza-2019-04-27.one_line	1106180040	5000	5	ACTGN_22233	345000	5.3904	2.6629	5.1397	5.4513	3.0359	3.0406	2.9252
DNA-Genome-Salpingoeca-rosetta-GCA_000188695.1-2011-02-10.one_line	37299580	5000	5	ACTGN_22233	30000	21.5367	18.5433	21.4067	23.4333	20.1667	19.8267	19.88
DNA-Genome-Cryptosporidium-parvum-Iowa-II-GCA_000165345.1-2007-02-26.one_line	7012512	5000	5	ACTGN_22233	20000	23.55	25.755	24.36	26.465	27.525	27.28	27.22
DNA-Genome-Picea-abies-GCA_900067695.1-2016-11-09.one_line	11960690255	10000	5	ACTGN_22233	672510000	23.5986	21.1887	23.5817	26.8542	18.0282	20.7159	20.7427
DNA-Genome-Strongylocentrotus-purpuratus-GCF_000002235.4-2015-03-10.one_line	659082267	10000	5	ACTGN_22233	189030000	23.6697	24.3803	23.7121	26.1371	22.6512	23.6906	23.6651
DNA-Helicobacter-2019-04-24.one_line	2711601413	10000	5	ACTGN_22233	32480000	18.1351	11.7075	17.2097	24.8941	11.0933	11.8032	11.6899
DNA-Mitochondrion-2019-03-15.one_line	241606731	10000	5	ACTGN_22233	4380000	20.1901	15.8095	20.1751	23.8959	15.3295	15.359	15.2914
DNA-NCBI-Virus-Complete-Nucleotide-Human-2020-05-11.one_line	470877038	10000	5	ACTGN_22233	4270000	7.1144	4.0535	6.7304	8.7823	4.2244	4.2575	4.1825
DNA-Genome-Chondrus-crispus-GCA_000350225.2-2013-05-22.one_line	77592685	10000	5	ACTGN_22233	1770000	24.1843	25.7853	24.3401	26.5159	25.0914	25.0183	24.9403
DNA-Genome-Fusarium-graminearum-PH-1-GCF_000240135.3-2008-11-21.one_line	34133023	10000	5	ACTGN_22233	1390000	23.8785	26.5619	24.0489	26.1213	25.6843	26.0188	25.6458
DNA-Genome-Spironucleus-salmonicida-GCA_000497125.1-2013-11-19.one_line	9934367	10000	5	ACTGN_22233	670000	23.8182	25.1391	23.863	26.2469	24.8107	24.7081	24.6137
DNA-Genome-Astrammina-rara-GCA_000211355.2-2011-04-27.one_line	1362918	10000	5	ACTGN_22233	540000	24.8881	27.1681	25.1741	27.343	26.7887	26.8456	26.6104
DNA-Influenza-2019-04-27.one_line	1106180040	10000	5	ACTGN_22233	490000	4.1739	2.1459	4.0649	4.2194	2.4437	2.4418	2.3706
DNA-Genome-Cryptosporidium-parvum-Iowa-II-GCA_000165345.1-2007-02-26.one_line	7012512	10000	5	ACTGN_22233	50000	22.64	25.084	23.276	25.676	25.882	25.912	25.768
DNA-Genome-Salpingoeca-rosetta-GCA_000188695.1-2011-02-10.one_line	37299580	10000	5	ACTGN_22233	10000	21.7	23.95	22.58	24.17	26.91	26.13	26.28
DNA-Genome-Picea-abies-GCA_900067695.1-2016-11-09.one_line	11960690255	25	5	AGCTN_12344	26375	24.4209	25.2929	25.8199	28.6028	29.1033	28.7128	28.8455
DNA-Genome-Strongylocentrotus-purpuratus-GCF_000002235.4-2015-03-10.one_line	659082267	25	5	AGCTN_12344	9900	25.3939	25.0606	27.3737	29.6768	31.9697	31.202	31.2727
DNA-Influenza-2019-04-27.one_line	1106180040	25	5	AGCTN_12344	4575	24.1093	22.4262	25.5301	26.9945	30.3825	27.9781	28.765
DNA-NCBI-Virus-Complete-Nucleotide-Human-2020-05-11.one_line	470877038	25	5	AGCTN_12344	1300	28.6923	23.3846	30.7692	30.6923	42.6923	34.6154	37.2308
DNA-Helicobacter-2019-04-24.one_line	2711601413	25	5	AGCTN_12344	825	31.3939	26.4242	34.9091	35.2727	54.5455	42.0606	46.0606
DNA-Mitochondrion-2019-03-15.one_line	241606731	25	5	AGCTN_12344	400	38.25	29	44.5	41.75	76.25	50.5	59
DNA-Genome-Salpingoeca-rosetta-GCA_000188695.1-2011-02-10.one_line	37299580	25	5	AGCTN_12344	200	50	34	62	48	118	66	82
DNA-Genome-Astrammina-rara-GCA_000211355.2-2011-04-27.one_line	1362918	25	5	AGCTN_12344	150	56.6667	36.6667	73.3333	61.3333	146.667	76.6667	98.6667
DNA-Genome-Chondrus-crispus-GCA_000350225.2-2013-05-22.one_line	77592685	25	5	AGCTN_12344	50	102	58	160	114	370	132	192
DNA-Genome-Picea-abies-GCA_900067695.1-2016-11-09.one_line	11960690255	50	5	AGCTN_12344	52900	23.6975	24.8147	24.7486	27.4178	26.8677	26.7183	26.7826
DNA-Influenza-2019-04-27.one_line	1106180040	50	5	AGCTN_12344	10750	22.093	20.0372	22.9209	24.2605	24.6419	22.6884	23.1442
DNA-Genome-Strongylocentrotus-purpuratus-GCF_000002235.4-2015-03-10.one_line	659082267	50	5	AGCTN_12344	10450	25.2153	25.8086	26.9665	29.4545	31.6172	30.7751	30.9282
DNA-NCBI-Virus-Complete-Nucleotide-Human-2020-05-11.one_line	470877038	50	5	AGCTN_12344	2050	27.9024	25.8537	30.0488	30.5854	39.6098	34.3415	35.9024
DNA-Helicobacter-2019-04-24.one_line	2711601413	50	5	AGCTN_12344	1500	28.3333	26.8	30.4	32.0667	43.3333	36.4667	38.6667
DNA-Mitochondrion-2019-03-15.one_line	241606731	50	5	AGCTN_12344	350	40.2857	29.7143	46.8571	43.1429	81.1429	51.7143	60.5714
DNA-Genome-Salpingoeca-rosetta-GCA_000188695.1-2011-02-10.one_line	37299580	50	5	AGCTN_12344	300	42.6667	30.6667	50.6667	44.6667	93.3333	58.3333	69.3333
DNA-Genome-Astrammina-rara-GCA_000211355.2-2011-04-27.one_line	1362918	50	5	AGCTN_12344	200	50.5	33.5	63	52.5	120	68	84
DNA-Genome-Chondrus-crispus-GCA_000350225.2-2013-05-22.one_line	77592685	50	5	AGCTN_12344	50	98	60	156	122	370	126	184
DNA-Genome-Picea-abies-GCA_900067695.1-2016-11-09.one_line	11960690255	100	5	AGCTN_12344	109800	22.6876	22.3907	23.3352	25.7104	23.6976	23.3852	23.4681
DNA-Influenza-2019-04-27.one_line	1106180040	100	5	AGCTN_12344	14400	18.4097	15.1042	18.7222	19.7569	19.3056	16.9931	17.2778
DNA-Genome-Strongylocentrotus-purpuratus-GCF_000002235.4-2015-03-10.one_line	659082267	100	5	AGCTN_12344	9600	25.1458	26.0729	26.7708	29.0521	31.4688	30.6875	30.75
DNA-NCBI-Virus-Complete-Nucleotide-Human-2020-05-11.one_line	470877038	100	5	AGCTN_12344	2700	24.4444	19.4815	25.3333	26.5556	29.8148	25.2593	26.5185
DNA-Helicobacter-2019-04-24.one_line	2711601413	100	5	AGCTN_12344	1900	26.8947	25.4737	28.9474	31	39	33.5789	35.3684
DNA-Genome-Salpingoeca-rosetta-GCA_000188695.1-2011-02-10.one_line	37299580	100	5	AGCTN_12344	500	35.4	29.4	39.6	37.6	67.6	46.8	53.6
DNA-Mitochondrion-2019-03-15.one_line	241606731	100	5	AGCTN_12344	400	38.75	27.75	44.5	41.5	74.5	48.75	57
DNA-Genome-Astrammina-rara-GCA_000211355.2-2011-04-27.one_line	1362918	100	5	AGCTN_12344	400	39.25	30.5	46	42.75	81.75	55.75	64
DNA-Genome-Chondrus-crispus-GCA_000350225.2-2013-05-22.one_line	77592685	100	5	AGCTN_12344	200	51	35	63	52.5	120	68.5	84
DNA-Genome-Picea-abies-GCA_900067695.1-2016-11-09.one_line	11960690255	125	5	AGCTN_12344	118375	22.4769	22.1153	23.0623	25.3964	23.1197	22.9288	22.8866
DNA-Influenza-2019-04-27.one_line	1106180040	125	5	AGCTN_12344	17875	16.5762	13.0517	16.7385	17.6895	16.4587	14.758	14.814
DNA-Genome-Strongylocentrotus-purpuratus-GCF_000002235.4-2015-03-10.one_line	659082267	125	5	AGCTN_12344	7750	25.4581	25.9226	27.0194	29.3806	31.8968	30.8258	30.9677
DNA-NCBI-Virus-Complete-Nucleotide-Human-2020-05-11.one_line	470877038	125	5	AGCTN_12344	2125	27.0118	22.0706	28.3294	29.5059	34.9647	29.8353	31.2471
DNA-Helicobacter-2019-04-24.one_line	2711601413	125	5	AGCTN_12344	1625	27.6308	27.3231	29.7846	31.6308	41.7846	35.5077	37.4154
DNA-Mitochondrion-2019-03-15.one_line	241606731	125	5	AGCTN_12344	625	34.72	30.88	38.72	37.92	62.88	46.24	51.84
DNA-Genome-Salpingoeca-rosetta-GCA_000188695.1-2011-02-10.one_line	37299580	125	5	AGCTN_12344	500	36.2	30.8	41.6	39.4	70.2	49.4	56
DNA-Genome-Astrammina-rara-GCA_000211355.2-2011-04-27.one_line	1362918	125	5	AGCTN_12344	375	39.7333	30.6667	46.4	41.8667	82.4	54.4	64
DNA-Genome-Fusarium-graminearum-PH-1-GCF_000240135.3-2008-11-21.one_line	34133023	125	5	AGCTN_12344	125	61.6	40.8	81.6	66.4	163.2	80	102.4
DNA-Genome-Picea-abies-GCA_900067695.1-2016-11-09.one_line	11960690255	150	5	AGCTN_12344	126000	22.6095	22.4492	23.2111	25.4873	23.2738	22.9056	23.0667
DNA-Influenza-2019-04-27.one_line	1106180040	150	5	AGCTN_12344	15750	16.1714	11.5111	16.2794	17.1429	15.1302	13.4857	13.5111
DNA-Genome-Strongylocentrotus-purpuratus-GCF_000002235.4-2015-03-10.one_line	659082267	150	5	AGCTN_12344	7650	25.4641	26.0131	27.1373	29.2026	32.2353	31.0327	31.3203
DNA-NCBI-Virus-Complete-Nucleotide-Human-2020-05-11.one_line	470877038	150	5	AGCTN_12344	2100	26.9048	22.9524	28.4762	29.8571	36.2857	30.9524	32.381
DNA-Helicobacter-2019-04-24.one_line	2711601413	150	5	AGCTN_12344	1650	26.9697	25.3939	28.9697	30.6061	40.303	34	36.1212
DNA-Genome-Astrammina-rara-GCA_000211355.2-2011-04-27.one_line	1362918	150	5	AGCTN_12344	450	37.7778	30.2222	43.1111	41.5556	76	52.8889	60.4444
DNA-Mitochondrion-2019-03-15.one_line	241606731	150	5	AGCTN_12344	300	42.3333	32.3333	49.3333	45.6667	88.3333	53.6667	65.3333
DNA-Genome-Chondrus-crispus-GCA_000350225.2-2013-05-22.one_line	77592685	150	5	AGCTN_12344	150	58	38	73.3333	60.6667	146.667	77.3333	98.6667
DNA-Genome-Picea-abies-GCA_900067695.1-2016-11-09.one_line	11960690255	250	5	AGCTN_12344	144500	22.8948	22.8796	23.4145	25.7121	23.1993	22.9661	22.9343
DNA-Influenza-2019-04-27.one_line	1106180040	250	5	AGCTN_12344	8750	19.9657	13.8857	19.68	21.5771	17.6571	16.1943	16.7314
DNA-Genome-Strongylocentrotus-purpuratus-GCF_000002235.4-2015-03-10.one_line	659082267	250	5	AGCTN_12344	5500	24.6727	24.2182	26.1818	28.1273	31.2364	29.7818	29.9636
DNA-NCBI-Virus-Complete-Nucleotide-Human-2020-05-11.one_line	470877038	250	5	AGCTN_12344	2250	26.2222	20.5333	26.9333	28.2667	33.1111	27.8222	29.1556
DNA-Helicobacter-2019-04-24.one_line	2711601413	250	5	AGCTN_12344	1500	25.0667	21.6667	26.5333	27.8	36.4	29.4667	31.7333
DNA-Mitochondrion-2019-03-15.one_line	241606731	250	5	AGCTN_12344	250	44	28.8	51.2	46.4	94.8	53.2	67.2
DNA-Genome-Astrammina-rara-GCA_000211355.2-2011-04-27.one_line	1362918	250	5	AGCTN_12344	250	47.2	34	56	50	103.6	62	75.2
DNA-Genome-Picea-abies-GCA_900067695.1-2016-11-09.one_line	11960690255	500	5	AGCTN_12344	145500	22.9409	22.8392	23.3897	25.6646	22.3155	22.2048	22.1773
DNA-Helicobacter-2019-04-24.one_line	2711601413	500	5	AGCTN_12344	4500	21.0444	18.0667	21.2444	23.1333	23.7333	21.4667	22.1333
DNA-Influenza-2019-04-27.one_line	1106180040	500	5	AGCTN_12344	4000	19.05	11.65	18.15	19.975	17.9	15.225	16
DNA-Genome-Strongylocentrotus-purpuratus-GCF_000002235.4-2015-03-10.one_line	659082267	500	5	AGCTN_12344	3500	25.6571	26.7714	27.3143	29.2571	35	32.6286	33.0286
DNA-NCBI-Virus-Complete-Nucleotide-Human-2020-05-11.one_line	470877038	500	5	AGCTN_12344	1000	29.5	20.9	31.4	31.2	42.9	32.4	36
DNA-Genome-Picea-abies-GCA_900067695.1-2016-11-09.one_line	11960690255	750	5	AGCTN_12344	135750	22.9562	22.26	23.3576	25.5698	21.4851	21.284	21.4306
DNA-Influenza-2019-04-27.one_line	1106180040	750	5	AGCTN_12344	6000	18.1833	10.25	16.4667	19.3	15.0667	13.1833	13.7333
DNA-NCBI-Virus-Complete-Nucleotide-Human-2020-05-11.one_line	470877038	750	5	AGCTN_12344	3000	25.5667	23.2333	26.7333	28.6	32.1	28.7333	29.7333
DNA-Helicobacter-2019-04-24.one_line	2711601413	750	5	AGCTN_12344	2250	24	24.1778	25.4222	27.3778	34.1333	29.3333	30.7556
DNA-Genome-Strongylocentrotus-purpuratus-GCF_000002235.4-2015-03-10.one_line	659082267	750	5	AGCTN_12344	1500	28.2	27.3333	30.2667	31.2	43	35.9333	38.1333
DNA-Genome-Picea-abies-GCA_900067695.1-2016-11-09.one_line	11960690255	1000	5	AGCTN_12344	147000	22.8116	22.2905	23.1837	25.3027	21.0537	20.8061	20.9959
DNA-Helicobacter-2019-04-24.one_line	2711601413	1000	5	AGCTN_12344	3000	22.2667	21.4667	23.4	25.1	29.2333	25.4667	26.5333
DNA-NCBI-Virus-Complete-Nucleotide-Human-2020-05-11.one_line	470877038	1000	5	AGCTN_12344	3000	21.9667	14.7333	20.4	23.3	22.2333	18.7667	19.8667
DNA-Genome-Strongylocentrotus-purpuratus-GCF_000002235.4-2015-03-10.one_line	659082267	1000	5	AGCTN_12344	2000	24.9	21.4	25.7	27.15	33.1	27.95	29.6
DNA-Genome-Picea-abies-GCA_900067695.1-2016-11-09.one_line	11960690255	2500	5	AGCTN_12344	22500	23.3156	22.7156	23.8933	26.0311	24.2889	23.6178	24.0889
DNA-Helicobacter-2019-04-24.one_line	2711601413	2500	5	AGCTN_12344	2500	24.36	24.68	25.6	26.8	33.44	29.28	30.56
DNA-Genome-Picea-abies-GCA_900067695.1-2016-11-09.one_line	11960690255	5000	5	AGCTN_12344	5000	20.82	21.98	22.04	23.82	27.2	25.32	25.76
DNA-Genome-Picea-abies-GCA_900067695.1-2016-11-09.one_line	11960690255	25	5	AGNCT_12344	26625	21.615	25.0629	23.031	26.231	26.1258	25.7427	25.8103
DNA-Genome-Strongylocentrotus-purpuratus-GCF_000002235.4-2015-03-10.one_line	659082267	25	5	AGNCT_12344	8050	23.205	25.3292	25.2174	28.323	30.0373	29.0062	29.1677
DNA-Influenza-2019-04-27.one_line	1106180040	25	5	AGNCT_12344	1050	29.4286	27.2381	32.381	33.1429	47.9048	38	41.1429
DNA-Helicobacter-2019-04-24.one_line	2711601413	25	5	AGNCT_12344	700	30.7143	28.4286	34.2857	33.5714	54.7143	39.8571	44.5714
DNA-NCBI-Virus-Complete-Nucleotide-Human-2020-05-11.one_line	470877038	25	5	AGNCT_12344	125	60	41.6	78.4	64	155.2	72.8	96
DNA-Genome-Chondrus-crispus-GCA_000350225.2-2013-05-22.one_line	77592685	25	5	AGNCT_12344	125	60	38.4	80	64.8	160.8	77.6	102.4
DNA-Genome-Salpingoeca-rosetta-GCA_000188695.1-2011-02-10.one_line	37299580	25	5	AGNCT_12344	100	66	42	94	77	191	88	116
DNA-Genome-Picea-abies-GCA_900067695.1-2016-11-09.one_line	11960690255	50	5	AGNCT_12344	27950	19.8998	21.8819	21.0662	24.0107	24.0179	23.5277	23.585
DNA-Genome-Strongylocentrotus-purpuratus-GCF_000002235.4-2015-03-10.one_line	659082267	50	5	AGNCT_12344	6400	22.1094	22.8906	24.1563	27.1094	29.4531	27.9688	28.3125
DNA-Influenza-2019-04-27.one_line	1106180040	50	5	AGNCT_12344	700	31.7143	27.7143	34.5714	34.7143	53.4286	38.4286	43.4286
DNA-Helicobacter-2019-04-24.one_line	2711601413	50	5	AGNCT_12344	550	31.0909	27.0909	34.5455	34.3636	58	39.2727	45.0909
DNA-NCBI-Virus-Complete-Nucleotide-Human-2020-05-11.one_line	470877038	50	5	AGNCT_12344	200	31	21	41	33	95	34.5	52
DNA-Genome-Salpingoeca-rosetta-GCA_000188695.1-2011-02-10.one_line	37299580	50	5	AGNCT_12344	200	49	33.5	60	53.5	115	63	80
DNA-Genome-Picea-abies-GCA_900067695.1-2016-11-09.one_line	11960690255	100	5	AGNCT_12344	5500	15.6364	15.5273	16.6909	18.7091	22.3818	19.2364	19.4909
DNA-Genome-Strongylocentrotus-purpuratus-GCF_000002235.4-2015-03-10.one_line	659082267	100	5	AGNCT_12344	5200	22.3269	21.9423	24.0769	26.6923	30.0962	27.3077	28.0769
DNA-Helicobacter-2019-04-24.one_line	2711601413	100	5	AGNCT_12344	400	29.25	20.25	32	30	57.75	30	38
DNA-Genome-Chondrus-crispus-GCA_000350225.2-2013-05-22.one_line	77592685	100	5	AGNCT_12344	100	59	46	80	69	172	68	96
DNA-Genome-Salpingoeca-rosetta-GCA_000188695.1-2011-02-10.one_line	37299580	100	5	AGNCT_12344	100	66	39	90	74	184	80	108
DNA-Genome-Strongylocentrotus-purpuratus-GCF_000002235.4-2015-03-10.one_line	659082267	125	5	AGNCT_12344	6000	21.2333	21.5167	22.8333	25.4667	28.8833	26.4	27.0667
DNA-Genome-Picea-abies-GCA_900067695.1-2016-11-09.one_line	11960690255	125	5	AGNCT_12344	1625	18.7692	17.6615	20.1846	21.4154	32.7385	23.7538	25.3538
DNA-Helicobacter-2019-04-24.one_line	2711601413	125	5	AGNCT_12344	750	24.9333	20	26.1333	26.2667	41.6	27.7333	32
DNA-Influenza-2019-04-27.one_line	1106180040	125	5	AGNCT_12344	125	57.6	33.6	76.8	60.8	153.6	70.4	92.8
DNA-Genome-Strongylocentrotus-purpuratus-GCF_000002235.4-2015-03-10.one_line	659082267	150	5	AGNCT_12344	5250	20.6857	20.6667	22.2095	24.5714	28.2095	25.1619	25.5238
DNA-Helicobacter-2019-04-24.one_line	2711601413	150	5	AGNCT_12344	900	23.3333	19.2222	24.4444	24.8889	38.8889	25.5556	29.3333
DNA-Genome-Picea-abies-GCA_900067695.1-2016-11-09.one_line	11960690255	150	5	AGNCT_12344	450	27.1111	20.6667	31.5556	30.2222	62.4444	34.4444	40.8889
DNA-Genome-Chondrus-crispus-GCA_000350225.2-2013-05-22.one_line	77592685	150	5	AGNCT_12344	150	52.6667	34	66.6667	58	131.333	62.6667	85.3333
DNA-Genome-Salpingoeca-rosetta-GCA_000188695.1-2011-02-10.one_line	37299580	150	5	AGNCT_12344	150	55.3333	32.6667	69.3333	60.6667	142	72.6667	96
DNA-Genome-Strongylocentrotus-purpuratus-GCF_000002235.4-2015-03-10.one_line	659082267	250	5	AGNCT_12344	3000	20.6	19.1333	21.6667	23.4667	29.4	24.7	25.4667
DNA-Helicobacter-2019-04-24.one_line	2711601413	250	5	AGNCT_12344	500	27.8	21	30	29.2	53	28.8	35.2
DNA-Genome-Chondrus-crispus-GCA_000350225.2-2013-05-22.one_line	77592685	500	5	AGNCT_12344	500	28.4	22.4	32.4	31.4	57.8	35.6	42.4
DNA-Genome-Picea-abies-GCA_900067695.1-2016-11-09.one_line	11960690255	25	5	AGNCT_22233	361825	21.3548	25.3233	22.0996	24.8678	24.6102	24.592	24.582
DNA-Genome-Strongylocentrotus-purpuratus-GCF_000002235.4-2015-03-10.one_line	659082267	25	5	AGNCT_22233	155275	21.4632	24.6788	22.2418	25.004	25.6036	25.6062	25.5315
DNA-Helicobacter-2019-04-24.one_line	2711601413	25	5	AGNCT_22233	11000	21.7	25.0273	23.2	25.4909	28.0545	27.2	27.4545
DNA-Influenza-2019-04-27.one_line	1106180040	25	5	AGNCT_22233	7800	24.0256	26.4359	25.8974	27.8333	30.859	29.6154	29.9487
DNA-NCBI-Virus-Complete-Nucleotide-Human-2020-05-11.one_line	470877038	25	5	AGNCT_22233	5025	21.2736	20.7761	22.4478	24.1592	28.4179	24.7562	25.2338
DNA-Genome-Salpingoeca-rosetta-GCA_000188695.1-2011-02-10.one_line	37299580	25	5	AGNCT_22233	4600	23.1739	26.1957	25.2609	27.0217	32.3913	30.1957	30.8696
DNA-Genome-Chondrus-crispus-GCA_000350225.2-2013-05-22.one_line	77592685	25	5	AGNCT_22233	2000	25.35	27.45	27.9	29.15	39.3	34.15	35.8
DNA-Genome-Fusarium-graminearum-PH-1-GCF_000240135.3-2008-11-21.one_line	34133023	25	5	AGNCT_22233	825	30.6667	29.697	33.4545	34.0606	53.0909	40.3636	44.6061
DNA-Genome-Astrammina-rara-GCA_000211355.2-2011-04-27.one_line	1362918	25	5	AGNCT_22233	425	42.3529	32	47.5294	44.4706	80.7059	56.2353	64
DNA-Mitochondrion-2019-03-15.one_line	241606731	25	5	AGNCT_22233	200	50.5	39	60	51.5	115.5	63.5	80
DNA-Genome-Spironucleus-salmonicida-GCA_000497125.1-2013-11-19.one_line	9934367	25	5	AGNCT_22233	175	53.1429	38.8571	65.1429	57.1429	130.286	70.8571	89.1429
DNA-Genome-Strongylocentrotus-purpuratus-GCF_000002235.4-2015-03-10.one_line	659082267	50	5	AGNCT_22233	302750	19.968	22.5972	20.6857	23.0319	23.7566	23.6132	23.5402
DNA-Genome-Picea-abies-GCA_900067695.1-2016-11-09.one_line	11960690255	50	5	AGNCT_22233	167300	21.3724	24.3126	22.1148	24.4573	24.5678	24.5505	24.4806
DNA-Helicobacter-2019-04-24.one_line	2711601413	50	5	AGNCT_22233	26350	20.3416	22.9981	21.3966	23.7761	25.537	24.8083	24.8653
DNA-Influenza-2019-04-27.one_line	1106180040	50	5	AGNCT_22233	17850	21.1485	21.9384	22.1289	24.1513	25.3333	24.1401	24.1569
DNA-Genome-Salpingoeca-rosetta-GCA_000188695.1-2011-02-10.one_line	37299580	50	5	AGNCT_22233	10850	20.5622	23.2258	21.8618	23.8802	27.7604	26.5806	26.5806
DNA-NCBI-Virus-Complete-Nucleotide-Human-2020-05-11.one_line	470877038	50	5	AGNCT_22233	6100	19.2787	18.0984	20.1967	21.6066	24.7049	21.8852	22.2951
DNA-Genome-Chondrus-crispus-GCA_000350225.2-2013-05-22.one_line	77592685	50	5	AGNCT_22233	5850	21.3333	23.4701	22.9402	24.9402	30.547	27.9316	28.3761
DNA-Genome-Fusarium-graminearum-PH-1-GCF_000240135.3-2008-11-21.one_line	34133023	50	5	AGNCT_22233	1250	25.92	26.16	28	28.88	44.96	35.44	38.08
DNA-Mitochondrion-2019-03-15.one_line	241606731	50	5	AGNCT_22233	600	33.1667	29.5	36	36.3333	60.5	43.1667	48.6667
DNA-Genome-Spironucleus-salmonicida-GCA_000497125.1-2013-11-19.one_line	9934367	50	5	AGNCT_22233	550	32	28.3636	35.2727	33.8182	61.4545	42.5455	48.7273
DNA-Genome-Astrammina-rara-GCA_000211355.2-2011-04-27.one_line	1362918	50	5	AGNCT_22233	350	43.7143	36.8571	49.1429	46	85.7143	56	65.1429
DNA-Genome-Strongylocentrotus-purpuratus-GCF_000002235.4-2015-03-10.one_line	659082267	100	5	AGNCT_22233	792400	19.5895	22.1569	20.108	22.1506	22.5728	22.4407	22.4023
DNA-Influenza-2019-04-27.one_line	1106180040	100	5	AGNCT_22233	32600	18.589	17.5706	19.0982	20.9264	20.2025	18.9847	19.0184
DNA-Helicobacter-2019-04-24.one_line	2711601413	100	5	AGNCT_22233	30100	18.7143	19.4319	19.3821	21.2625	21.9767	21.3023	21.2359
DNA-Genome-Salpingoeca-rosetta-GCA_000188695.1-2011-02-10.one_line	37299580	100	5	AGNCT_22233	23800	19.2899	21.7017	20.2017	22.1681	24.5294	23.979	23.7983
DNA-NCBI-Virus-Complete-Nucleotide-Human-2020-05-11.one_line	470877038	100	5	AGNCT_22233	11900	15.7731	14.0504	16.1008	17.5378	19.5546	16.6891	16.8739
DNA-Genome-Chondrus-crispus-GCA_000350225.2-2013-05-22.one_line	77592685	100	5	AGNCT_22233	8600	20.4419	22.4884	21.6512	23.7209	28.8256	26.2093	26.093
DNA-Genome-Fusarium-graminearum-PH-1-GCF_000240135.3-2008-11-21.one_line	34133023	100	5	AGNCT_22233	2600	22.1538	22.5385	23.6154	25.6923	35.8077	30.1538	31.3846
DNA-Mitochondrion-2019-03-15.one_line	241606731	100	5	AGNCT_22233	600	29.5	23.8333	32.6667	31.6667	57.8333	38.6667	44.6667
DNA-Genome-Spironucleus-salmonicida-GCA_000497125.1-2013-11-19.one_line	9934367	100	5	AGNCT_22233	600	32.1667	29	35.6667	33	61.8333	43.8333	49.3333
DNA-Genome-Astrammina-rara-GCA_000211355.2-2011-04-27.one_line	1362918	100	5	AGNCT_22233	600	37	33.6667	40.3333	39.1667	65.6667	48.3333	54
DNA-Genome-Strongylocentrotus-purpuratus-GCF_000002235.4-2015-03-10.one_line	659082267	125	5	AGNCT_22233	777750	20.0447	22.5732	20.5472	22.608	22.9081	22.8395	22.7204
DNA-Influenza-2019-04-27.one_line	1106180040	125	5	AGNCT_22233	42875	17.7353	15.8624	18.0292	19.7085	17.6816	17.0099	16.877
DNA-Genome-Salpingoeca-rosetta-GCA_000188695.1-2011-02-10.one_line	37299580	125	5	AGNCT_22233	26000	19.1654	21.3731	19.9923	21.8423	23.8923	23.4308	23.2308
DNA-Helicobacter-2019-04-24.one_line	2711601413	125	5	AGNCT_22233	22625	18.8022	19.9912	19.5624	21.5867	22.7934	22.1127	21.905
DNA-Genome-Chondrus-crispus-GCA_000350225.2-2013-05-22.one_line	77592685	125	5	AGNCT_22233	13125	19.7333	21.8362	20.7695	22.7886	25.661	24.7467	24.6552
DNA-NCBI-Virus-Complete-Nucleotide-Human-2020-05-11.one_line	470877038	125	5	AGNCT_22233	11625	14.0989	12.5419	14.3484	15.8968	16.9204	15.1054	15.0022
DNA-Genome-Fusarium-graminearum-PH-1-GCF_000240135.3-2008-11-21.one_line	34133023	125	5	AGNCT_22233	2625	22.2476	22.7048	23.6952	25.0286	35.1238	29.981	30.6286
DNA-Genome-Spironucleus-salmonicida-GCA_000497125.1-2013-11-19.one_line	9934367	125	5	AGNCT_22233	375	34.9333	28	39.4667	35.2	67.6	45.0667	54.4
DNA-Mitochondrion-2019-03-15.one_line	241606731	125	5	AGNCT_22233	250	42	25.6	45.6	40.4	86	44.4	57.6
DNA-Genome-Astrammina-rara-GCA_000211355.2-2011-04-27.one_line	1362918	125	5	AGNCT_22233	125	67.2	41.6	83.2	70.4	168	84.8	108.8
DNA-Genome-Strongylocentrotus-purpuratus-GCF_000002235.4-2015-03-10.one_line	659082267	150	5	AGNCT_22233	614550	18.7331	21.0102	19.2346	21.1449	21.5325	21.6147	21.3021
DNA-Influenza-2019-04-27.one_line	1106180040	150	5	AGNCT_22233	51300	17.4854	15.4854	17.7505	19.3216	17.1072	16.3782	16.2729
DNA-Genome-Salpingoeca-rosetta-GCA_000188695.1-2011-02-10.one_line	37299580	150	5	AGNCT_22233	25650	18.963	21.0604	19.7427	21.5673	23.3138	23.4308	22.924
DNA-Helicobacter-2019-04-24.one_line	2711601413	150	5	AGNCT_22233	24750	18.2747	19.1636	18.9333	20.901	21.9717	21.3495	21.1232
DNA-NCBI-Virus-Complete-Nucleotide-Human-2020-05-11.one_line	470877038	150	5	AGNCT_22233	13500	12.4074	10.8444	12.6519	13.837	15.4667	13.2519	13.2741
DNA-Genome-Chondrus-crispus-GCA_000350225.2-2013-05-22.one_line	77592685	150	5	AGNCT_22233	13350	19.3258	21.1011	20.2397	22.0824	24.6592	24.2772	24.0599
DNA-Genome-Fusarium-graminearum-PH-1-GCF_000240135.3-2008-11-21.one_line	34133023	150	5	AGNCT_22233	4500	21.0889	22.1333	22.3556	24.0222	31.2667	27.8222	27.9111
DNA-Genome-Astrammina-rara-GCA_000211355.2-2011-04-27.one_line	1362918	150	5	AGNCT_22233	600	36.5	33.1667	39	39.5	64.6667	47.5	52.6667
DNA-Mitochondrion-2019-03-15.one_line	241606731	150	5	AGNCT_22233	150	54	37.3333	66.6667	51.3333	138.667	66	88
DNA-Genome-Spironucleus-salmonicida-GCA_000497125.1-2013-11-19.one_line	9934367	150	5	AGNCT_22233	150	54.6667	37.3333	65.3333	53.3333	51.2	66	88
DNA-Genome-Strongylocentrotus-purpuratus-GCF_000002235.4-2015-03-10.one_line	659082267	250	5	AGNCT_22233	542000	19.4138	21.4384	19.8694	21.7256	21.8203	21.8845	21.6804
DNA-Influenza-2019-04-27.one_line	1106180040	250	5	AGNCT_22233	83250	16.0456	13.0162	16.1273	17.5039	14.1009	13.6805	13.5928
DNA-Genome-Salpingoeca-rosetta-GCA_000188695.1-2011-02-10.one_line	37299580	250	5	AGNCT_22233	39750	18.6063	20.8277	19.3208	20.9711	22.2214	22.5233	22.3597
DNA-Genome-Chondrus-crispus-GCA_000350225.2-2013-05-22.one_line	77592685	250	5	AGNCT_22233	30500	19.1148	21.2689	19.823	21.6557	23.2033	23.141	23.0295
DNA-Helicobacter-2019-04-24.one_line	2711601413	250	5	AGNCT_22233	29750	18.5311	19.758	19.2067	21.1261	21.7076	21.4992	21.3647
DNA-NCBI-Virus-Complete-Nucleotide-Human-2020-05-11.one_line	470877038	250	5	AGNCT_22233	18750	12.752	10.304	12.352	13.8133	13.9573	12.0427	12.032
DNA-Genome-Fusarium-graminearum-PH-1-GCF_000240135.3-2008-11-21.one_line	34133023	250	5	AGNCT_22233	5250	19.7333	20.019	20.9524	22.1905	26.8381	25.1429	25.2952
DNA-Genome-Astrammina-rara-GCA_000211355.2-2011-04-27.one_line	1362918	250	5	AGNCT_22233	500	38.6	33	41.6	42.2	69	48	55.2
DNA-Mitochondrion-2019-03-15.one_line	241606731	250	5	AGNCT_22233	250	43.2	27.2	50.4	43.2	96	54.4	67.2
DNA-Genome-Spironucleus-salmonicida-GCA_000497125.1-2013-11-19.one_line	9934367	250	5	AGNCT_22233	250	44.4	29.2	51.2	43.2	96.4	55.6	68.8
DNA-Genome-Strongylocentrotus-purpuratus-GCF_000002235.4-2015-03-10.one_line	659082267	500	5	AGNCT_22233	379500	18.5584	20.1879	19.0519	20.6543	20.5497	20.8722	20.5955
DNA-Influenza-2019-04-27.one_line	1106180040	500	5	AGNCT_22233	164500	14.0055	10.0213	13.8723	15.0796	10.3994	10.2565	10.169
DNA-Genome-Salpingoeca-rosetta-GCA_000188695.1-2011-02-10.one_line	37299580	500	5	AGNCT_22233	112500	19.2267	21.6311	19.7796	21.3822	22.1351	22.4364	22.0871
DNA-Genome-Chondrus-crispus-GCA_000350225.2-2013-05-22.one_line	77592685	500	5	AGNCT_22233	76000	19.4	21.4868	19.9789	21.6618	22.3039	22.4118	22.2158
DNA-Helicobacter-2019-04-24.one_line	2711601413	500	5	AGNCT_22233	28500	17.0807	17.3228	17.5018	19.1789	19.0877	18.7684	18.7649
DNA-Genome-Fusarium-graminearum-PH-1-GCF_000240135.3-2008-11-21.one_line	34133023	500	5	AGNCT_22233	18000	19.9944	22.0056	20.7	22.0222	24.4222	24.0444	24.0667
DNA-NCBI-Virus-Complete-Nucleotide-Human-2020-05-11.one_line	470877038	500	5	AGNCT_22233	9500	19.0211	18.2211	19.4526	21.4	22.8842	21.4737	21.3895
DNA-Mitochondrion-2019-03-15.one_line	241606731	500	5	AGNCT_22233	2500	21.72	21.12	22.32	23.72	32.16	27.2	28.32
DNA-Genome-Spironucleus-salmonicida-GCA_000497125.1-2013-11-19.one_line	9934367	500	5	AGNCT_22233	1500	23.8667	22.1333	25.8667	25.9333	32.3333	34.1333
DNA-Genome-Strongylocentrotus-purpuratus-GCF_000002235.4-2015-03-10.one_line	659082267	750	5	AGNCT_22233	333750	18.1219	19.6267	18.5768	20.1022	19.8981	20.1567	20.0509
DNA-Influenza-2019-04-27.one_line	1106180040	750	5	AGNCT_22233	216750	13.0007	8.7183	12.9504	13.9589	8.9924	8.9167	8.7456
DNA-Genome-Salpingoeca-rosetta-GCA_000188695.1-2011-02-10.one_line	37299580	750	5	AGNCT_22233	69750	18.2366	20.3857	18.9219	20.4086	21.0495	21.2229	21.081
DNA-Genome-Chondrus-crispus-GCA_000350225.2-2013-05-22.one_line	77592685	750	5	AGNCT_22233	52500	18.5371	20.4133	19.1886	20.6743	21.6248	21.5105	21.4019
DNA-Helicobacter-2019-04-24.one_line	2711601413	750	5	AGNCT_22233	21750	16.2989	15.8483	16.4782	18.1563	18.1379	17.692	17.6
DNA-Genome-Fusarium-graminearum-PH-1-GCF_000240135.3-2008-11-21.one_line	34133023	750	5	AGNCT_22233	11250	18.8889	19.7067	19.5022	20.9778	23.4933	22.7467	22.6489
DNA-NCBI-Virus-Complete-Nucleotide-Human-2020-05-11.one_line	470877038	750	5	AGNCT_22233	10500	18.9238	19.4095	19.181	21.2667	23.2476	22.2571	22.4
DNA-Mitochondrion-2019-03-15.one_line	241606731	750	5	AGNCT_22233	750	27.3333	22	29.6	28.4	48.4	33.6	38.4
DNA-Genome-Spironucleus-salmonicida-GCA_000497125.1-2013-11-19.one_line	9934367	750	5	AGNCT_22233	750	25.6	22.2667	27.7333	26.9333	28.96	33.0667	37.3333
DNA-Genome-Strongylocentrotus-purpuratus-GCF_000002235.4-2015-03-10.one_line	659082267	1000	5	AGNCT_22233	315000	18.0181	19.5857	18.4102	19.9597	19.8368	20.0594	19.9556
DNA-Influenza-2019-04-27.one_line	1106180040	1000	5	AGNCT_22233	273000	12.6396	8.3615	12.5275	13.5271	8.5971	8.5293	8.4513
DNA-Genome-Salpingoeca-rosetta-GCA_000188695.1-2011-02-10.one_line	37299580	1000	5	AGNCT_22233	77000	18.2649	20.4442	18.9221	20.3675	21.2117	21.3156	21.1481
DNA-Genome-Chondrus-crispus-GCA_000350225.2-2013-05-22.one_line	77592685	1000	5	AGNCT_22233	45000	18.5333	20.6378	19.1333	20.64	21.8022	21.7733	21.5644
DNA-Helicobacter-2019-04-24.one_line	2711601413	1000	5	AGNCT_22233	24000	17.1667	17.05	17.6833	19.0167	18.9833	18.5375	18.45
DNA-Genome-Fusarium-graminearum-PH-1-GCF_000240135.3-2008-11-21.one_line	34133023	1000	5	AGNCT_22233	15000	19.0533	20.24	19.52	20.9867	22.9467	22.8	22.8533
DNA-NCBI-Virus-Complete-Nucleotide-Human-2020-05-11.one_line	470877038	1000	5	AGNCT_22233	9000	20.0667	21.6444	21.1333	22.7111	25.8889	24.8778	24.8444
DNA-Mitochondrion-2019-03-15.one_line	241606731	1000	5	AGNCT_22233	1000	26.7	22	29.2	28.2	44.7	33.5	36.8
DNA-Genome-Spironucleus-salmonicida-GCA_000497125.1-2013-11-19.one_line	9934367	1000	5	AGNCT_22233	1000	25.1	21.7	27.8	27.3	42.7	33.1	36.8
DNA-Influenza-2019-04-27.one_line	1106180040	2500	5	AGNCT_22233	502500	9.8903	5.9011	9.717	10.4197	5.9413	6.034	5.8762
DNA-Genome-Strongylocentrotus-purpuratus-GCF_000002235.4-2015-03-10.one_line	659082267	2500	5	AGNCT_22233	195000	17.8364	18.3779	18.0923	19.539	18.8882	19.2564	19.1179
DNA-Genome-Chondrus-crispus-GCA_000350225.2-2013-05-22.one_line	77592685	2500	5	AGNCT_22233	95000	18.4579	20.4747	18.8611	20.48	20.7421	21.0642	20.96
DNA-Genome-Salpingoeca-rosetta-GCA_000188695.1-2011-02-10.one_line	37299580	2500	5	AGNCT_22233	85000	18.1106	20.3624	18.6188	20.1165	20.6918	20.8988	20.8706
DNA-Genome-Fusarium-graminearum-PH-1-GCF_000240135.3-2008-11-21.one_line	34133023	2500	5	AGNCT_22233	30000	18.7833	20.8067	19.2933	20.6367	22.0533	22.26	22.3467
DNA-NCBI-Virus-Complete-Nucleotide-Human-2020-05-11.one_line	470877038	2500	5	AGNCT_22233	17500	19.2743	18.9943	19.8971	21.3086	21.2629	21	20.9829
DNA-Helicobacter-2019-04-24.one_line	2711601413	2500	5	AGNCT_22233	12500	17.432	16.792	17.552	19.24	19.32	18.752	18.944
DNA-Genome-Spironucleus-salmonicida-GCA_000497125.1-2013-11-19.one_line	9934367	2500	5	AGNCT_22233	2500	33
DNA-Influenza-2019-04-27.one_line	1106180040	5000	5	AGNCT_22233	450000	10.1704	5.7607	10.0782	10.7016	5.9124	5.9169	5.7484
DNA-Genome-Strongylocentrotus-purpuratus-GCF_000002235.4-2015-03-10.one_line	659082267	5000	5	AGNCT_22233	165000	17.22	17.3467	17.2279	18.7333	17.977	18.2309	18.1091
DNA-Genome-Salpingoeca-rosetta-GCA_000188695.1-2011-02-10.one_line	37299580	5000	5	AGNCT_22233	55000	17.9	18.7982	17.7891	19.6782	19.4582	19.7145	19.6436
DNA-Genome-Chondrus-crispus-GCA_000350225.2-2013-05-22.one_line	77592685	5000	5	AGNCT_22233	50000	18.344	20.282	18.728	20.182	20.882	21.234	21.128
DNA-Genome-Fusarium-graminearum-PH-1-GCF_000240135.3-2008-11-21.one_line	34133023	5000	5	AGNCT_22233	15000	18.7533	20.6	19.4267	20.62	22.88	22.88	22.8533
DNA-NCBI-Virus-Complete-Nucleotide-Human-2020-05-11.one_line	470877038	5000	5	AGNCT_22233	10000	20.34	22.22	21.26	22.81	25.69	24.89	24.92
DNA-Helicobacter-2019-04-24.one_line	2711601413	5000	5	AGNCT_22233	5000	20.02	21.62	21.28	22.56	26.96	24.76	25.44
DNA-Genome-Spironucleus-salmonicida-GCA_000497125.1-2013-11-19.one_line	9934367	5000	5	AGNCT_22233	5000	28.28
DNA-Influenza-2019-04-27.one_line	1106180040	10000	5	AGNCT_22233	320000	11.4906	6.54	11.3194	12.1672	6.7416	6.6366	6.5688
DNA-Genome-Strongylocentrotus-purpuratus-GCF_000002235.4-2015-03-10.one_line	659082267	10000	5	AGNCT_22233	110000	17.0664	17.0645	17.1909	18.45	17.5736	17.9145	17.8582
DNA-Genome-Chondrus-crispus-GCA_000350225.2-2013-05-22.one_line	77592685	10000	5	AGNCT_22233	70000	18.3286	18.8943	18.7143	20.23	20.6286	21.06	20.9543
DNA-NCBI-Virus-Complete-Nucleotide-Human-2020-05-11.one_line	470877038	10000	5	AGNCT_22233	20000	20.055	21.575	20.63	22.305	23.125	23.25	23.12
DNA-Genome-Salpingoeca-rosetta-GCA_000188695.1-2011-02-10.one_line	37299580	10000	5	AGNCT_22233	10000	19.92	21.58	20.84	22.13	25.09	24.47	24.6
DNA-Genome-Fusarium-graminearum-PH-1-GCF_000240135.3-2008-11-21.one_line	34133023	10000	5	AGNCT_22233	10000	17.75	19.49	18.44	19.49	22.59	22.18	22.28
DNA-Genome-Picea-abies-GCA_900067695.1-2016-11-09.one_line	11960690255	25	5	AGTCN_12344	82175	24.1789	25.1366	25.2875	28.0961	27.7676	27.6447	27.7213
DNA-Genome-Strongylocentrotus-purpuratus-GCF_000002235.4-2015-03-10.one_line	659082267	25	5	AGTCN_12344	26125	25.0182	25.2785	26.4957	29.1215	29.8029	29.5043	29.5656
DNA-Influenza-2019-04-27.one_line	1106180040	25	5	AGTCN_12344	8375	24	22.5075	25.3134	26.6627	28.7761	27.2239	27.7493
DNA-NCBI-Virus-Complete-Nucleotide-Human-2020-05-11.one_line	470877038	25	5	AGTCN_12344	2525	25.901	23.1683	27.6436	28.396	34.6931	30.5743	31.8416
DNA-Helicobacter-2019-04-24.one_line	2711601413	25	5	AGTCN_12344	1925	27.7922	26.4935	30.2338	31.9481	41.6104	36.2078	38.026
DNA-Mitochondrion-2019-03-15.one_line	241606731	25	5	AGTCN_12344	925	31.027	25.9459	34.8108	35.5676	53.5135	42.3784	45.8378
DNA-Genome-Astrammina-rara-GCA_000211355.2-2011-04-27.one_line	1362918	25	5	AGTCN_12344	400	39.5	29	46.5	42.5	80	54	62
DNA-Genome-Chondrus-crispus-GCA_000350225.2-2013-05-22.one_line	77592685	25	5	AGTCN_12344	175	53.7143	34.2857	67.4286	57.1429	133.714	74.2857	93.7143
DNA-Genome-Salpingoeca-rosetta-GCA_000188695.1-2011-02-10.one_line	37299580	25	5	AGTCN_12344	175	53.7143	34.8571	65.1429	54.8571	130.857	71.4286	91.4286
DNA-Genome-Fusarium-graminearum-PH-1-GCF_000240135.3-2008-11-21.one_line	34133023	25	5	AGTCN_12344	50	102	64	160	112	370	136	192
DNA-Genome-Cryptosporidium-parvum-Iowa-II-GCA_000165345.1-2007-02-26.one_line	7012512	25	5	AGTCN_12344	25	160	88	284	196	640	220	336
DNA-Genome-Picea-abies-GCA_900067695.1-2016-11-09.one_line	11960690255	50	5	AGTCN_12344	217000	23.1724	23.9765	23.9198	26.6203	24.9484	24.8562	24.9364
DNA-Genome-Strongylocentrotus-purpuratus-GCF_000002235.4-2015-03-10.one_line	659082267	50	5	AGTCN_12344	40150	24.5031	25.5318	25.7933	28.4508	28.7771	28.6326	28.5828
DNA-Influenza-2019-04-27.one_line	1106180040	50	5	AGTCN_12344	14900	22.2685	19.8658	23.0201	24.2886	24.5369	22.3221	22.6577
DNA-NCBI-Virus-Complete-Nucleotide-Human-2020-05-11.one_line	470877038	50	5	AGTCN_12344	4650	19.828	16.2151	20.172	21.3548	24.129	20.172	20.8172
DNA-Helicobacter-2019-04-24.one_line	2711601413	50	5	AGTCN_12344	3850	25.2727	24.9351	27.013	29.1169	33.6883	30.9351	31.5844
DNA-Mitochondrion-2019-03-15.one_line	241606731	50	5	AGTCN_12344	1550	29.0968	27.4839	32.129	33.0968	44.5806	37.8065	40
DNA-Genome-Astrammina-rara-GCA_000211355.2-2011-04-27.one_line	1362918	50	5	AGTCN_12344	800	33.25	27.875	37.25	37.125	57.875	44.75	49
DNA-Genome-Salpingoeca-rosetta-GCA_000188695.1-2011-02-10.one_line	37299580	50	5	AGTCN_12344	200	50	34	62	55.5	117.5	65.5	82
DNA-Genome-Chondrus-crispus-GCA_000350225.2-2013-05-22.one_line	77592685	50	5	AGTCN_12344	100	68	47	92	74	189	85	116
DNA-Genome-Fusarium-graminearum-PH-1-GCF_000240135.3-2008-11-21.one_line	34133023	50	5	AGTCN_12344	50	104	62	160	114	370	140	200
DNA-Genome-Picea-abies-GCA_900067695.1-2016-11-09.one_line	11960690255	100	5	AGTCN_12344	495800	22.0819	21.4857	22.5547	24.8899	21.9189	21.8459	21.7983
DNA-Genome-Strongylocentrotus-purpuratus-GCF_000002235.4-2015-03-10.one_line	659082267	100	5	AGTCN_12344	46600	24.088	25.4936	25.2275	27.9142	28.0536	27.8498	27.8884
DNA-Influenza-2019-04-27.one_line	1106180040	100	5	AGTCN_12344	23300	20.5236	16.9142	20.7811	22.073	19.8026	18.3562	18.5236
DNA-NCBI-Virus-Complete-Nucleotide-Human-2020-05-11.one_line	470877038	100	5	AGTCN_12344	7800	20.8205	17.1795	21.1026	22.1667	22.5641	20.141	20.5641
DNA-Helicobacter-2019-04-24.one_line	2711601413	100	5	AGTCN_12344	5900	24.0678	24	25.5932	27.8136	29.9492	28.3051	28.678
DNA-Mitochondrion-2019-03-15.one_line	241606731	100	5	AGTCN_12344	700	33.5714	29.4286	37.4286	36.8571	60	45	49.7143
DNA-Genome-Astrammina-rara-GCA_000211355.2-2011-04-27.one_line	1362918	100	5	AGTCN_12344	600	34.6667	29.3333	39.3333	37.5	64.8333	47.5	53.3333
DNA-Genome-Salpingoeca-rosetta-GCA_000188695.1-2011-02-10.one_line	37299580	100	5	AGTCN_12344	200	51.5	39	63	52	117.5	66	82
DNA-Genome-Chondrus-crispus-GCA_000350225.2-2013-05-22.one_line	77592685	100	5	AGTCN_12344	100	70	45	96	76	193	89	120
DNA-Genome-Picea-abies-GCA_900067695.1-2016-11-09.one_line	11960690255	125	5	AGTCN_12344	573000	22.0449	21.3122	22.4705	24.7468	21.6457	21.5077	21.5065
DNA-Genome-Strongylocentrotus-purpuratus-GCF_000002235.4-2015-03-10.one_line	659082267	125	5	AGTCN_12344	45125	23.8648	25.2809	24.9396	27.641	27.8116	27.6233	27.6565
DNA-Influenza-2019-04-27.one_line	1106180040	125	5	AGTCN_12344	25250	19.8535	15.3663	20.0475	21.3386	17.6079	16.5941	16.7287
DNA-NCBI-Virus-Complete-Nucleotide-Human-2020-05-11.one_line	470877038	125	5	AGTCN_12344	8625	21.0203	17.4261	21.5188	22.7478	23.0841	20.4638	20.9623
DNA-Helicobacter-2019-04-24.one_line	2711601413	125	5	AGTCN_12344	5875	23.3872	23.1489	24.6809	26.6043	28.6638	26.8596	27.3702
DNA-Mitochondrion-2019-03-15.one_line	241606731	125	5	AGTCN_12344	1000	30.9	26.9	33.8	35.2	49.3	39	42.4
DNA-Genome-Astrammina-rara-GCA_000211355.2-2011-04-27.one_line	1362918	125	5	AGTCN_12344	750	32.6667	28.1333	36.5333	36.4	58.9333	45.3333	49.6
DNA-Genome-Chondrus-crispus-GCA_000350225.2-2013-05-22.one_line	77592685	125	5	AGTCN_12344	125	59.2	40	80	64.8	157.6	74.4	99.2
DNA-Genome-Picea-abies-GCA_900067695.1-2016-11-09.one_line	11960690255	150	5	AGTCN_12344	635850	22.0568	21.3121	22.4622	24.7384	21.4654	21.3733	21.3252
DNA-Genome-Strongylocentrotus-purpuratus-GCF_000002235.4-2015-03-10.one_line	659082267	150	5	AGTCN_12344	43800	23.8721	25.2854	24.895	27.6005	27.7717	27.6096	27.5616
DNA-Influenza-2019-04-27.one_line	1106180040	150	5	AGTCN_12344	31500	17.7556	13.4444	17.7206	18.9333	15.4952	14.3333	14.4635
DNA-NCBI-Virus-Complete-Nucleotide-Human-2020-05-11.one_line	470877038	150	5	AGTCN_12344	10200	17.6471	13.9706	17.3725	18.7745	18.2647	16.2059	16.4706
DNA-Helicobacter-2019-04-24.one_line	2711601413	150	5	AGTCN_12344	7500	22.32	20.7867	23.04	25.0533	25.4	23.8533	24.32
DNA-Mitochondrion-2019-03-15.one_line	241606731	150	5	AGTCN_12344	1050	30.4762	28.381	33.7143	34.0952	50.5714	40.6667	43.8095
DNA-Genome-Astrammina-rara-GCA_000211355.2-2011-04-27.one_line	1362918	150	5	AGTCN_12344	300	42.6667	31.6667	51.3333	45	92.3333	57.6667	69.3333
DNA-Genome-Salpingoeca-rosetta-GCA_000188695.1-2011-02-10.one_line	37299580	150	5	AGTCN_12344	150	57.3333	36.6667	72	60.6667	144	74.6667	96
DNA-Genome-Picea-abies-GCA_900067695.1-2016-11-09.one_line	11960690255	250	5	AGTCN_12344	778000	22.1276	21.5174	22.5224	24.7174	21.2125	21.1469	21.0972
DNA-Genome-Strongylocentrotus-purpuratus-GCF_000002235.4-2015-03-10.one_line	659082267	250	5	AGTCN_12344	49250	23.2406	24.4365	24.1543	26.6782	26.7269	26.4914	26.534
DNA-Influenza-2019-04-27.one_line	1106180040	250	5	AGTCN_12344	47250	14.5079	10.3217	14.2603	15.327	11.8709	10.9185	10.8529
DNA-NCBI-Virus-Complete-Nucleotide-Human-2020-05-11.one_line	470877038	250	5	AGTCN_12344	12750	21.0118	16.5569	20.3451	22.6745	19.9373	18.6588	18.9804
DNA-Helicobacter-2019-04-24.one_line	2711601413	250	5	AGTCN_12344	9000	21.8222	20.9111	22.3556	24.5444	24.8889	23.5667	23.7778
DNA-Genome-Astrammina-rara-GCA_000211355.2-2011-04-27.one_line	1362918	250	5	AGTCN_12344	1250	29.44	28.48	32.16	32	47.68	39.44	41.92
DNA-Mitochondrion-2019-03-15.one_line	241606731	250	5	AGTCN_12344	750	30.9333	23.8667	32.8	32.2667	51.2	36.2667	41.0667
DNA-Genome-Picea-abies-GCA_900067695.1-2016-11-09.one_line	11960690255	500	5	AGTCN_12344	950500	22.1482	21.4207	22.4926	24.7752	20.5871	20.5685	20.4595
DNA-Influenza-2019-04-27.one_line	1106180040	500	5	AGTCN_12344	64500	10.7922	7.1752	10.4558	11.2822	8.3907	7.8403	7.7829
DNA-Genome-Strongylocentrotus-purpuratus-GCF_000002235.4-2015-03-10.one_line	659082267	500	5	AGTCN_12344	38500	22.7091	23.1688	23.3558	25.5247	25.5195	25.1091	25.1429
DNA-Helicobacter-2019-04-24.one_line	2711601413	500	5	AGTCN_12344	17000	17.8706	14.8353	17.8706	19.2588	17.3235	16.4765	16.6588
DNA-NCBI-Virus-Complete-Nucleotide-Human-2020-05-11.one_line	470877038	500	5	AGTCN_12344	9500	22.4632	17.3789	22.5263	24.4316	21.3895	20.0211	20.4632
DNA-Mitochondrion-2019-03-15.one_line	241606731	500	5	AGTCN_12344	1500	26.7333	24.3333	28.5333	29.8667	39.9333	32.1333	34.4
DNA-Genome-Astrammina-rara-GCA_000211355.2-2011-04-27.one_line	1362918	500	5	AGTCN_12344	500	36	29.6	40.4	37.8	69.8	49.2	56
DNA-Genome-Picea-abies-GCA_900067695.1-2016-11-09.one_line	11960690255	750	5	AGTCN_12344	957750	22.2801	21.5117	22.5986	24.9338	20.4186	20.366	20.3598
DNA-Influenza-2019-04-27.one_line	1106180040	750	5	AGTCN_12344	54750	9.0886	5.4374	8.6977	9.41	6.3616	5.9781	5.9324
DNA-Genome-Strongylocentrotus-purpuratus-GCF_000002235.4-2015-03-10.one_line	659082267	750	5	AGTCN_12344	27000	22.3444	22.4778	22.8222	24.8111	24.8296	24.1667	24.3407
DNA-Helicobacter-2019-04-24.one_line	2711601413	750	5	AGTCN_12344	21000	16.0429	13.1619	15.9524	17.2524	15.0286	14.5048	14.4952
DNA-NCBI-Virus-Complete-Nucleotide-Human-2020-05-11.one_line	470877038	750	5	AGTCN_12344	11250	22.7556	17.5644	22.6844	24.7911	20.6756	19.5733	19.9822
DNA-Genome-Astrammina-rara-GCA_000211355.2-2011-04-27.one_line	1362918	750	5	AGTCN_12344	750	32.4	29.6	36	35.8667	58.8	44.9333	49.6
DNA-Genome-Picea-abies-GCA_900067695.1-2016-11-09.one_line	11960690255	1000	5	AGTCN_12344	901000	22.3625	21.8396	22.6983	24.9718	20.6484	20.5699	20.5789
DNA-Influenza-2019-04-27.one_line	1106180040	1000	5	AGTCN_12344	27000	12.7111	6.9074	11.6815	13.3037	8.1667	7.6111	7.8074
DNA-Genome-Strongylocentrotus-purpuratus-GCF_000002235.4-2015-03-10.one_line	659082267	1000	5	AGTCN_12344	26000	21.9462	21.6846	22.2846	24.4231	23.7385	23.2038	23.2462
DNA-Helicobacter-2019-04-24.one_line	2711601413	1000	5	AGTCN_12344	23000	16.3826	12.9391	16.287	17.513	14.9609	14.4043	14.4696
DNA-NCBI-Virus-Complete-Nucleotide-Human-2020-05-11.one_line	470877038	1000	5	AGTCN_12344	19000	21.4263	15.8684	21.2316	23.3842	18.0895	17.3789	17.7263
DNA-Mitochondrion-2019-03-15.one_line	241606731	1000	5	AGTCN_12344	1000	30.3	29.1	33.6	34.1	51.5	41.2	44.4
DNA-Genome-Cryptosporidium-parvum-Iowa-II-GCA_000165345.1-2007-02-26.one_line	7012512	1000	5	AGTCN_12344	1000	27.5	25.8	30.2	31.3	45.2	34.9	38
DNA-Genome-Picea-abies-GCA_900067695.1-2016-11-09.one_line	11960690255	2500	5	AGTCN_12344	502500	22.4754	22.7033	22.7765	25.163	21.3413	21.2981	21.3572
DNA-NCBI-Virus-Complete-Nucleotide-Human-2020-05-11.one_line	470877038	2500	5	AGTCN_12344	40000	16.51	10.3375	16.365	17.5875	11.395	10.995	11.16
DNA-Helicobacter-2019-04-24.one_line	2711601413	2500	5	AGTCN_12344	10000	17.97	15.04	18.1	19.49	18.3	17.11	17.4
DNA-Influenza-2019-04-27.one_line	1106180040	2500	5	AGTCN_12344	5000	13.66	6.42	11.48	14.18	11.32	9.36	9.92
DNA-Genome-Strongylocentrotus-purpuratus-GCF_000002235.4-2015-03-10.one_line	659082267	2500	5	AGTCN_12344	5000	17.64	15.24	17.84	18.9	20.88	18.72	19.28
DNA-Genome-Picea-abies-GCA_900067695.1-2016-11-09.one_line	11960690255	5000	5	AGTCN_12344	170000	22.2388	23.2359	22.5165	24.9853	22.9418	22.9818	22.9976
DNA-Influenza-2019-04-27.one_line	1106180040	5000	5	AGTCN_12344	10000	9.51	4.35	8.22	9.75	7.15	6.17	6.44
DNA-NCBI-Virus-Complete-Nucleotide-Human-2020-05-11.one_line	470877038	5000	5	AGTCN_12344	10000	23.62	18.9	24.08	26.19	22.82	21.62	22.12
DNA-Genome-Picea-abies-GCA_900067695.1-2016-11-09.one_line	11960690255	10000	5	AGTCN_12344	40000	19.6725	19.26	20.125	22.04	19.3175	18.8825	19.12
DNA-Influenza-2019-04-27.one_line	1106180040	10000	5	AGTCN_12344	10000	11.68	5.45	9.8	12.19	8.42	7.36	7.72
DNA-Genome-Picea-abies-GCA_900067695.1-2016-11-09.one_line	11960690255	25	5	ANCTG_12344	18975	18.7352	22.4242	19.9947	22.7404	24.0685	23.5679	23.6733
DNA-Genome-Strongylocentrotus-purpuratus-GCF_000002235.4-2015-03-10.one_line	659082267	25	5	ANCTG_12344	6525	20.046	22.2375	21.8851	24.3218	27.8008	26.3448	26.728
DNA-Helicobacter-2019-04-24.one_line	2711601413	25	5	ANCTG_12344	1375	23.6364	24.7273	26.3273	27.9273	39.2727	31.6364	34.0364
DNA-Influenza-2019-04-27.one_line	1106180040	25	5	ANCTG_12344	275	41.4545	34.1818	49.4545	45.4545	91.6364	53.8182	65.4545
DNA-NCBI-Virus-Complete-Nucleotide-Human-2020-05-11.one_line	470877038	25	5	ANCTG_12344	250	41.6	32.8	50.4	46	94.8	53.2	67.2
DNA-Genome-Salpingoeca-rosetta-GCA_000188695.1-2011-02-10.one_line	37299580	25	5	ANCTG_12344	125	56.8	40.8	73.6	63.2	153.6	71.2	92.8
DNA-Mitochondrion-2019-03-15.one_line	241606731	25	5	ANCTG_12344	50	98	56	152	120	370	128	184
DNA-Genome-Chondrus-crispus-GCA_000350225.2-2013-05-22.one_line	77592685	25	5	ANCTG_12344	25	156	116	284	200	640	188	304
DNA-Genome-Astrammina-rara-GCA_000211355.2-2011-04-27.one_line	1362918	25	5	ANCTG_12344	25	160	96	284	212	640	216	336
DNA-Genome-Strongylocentrotus-purpuratus-GCF_000002235.4-2015-03-10.one_line	659082267	50	5	ANCTG_12344	4050	20.642	21.1605	22.5185	25.037	30.5185	27.3086	27.9506
DNA-Helicobacter-2019-04-24.one_line	2711601413	50	5	ANCTG_12344	2300	19.6522	19.2609	21.3043	22.6522	32.3913	25.7391	27.1304
DNA-Genome-Picea-abies-GCA_900067695.1-2016-11-09.one_line	11960690255	50	5	ANCTG_12344	1350	22	23.1852	24.1481	25.6296	36.5926	28.963	31.4074
DNA-NCBI-Virus-Complete-Nucleotide-Human-2020-05-11.one_line	470877038	50	5	ANCTG_12344	250	37.2	26.8	44	39.6	86	41.2	54.4
DNA-Influenza-2019-04-27.one_line	1106180040	50	5	ANCTG_12344	200	47	36.5	58	50	112	60	76
DNA-Genome-Salpingoeca-rosetta-GCA_000188695.1-2011-02-10.one_line	37299580	50	5	ANCTG_12344	150	51.3333	36	65.3333	56	132.667	63.3333	85.3333
DNA-Helicobacter-2019-04-24.one_line	2711601413	100	5	ANCTG_12344	2500	18.72	17.6	19.68	21.84	29.16	22.96	24.16
DNA-Genome-Strongylocentrotus-purpuratus-GCF_000002235.4-2015-03-10.one_line	659082267	100	5	ANCTG_12344	1500	23.5333	22.8	25.8667	26.8	38.6667	31.4667	33.6
DNA-NCBI-Virus-Complete-Nucleotide-Human-2020-05-11.one_line	470877038	100	5	ANCTG_12344	200	43	34.5	53	46	105	53	70
DNA-Influenza-2019-04-27.one_line	1106180040	100	5	ANCTG_12344	100	65	34	86	70	184	80	108
DNA-Genome-Strongylocentrotus-purpuratus-GCF_000002235.4-2015-03-10.one_line	659082267	125	5	ANCTG_12344	875	28.5714	25.3714	31.5429	32	48.9143	35.8857	39.7714
DNA-Helicobacter-2019-04-24.one_line	2711601413	125	5	ANCTG_12344	500	29.2	23.6	32.8	32.4	62.2	38.4	44.8
DNA-NCBI-Virus-Complete-Nucleotide-Human-2020-05-11.one_line	470877038	125	5	ANCTG_12344	125	56.8	36	73.6	61.6	153.6	70.4	92.8
DNA-Genome-Strongylocentrotus-purpuratus-GCF_000002235.4-2015-03-10.one_line	659082267	150	5	ANCTG_12344	600	28.3333	22.1667	30.6667	30.5	53	32.8333	38
DNA-Helicobacter-2019-04-24.one_line	2711601413	150	5	ANCTG_12344	150	46.6667	30.6667	60	50.6667	126.667	54	77.3333
DNA-Genome-Picea-abies-GCA_900067695.1-2016-11-09.one_line	11960690255	25	5	ANGCT_12344	33650	18.5498	22.6657	19.679	22.4101	23.2303	23.0163	23.049
DNA-Genome-Strongylocentrotus-purpuratus-GCF_000002235.4-2015-03-10.one_line	659082267	25	5	ANGCT_12344	11125	19.2809	21.5281	20.8539	23.4427	25.6629	24.8899	25.0247
DNA-Helicobacter-2019-04-24.one_line	2711601413	25	5	ANGCT_12344	2525	21.0693	22.2178	23.2079	25.3465	31.8416	27.8416	28.9901
DNA-Influenza-2019-04-27.one_line	1106180040	25	5	ANGCT_12344	875	27.8857	27.2	30.8571	31.0857	47.3143	35.3143	39.3143
DNA-NCBI-Virus-Complete-Nucleotide-Human-2020-05-11.one_line	470877038	25	5	ANGCT_12344	650	25.3846	20.4615	26.7692	27.5385	44.7692	27.8462	33.2308
DNA-Genome-Salpingoeca-rosetta-GCA_000188695.1-2011-02-10.one_line	37299580	25	5	ANGCT_12344	200	46	35.5	56	50	110.5	58.5	76
DNA-Genome-Chondrus-crispus-GCA_000350225.2-2013-05-22.one_line	77592685	25	5	ANGCT_12344	125	57.6	39.2	75.2	64	153.6	70.4	92.8
DNA-Mitochondrion-2019-03-15.one_line	241606731	25	5	ANGCT_12344	25	156	96	284	196	640	200	320
DNA-Genome-Fusarium-graminearum-PH-1-GCF_000240135.3-2008-11-21.one_line	34133023	25	5	ANGCT_12344	25	160	84	284	200	640	204	320
DNA-Genome-Spironucleus-salmonicida-GCA_000497125.1-2013-11-19.one_line	9934367	25	5	ANGCT_12344	25	156	84	284	204	640	204	320
DNA-Genome-Astrammina-rara-GCA_000211355.2-2011-04-27.one_line	1362918	25	5	ANGCT_12344	25	160	96	284	212	640	216	336
DNA-Genome-Strongylocentrotus-purpuratus-GCF_000002235.4-2015-03-10.one_line	659082267	50	5	ANGCT_12344	5850	19.5385	20.359	21.3675	23.7607	28.6325	25.7778	26.188
DNA-Genome-Picea-abies-GCA_900067695.1-2016-11-09.one_line	11960690255	50	5	ANGCT_12344	2400	20	21.75	21.9167	23.6667	31.2917	26.7917	28.1667
DNA-Helicobacter-2019-04-24.one_line	2711601413	50	5	ANGCT_12344	2300	19.5652	19.6957	21.3043	22.8261	31.3043	25.5652	26.9565
DNA-Influenza-2019-04-27.one_line	1106180040	50	5	ANGCT_12344	1000	26.4	25.1	29	30.7	44.6	34.3	37.6
DNA-NCBI-Virus-Complete-Nucleotide-Human-2020-05-11.one_line	470877038	50	5	ANGCT_12344	600	20.6667	13.5	21.3333	20	42	19.3333	24.6667
DNA-Genome-Salpingoeca-rosetta-GCA_000188695.1-2011-02-10.one_line	37299580	50	5	ANGCT_12344	150	52.6667	40	66.6667	58.6667	133.333	63.3333	85.3333
DNA-Genome-Chondrus-crispus-GCA_000350225.2-2013-05-22.one_line	77592685	50	5	ANGCT_12344	50	94	48	148	106	318	110	168
DNA-Genome-Fusarium-graminearum-PH-1-GCF_000240135.3-2008-11-21.one_line	34133023	50	5	ANGCT_12344	50	98	50	152	116	370	120	176
DNA-Genome-Strongylocentrotus-purpuratus-GCF_000002235.4-2015-03-10.one_line	659082267	100	5	ANGCT_12344	4500	20.5111	21.0444	22.4444	24.5111	30.2	26.8667	27.6444
DNA-Helicobacter-2019-04-24.one_line	2711601413	100	5	ANGCT_12344	2000	17.5	16.9	18.5	20	29.75	21.45	22.8
DNA-Influenza-2019-04-27.one_line	1106180040	100	5	ANGCT_12344	600	25.8333	19.8333	27.6667	27.3333	50	30.1667	35.3333
DNA-NCBI-Virus-Complete-Nucleotide-Human-2020-05-11.one_line	470877038	100	5	ANGCT_12344	100	66	39	86	72	181	78	108
DNA-Genome-Astrammina-rara-GCA_000211355.2-2011-04-27.one_line	1362918	100	5	ANGCT_12344	100	69	50	94	78	190	85	116
DNA-Helicobacter-2019-04-24.one_line	2711601413	125	5	ANGCT_12344	1625	18.8308	16.2462	19.6923	21.4154	31.6308	21.7846	23.3846
DNA-Genome-Strongylocentrotus-purpuratus-GCF_000002235.4-2015-03-10.one_line	659082267	125	5	ANGCT_12344	1625	23.0769	21.2308	24.9846	26.7077	36.8	28.8615	30.7692
DNA-Influenza-2019-04-27.one_line	1106180040	125	5	ANGCT_12344	1250	19.36	14.48	20	20.08	31.76	20.72	23.36
DNA-Genome-Salpingoeca-rosetta-GCA_000188695.1-2011-02-10.one_line	37299580	125	5	ANGCT_12344	125	57.6	33.6	75.2	63.2	152	68.8	92.8
DNA-Genome-Strongylocentrotus-purpuratus-GCF_000002235.4-2015-03-10.one_line	659082267	150	5	ANGCT_12344	1500	24.0667	23.1333	26.4	27.9333	39.9333	31.4667	33.0667
DNA-Influenza-2019-04-27.one_line	1106180040	150	5	ANGCT_12344	1200	21	15.75	21.5	22.0833	32.9167	22.8333	25.3333
DNA-Helicobacter-2019-04-24.one_line	2711601413	150	5	ANGCT_12344	900	20.8889	17.3333	21.7778	23	39.3333	24.6667	28.4444
DNA-NCBI-Virus-Complete-Nucleotide-Human-2020-05-11.one_line	470877038	150	5	ANGCT_12344	150	49.3333	32.6667	61.3333	52	128.667	59.3333	82.6667
DNA-Helicobacter-2019-04-24.one_line	2711601413	250	5	ANGCT_12344	1500	18	15.2	18.6667	19.6667	30.4667	21.2	23.2
DNA-Influenza-2019-04-27.one_line	1106180040	250	5	ANGCT_12344	500	29.6	20.4	32.4	31.2	57.6	34.4	40.8
DNA-Genome-Strongylocentrotus-purpuratus-GCF_000002235.4-2015-03-10.one_line	659082267	250	5	ANGCT_12344	250	46.8	35.6	56	51.6	102.4	60.8	73.6
DNA-Helicobacter-2019-04-24.one_line	2711601413	750	5	ANGCT_12344	750	25.0667	20.1333	26.9333	25.8667	44.4	29.4667	34.1333
DNA-Genome-Picea-abies-GCA_900067695.1-2016-11-09.one_line	11960690255	25	5	ANTCG_12344	44225	18.4986	22.8016	19.5862	22.4104	22.9079	22.7586	22.7564
DNA-Genome-Strongylocentrotus-purpuratus-GCF_000002235.4-2015-03-10.one_line	659082267	25	5	ANTCG_12344	13975	19.1199	21.5242	20.5224	23.127	25.3596	24.6154	24.8444
DNA-Helicobacter-2019-04-24.one_line	2711601413	25	5	ANTCG_12344	2925	21.3333	23.2821	23.1795	25.4359	31.1111	27.5214	28.7179
DNA-NCBI-Virus-Complete-Nucleotide-Human-2020-05-11.one_line	470877038	25	5	ANTCG_12344	1575	16.381	13.2063	16.5079	16.7619	27.0476	17.1429	19.3016
DNA-Influenza-2019-04-27.one_line	1106180040	25	5	ANTCG_12344	125	56.8	41.6	73.6	60.8	152.8	69.6	92.8
DNA-Mitochondrion-2019-03-15.one_line	241606731	25	5	ANTCG_12344	125	58.4	36.8	76.8	67.2	154.4	72	96
DNA-Genome-Astrammina-rara-GCA_000211355.2-2011-04-27.one_line	1362918	25	5	ANTCG_12344	75	80	49.3333	114.667	93.3333	237.333	98.6667	138.667
DNA-Genome-Salpingoeca-rosetta-GCA_000188695.1-2011-02-10.one_line	37299580	25	5	ANTCG_12344	50	100	60	152	122	370	124	184
DNA-Genome-Chondrus-crispus-GCA_000350225.2-2013-05-22.one_line	77592685	25	5	ANTCG_12344	25	156	92	284	200	640	200	320
DNA-Genome-Strongylocentrotus-purpuratus-GCF_000002235.4-2015-03-10.one_line	659082267	50	5	ANTCG_12344	7700	18.7013	19.9351	20.2597	22.5584	27.2727	24.6753	25.0909
DNA-Helicobacter-2019-04-24.one_line	2711601413	50	5	ANTCG_12344	5350	16.6355	17.3084	17.8692	19.7009	25.8131	21.2897	21.9813
DNA-Genome-Picea-abies-GCA_900067695.1-2016-11-09.one_line	11960690255	50	5	ANTCG_12344	4950	17.6162	19.8182	19.1111	21.2727	25.7172	23.7172	24.3232
DNA-NCBI-Virus-Complete-Nucleotide-Human-2020-05-11.one_line	470877038	50	5	ANTCG_12344	2600	14.5	12.9231	14.9231	16.2692	23.3462	15.9615	17.0769
DNA-Mitochondrion-2019-03-15.one_line	241606731	50	5	ANTCG_12344	400	33	28.5	37.5	37.25	67.25	41.25	50
DNA-Influenza-2019-04-27.one_line	1106180040	50	5	ANTCG_12344	300	37	28.3333	43.3333	39	81	44	56
DNA-Genome-Salpingoeca-rosetta-GCA_000188695.1-2011-02-10.one_line	37299580	50	5	ANTCG_12344	150	48	37.3333	61.3333	54.6667	126	56	80
DNA-Genome-Fusarium-graminearum-PH-1-GCF_000240135.3-2008-11-21.one_line	34133023	50	5	ANTCG_12344	50	100	58	152	116	330	122	184
DNA-Genome-Spironucleus-salmonicida-GCA_000497125.1-2013-11-19.one_line	9934367	50	5	ANTCG_12344	50	98	50	152	112	370	118	176
DNA-Helicobacter-2019-04-24.one_line	2711601413	100	5	ANTCG_12344	6400	15.3281	14.9531	15.9375	18.1094	21.6094	18.0625	18.5625
DNA-Genome-Strongylocentrotus-purpuratus-GCF_000002235.4-2015-03-10.one_line	659082267	100	5	ANTCG_12344	3300	20.7273	20.9394	22.6061	24.3333	31.6364	27.4545	28.3636
DNA-NCBI-Virus-Complete-Nucleotide-Human-2020-05-11.one_line	470877038	100	5	ANTCG_12344	3000	9.9	6.5333	9.2667	9.6333	15.7333	9.8	10.6667
DNA-Mitochondrion-2019-03-15.one_line	241606731	100	5	ANTCG_12344	200	45.5	37	55	50.5	109	56.5	74
DNA-Influenza-2019-04-27.one_line	1106180040	100	5	ANTCG_12344	100	63	33	86	72	179	75	104
DNA-Genome-Chondrus-crispus-GCA_000350225.2-2013-05-22.one_line	77592685	100	5	ANTCG_12344	100	65	49	86	73	177	73	104
DNA-Helicobacter-2019-04-24.one_line	2711601413	125	5	ANTCG_12344	2750	17.9273	17.2727	19.0545	21.0909	28.5091	23.4909	24.4364
DNA-NCBI-Virus-Complete-Nucleotide-Human-2020-05-11.one_line	470877038	125	5	ANTCG_12344	1125	20.4444	13.6889	20.4444	20.4444	32.4444	20.2667	23.1111
DNA-Genome-Strongylocentrotus-purpuratus-GCF_000002235.4-2015-03-10.one_line	659082267	125	5	ANTCG_12344	625	28.96	22.24	31.68	31.36	55.84	36.32	41.6
DNA-Mitochondrion-2019-03-15.one_line	241606731	125	5	ANTCG_12344	125	50.4	23.2	64	51.2	136.8	49.6	73.6
DNA-Genome-Salpingoeca-rosetta-GCA_000188695.1-2011-02-10.one_line	37299580	125	5	ANTCG_12344	125	55.2	40.8	72	59.2	152	64.8	89.6
DNA-Helicobacter-2019-04-24.one_line	2711601413	150	5	ANTCG_12344	1350	21.037	18.963	22.6667	24.1481	37.6296	27.1852	29.6296
DNA-NCBI-Virus-Complete-Nucleotide-Human-2020-05-11.one_line	470877038	150	5	ANTCG_12344	300	37.3333	26.6667	42.6667	38.6667	84.3333	46.6667	57.3333
DNA-Genome-Strongylocentrotus-purpuratus-GCF_000002235.4-2015-03-10.one_line	659082267	150	5	ANTCG_12344	150	55.3333	36.6667	68	61.3333	136	67.3333	88
DNA-Mitochondrion-2019-03-15.one_line	241606731	150	5	ANTCG_12344	150	53.3333	37.3333	68	60	132	62.6667	85.3333
DNA-Helicobacter-2019-04-24.one_line	2711601413	250	5	ANTCG_12344	2000	17.05	14.45	17.8	18.95	27.85	19.95	21.2
DNA-Mitochondrion-2019-03-15.one_line	241606731	250	5	ANTCG_12344	500	31.8	26.6	36	36.4	60.6	39.2	46.4
DNA-Genome-Strongylocentrotus-purpuratus-GCF_000002235.4-2015-03-10.one_line	659082267	250	5	ANTCG_12344	250	43.2	32.8	50.4	45.2	95.6	51.6	65.6
DNA-NCBI-Virus-Complete-Nucleotide-Human-2020-05-11.one_line	470877038	250	5	ANTCG_12344	250	39.2	27.2	46.4	42.4	92.4	48.4	62.4
DNA-Helicobacter-2019-04-24.one_line	2711601413	500	5	ANTCG_12344	2000	14.7	12.1	15.1	16.35	23.45	16.25	17.6
DNA-Helicobacter-2019-04-24.one_line	2711601413	750	5	ANTCG_12344	750	25.6	21.7333	28.8	27.6	47.3333	32.6667	37.3333
DNA-Genome-Picea-abies-GCA_900067695.1-2016-11-09.one_line	11960690255	25	5	ATCGN_12344	119825	24.0876	25.0849	25.1266	28.1344	27.3173	27.2689	27.2431
DNA-Genome-Strongylocentrotus-purpuratus-GCF_000002235.4-2015-03-10.one_line	659082267	25	5	ATCGN_12344	41475	24.8366	25.2393	26.1266	28.8945	29.0151	28.8463	28.8559
DNA-Helicobacter-2019-04-24.one_line	2711601413	25	5	ATCGN_12344	4675	25.262	25.2834	27.3797	29.6471	33.7112	31.4439	32.1711
DNA-NCBI-Virus-Complete-Nucleotide-Human-2020-05-11.one_line	470877038	25	5	ATCGN_12344	4475	21.6313	17.743	22.2123	22.8603	26.0112	22.8603	23.5084
DNA-Mitochondrion-2019-03-15.one_line	241606731	25	5	ATCGN_12344	3775	26.2517	25.1656	28.6093	30.7285	35.947	33.1921	34.1192
DNA-Influenza-2019-04-27.one_line	1106180040	25	5	ATCGN_12344	1975	28.4051	26.6329	30.9873	31.5949	41.3165	36.0506	37.6709
DNA-Genome-Astrammina-rara-GCA_000211355.2-2011-04-27.one_line	1362918	25	5	ATCGN_12344	600	35.1667	27.5	40.3333	38.8333	65.5	48.1667	54
DNA-Genome-Cryptosporidium-parvum-Iowa-II-GCA_000165345.1-2007-02-26.one_line	7012512	25	5	ATCGN_12344	75	81.3333	45.3333	117.333	92	280	108	149.333
DNA-Genome-Chondrus-crispus-GCA_000350225.2-2013-05-22.one_line	77592685	25	5	ATCGN_12344	50	100	60	160	118	370	134	192
DNA-Genome-Salpingoeca-rosetta-GCA_000188695.1-2011-02-10.one_line	37299580	25	5	ATCGN_12344	50	102	60	156	116	370	138	200
DNA-Genome-Fusarium-graminearum-PH-1-GCF_000240135.3-2008-11-21.one_line	34133023	25	5	ATCGN_12344	25	160	96	284	208	640	212	336
DNA-Genome-Picea-abies-GCA_900067695.1-2016-11-09.one_line	11960690255	50	5	ATCGN_12344	498400	23.0142	23.735	23.7584	26.4757	24.4799	24.4669	24.4342
DNA-Genome-Strongylocentrotus-purpuratus-GCF_000002235.4-2015-03-10.one_line	659082267	50	5	ATCGN_12344	97500	24.5467	25.7538	25.6595	28.3877	28.0297	28.0574	27.9549
DNA-Helicobacter-2019-04-24.one_line	2711601413	50	5	ATCGN_12344	16650	23.021	23.5556	24.3243	26.6727	27.3754	26.3844	26.5946
DNA-NCBI-Virus-Complete-Nucleotide-Human-2020-05-11.one_line	470877038	50	5	ATCGN_12344	11900	19.2437	15.5882	19.4622	20.7647	21.0504	18.4538	18.6218
DNA-Mitochondrion-2019-03-15.one_line	241606731	50	5	ATCGN_12344	10050	24.5572	24.408	26.2886	28.9055	30.6269	29.801	29.9303
DNA-Influenza-2019-04-27.one_line	1106180040	50	5	ATCGN_12344	4950	25.0303	22.2222	26.1818	27.2929	30.1818	27.0101	27.798
DNA-Genome-Astrammina-rara-GCA_000211355.2-2011-04-27.one_line	1362918	50	5	ATCGN_12344	1000	31.5	27.3	35.4	35	52.9	42.6	46
DNA-Genome-Cryptosporidium-parvum-Iowa-II-GCA_000165345.1-2007-02-26.one_line	7012512	50	5	ATCGN_12344	250	46	31.2	56	49.2	105.6	64	76.8
DNA-Genome-Fusarium-graminearum-PH-1-GCF_000240135.3-2008-11-21.one_line	34133023	50	5	ATCGN_12344	100	69	50	92	76	192	87	116
DNA-Genome-Salpingoeca-rosetta-GCA_000188695.1-2011-02-10.one_line	37299580	50	5	ATCGN_12344	50	102	70	160	120	338	130	192
DNA-Genome-Spironucleus-salmonicida-GCA_000497125.1-2013-11-19.one_line	9934367	50	5	ATCGN_12344	50	102	60	160	122	370	138	192
DNA-Genome-Picea-abies-GCA_900067695.1-2016-11-09.one_line	11960690255	100	5	ATCGN_12344	1561800	21.9699	21.4031	22.4149	25.2909	21.7502	21.6835	21.6668
DNA-Genome-Strongylocentrotus-purpuratus-GCF_000002235.4-2015-03-10.one_line	659082267	100	5	ATCGN_12344	157900	24.3281	25.9683	25.2578	27.9101	27.4623	27.4136	27.4098
DNA-Helicobacter-2019-04-24.one_line	2711601413	100	5	ATCGN_12344	49900	22.1703	22.7535	23.0341	25.5571	24.7595	24.3106	24.4168
DNA-NCBI-Virus-Complete-Nucleotide-Human-2020-05-11.one_line	470877038	100	5	ATCGN_12344	31000	14.8032	11.929	14.9161	15.9774	15.0548	13.6161	13.5484
DNA-Mitochondrion-2019-03-15.one_line	241606731	100	5	ATCGN_12344	22900	23.5677	23.4454	24.8559	27.5022	27.559	26.9301	27.0218
DNA-Influenza-2019-04-27.one_line	1106180040	100	5	ATCGN_12344	8300	22.2771	19	22.9639	24.0361	24.1566	22.0843	22.4578
DNA-Genome-Astrammina-rara-GCA_000211355.2-2011-04-27.one_line	1362918	100	5	ATCGN_12344	2300	27.6957	26.8696	30.087	31	41.0435	36.4783	37.913
DNA-Genome-Cryptosporidium-parvum-Iowa-II-GCA_000165345.1-2007-02-26.one_line	7012512	100	5	ATCGN_12344	600	34.1667	28.3333	39.3333	37	65.3333	47.6667	53.3333
DNA-Genome-Spironucleus-salmonicida-GCA_000497125.1-2013-11-19.one_line	9934367	100	5	ATCGN_12344	200	51	35.5	64	52.5	121	69.5	86
DNA-Genome-Salpingoeca-rosetta-GCA_000188695.1-2011-02-10.one_line	37299580	100	5	ATCGN_12344	100	71	47	94	77	191	87	116
DNA-Genome-Picea-abies-GCA_900067695.1-2016-11-09.one_line	11960690255	125	5	ATCGN_12344	2087875	21.9235	21.1753	22.3251	25.3247	21.3997	21.3578	21.3315
DNA-Genome-Strongylocentrotus-purpuratus-GCF_000002235.4-2015-03-10.one_line	659082267	125	5	ATCGN_12344	168625	24.2764	25.9872	25.1529	27.7207	27.2658	27.2907	27.2439
DNA-Helicobacter-2019-04-24.one_line	2711601413	125	5	ATCGN_12344	73000	22.163	22.9384	22.9836	25.4438	24.4726	24.0849	24.126
DNA-NCBI-Virus-Complete-Nucleotide-Human-2020-05-11.one_line	470877038	125	5	ATCGN_12344	38375	13.8632	10.5121	13.8371	14.8612	13.4671	11.9453	11.8723
DNA-Mitochondrion-2019-03-15.one_line	241606731	125	5	ATCGN_12344	29125	23.2446	23.0386	24.4052	27.1279	26.5579	26.1459	26.273
DNA-Influenza-2019-04-27.one_line	1106180040	125	5	ATCGN_12344	6375	21.9137	18.1176	22.3373	23.4667	24.3608	21.2863	21.7725
DNA-Genome-Astrammina-rara-GCA_000211355.2-2011-04-27.one_line	1362918	125	5	ATCGN_12344	2500	27.56	27.96	29.92	31.36	39.76	35.48	36.96
DNA-Genome-Cryptosporidium-parvum-Iowa-II-GCA_000165345.1-2007-02-26.one_line	7012512	125	5	ATCGN_12344	625	33.76	28.64	38.4	35.84	63.04	46.4	51.84
DNA-Genome-Spironucleus-salmonicida-GCA_000497125.1-2013-11-19.one_line	9934367	125	5	ATCGN_12344	250	46.8	32	55.2	51.6	104.4	60	73.6
DNA-Genome-Salpingoeca-rosetta-GCA_000188695.1-2011-02-10.one_line	37299580	125	5	ATCGN_12344	125	63.2	41.6	80	66.4	162.4	79.2	102.4
DNA-Genome-Picea-abies-GCA_900067695.1-2016-11-09.one_line	11960690255	150	5	ATCGN_12344	2605950	21.8686	21.0716	22.2423	25.2638	21.1967	21.1688	21.1049
DNA-Genome-Strongylocentrotus-purpuratus-GCF_000002235.4-2015-03-10.one_line	659082267	150	5	ATCGN_12344	187650	24.2728	26	25.0946	27.6946	27.1394	27.141	27.1122
DNA-Helicobacter-2019-04-24.one_line	2711601413	150	5	ATCGN_12344	95250	21.9318	22.4672	22.484	24.9627	23.7816	23.4121	23.4121
DNA-NCBI-Virus-Complete-Nucleotide-Human-2020-05-11.one_line	470877038	150	5	ATCGN_12344	44700	13.8837	10.5213	13.6286	14.83	13.2595	11.9821	11.83
DNA-Mitochondrion-2019-03-15.one_line	241606731	150	5	ATCGN_12344	34650	23.1833	22.7417	24.254	26.8716	26.1905	25.6912	25.7431
DNA-Influenza-2019-04-27.one_line	1106180040	150	5	ATCGN_12344	5550	22.1802	18.1802	22.7027	23.8198	23.9279	21.6036	22.1982
DNA-Genome-Astrammina-rara-GCA_000211355.2-2011-04-27.one_line	1362918	150	5	ATCGN_12344	2250	27.8222	26.4889	30.1333	31.2444	40.4	36.1333	37.1556
DNA-Genome-Cryptosporidium-parvum-Iowa-II-GCA_000165345.1-2007-02-26.one_line	7012512	150	5	ATCGN_12344	750	32.1333	27.7333	36.2667	36	57.2	43.4667	48
DNA-Genome-Salpingoeca-rosetta-GCA_000188695.1-2011-02-10.one_line	37299580	150	5	ATCGN_12344	150	58	37.3333	72	61.3333	142.667	73.3333	96
DNA-Genome-Spironucleus-salmonicida-GCA_000497125.1-2013-11-19.one_line	9934367	150	5	ATCGN_12344	150	58	38	73.3333	59.3333	93.3333	76	98.6667
DNA-Genome-Picea-abies-GCA_900067695.1-2016-11-09.one_line	11960690255	250	5	ATCGN_12344	4335750	22.0125	21.171	22.3654	25.5661	20.9898	21.0177	20.9173
DNA-Genome-Strongylocentrotus-purpuratus-GCF_000002235.4-2015-03-10.one_line	659082267	250	5	ATCGN_12344	225500	24.0958	26.063	24.8266	27.3273	26.7685	26.949	26.7424
DNA-Helicobacter-2019-04-24.one_line	2711601413	250	5	ATCGN_12344	174250	21.4824	21.2717	21.7607	24.0425	22.0999	21.8766	21.771
DNA-Mitochondrion-2019-03-15.one_line	241606731	250	5	ATCGN_12344	59000	22.7949	22.6983	23.4441	26.4169	24.9729	24.7407	24.7932
DNA-NCBI-Virus-Complete-Nucleotide-Human-2020-05-11.one_line	470877038	250	5	ATCGN_12344	51500	15.7476	10.6777	14.7883	16.6078	12.7592	11.7922	11.8136
DNA-Influenza-2019-04-27.one_line	1106180040	250	5	ATCGN_12344	6250	20.8	16.096	20.48	22.256	21.536	19.168	19.648
DNA-Genome-Astrammina-rara-GCA_000211355.2-2011-04-27.one_line	1362918	250	5	ATCGN_12344	3000	26.9667	27.2333	29	30.3667	38.0333	34.8667	35.7333
DNA-Genome-Spironucleus-salmonicida-GCA_000497125.1-2013-11-19.one_line	9934367	250	5	ATCGN_12344	750	58.1333
DNA-Genome-Cryptosporidium-parvum-Iowa-II-GCA_000165345.1-2007-02-26.one_line	7012512	250	5	ATCGN_12344	250	44.4	33.2	53.6	46.8	100.8	59.6	72
DNA-Genome-Picea-abies-GCA_900067695.1-2016-11-09.one_line	11960690255	500	5	ATCGN_12344	7290500	22.3776	21.7856	22.7267	25.9939	21.2821	21.2937	21.2382
DNA-Helicobacter-2019-04-24.one_line	2711601413	500	5	ATCGN_12344	288500	22.1383	22.2229	22.4908	24.7709	22.5127	22.4156	22.2988
DNA-Genome-Strongylocentrotus-purpuratus-GCF_000002235.4-2015-03-10.one_line	659082267	500	5	ATCGN_12344	282500	23.9161	25.7784	24.5345	27.0018	26.1285	26.3508	26.0418
DNA-Mitochondrion-2019-03-15.one_line	241606731	500	5	ATCGN_12344	98500	22.1949	21.5787	22.6071	25.3909	23.0883	22.9513	22.9442
DNA-NCBI-Virus-Complete-Nucleotide-Human-2020-05-11.one_line	470877038	500	5	ATCGN_12344	87000	15.7126	9.969	15.0023	16.5517	11.5598	10.8644	10.8414
DNA-Influenza-2019-04-27.one_line	1106180040	500	5	ATCGN_12344	5500	20.0545	15.1091	20.3636	21.4364	20.8182	17.8545	18.6182
DNA-Genome-Astrammina-rara-GCA_000211355.2-2011-04-27.one_line	1362918	500	5	ATCGN_12344	3500	26.2	27.4571	27.8286	29.4	35.7714	33.1714	33.7143
DNA-Genome-Cryptosporidium-parvum-Iowa-II-GCA_000165345.1-2007-02-26.one_line	7012512	500	5	ATCGN_12344	2500	26.08	26.28	28.24	29.8	38.32	34.08	35.52
DNA-Genome-Spironucleus-salmonicida-GCA_000497125.1-2013-11-19.one_line	9934367	500	5	ATCGN_12344	1000	30.4	27.9	33	33.6	40.5	40.5	44
DNA-Genome-Picea-abies-GCA_900067695.1-2016-11-09.one_line	11960690255	750	5	ATCGN_12344	9488250	22.5712	22.1496	22.9101	26.1949	21.4728	21.5133	21.4532
DNA-Helicobacter-2019-04-24.one_line	2711601413	750	5	ATCGN_12344	363000	22.1738	22.1256	22.314	24.6975	22.122	22.13	22.0209
DNA-Genome-Strongylocentrotus-purpuratus-GCF_000002235.4-2015-03-10.one_line	659082267	750	5	ATCGN_12344	264750	23.8429	25.6453	24.3619	26.8249	26.031	25.8723	26.0714
DNA-Mitochondrion-2019-03-15.one_line	241606731	750	5	ATCGN_12344	144000	21.6826	20.4111	22.0181	24.5958	21.4486	21.291	21.3556
DNA-NCBI-Virus-Complete-Nucleotide-Human-2020-05-11.one_line	470877038	750	5	ATCGN_12344	138750	13.2872	7.5726	12.4886	13.884	8.9168	8.2155	8.222
DNA-Influenza-2019-04-27.one_line	1106180040	750	5	ATCGN_12344	7500	20.48	15.88	20.3733	21.92	20.2	18	18.56
DNA-Genome-Cryptosporidium-parvum-Iowa-II-GCA_000165345.1-2007-02-26.one_line	7012512	750	5	ATCGN_12344	2250	26.3111	26.2667	28.5333	30.2667	39.0667	35.0222	35.9111
DNA-Genome-Spironucleus-salmonicida-GCA_000497125.1-2013-11-19.one_line	9934367	750	5	ATCGN_12344	1500	28.1333	27.6	30.5333	31.7333	44.0667	37.2667	39.4667
DNA-Genome-Fusarium-graminearum-PH-1-GCF_000240135.3-2008-11-21.one_line	34133023	750	5	ATCGN_12344	750	28	26.2667	30.6667	30.8	49.6	34.8	39.4667
DNA-Genome-Astrammina-rara-GCA_000211355.2-2011-04-27.one_line	1362918	750	5	ATCGN_12344	750	32.1333	28.2667	35.7333	35.3333	58	44.2667	48.5333
DNA-Genome-Picea-abies-GCA_900067695.1-2016-11-09.one_line	11960690255	1000	5	ATCGN_12344	11340000	22.6948	22.3575	23.0247	26.2881	21.5885	21.6438	21.6076
DNA-Helicobacter-2019-04-24.one_line	2711601413	1000	5	ATCGN_12344	404000	22.3864	22.5245	22.6866	25.0052	22.3993	22.3943	22.3366
DNA-Genome-Strongylocentrotus-purpuratus-GCF_000002235.4-2015-03-10.one_line	659082267	1000	5	ATCGN_12344	290000	23.8628	25.6155	24.3159	26.8024	25.7014	25.9107	25.7172
DNA-NCBI-Virus-Complete-Nucleotide-Human-2020-05-11.one_line	470877038	1000	5	ATCGN_12344	185000	12.6097	6.9454	11.8238	13.1432	7.9351	7.4303	7.3622
DNA-Mitochondrion-2019-03-15.one_line	241606731	1000	5	ATCGN_12344	185000	21.7422	20.4692	22.0984	24.7622	21.3276	21.1654	21.2303
DNA-Influenza-2019-04-27.one_line	1106180040	1000	5	ATCGN_12344	4000	21.975	16.125	22.05	23.425	23.7	20.2	21.4
DNA-Genome-Fusarium-graminearum-PH-1-GCF_000240135.3-2008-11-21.one_line	34133023	1000	5	ATCGN_12344	2000	22.65	23.85	24.7	26.65	34.45	29.4	31
DNA-Genome-Spironucleus-salmonicida-GCA_000497125.1-2013-11-19.one_line	9934367	1000	5	ATCGN_12344	2000	26.8	26.95	28.8	30.35	36.7333	35.1	36.6
DNA-Genome-Cryptosporidium-parvum-Iowa-II-GCA_000165345.1-2007-02-26.one_line	7012512	1000	5	ATCGN_12344	2000	26.45	26.2	28.8	30.05	40.4	34.75	36.8
DNA-Genome-Picea-abies-GCA_900067695.1-2016-11-09.one_line	11960690255	2500	5	ATCGN_12344	18612500	23.0831	22.8431	23.3279	26.5034	21.807	22.0665	22.068
DNA-Helicobacter-2019-04-24.one_line	2711601413	2500	5	ATCGN_12344	555000	22.1268	21.8995	22.2631	24.4881	21.5517	21.611	21.4645
DNA-Mitochondrion-2019-03-15.one_line	241606731	2500	5	ATCGN_12344	397500	21.3114	19.0898	21.5326	23.9291	19.2533	19.0843	19.2111
DNA-NCBI-Virus-Complete-Nucleotide-Human-2020-05-11.one_line	470877038	2500	5	ATCGN_12344	352500	10.6338	5.1872	9.8014	11.0913	5.6848	5.4826	5.4536
DNA-Genome-Strongylocentrotus-purpuratus-GCF_000002235.4-2015-03-10.one_line	659082267	2500	5	ATCGN_12344	162500	23.5452	24.4548	23.7662	26.0775	25.0006	25.0117	24.9009
DNA-Genome-Cryptosporidium-parvum-Iowa-II-GCA_000165345.1-2007-02-26.one_line	7012512	2500	5	ATCGN_12344	10000	24.1	26.05	25.14	27.71	29.94	29	29.16
DNA-Genome-Spironucleus-salmonicida-GCA_000497125.1-2013-11-19.one_line	9934367	2500	5	ATCGN_12344	2500	38.76
DNA-Genome-Picea-abies-GCA_900067695.1-2016-11-09.one_line	11960690255	5000	5	ATCGN_12344	23815000	23.2515	23.1404	23.4339	26.5389	21.9286	22.3141	22.3323
DNA-Helicobacter-2019-04-24.one_line	2711601413	5000	5	ATCGN_12344	790000	22.3159	21.912	22.3762	24.6719	21.3729	21.4092	21.3656
DNA-Mitochondrion-2019-03-15.one_line	241606731	5000	5	ATCGN_12344	720000	21.0904	18.7965	21.2914	23.6786	18.7272	18.6086	18.6678
DNA-NCBI-Virus-Complete-Nucleotide-Human-2020-05-11.one_line	470877038	5000	5	ATCGN_12344	535000	8.6458	3.9178	8.0953	8.9759	4.5252	4.2316	4.1974
DNA-Genome-Strongylocentrotus-purpuratus-GCF_000002235.4-2015-03-10.one_line	659082267	5000	5	ATCGN_12344	80000	22.6238	21.4825	22.605	24.6875	22.0425	21.9625	21.92
DNA-Genome-Cryptosporidium-parvum-Iowa-II-GCA_000165345.1-2007-02-26.one_line	7012512	5000	5	ATCGN_12344	15000	24.04	26.1467	25.0533	27.3267	28.6333	28.1467	28.1333
DNA-Genome-Picea-abies-GCA_900067695.1-2016-11-09.one_line	11960690255	10000	5	ATCGN_12344	24010000	23.3516	23.3679	23.5742	26.5323	22.1111	22.4707	22.4936
DNA-Mitochondrion-2019-03-15.one_line	241606731	10000	5	ATCGN_12344	1310000	20.8508	18.2894	21.0699	23.8179	17.8628	17.8319	17.8644
DNA-Helicobacter-2019-04-24.one_line	2711601413	10000	5	ATCGN_12344	1120000	23.0858	23.938	23.4111	26.0974	23.2221	23.3112	23.2293
DNA-NCBI-Virus-Complete-Nucleotide-Human-2020-05-11.one_line	470877038	10000	5	ATCGN_12344	740000	5.8192	2.4291	5.3376	6.0127	2.8182	2.6341	2.5984
DNA-Genome-Strongylocentrotus-purpuratus-GCF_000002235.4-2015-03-10.one_line	659082267	10000	5	ATCGN_12344	40000	20.5325	17.345	20.21	22.1325	18.5725	18.195	18.34
DNA-Genome-Cryptosporidium-parvum-Iowa-II-GCA_000165345.1-2007-02-26.one_line	7012512	10000	5	ATCGN_12344	40000	23.695	26.19	24.39	26.845	27.12	27.15	26.97
DNA-Genome-Picea-abies-GCA_900067695.1-2016-11-09.one_line	11960690255	25	5	ATGCN_12344	174350	24.1285	25.0995	25.0852	27.9696	27.1247	27.1047	27.0926
DNA-Genome-Strongylocentrotus-purpuratus-GCF_000002235.4-2015-03-10.one_line	659082267	25	5	ATGCN_12344	63725	24.8505	25.3291	26.0432	28.918	28.6952	28.5932	28.692
DNA-NCBI-Virus-Complete-Nucleotide-Human-2020-05-11.one_line	470877038	25	5	ATGCN_12344	6675	21.7079	18.8165	22.4419	23.7453	25.4232	22.9513	23.4906
DNA-Helicobacter-2019-04-24.one_line	2711601413	25	5	ATGCN_12344	6425	24.7004	24.5292	26.5837	28.8872	31.5175	30.1012	30.4436
DNA-Influenza-2019-04-27.one_line	1106180040	25	5	ATGCN_12344	5400	25.4074	23.8889	27	28.2593	31.4815	29.4259	30.0741
DNA-Mitochondrion-2019-03-15.one_line	241606731	25	5	ATGCN_12344	4000	25.75	24.35	28.45	30.7	35.75	33.075	34
DNA-Genome-Astrammina-rara-GCA_000211355.2-2011-04-27.one_line	1362918	25	5	ATGCN_12344	800	33	27.25	37.75	36.75	58.25	45.25	49.5
DNA-Genome-Cryptosporidium-parvum-Iowa-II-GCA_000165345.1-2007-02-26.one_line	7012512	25	5	ATGCN_12344	175	53.1429	33.7143	67.4286	56.5714	129.143	70.2857	89.1429
DNA-Genome-Salpingoeca-rosetta-GCA_000188695.1-2011-02-10.one_line	37299580	25	5	ATGCN_12344	100	70	44	94	73	191	88	116
DNA-Genome-Fusarium-graminearum-PH-1-GCF_000240135.3-2008-11-21.one_line	34133023	25	5	ATGCN_12344	25	160	104	284	208	640	200	320
DNA-Genome-Spironucleus-salmonicida-GCA_000497125.1-2013-11-19.one_line	9934367	25	5	ATGCN_12344	25	160	96	284	196	640	224	336
DNA-Genome-Picea-abies-GCA_900067695.1-2016-11-09.one_line	11960690255	50	5	ATGCN_12344	578200	23.1422	23.8616	23.8661	26.5294	24.5835	24.5543	24.5403
DNA-Genome-Strongylocentrotus-purpuratus-GCF_000002235.4-2015-03-10.one_line	659082267	50	5	ATGCN_12344	126200	24.6141	25.7884	25.6751	28.3677	27.9255	27.916	27.8954
DNA-NCBI-Virus-Complete-Nucleotide-Human-2020-05-11.one_line	470877038	50	5	ATGCN_12344	18800	17.8777	14.4574	18.1277	19.5585	18.8457	16.8936	16.8723
DNA-Helicobacter-2019-04-24.one_line	2711601413	50	5	ATGCN_12344	17400	23.0287	23.7644	24.2989	26.8276	27.3621	26.4828	26.6667
DNA-Influenza-2019-04-27.one_line	1106180040	50	5	ATGCN_12344	12000	22.7917	20.8333	23.5833	24.8083	25.7583	23.7833	24.1667
DNA-Mitochondrion-2019-03-15.one_line	241606731	50	5	ATGCN_12344	8650	24.4393	24.1503	26.1965	28.7746	31.052	29.9653	30.2428
DNA-Genome-Astrammina-rara-GCA_000211355.2-2011-04-27.one_line	1362918	50	5	ATGCN_12344	1600	28.9375	26.4375	31.875	33	45.25	38.8125	40.75
DNA-Genome-Cryptosporidium-parvum-Iowa-II-GCA_000165345.1-2007-02-26.one_line	7012512	50	5	ATGCN_12344	350	41.7143	30.5714	48	43.7143	87.1429	57.7143	67.4286
DNA-Genome-Salpingoeca-rosetta-GCA_000188695.1-2011-02-10.one_line	37299580	50	5	ATGCN_12344	100	68	41	92	75	190	86	116
DNA-Genome-Fusarium-graminearum-PH-1-GCF_000240135.3-2008-11-21.one_line	34133023	50	5	ATGCN_12344	100	70	51	92	76	189	85	116
DNA-Genome-Spironucleus-salmonicida-GCA_000497125.1-2013-11-19.one_line	9934367	50	5	ATGCN_12344	50	104	62	160	120	370	136	192
DNA-Genome-Picea-abies-GCA_900067695.1-2016-11-09.one_line	11960690255	100	5	ATGCN_12344	1630800	22.1219	21.5552	22.5488	25.3489	21.8366	21.7663	21.7694
DNA-Genome-Strongylocentrotus-purpuratus-GCF_000002235.4-2015-03-10.one_line	659082267	100	5	ATGCN_12344	188500	24.3915	25.9984	25.2976	27.9395	27.417	27.2992	27.3782
DNA-Helicobacter-2019-04-24.one_line	2711601413	100	5	ATGCN_12344	48600	22.4074	23.251	23.3045	25.8663	25.3333	24.7942	24.8395
DNA-NCBI-Virus-Complete-Nucleotide-Human-2020-05-11.one_line	470877038	100	5	ATGCN_12344	44900	14.8374	11.0802	14.8285	16.0445	13.9733	12.6927	12.6147
DNA-Influenza-2019-04-27.one_line	1106180040	100	5	ATGCN_12344	18500	18.5027	15.7189	18.8	19.7459	19.7622	17.5622	17.7297
DNA-Mitochondrion-2019-03-15.one_line	241606731	100	5	ATGCN_12344	15900	24.1572	24.1006	25.434	28.1132	28.6352	28.1321	28.0755
DNA-Genome-Astrammina-rara-GCA_000211355.2-2011-04-27.one_line	1362918	100	5	ATGCN_12344	3400	26.8235	26.7059	29	30.1471	37.5294	34.4118	35.4118
DNA-Genome-Cryptosporidium-parvum-Iowa-II-GCA_000165345.1-2007-02-26.one_line	7012512	100	5	ATGCN_12344	600	34	28.5	38.3333	38	63.6667	46.3333	52
DNA-Genome-Spironucleus-salmonicida-GCA_000497125.1-2013-11-19.one_line	9934367	100	5	ATGCN_12344	100	70	39	94	74	193	89	120
DNA-Genome-Picea-abies-GCA_900067695.1-2016-11-09.one_line	11960690255	125	5	ATGCN_12344	2162250	21.9376	21.1712	22.3101	25.3029	21.335	21.3062	21.2466
DNA-Genome-Strongylocentrotus-purpuratus-GCF_000002235.4-2015-03-10.one_line	659082267	125	5	ATGCN_12344	209500	24.3351	26.0539	25.1866	27.7933	27.2291	27.295	27.158
DNA-Helicobacter-2019-04-24.one_line	2711601413	125	5	ATGCN_12344	71250	22.3747	23.2688	23.2309	25.7418	24.9291	24.4786	24.6063
DNA-NCBI-Virus-Complete-Nucleotide-Human-2020-05-11.one_line	470877038	125	5	ATGCN_12344	57875	15.0549	11.606	15.0082	16.1641	13.9957	13.1041	12.9659
DNA-Influenza-2019-04-27.one_line	1106180040	125	5	ATGCN_12344	20250	16.8889	14.0148	17.1852	18.0691	17.9704	15.9457	15.9605
DNA-Mitochondrion-2019-03-15.one_line	241606731	125	5	ATGCN_12344	17125	24.1401	24.3679	25.4248	28.1226	28.5723	27.7139	27.9591
DNA-Genome-Astrammina-rara-GCA_000211355.2-2011-04-27.one_line	1362918	125	5	ATGCN_12344	3125	26.88	26.464	29.184	30.592	37.6	34.656	35.328
DNA-Genome-Cryptosporidium-parvum-Iowa-II-GCA_000165345.1-2007-02-26.one_line	7012512	125	5	ATGCN_12344	500	35.6	28.4	40.8	40.4	70.2	49.6	56
DNA-Genome-Picea-abies-GCA_900067695.1-2016-11-09.one_line	11960690255	150	5	ATGCN_12344	2670900	21.8884	21.0898	22.2389	25.1894	21.1264	21.1011	21.0316
DNA-Genome-Strongylocentrotus-purpuratus-GCF_000002235.4-2015-03-10.one_line	659082267	150	5	ATGCN_12344	220950	24.2974	26.0706	25.1116	27.7198	27.0889	27.1595	27.0812
DNA-Helicobacter-2019-04-24.one_line	2711601413	150	5	ATGCN_12344	92850	22.1982	23.1309	22.9596	25.4852	24.4523	24.2229	24.1852
DNA-NCBI-Virus-Complete-Nucleotide-Human-2020-05-11.one_line	470877038	150	5	ATGCN_12344	63750	15.1169	11.4604	14.88	16.1867	13.589	12.7122	12.6431
DNA-Influenza-2019-04-27.one_line	1106180040	150	5	ATGCN_12344	23100	16.1688	12.5714	16.1299	17.1472	15.9784	14.1299	14.2338
DNA-Mitochondrion-2019-03-15.one_line	241606731	150	5	ATGCN_12344	16350	23.9572	23.7187	25.1865	27.7125	27.6208	26.8196	27.0336
DNA-Genome-Astrammina-rara-GCA_000211355.2-2011-04-27.one_line	1362918	150	5	ATGCN_12344	4800	26.0417	26.5	27.9583	29.5625	34.25	32.5625	32.75
DNA-Genome-Cryptosporidium-parvum-Iowa-II-GCA_000165345.1-2007-02-26.one_line	7012512	150	5	ATGCN_12344	750	32.2667	27.7333	36.2667	36.5333	58	44.2667	48.5333
DNA-Genome-Spironucleus-salmonicida-GCA_000497125.1-2013-11-19.one_line	9934367	150	5	ATGCN_12344	300	92.6667
DNA-Genome-Picea-abies-GCA_900067695.1-2016-11-09.one_line	11960690255	250	5	ATGCN_12344	4623250	21.8506	20.923	22.1644	25.441	20.6119	20.6464	20.5379
DNA-Genome-Strongylocentrotus-purpuratus-GCF_000002235.4-2015-03-10.one_line	659082267	250	5	ATGCN_12344	249750	24.1461	26.034	24.8665	27.407	26.7716	26.8725	26.7403
DNA-Helicobacter-2019-04-24.one_line	2711601413	250	5	ATGCN_12344	180750	22.0575	22.7342	22.5848	24.9732	23.4816	23.21	23.2299
DNA-NCBI-Virus-Complete-Nucleotide-Human-2020-05-11.one_line	470877038	250	5	ATGCN_12344	105750	13.8553	9.6605	13.182	14.5513	11.0213	10.4076	10.3149
DNA-Influenza-2019-04-27.one_line	1106180040	250	5	ATGCN_12344	26500	13.3849	10.6792	13.4264	14.2189	13.3321	11.883	11.7887
DNA-Mitochondrion-2019-03-15.one_line	241606731	250	5	ATGCN_12344	22500	23.6711	24.1067	24.7556	27.4578	27.2444	26.9422	26.9689
DNA-Genome-Astrammina-rara-GCA_000211355.2-2011-04-27.one_line	1362918	250	5	ATGCN_12344	6250	25.568	26.512	27.104	28.864	33.296	32.192	32.192
DNA-Genome-Cryptosporidium-parvum-Iowa-II-GCA_000165345.1-2007-02-26.one_line	7012512	250	5	ATGCN_12344	1750	27.5429	26.6857	29.8286	31.3143	41.3714	35.6	37.2571
DNA-Genome-Spironucleus-salmonicida-GCA_000497125.1-2013-11-19.one_line	9934367	250	5	ATGCN_12344	1000	29.9	28.2	32.8	34.1	40.3	43.6
DNA-Genome-Picea-abies-GCA_900067695.1-2016-11-09.one_line	11960690255	500	5	ATGCN_12344	8849000	21.9263	20.8439	22.2056	25.8188	20.1771	20.2485	20.1301
DNA-Helicobacter-2019-04-24.one_line	2711601413	500	5	ATGCN_12344	383000	22.3211	22.6159	22.6679	25.0355	22.5405	22.5272	22.4439
DNA-Genome-Strongylocentrotus-purpuratus-GCF_000002235.4-2015-03-10.one_line	659082267	500	5	ATGCN_12344	265000	23.934	25.8204	24.6098	27.0158	26.1668	26.3551	26.1464
DNA-NCBI-Virus-Complete-Nucleotide-Human-2020-05-11.one_line	470877038	500	5	ATGCN_12344	179500	13.7872	8.4602	12.663	14.3253	9.1443	8.8301	8.8312
DNA-Mitochondrion-2019-03-15.one_line	241606731	500	5	ATGCN_12344	31500	23.3746	23.9397	24.1206	26.9016	26.5397	26.2444	26.2349
DNA-Influenza-2019-04-27.one_line	1106180040	500	5	ATGCN_12344	16000	18.6625	14.3063	18.475	19.9688	16.825	15.7313	16.05
DNA-Genome-Astrammina-rara-GCA_000211355.2-2011-04-27.one_line	1362918	500	5	ATGCN_12344	7000	25.2286	26.8	26.5429	28.4857	31.8143	30.8143	30.8
DNA-Genome-Cryptosporidium-parvum-Iowa-II-GCA_000165345.1-2007-02-26.one_line	7012512	500	5	ATGCN_12344	3000	25.8667	26.0333	27.6667	29.7667	35.8667	33	33.4667
DNA-Genome-Spironucleus-salmonicida-GCA_000497125.1-2013-11-19.one_line	9934367	500	5	ATGCN_12344	1000	30.2	28.5	33	33.8	70	41.4	44.8
DNA-Genome-Picea-abies-GCA_900067695.1-2016-11-09.one_line	11960690255	750	5	ATGCN_12344	12362250	21.9296	20.7713	22.1848	25.9578	19.9514	20.0991	19.9834
DNA-Helicobacter-2019-04-24.one_line	2711601413	750	5	ATGCN_12344	498750	22.5412	23.1116	22.9377	25.3345	22.8702	22.8519	22.7745
DNA-Genome-Strongylocentrotus-purpuratus-GCF_000002235.4-2015-03-10.one_line	659082267	750	5	ATGCN_12344	249000	23.8735	25.6438	24.3831	26.8237	25.9406	26.096	25.9775
DNA-NCBI-Virus-Complete-Nucleotide-Human-2020-05-11.one_line	470877038	750	5	ATGCN_12344	216750	13.3343	7.7153	12.0932	13.8501	8.4466	8.1269	8.1052
DNA-Mitochondrion-2019-03-15.one_line	241606731	750	5	ATGCN_12344	36000	23.0722	22.8889	23.6833	26.3778	25.2611	24.9472	25.0111
DNA-Influenza-2019-04-27.one_line	1106180040	750	5	ATGCN_12344	10500	23.3429	19.8381	23.0476	25.4667	23.3429	22.3619	22.3619
DNA-Genome-Cryptosporidium-parvum-Iowa-II-GCA_000165345.1-2007-02-26.one_line	7012512	750	5	ATGCN_12344	7500	24.4533	25.8267	25.76	28.1733	30.6933	29.72	29.76
DNA-Genome-Astrammina-rara-GCA_000211355.2-2011-04-27.one_line	1362918	750	5	ATGCN_12344	7500	25.0933	26.8267	26.3733	28.3733	31.5467	31	30.6133
DNA-Genome-Spironucleus-salmonicida-GCA_000497125.1-2013-11-19.one_line	9934367	750	5	ATGCN_12344	750	32.4	28.8	35.4667	35.8667	56.4	43.3333	48
DNA-Genome-Picea-abies-GCA_900067695.1-2016-11-09.one_line	11960690255	1000	5	ATGCN_12344	15331000	21.9482	20.7417	22.1937	26.0498	19.8367	20.0646	19.9704
DNA-Helicobacter-2019-04-24.one_line	2711601413	1000	5	ATGCN_12344	616000	22.4205	22.9247	22.6539	25.1206	22.5786	22.5558	22.5169
DNA-NCBI-Virus-Complete-Nucleotide-Human-2020-05-11.one_line	470877038	1000	5	ATGCN_12344	261000	13.1716	7.864	12.0966	13.7207	8.4169	8.1851	8.1594
DNA-Genome-Strongylocentrotus-purpuratus-GCF_000002235.4-2015-03-10.one_line	659082267	1000	5	ATGCN_12344	251000	23.8514	25.5625	24.239	26.7841	25.888	25.9303	25.8518
DNA-Mitochondrion-2019-03-15.one_line	241606731	1000	5	ATGCN_12344	41000	23.061	22.9341	23.2439	26.2317	24.9244	24.6512	24.8
DNA-Genome-Astrammina-rara-GCA_000211355.2-2011-04-27.one_line	1362918	1000	5	ATGCN_12344	13000	24.8077	26.8231	25.8308	27.9769	30.0692	29.5154	29.5077
DNA-Influenza-2019-04-27.one_line	1106180040	1000	5	ATGCN_12344	8000	23.1	18.2625	22.025	25.425	22.9625	21.7375	21.8
DNA-Genome-Cryptosporidium-parvum-Iowa-II-GCA_000165345.1-2007-02-26.one_line	7012512	1000	5	ATGCN_12344	8000	24.1375	25.6875	25.525	27.7875	30.3625	29.6625	29.5
DNA-Genome-Spironucleus-salmonicida-GCA_000497125.1-2013-11-19.one_line	9934367	1000	5	ATGCN_12344	3000	37.2667
DNA-Genome-Picea-abies-GCA_900067695.1-2016-11-09.one_line	11960690255	2500	5	ATGCN_12344	27652500	22.5193	21.2028	22.4772	26.2478	19.9542	20.5212	20.4496
DNA-Helicobacter-2019-04-24.one_line	2711601413	2500	5	ATGCN_12344	1122500	22.534	23.0129	22.8314	25.2366	22.3268	22.3736	22.3127
DNA-NCBI-Virus-Complete-Nucleotide-Human-2020-05-11.one_line	470877038	2500	5	ATGCN_12344	357500	13.1832	7.5024	12.1421	13.7597	8.1418	7.8347	7.831
DNA-Genome-Strongylocentrotus-purpuratus-GCF_000002235.4-2015-03-10.one_line	659082267	2500	5	ATGCN_12344	130000	23.4	23.4408	23.5308	25.8385	24.0569	24.0615	24.0369
DNA-Mitochondrion-2019-03-15.one_line	241606731	2500	5	ATGCN_12344	75000	22.6427	23.5773	23.3307	25.9813	24.8093	24.6453	24.6827
DNA-Genome-Cryptosporidium-parvum-Iowa-II-GCA_000165345.1-2007-02-26.one_line	7012512	2500	5	ATGCN_12344	32500	23.6954	26.0369	24.48	26.9938	27.5569	27.36	27.2985
DNA-Influenza-2019-04-27.one_line	1106180040	2500	5	ATGCN_12344	12500	18.128	11.104	16.72	19.528	14.096	13.056	13.216
DNA-Genome-Spironucleus-salmonicida-GCA_000497125.1-2013-11-19.one_line	9934367	2500	5	ATGCN_12344	7500	24.7333	26.2667	25.8667	28.0667	31.5733	30.48	30.1867
DNA-Genome-Astrammina-rara-GCA_000211355.2-2011-04-27.one_line	1362918	2500	5	ATGCN_12344	5000	25.42	26.9	26.88	28.56	33.68	31.66	32.24
DNA-Genome-Picea-abies-GCA_900067695.1-2016-11-09.one_line	11960690255	5000	5	ATGCN_12344	38220000	22.8015	21.7187	22.9153	26.3479	20.2497	21.0018	20.9723
DNA-Helicobacter-2019-04-24.one_line	2711601413	5000	5	ATGCN_12344	1520000	22.5878	23.3061	22.9032	25.5323	22.4824	22.5445	22.4697
DNA-NCBI-Virus-Complete-Nucleotide-Human-2020-05-11.one_line	470877038	5000	5	ATGCN_12344	500000	13.1788	7.1378	12.234	13.7472	7.5232	7.382	7.3976
DNA-Mitochondrion-2019-03-15.one_line	241606731	5000	5	ATGCN_12344	125000	22.3856	23.3648	23.064	25.9848	24.2296	24.1528	24.1184
DNA-Genome-Strongylocentrotus-purpuratus-GCF_000002235.4-2015-03-10.one_line	659082267	5000	5	ATGCN_12344	65000	23.2892	22.6908	23.4738	25.6046	23.4892	23.3831	23.3908
DNA-Genome-Cryptosporidium-parvum-Iowa-II-GCA_000165345.1-2007-02-26.one_line	7012512	5000	5	ATGCN_12344	30000	23.6067	25.96	24.4267	27.06	27.6533	27.4867	27.4133
DNA-Influenza-2019-04-27.one_line	1106180040	5000	5	ATGCN_12344	15000	17.0867	10.6	14.9733	18.4667	13.18	12.1733	12.4
DNA-Genome-Spironucleus-salmonicida-GCA_000497125.1-2013-11-19.one_line	9934367	5000	5	ATGCN_12344	5000	24.86	26.12	26.2	28.1	30.51	31.02	31.68
DNA-Genome-Picea-abies-GCA_900067695.1-2016-11-09.one_line	11960690255	10000	5	ATGCN_12344	40790000	23.1276	22.3328	23.2886	26.4673	20.7975	21.566	21.5741
DNA-Helicobacter-2019-04-24.one_line	2711601413	10000	5	ATGCN_12344	1970000	22.8737	23.9901	23.2521	25.8501	23.0811	23.0874	23.0792
DNA-NCBI-Virus-Complete-Nucleotide-Human-2020-05-11.one_line	470877038	10000	5	ATGCN_12344	770000	13.2003	6.8558	12.341	13.7804	7.1084	7.0323	6.9995
DNA-Mitochondrion-2019-03-15.one_line	241606731	10000	5	ATGCN_12344	160000	22.0531	23.185	22.5725	25.5175	23.7975	23.7631	23.77
DNA-Genome-Strongylocentrotus-purpuratus-GCF_000002235.4-2015-03-10.one_line	659082267	10000	5	ATGCN_12344	50000	22.198	19.972	22.056	24.056	20.828	20.714	20.704
DNA-Genome-Cryptosporidium-parvum-Iowa-II-GCA_000165345.1-2007-02-26.one_line	7012512	10000	5	ATGCN_12344	50000	23.458	25.624	24.156	26.72	26.832	26.606	26.592
DNA-Influenza-2019-04-27.one_line	1106180040	10000	5	ATGCN_12344	10000	14.86	8.46	13.58	16.38	12	10.47	10.84
DNA-Genome-Spironucleus-salmonicida-GCA_000497125.1-2013-11-19.one_line	9934367	10000	5	ATGCN_12344	10000	24.72	26.97	25.76	27.96	30.58	29.97	29.92
DNA-Genome-Picea-abies-GCA_900067695.1-2016-11-09.one_line	11960690255	25	5	ATGCN_22233	1012825	25.3861	27.3567	26.0566	28.7289	27.5193	27.5932	27.5278
DNA-Genome-Strongylocentrotus-purpuratus-GCF_000002235.4-2015-03-10.one_line	659082267	25	5	ATGCN_22233	313725	26.2446	27.7249	27.134	29.5842	29.2014	29.1972	29.1733
DNA-Influenza-2019-04-27.one_line	1106180040	25	5	ATGCN_22233	33200	25.9157	25.2199	26.7349	28.5843	27.9458	27.6657	27.747
DNA-NCBI-Virus-Complete-Nucleotide-Human-2020-05-11.one_line	470877038	25	5	ATGCN_22233	21000	23.1286	20.3143	23.6476	24.8	24.3286	23.1048	23.219
DNA-Helicobacter-2019-04-24.one_line	2711601413	25	5	ATGCN_22233	20475	25.8071	27.6337	27.1941	29.431	30.2613	29.9536	29.8901
DNA-Mitochondrion-2019-03-15.one_line	241606731	25	5	ATGCN_22233	6275	28.1116	27.6813	30.1195	31.3625	35.761	34.3586	34.6135
DNA-Genome-Astrammina-rara-GCA_000211355.2-2011-04-27.one_line	1362918	25	5	ATGCN_22233	3275	29.3435	27.8779	31.7557	32.5496	40.7634	37.4656	38.5954
DNA-Genome-Salpingoeca-rosetta-GCA_000188695.1-2011-02-10.one_line	37299580	25	5	ATGCN_22233	2050	29.3659	30.0976	32	33.122	42.5366	37.8537	39.0244
DNA-Genome-Chondrus-crispus-GCA_000350225.2-2013-05-22.one_line	77592685	25	5	ATGCN_22233	1600	30.875	30.625	33.75	34.6875	46.25	39.75	41.75
DNA-Genome-Fusarium-graminearum-PH-1-GCF_000240135.3-2008-11-21.one_line	34133023	25	5	ATGCN_22233	550	38.5455	32	42.5455	39.6364	70	51.0909	57.4545
DNA-Genome-Spironucleus-salmonicida-GCA_000497125.1-2013-11-19.one_line	9934367	25	5	ATGCN_22233	250	49.6	35.2	56.8	51.2	107.2	65.2	78.4
DNA-Genome-Cryptosporidium-parvum-Iowa-II-GCA_000165345.1-2007-02-26.one_line	7012512	25	5	ATGCN_22233	175	58.2857	37.7143	72	54.2857	138.857	79.4286	98.2857
DNA-Genome-Picea-abies-GCA_900067695.1-2016-11-09.one_line	11960690255	50	5	ATGCN_22233	3594700	23.5933	24.6979	23.9938	27.1123	24.2659	24.2377	24.2678
DNA-Genome-Strongylocentrotus-purpuratus-GCF_000002235.4-2015-03-10.one_line	659082267	50	5	ATGCN_22233	885400	25.1249	27.2129	25.8256	28.396	27.6314	27.6882	27.6277
DNA-Influenza-2019-04-27.one_line	1106180040	50	5	ATGCN_22233	98100	22.3619	19.7768	22.6116	24.2161	20.897	20.2497	20.2813
DNA-Helicobacter-2019-04-24.one_line	2711601413	50	5	ATGCN_22233	68700	23.9549	25.6638	24.8472	27.4265	26.869	26.4643	26.5386
DNA-NCBI-Virus-Complete-Nucleotide-Human-2020-05-11.one_line	470877038	50	5	ATGCN_22233	52400	20.895	17.9504	21.126	22.5115	20.5821	19.5611	19.3969
DNA-Mitochondrion-2019-03-15.one_line	241606731	50	5	ATGCN_22233	14050	26.6619	27.0107	28.0285	29.9075	31.5872	30.9324	31.032
DNA-Genome-Astrammina-rara-GCA_000211355.2-2011-04-27.one_line	1362918	50	5	ATGCN_22233	7900	27.3797	27.7722	29.0633	30.3544	34.4937	33.5949	33.6203
DNA-Genome-Salpingoeca-rosetta-GCA_000188695.1-2011-02-10.one_line	37299580	50	5	ATGCN_22233	6150	25.6911	27.6911	27.5447	29.3333	33.5447	32.2114	32.3902
DNA-Genome-Chondrus-crispus-GCA_000350225.2-2013-05-22.one_line	77592685	50	5	ATGCN_22233	4200	26.5	28.1667	28.3333	30.119	35.7381	33.5	34.0952
DNA-Genome-Fusarium-graminearum-PH-1-GCF_000240135.3-2008-11-21.one_line	34133023	50	5	ATGCN_22233	1400	30.2143	30.2143	32.7143	33.2143	47.5714	40.1429	42.5714
DNA-Genome-Spironucleus-salmonicida-GCA_000497125.1-2013-11-19.one_line	9934367	50	5	ATGCN_22233	850	33.1765	31.8824	36.4706	36.8235	56.3529	44.3529	48
DNA-Genome-Cryptosporidium-parvum-Iowa-II-GCA_000165345.1-2007-02-26.one_line	7012512	50	5	ATGCN_22233	350	42.8571	32.2857	49.7143	45.1429	88	58.2857	67.4286
DNA-Genome-WS1-bacterium-JGI-0000059-K21-GCA_000398605.1-2013-05-16.one_line	509551	50	5	ATGCN_22233	50	104	62	160	118	370	140	200
DNA-Genome-Picea-abies-GCA_900067695.1-2016-11-09.one_line	11960690255	100	5	ATGCN_22233	8231900	22.7111	22.0992	22.946	26.5322	21.6293	21.6613	21.6168
DNA-Genome-Strongylocentrotus-purpuratus-GCF_000002235.4-2015-03-10.one_line	659082267	100	5	ATGCN_22233	2105800	24.3415	26.4573	24.8833	27.3826	26.5133	26.6121	26.5051
DNA-Helicobacter-2019-04-24.one_line	2711601413	100	5	ATGCN_22233	277200	22.6843	24.2417	23.3304	25.6955	24.3842	24.2435	24.176
DNA-Influenza-2019-04-27.one_line	1106180040	100	5	ATGCN_22233	239300	18.2436	14.2929	18.2115	19.4476	14.7221	14.3719	14.1964
DNA-NCBI-Virus-Complete-Nucleotide-Human-2020-05-11.one_line	470877038	100	5	ATGCN_22233	127600	17.424	13.8926	17.4013	18.5674	15.4647	14.9052	14.8433
DNA-Mitochondrion-2019-03-15.one_line	241606731	100	5	ATGCN_22233	27900	25.6022	25.7921	26.4588	28.4767	28.5161	28.0968	28.1147
DNA-Genome-Astrammina-rara-GCA_000211355.2-2011-04-27.one_line	1362918	100	5	ATGCN_22233	20700	26.1691	27.6715	27.2464	29.1256	30.8454	30.4348	30.4928
DNA-Genome-Chondrus-crispus-GCA_000350225.2-2013-05-22.one_line	77592685	100	5	ATGCN_22233	11100	24.6306	26.7928	25.7658	27.6667	30.5766	30.1261	30.018
DNA-Genome-Salpingoeca-rosetta-GCA_000188695.1-2011-02-10.one_line	37299580	100	5	ATGCN_22233	10900	24.5505	26.6147	25.6881	27.6147	30.7248	30.1193	30.0917
DNA-Genome-Fusarium-graminearum-PH-1-GCF_000240135.3-2008-11-21.one_line	34133023	100	5	ATGCN_22233	4700	25.5532	27.0638	27.0638	28.5319	33.7872	32.3617	32.2553
DNA-Genome-Spironucleus-salmonicida-GCA_000497125.1-2013-11-19.one_line	9934367	100	5	ATGCN_22233	3200	26.0625	26.9688	27.625	29.375	35.9063	33.0313	33.625
DNA-Genome-Cryptosporidium-parvum-Iowa-II-GCA_000165345.1-2007-02-26.one_line	7012512	100	5	ATGCN_22233	300	44.6667	32.6667	52	47.6667	95.6667	61	72
DNA-Genome-WS1-bacterium-JGI-0000059-K21-GCA_000398605.1-2013-05-16.one_line	509551	100	5	ATGCN_22233	100	72	45	96	73	235	95	124
DNA-Genome-Picea-abies-GCA_900067695.1-2016-11-09.one_line	11960690255	125	5	ATGCN_22233	10410500	22.593	21.7045	22.7953	26.5379	21.1585	21.2203	21.1503
DNA-Genome-Strongylocentrotus-purpuratus-GCF_000002235.4-2015-03-10.one_line	659082267	125	5	ATGCN_22233	2890375	23.9276	26.0439	24.4157	26.8688	25.9795	25.9888	25.9741
DNA-Helicobacter-2019-04-24.one_line	2711601413	125	5	ATGCN_22233	390500	22.1708	23.0661	22.6545	24.8968	23.1985	22.9818	22.8528
DNA-Influenza-2019-04-27.one_line	1106180040	125	5	ATGCN_22233	321625	16.878	12.7263	16.8525	17.9128	13.1059	12.8314	12.647
DNA-NCBI-Virus-Complete-Nucleotide-Human-2020-05-11.one_line	470877038	125	5	ATGCN_22233	172375	15.9014	12.2204	15.732	16.8986	13.6168	13.1028	12.9532
DNA-Mitochondrion-2019-03-15.one_line	241606731	125	5	ATGCN_22233	36875	25.2176	24.9871	25.9417	27.9756	27.3329	26.7525	26.9342
DNA-Genome-Astrammina-rara-GCA_000211355.2-2011-04-27.one_line	1362918	125	5	ATGCN_22233	27625	25.9077	27.5222	26.8525	28.6516	30.1719	29.9041	29.8715
DNA-Genome-Salpingoeca-rosetta-GCA_000188695.1-2011-02-10.one_line	37299580	125	5	ATGCN_22233	14250	24.0772	26.3158	25.0947	27.1018	29.4526	29.2281	28.9123
DNA-Genome-Chondrus-crispus-GCA_000350225.2-2013-05-22.one_line	77592685	125	5	ATGCN_22233	12500	24.52	26.672	25.6	27.552	30.408	29.616	29.632
DNA-Genome-Spironucleus-salmonicida-GCA_000497125.1-2013-11-19.one_line	9934367	125	5	ATGCN_22233	5750	24.2783	25.7913	25.6348	27.287	33.24	30.5391	30.6087
DNA-Genome-Fusarium-graminearum-PH-1-GCF_000240135.3-2008-11-21.one_line	34133023	125	5	ATGCN_22233	5625	24.8	26.4178	25.9911	27.8756	33.0667	31.2356	31.4311
DNA-Genome-Cryptosporidium-parvum-Iowa-II-GCA_000165345.1-2007-02-26.one_line	7012512	125	5	ATGCN_22233	625	35.52	30.88	39.36	38.24	64	47.36	52.48
DNA-Genome-Picea-abies-GCA_900067695.1-2016-11-09.one_line	11960690255	150	5	ATGCN_22233	12655500	22.5021	21.4622	22.6864	26.539	20.843	20.9579	20.8719
DNA-Genome-Strongylocentrotus-purpuratus-GCF_000002235.4-2015-03-10.one_line	659082267	150	5	ATGCN_22233	5169000	23.1321	25.2882	23.5695	25.9298	24.992	24.9908	24.9975
DNA-Helicobacter-2019-04-24.one_line	2711601413	150	5	ATGCN_22233	489150	21.9113	22.3199	22.3281	24.3776	22.2353	22.2353	22.0619
DNA-Influenza-2019-04-27.one_line	1106180040	150	5	ATGCN_22233	391050	15.8798	11.6497	15.7918	16.8347	11.9315	11.7151	11.5259
DNA-NCBI-Virus-Complete-Nucleotide-Human-2020-05-11.one_line	470877038	150	5	ATGCN_22233	220950	14.9025	11.2863	14.6558	15.7936	12.3806	11.9805	11.8253
DNA-Mitochondrion-2019-03-15.one_line	241606731	150	5	ATGCN_22233	41550	25.0878	24.722	25.728	27.6943	26.8255	26.284	26.3971
DNA-Genome-Astrammina-rara-GCA_000211355.2-2011-04-27.one_line	1362918	150	5	ATGCN_22233	34800	25.7356	27.4713	26.5517	28.4799	29.7759	29.4511	29.6092
DNA-Genome-Chondrus-crispus-GCA_000350225.2-2013-05-22.one_line	77592685	150	5	ATGCN_22233	17400	23.7644	26.0057	24.5977	26.7586	29.2299	28.4195	28.4828
DNA-Genome-Salpingoeca-rosetta-GCA_000188695.1-2011-02-10.one_line	37299580	150	5	ATGCN_22233	16500	24.0182	26.2727	24.9455	27.0303	29.3152	28.8667	28.6303
DNA-Genome-Fusarium-graminearum-PH-1-GCF_000240135.3-2008-11-21.one_line	34133023	150	5	ATGCN_22233	6900	24.7971	26.2609	25.971	27.4638	31.7971	30.3333	30.6087
DNA-Genome-Spironucleus-salmonicida-GCA_000497125.1-2013-11-19.one_line	9934367	150	5	ATGCN_22233	6750	24.2815	25.7185	25.3926	27.1556	31.1605	30.0148	29.9852
DNA-Genome-Cryptosporidium-parvum-Iowa-II-GCA_000165345.1-2007-02-26.one_line	7012512	150	5	ATGCN_22233	450	38.6667	30.6667	44.4444	41.5556	78	54.8889	62.2222
DNA-Genome-Picea-abies-GCA_900067695.1-2016-11-09.one_line	11960690255	250	5	ATGCN_22233	21559250	22.7372	20.9254	22.4471	26.6485	20.0588	20.469	20.3955
DNA-Genome-Strongylocentrotus-purpuratus-GCF_000002235.4-2015-03-10.one_line	659082267	250	5	ATGCN_22233	10064500	23.3046	25.2988	23.6579	26.0338	24.7401	24.7527	24.7368
DNA-Helicobacter-2019-04-24.one_line	2711601413	250	5	ATGCN_22233	861500	21.696	21.5438	21.9547	23.9136	21.2449	21.207	21.0428
DNA-Influenza-2019-04-27.one_line	1106180040	250	5	ATGCN_22233	701250	13.2439	8.8476	13.0284	13.9402	9.1214	9.0052	8.7558
DNA-NCBI-Virus-Complete-Nucleotide-Human-2020-05-11.one_line	470877038	250	5	ATGCN_22233	459750	11.299	8.1138	11.1321	11.794	9.0564	8.5947	8.4785
DNA-Genome-Astrammina-rara-GCA_000211355.2-2011-04-27.one_line	1362918	250	5	ATGCN_22233	60750	25.3959	27.2033	26.051	28.0033	28.7407	28.4889	28.5366
DNA-Mitochondrion-2019-03-15.one_line	241606731	250	5	ATGCN_22233	57500	24.6626	24.0383	25.1478	27.1687	25.4209	25.0209	25.0922
DNA-Genome-Chondrus-crispus-GCA_000350225.2-2013-05-22.one_line	77592685	250	5	ATGCN_22233	35500	23.5211	25.7099	24.1296	26.2732	28.0113	27.2676	27.1437
DNA-Genome-Salpingoeca-rosetta-GCA_000188695.1-2011-02-10.one_line	37299580	250	5	ATGCN_22233	19000	23.7579	26.1	24.4842	26.6579	29.0053	28.0895	28.1053
DNA-Genome-Spironucleus-salmonicida-GCA_000497125.1-2013-11-19.one_line	9934367	250	5	ATGCN_22233	12750	24.2824	26.3922	25.1137	27.0745	29.6085	29.1765	29.3961
DNA-Genome-Fusarium-graminearum-PH-1-GCF_000240135.3-2008-11-21.one_line	34133023	250	5	ATGCN_22233	11000	23.8818	25.8091	24.7273	26.4455	30.0909	28.8182	28.7636
DNA-Genome-Cryptosporidium-parvum-Iowa-II-GCA_000165345.1-2007-02-26.one_line	7012512	250	5	ATGCN_22233	750	34	29.3333	37.0667	36.9333	60.4	46.5333	51.2
DNA-Genome-Picea-abies-GCA_900067695.1-2016-11-09.one_line	11960690255	500	5	ATGCN_22233	43893500	22.8831	20.4612	22.6993	26.7416	19.0043	20.081	20.0052
DNA-Genome-Strongylocentrotus-purpuratus-GCF_000002235.4-2015-03-10.one_line	659082267	500	5	ATGCN_22233	22880500	23.4984	24.8924	23.6775	26.1849	24.1233	24.365	24.3146
DNA-Helicobacter-2019-04-24.one_line	2711601413	500	5	ATGCN_22233	1771000	21.0936	19.8591	21.1342	23.5444	19.37	19.4501	19.3005
DNA-Influenza-2019-04-27.one_line	1106180040	500	5	ATGCN_22233	1526500	10.2648	6.2145	10.0029	12.4671	6.7146	6.4382	6.1707
DNA-NCBI-Virus-Complete-Nucleotide-Human-2020-05-11.one_line	470877038	500	5	ATGCN_22233	934000	9.4276	6.4514	9.2272	9.7899	7.0604	6.7411	6.6223
DNA-Genome-Astrammina-rara-GCA_000211355.2-2011-04-27.one_line	1362918	500	5	ATGCN_22233	131500	25.1072	27.1202	25.5909	27.638	27.7118	27.6061	27.6471
DNA-Mitochondrion-2019-03-15.one_line	241606731	500	5	ATGCN_22233	102500	23.9454	22.5541	24.2654	26.2068	23.282	23.0712	23.0049
DNA-Genome-Chondrus-crispus-GCA_000350225.2-2013-05-22.one_line	77592685	500	5	ATGCN_22233	71000	22.9704	25.1141	23.3634	25.5056	26.4873	26.0676	25.8704
DNA-Genome-Fusarium-graminearum-PH-1-GCF_000240135.3-2008-11-21.one_line	34133023	500	5	ATGCN_22233	28000	22.5714	24.775	23.1286	24.9679	26.7107	26.45	26.6
DNA-Genome-Salpingoeca-rosetta-GCA_000188695.1-2011-02-10.one_line	37299580	500	5	ATGCN_22233	24000	23.3042	25.6958	23.9833	26.0875	27.6042	27.2625	27.0167
DNA-Genome-Spironucleus-salmonicida-GCA_000497125.1-2013-11-19.one_line	9934367	500	5	ATGCN_22233	22500	24.52	25.6844	24.9333	27.0533	27.396	27.6133	27.5733
DNA-Genome-Cryptosporidium-parvum-Iowa-II-GCA_000165345.1-2007-02-26.one_line	7012512	500	5	ATGCN_22233	2000	27.45	27.95	29.3	31.4	41.05	35.65	37.2
DNA-Genome-Picea-abies-GCA_900067695.1-2016-11-09.one_line	11960690255	750	5	ATGCN_22233	66072750	22.9744	20.367	22.8519	26.7814	18.46	20.0087	19.9691
DNA-Genome-Strongylocentrotus-purpuratus-GCF_000002235.4-2015-03-10.one_line	659082267	750	5	ATGCN_22233	32887500	23.673	24.8071	23.7938	26.3357	23.8648	24.3	24.2585
DNA-Helicobacter-2019-04-24.one_line	2711601413	750	5	ATGCN_22233	2766000	20.5644	18.6255	20.4829	22.8457	18.1031	18.1992	18.062
DNA-Influenza-2019-04-27.one_line	1106180040	750	5	ATGCN_22233	2381250	8.8678	5.143	8.5951	11.8586	5.5535	5.3978	5.1302
DNA-NCBI-Virus-Complete-Nucleotide-Human-2020-05-11.one_line	470877038	750	5	ATGCN_22233	1391250	8.5295	5.6686	8.2751	8.8311	6.0962	5.776	5.7557
DNA-Genome-Chondrus-crispus-GCA_000350225.2-2013-05-22.one_line	77592685	750	5	ATGCN_22233	193500	22.462	24.5778	22.7628	24.8661	24.938	25.0811	24.7049
DNA-Genome-Astrammina-rara-GCA_000211355.2-2011-04-27.one_line	1362918	750	5	ATGCN_22233	189750	25.0045	27.1868	25.4124	27.5341	27.6269	27.404	27.3602
DNA-Mitochondrion-2019-03-15.one_line	241606731	750	5	ATGCN_22233	143250	23.6168	22.3714	23.8171	25.815	22.867	22.5948	22.7016
DNA-Genome-Fusarium-graminearum-PH-1-GCF_000240135.3-2008-11-21.one_line	34133023	750	5	ATGCN_22233	76500	22.298	24.7137	22.7739	24.4915	25.4667	25.5359	25.417
DNA-Genome-Salpingoeca-rosetta-GCA_000188695.1-2011-02-10.one_line	37299580	750	5	ATGCN_22233	53250	22.2066	24.6629	22.6817	24.5315	25.3577	25.2864	25.2469
DNA-Genome-Spironucleus-salmonicida-GCA_000497125.1-2013-11-19.one_line	9934367	750	5	ATGCN_22233	46500	24.0516	25.471	24.2409	26.5161	25.7494	26.6688	26.5806
DNA-Genome-Cryptosporidium-parvum-Iowa-II-GCA_000165345.1-2007-02-26.one_line	7012512	750	5	ATGCN_22233	4500	25.6889	26.8222	27.2	29.1333	34.0667	31.8222	32.3556
DNA-Genome-Picea-abies-GCA_900067695.1-2016-11-09.one_line	11960690255	1000	5	ATGCN_22233	87061000	23.1219	20.3642	22.9549	26.8077	18.1423	20.0104	19.9621
DNA-Genome-Strongylocentrotus-purpuratus-GCF_000002235.4-2015-03-10.one_line	659082267	1000	5	ATGCN_22233	41833000	23.7774	24.777	23.849	26.4146	23.6914	24.2511	24.2169
DNA-Helicobacter-2019-04-24.one_line	2711601413	1000	5	ATGCN_22233	3660000	20.3291	17.975	20.2021	23.3554	17.3912	17.5067	17.3776
DNA-Influenza-2019-04-27.one_line	1106180040	1000	5	ATGCN_22233	3260000	7.9672	4.5029	7.7116	11.3833	4.717	4.8021	4.5304
DNA-NCBI-Virus-Complete-Nucleotide-Human-2020-05-11.one_line	470877038	1000	5	ATGCN_22233	1771000	8.006	5.2149	7.7179	8.9871	5.5585	5.337	5.2544
DNA-Genome-Chondrus-crispus-GCA_000350225.2-2013-05-22.one_line	77592685	1000	5	ATGCN_22233	257000	22.9047	25.1331	23.2039	25.2883	25.3074	25.1992	25.0086
DNA-Genome-Astrammina-rara-GCA_000211355.2-2011-04-27.one_line	1362918	1000	5	ATGCN_22233	248000	24.9802	27.146	25.3565	27.4617	27.2073	27.1617	27.171
DNA-Mitochondrion-2019-03-15.one_line	241606731	1000	5	ATGCN_22233	196000	23.4985	22.3847	23.699	25.7291	22.4281	22.4934	22.3245
DNA-Genome-Fusarium-graminearum-PH-1-GCF_000240135.3-2008-11-21.one_line	34133023	1000	5	ATGCN_22233	111000	22.8009	25.2577	23.182	25.0523	25.7468	25.8396	25.7622
DNA-Genome-Spironucleus-salmonicida-GCA_000497125.1-2013-11-19.one_line	9934367	1000	5	ATGCN_22233	66000	23.9045	24.747	23.9545	26.1561	25.5266	25.4939	25.4545
DNA-Genome-Salpingoeca-rosetta-GCA_000188695.1-2011-02-10.one_line	37299580	1000	5	ATGCN_22233	43000	22.5186	24.1047	22.9163	24.7953	25.1953	24.9	24.6884
DNA-Genome-Cryptosporidium-parvum-Iowa-II-GCA_000165345.1-2007-02-26.one_line	7012512	1000	5	ATGCN_22233	4512	25.1773	26.9725	26.5514	28.6126	33.5993	31.5603	31.9149
DNA-Genome-Picea-abies-GCA_900067695.1-2016-11-09.one_line	11960690255	2500	5	ATGCN_22233	201090000	23.3832	20.6629	23.2699	26.854	17.8014	20.2414	20.242
DNA-Genome-Strongylocentrotus-purpuratus-GCF_000002235.4-2015-03-10.one_line	659082267	2500	5	ATGCN_22233	82717500	23.8818	24.6946	23.9088	26.448	23.1755	24.0924	24.0741
DNA-Helicobacter-2019-04-24.one_line	2711601413	2500	5	ATGCN_22233	8830000	19.3471	15.6352	19.121	23.6398	15.0371	15.1431	15.0132
DNA-Influenza-2019-04-27.one_line	1106180040	2500	5	ATGCN_22233	7462500	5.8929	3.214	5.725	10.3817	3.5285	3.6436	3.3297
DNA-NCBI-Virus-Complete-Nucleotide-Human-2020-05-11.one_line	470877038	2500	5	ATGCN_22233	3535000	7.3999	4.6372	7.1207	8.8333	4.8022	4.6846	4.6159
DNA-Genome-Chondrus-crispus-GCA_000350225.2-2013-05-22.one_line	77592685	2500	5	ATGCN_22233	557500	23.5496	25.5555	23.7876	25.8793	25.2728	25.2653	25.1222
DNA-Genome-Astrammina-rara-GCA_000211355.2-2011-04-27.one_line	1362918	2500	5	ATGCN_22233	430000	24.9098	27.1381	25.2405	27.3651	26.9086	27.2486	26.9721
DNA-Mitochondrion-2019-03-15.one_line	241606731	2500	5	ATGCN_22233	392500	23.4206	21.3643	23.5618	25.5531	20.8953	20.9529	20.8061
DNA-Genome-Fusarium-graminearum-PH-1-GCF_000240135.3-2008-11-21.one_line	34133023	2500	5	ATGCN_22233	312500	23.3962	26.0915	23.7126	25.6032	25.849	26.1373	25.7485
DNA-Genome-Spironucleus-salmonicida-GCA_000497125.1-2013-11-19.one_line	9934367	2500	5	ATGCN_22233	157500	23.7594	24.7543	23.6952	26.0146	24.9505	25.0825	25.0184
DNA-Genome-Salpingoeca-rosetta-GCA_000188695.1-2011-02-10.one_line	37299580	2500	5	ATGCN_22233	22500	22.0133	19.8356	22.0711	23.8533	21.4267	21.1689	21.0667
DNA-Genome-Cryptosporidium-parvum-Iowa-II-GCA_000165345.1-2007-02-26.one_line	7012512	2500	5	ATGCN_22233	7500	24.4933	26.3467	25.6	27.4667	31.1067	30.0267	29.9733
DNA-Genome-Picea-abies-GCA_900067695.1-2016-11-09.one_line	11960690255	5000	5	ATGCN_22233	362770000	23.5567	21.0364	23.4837	26.8649	17.9416	20.554	20.5741
DNA-Genome-Strongylocentrotus-purpuratus-GCF_000002235.4-2015-03-10.one_line	659082267	5000	5	ATGCN_22233	128425000	23.8084	24.5201	23.8443	26.3199	22.8356	23.8787	23.8522
DNA-Helicobacter-2019-04-24.one_line	2711601413	5000	5	ATGCN_22233	16970000	18.3754	13.7526	18.0829	24.4031	13.1496	13.3819	13.2578
DNA-Influenza-2019-04-27.one_line	1106180040	5000	5	ATGCN_22233	13230000	4.7147	2.5708	4.6032	9.8628	2.8734	3.0699	2.7531
DNA-NCBI-Virus-Complete-Nucleotide-Human-2020-05-11.one_line	470877038	5000	5	ATGCN_22233	6525000	6.6299	4.0813	6.3821	8.3733	4.1754	4.1266	4.0402
DNA-Genome-Chondrus-crispus-GCA_000350225.2-2013-05-22.one_line	77592685	5000	5	ATGCN_22233	1105000	23.7414	25.403	23.8824	26.058	24.6024	24.9934	24.6881
DNA-Genome-Fusarium-graminearum-PH-1-GCF_000240135.3-2008-11-21.one_line	34133023	5000	5	ATGCN_22233	645000	23.4484	26.1738	23.6921	25.6757	25.6392	25.7414	25.6589
DNA-Mitochondrion-2019-03-15.one_line	241606731	5000	5	ATGCN_22233	600000	23.4185	21.0393	23.476	25.4347	20.5233	20.4902	20.4553
DNA-Genome-Astrammina-rara-GCA_000211355.2-2011-04-27.one_line	1362918	5000	5	ATGCN_22233	575000	24.8769	27.1574	25.1857	27.3294	26.7357	27.168	26.5857
DNA-Genome-Spironucleus-salmonicida-GCA_000497125.1-2013-11-19.one_line	9934367	5000	5	ATGCN_22233	370000	23.5595	24.3411	23.6292	25.8319	24.2713	24.4895	24.3351
DNA-Genome-Salpingoeca-rosetta-GCA_000188695.1-2011-02-10.one_line	37299580	5000	5	ATGCN_22233	20000	20.35	16.645	20.19	21.87	18.48	17.98	18.16
DNA-Genome-Cryptosporidium-parvum-Iowa-II-GCA_000165345.1-2007-02-26.one_line	7012512	5000	5	ATGCN_22233	15000	24.4333	26.8867	25.32	27.4667	29.3133	28.68	28.8267
DNA-Genome-Picea-abies-GCA_900067695.1-2016-11-09.one_line	11960690255	10000	5	ATGCN_22233	645400000	23.6426	21.3431	23.6337	26.8461	18.1559	20.8287	20.8592
DNA-Genome-Strongylocentrotus-purpuratus-GCF_000002235.4-2015-03-10.one_line	659082267	10000	5	ATGCN_22233	177310000	23.6667	24.3495	23.7151	26.1389	22.6195	23.6545	23.6303
DNA-Helicobacter-2019-04-24.one_line	2711601413	10000	5	ATGCN_22233	31650000	18.3961	11.9641	17.3297	25.0314	11.3305	11.9688	11.8574
DNA-Influenza-2019-04-27.one_line	1106180040	10000	5	ATGCN_22233	22600000	4.5015	2.1498	3.7858	9.363	2.4234	2.7115	2.4065
DNA-NCBI-Virus-Complete-Nucleotide-Human-2020-05-11.one_line	470877038	10000	5	ATGCN_22233	11190000	5.9112	3.4769	5.6696	8.4466	3.5226	3.5515	3.446
DNA-Genome-Chondrus-crispus-GCA_000350225.2-2013-05-22.one_line	77592685	10000	5	ATGCN_22233	1730000	24.0236	24.8061	24.0853	26.2803	23.9918	23.9869	24.0768
DNA-Genome-Fusarium-graminearum-PH-1-GCF_000240135.3-2008-11-21.one_line	34133023	10000	5	ATGCN_22233	1290000	23.8795	26.7012	24.0616	26.1017	26.02	26.1168	26.0143
DNA-Mitochondrion-2019-03-15.one_line	241606731	10000	5	ATGCN_22233	880000	23.746	22.0024	23.8548	25.842	21.3727	21.3753	21.3273
DNA-Genome-Spironucleus-salmonicida-GCA_000497125.1-2013-11-19.one_line	9934367	10000	5	ATGCN_22233	780000	23.615	24.0846	23.7872	25.991	24.2592	24.484	24.3313
DNA-Genome-Astrammina-rara-GCA_000211355.2-2011-04-27.one_line	1362918	10000	5	ATGCN_22233	710000	24.872	27.1545	25.158	27.3383	26.5738	26.9975	26.7048
DNA-Genome-Cryptosporidium-parvum-Iowa-II-GCA_000165345.1-2007-02-26.one_line	7012512	10000	5	ATGCN_22233	20000	23.465	25.49	24.25	26.31	27.36	27.11	27.02
DNA-Genome-Picea-abies-GCA_900067695.1-2016-11-09.one_line	11960690255	25	5	ATNCG_12344	78675	21.5545	24.8719	22.6298	26.0947	24.938	24.8249	24.816
DNA-Genome-Strongylocentrotus-purpuratus-GCF_000002235.4-2015-03-10.one_line	659082267	25	5	ATNCG_12344	17025	22.7313	25.257	24.3994	27.5125	27.9824	27.5184	27.5595
DNA-Helicobacter-2019-04-24.one_line	2711601413	25	5	ATNCG_12344	3350	23.7612	25.5224	26.0896	28.5373	33.3433	30.209	31.2836
DNA-NCBI-Virus-Complete-Nucleotide-Human-2020-05-11.one_line	470877038	25	5	ATNCG_12344	2475	18.4242	15.4343	18.9091	20	26.3838	19.9596	21.1717
DNA-Mitochondrion-2019-03-15.one_line	241606731	25	5	ATNCG_12344	550	35.2727	27.6364	40	39.6364	64.9091	46	52.3636
DNA-Influenza-2019-04-27.one_line	1106180040	25	5	ATNCG_12344	200	51	36	61	54	116	64	80
DNA-Genome-Astrammina-rara-GCA_000211355.2-2011-04-27.one_line	1362918	25	5	ATNCG_12344	75	84	46.6667	117.333	85.3333	244	106.667	144
DNA-Genome-Salpingoeca-rosetta-GCA_000188695.1-2011-02-10.one_line	37299580	25	5	ATNCG_12344	25	160	84	284	204	640	200	320
DNA-Genome-Fusarium-graminearum-PH-1-GCF_000240135.3-2008-11-21.one_line	34133023	25	5	ATNCG_12344	25	160	116	284	208	640	204	320
DNA-Genome-Spironucleus-salmonicida-GCA_000497125.1-2013-11-19.one_line	9934367	25	5	ATNCG_12344	25	156	92	284	204	640	208	320
DNA-Genome-Picea-abies-GCA_900067695.1-2016-11-09.one_line	11960690255	50	5	ATNCG_12344	134150	19.9202	22.0634	20.823	23.9821	22.9884	22.773	22.8013
DNA-Genome-Strongylocentrotus-purpuratus-GCF_000002235.4-2015-03-10.one_line	659082267	50	5	ATNCG_12344	10300	22.4854	23.6117	24.3107	27.301	28.9029	28.1165	28.1942
DNA-Helicobacter-2019-04-24.one_line	2711601413	50	5	ATNCG_12344	8150	20.638	22.4908	22.2331	24.9571	27.1656	26.0491	26.3067
DNA-NCBI-Virus-Complete-Nucleotide-Human-2020-05-11.one_line	470877038	50	5	ATNCG_12344	2300	19.1739	17.087	19.3043	21.1304	28.4783	21.5652	23.1304
DNA-Mitochondrion-2019-03-15.one_line	241606731	50	5	ATNCG_12344	750	29.8667	27.3333	32.8	33.2	51.8667	37.8667	42.6667
DNA-Influenza-2019-04-27.one_line	1106180040	50	5	ATNCG_12344	100	69	45	90	72	181	77	108
DNA-Genome-Fusarium-graminearum-PH-1-GCF_000240135.3-2008-11-21.one_line	34133023	50	5	ATNCG_12344	50	100	52	148	122	326	118	176
DNA-Genome-Astrammina-rara-GCA_000211355.2-2011-04-27.one_line	1362918	50	5	ATNCG_12344	50	104	62	164	116	370	144	200
DNA-Genome-Picea-abies-GCA_900067695.1-2016-11-09.one_line	11960690255	100	5	ATNCG_12344	48700	13.0945	13.9199	13.7864	15.9733	16.9671	16.1622	15.7043
DNA-Helicobacter-2019-04-24.one_line	2711601413	100	5	ATNCG_12344	10200	19.0588	19.3627	20.1373	22.4118	24.549	22.3824	22.7059
DNA-Genome-Strongylocentrotus-purpuratus-GCF_000002235.4-2015-03-10.one_line	659082267	100	5	ATNCG_12344	3600	23.5278	23.5	25.6111	28.1944	33.6389	30.6944	31.4444
DNA-NCBI-Virus-Complete-Nucleotide-Human-2020-05-11.one_line	470877038	100	5	ATNCG_12344	2800	17.3214	13.6429	17.4286	18.8929	24.5714	18.1429	18.8571
DNA-Mitochondrion-2019-03-15.one_line	241606731	100	5	ATNCG_12344	1700	22.9412	21.8824	25.1765	27.8235	35.8824	29.4118	31.2941
DNA-Genome-Fusarium-graminearum-PH-1-GCF_000240135.3-2008-11-21.one_line	34133023	100	5	ATNCG_12344	200	45.5	33.5	56	50.5	108	56	72
DNA-Genome-Picea-abies-GCA_900067695.1-2016-11-09.one_line	11960690255	125	5	ATNCG_12344	30125	12.01	13.1187	12.7469	14.7054	16.2656	15.7278	15.1768
DNA-Helicobacter-2019-04-24.one_line	2711601413	125	5	ATNCG_12344	11125	16.9169	15.9551	17.5281	19.2899	22.2831	18.6157	18.8404
DNA-Genome-Strongylocentrotus-purpuratus-GCF_000002235.4-2015-03-10.one_line	659082267	125	5	ATNCG_12344	2625	24.1143	23.7333	26.4381	28.2667	36.2286	31.8476	32.9143
DNA-Mitochondrion-2019-03-15.one_line	241606731	125	5	ATNCG_12344	1875	22.1333	21.1733	24.32	26.9867	34.5067	28.64	30.5067
DNA-NCBI-Virus-Complete-Nucleotide-Human-2020-05-11.one_line	470877038	125	5	ATNCG_12344	1000	24.2	17	24.6	25	36.6	24	27.2
DNA-Genome-Fusarium-graminearum-PH-1-GCF_000240135.3-2008-11-21.one_line	34133023	125	5	ATNCG_12344	250	40	26	48	44.4	91.6	50	64
DNA-Genome-Cryptosporidium-parvum-Iowa-II-GCA_000165345.1-2007-02-26.one_line	7012512	125	5	ATNCG_12344	125	61.6	44	76.8	64.8	153.6	70.4	92.8
DNA-Genome-Picea-abies-GCA_900067695.1-2016-11-09.one_line	11960690255	150	5	ATNCG_12344	16500	12.5333	13.4909	13.3939	15.5212	17.1758	16.4	15.9273
DNA-Helicobacter-2019-04-24.one_line	2711601413	150	5	ATNCG_12344	13050	16.7663	14.8199	17.1648	18.9655	19.6628	17.7701	17.7778
DNA-Genome-Strongylocentrotus-purpuratus-GCF_000002235.4-2015-03-10.one_line	659082267	150	5	ATNCG_12344	3300	23.3636	23.7879	25.3939	27.7576	33.697	30.4848	31.3939
DNA-Mitochondrion-2019-03-15.one_line	241606731	150	5	ATNCG_12344	1650	21.3939	20.3636	23.5152	25.9394	33.5758	26.9697	29.0909
DNA-NCBI-Virus-Complete-Nucleotide-Human-2020-05-11.one_line	470877038	150	5	ATNCG_12344	1200	24.0833	17.8333	24.5	26.0833	35.75	25.9167	28.6667
DNA-Helicobacter-2019-04-24.one_line	2711601413	250	5	ATNCG_12344	3000	21.9333	22.0333	23.6667	26.6	32.5333	28.6333	29.4667
DNA-Mitochondrion-2019-03-15.one_line	241606731	250	5	ATNCG_12344	2750	17.3091	16.3636	18.7636	21.4545	27.2	21.0545	22.1091
DNA-Genome-Picea-abies-GCA_900067695.1-2016-11-09.one_line	11960690255	250	5	ATNCG_12344	1750	17.2571	17.1429	19.2	21.2	31.2	22.6286	24.2286
DNA-NCBI-Virus-Complete-Nucleotide-Human-2020-05-11.one_line	470877038	250	5	ATNCG_12344	250	42.4	29.6	50.4	45.2	96.8	53.6	67.2
DNA-Genome-Fusarium-graminearum-PH-1-GCF_000240135.3-2008-11-21.one_line	34133023	250	5	ATNCG_12344	250	39.2	30	46.4	42.8	89.6	46	59.2
DNA-Mitochondrion-2019-03-15.one_line	241606731	500	5	ATNCG_12344	5000	19.28	18.36	20.6	23.54	25.88	22.92	23.44
DNA-Genome-Fusarium-graminearum-PH-1-GCF_000240135.3-2008-11-21.one_line	34133023	500	5	ATNCG_12344	2500	19.6	20.52	21.76	23.96	29.8	25.36	26.4
DNA-Helicobacter-2019-04-24.one_line	2711601413	500	5	ATNCG_12344	1500	23.8667	21.8	25.7333	26.8667	39.2667	31.1333	33.0667
DNA-Mitochondrion-2019-03-15.one_line	241606731	750	5	ATNCG_12344	4500	20.1333	20.0444	21.6444	24.3778	26.6667	24.0222	24.5333
DNA-Helicobacter-2019-04-24.one_line	2711601413	750	5	ATNCG_12344	1500	23.8	22	25.6	27.0667	38.8	30.8667	33.0667
DNA-Genome-Fusarium-graminearum-PH-1-GCF_000240135.3-2008-11-21.one_line	34133023	750	5	ATNCG_12344	750	26.6667	22.9333	29.6	30	48.5333	33.8667	38.4
DNA-Mitochondrion-2019-03-15.one_line	241606731	1000	5	ATNCG_12344	4000	20.275	20.625	21.9	24.725	27.125	24.3	25.1
DNA-Helicobacter-2019-04-24.one_line	2711601413	1000	5	ATNCG_12344	1000	26.3	21.5	29.4	29	44.6	33.6	36.8
DNA-Genome-Fusarium-graminearum-PH-1-GCF_000240135.3-2008-11-21.one_line	34133023	1000	5	ATNCG_12344	1000	22.9	22.7	25	25.8	39.5	28.5	32
DNA-Genome-Picea-abies-GCA_900067695.1-2016-11-09.one_line	11960690255	25	5	ATNCG_22233	850025	21.4737	25.4268	22.1408	25.0954	24.4132	24.4399	24.4087
DNA-Genome-Strongylocentrotus-purpuratus-GCF_000002235.4-2015-03-10.one_line	659082267	25	5	ATNCG_22233	373850	21.27	24.6286	22.065	24.9255	24.8418	24.856	24.8121
DNA-Helicobacter-2019-04-24.one_line	2711601413	25	5	ATNCG_22233	33475	21.2308	24.5706	22.3331	25.0605	25.891	25.6341	25.655
DNA-NCBI-Virus-Complete-Nucleotide-Human-2020-05-11.one_line	470877038	25	5	ATNCG_22233	18175	16.5227	15.6644	16.9794	18.2448	19.1802	17.1059	17.2545
DNA-Influenza-2019-04-27.one_line	1106180040	25	5	ATNCG_22233	5975	24.4854	26.728	26.3431	28.5021	31.5649	29.9749	30.3933
DNA-Genome-Salpingoeca-rosetta-GCA_000188695.1-2011-02-10.one_line	37299580	25	5	ATNCG_22233	1600	26.4375	27.5625	28.875	29.5	41.6875	35.1875	37.25
DNA-Genome-Chondrus-crispus-GCA_000350225.2-2013-05-22.one_line	77592685	25	5	ATNCG_22233	1400	27.0714	27.5714	29.5714	30.3571	44	36.5714	38.8571
DNA-Mitochondrion-2019-03-15.one_line	241606731	25	5	ATNCG_22233	825	30.7879	29.3333	34.1818	34.0606	54.0606	41.5758	45.5758
DNA-Genome-Spironucleus-salmonicida-GCA_000497125.1-2013-11-19.one_line	9934367	25	5	ATNCG_22233	675	32.1481	30.963	35.8519	34.963	57.6296	42.2222	47.4074
DNA-Genome-Fusarium-graminearum-PH-1-GCF_000240135.3-2008-11-21.one_line	34133023	25	5	ATNCG_22233	625	33.28	31.2	36.48	35.84	60.64	44.16	49.28
DNA-Genome-Astrammina-rara-GCA_000211355.2-2011-04-27.one_line	1362918	25	5	ATNCG_22233	425	42.1176	31.5294	46.1176	44.4706	81.1765	56.7059	64.9412
DNA-Genome-Cryptosporidium-parvum-Iowa-II-GCA_000165345.1-2007-02-26.one_line	7012512	25	5	ATNCG_22233	50	104	56	156	116	370	128	184
DNA-Genome-Strongylocentrotus-purpuratus-GCF_000002235.4-2015-03-10.one_line	659082267	50	5	ATNCG_22233	1027150	19.848	22.6989	20.4527	22.8961	23.1142	23.0509	22.9809
DNA-Genome-Picea-abies-GCA_900067695.1-2016-11-09.one_line	11960690255	50	5	ATNCG_22233	722800	21.3042	24.1197	21.9447	24.3675	23.6551	23.6462	23.6198
DNA-Helicobacter-2019-04-24.one_line	2711601413	50	5	ATNCG_22233	129250	20.2507	23.1172	21.0553	23.6294	24.0998	23.9458	23.672
DNA-NCBI-Virus-Complete-Nucleotide-Human-2020-05-11.one_line	470877038	50	5	ATNCG_22233	56800	12.1567	10.2412	12.1021	13.1549	12.7342	11.6532	11.1479
DNA-Influenza-2019-04-27.one_line	1106180040	50	5	ATNCG_22233	12250	21.2816	21.9347	22.4327	24.302	26.302	24.4082	24.6857
DNA-Genome-Chondrus-crispus-GCA_000350225.2-2013-05-22.one_line	77592685	50	5	ATNCG_22233	3100	23.2258	24.6774	25.0968	27.0323	34.6774	31.2581	32.2581
DNA-Genome-Salpingoeca-rosetta-GCA_000188695.1-2011-02-10.one_line	37299580	50	5	ATNCG_22233	3050	22.8852	24.0656	24.6557	26.2623	34.7541	30.7213	31.7377
DNA-Mitochondrion-2019-03-15.one_line	241606731	50	5	ATNCG_22233	2800	23.1786	24.6786	25.2143	27.3571	34.7143	30.9286	31.7143
DNA-Genome-Spironucleus-salmonicida-GCA_000497125.1-2013-11-19.one_line	9934367	50	5	ATNCG_22233	1550	25.0323	25.3548	27.2258	29.0323	40.7097	34.0645	36.129
DNA-Genome-Fusarium-graminearum-PH-1-GCF_000240135.3-2008-11-21.one_line	34133023	50	5	ATNCG_22233	1200	26.3333	26.4167	28.6667	29.4167	46.25	36.25	39
DNA-Genome-Astrammina-rara-GCA_000211355.2-2011-04-27.one_line	1362918	50	5	ATNCG_22233	1200	31.0833	30.75	33.6667	34.1667	48.8333	40.1667	43
DNA-Genome-Cryptosporidium-parvum-Iowa-II-GCA_000165345.1-2007-02-26.one_line	7012512	50	5	ATNCG_22233	200	50	36	58	51	115	63.5	80
DNA-Genome-Strongylocentrotus-purpuratus-GCF_000002235.4-2015-03-10.one_line	659082267	100	5	ATNCG_22233	3821100	19.4651	22.1671	19.933	22.1291	22.0441	22.0091	21.9407
DNA-Helicobacter-2019-04-24.one_line	2711601413	100	5	ATNCG_22233	171300	18.7589	20.1243	19.3112	21.4127	21.0531	20.8628	20.6959
DNA-NCBI-Virus-Complete-Nucleotide-Human-2020-05-11.one_line	470877038	100	5	ATNCG_22233	134800	9.1224	7.1632	9.1484	9.7596	9.207	8.1795	8
DNA-Influenza-2019-04-27.one_line	1106180040	100	5	ATNCG_22233	22900	18.9039	18.0611	19.4323	21.0568	21	19.9825	20.0349
DNA-Mitochondrion-2019-03-15.one_line	241606731	100	5	ATNCG_22233	5800	20.8793	22.3621	22.1034	24.5172	29.931	26.6379	27.1034
DNA-Genome-Chondrus-crispus-GCA_000350225.2-2013-05-22.one_line	77592685	100	5	ATNCG_22233	5700	20.7719	22.4211	21.9298	23.9649	30.2807	27.1404	27.5789
DNA-Genome-Spironucleus-salmonicida-GCA_000497125.1-2013-11-19.one_line	9934367	100	5	ATNCG_22233	4400	22.4318	24.6136	24	25.7045	32.3636	29.6136	30.1818
DNA-Genome-Salpingoeca-rosetta-GCA_000188695.1-2011-02-10.one_line	37299580	100	5	ATNCG_22233	4300	20.9302	22.4186	22.3256	24.3488	30.9302	27.814	28.3721
DNA-Genome-Fusarium-graminearum-PH-1-GCF_000240135.3-2008-11-21.one_line	34133023	100	5	ATNCG_22233	2700	22.8519	23.6296	24.2963	25.7407	35.1111	30.3704	31.5556
DNA-Genome-Astrammina-rara-GCA_000211355.2-2011-04-27.one_line	1362918	100	5	ATNCG_22233	1500	29.2667	29.9333	31.3333	32.9333	44.8	37.8667	40
DNA-Genome-Cryptosporidium-parvum-Iowa-II-GCA_000165345.1-2007-02-26.one_line	7012512	100	5	ATNCG_22233	400	33	28.5	37.5	35.75	68	41.25	50
DNA-Genome-Strongylocentrotus-purpuratus-GCF_000002235.4-2015-03-10.one_line	659082267	125	5	ATNCG_22233	4828375	19.9099	22.54	20.3746	22.5428	22.2944	22.3299	22.2136
DNA-Helicobacter-2019-04-24.one_line	2711601413	125	5	ATNCG_22233	176500	18.6227	20.413	19.2374	21.5263	21.2924	21.1598	20.9564
DNA-NCBI-Virus-Complete-Nucleotide-Human-2020-05-11.one_line	470877038	125	5	ATNCG_22233	157000	8.5834	6.6694	8.6	9.1217	8.5166	7.6777	7.4522
DNA-Influenza-2019-04-27.one_line	1106180040	125	5	ATNCG_22233	30000	18.5433	17.58	19.0333	20.69	20.0467	19.09	19.0133
DNA-Genome-Chondrus-crispus-GCA_000350225.2-2013-05-22.one_line	77592685	125	5	ATNCG_22233	6375	20.5647	22.2588	21.7098	23.6549	28.2039	26.4627	26.5412
DNA-Genome-Salpingoeca-rosetta-GCA_000188695.1-2011-02-10.one_line	37299580	125	5	ATNCG_22233	6000	20.3	21.95	21.5	23.6	28.0333	26.2167	26.4
DNA-Mitochondrion-2019-03-15.one_line	241606731	125	5	ATNCG_22233	5875	20.3064	21.8553	21.6511	24.2723	29.1404	26.5702	26.6213
DNA-Genome-Spironucleus-salmonicida-GCA_000497125.1-2013-11-19.one_line	9934367	125	5	ATNCG_22233	3625	22.1793	23.6966	23.8345	25.931	35.7455	29.4345	29.6828
DNA-Genome-Fusarium-graminearum-PH-1-GCF_000240135.3-2008-11-21.one_line	34133023	125	5	ATNCG_22233	3125	21.792	22.496	23.232	24.64	33.44	29.184	29.696
DNA-Genome-Astrammina-rara-GCA_000211355.2-2011-04-27.one_line	1362918	125	5	ATNCG_22233	2250	27.3778	29.1556	29.6	31.7778	39.9111	35.3333	36.8
DNA-Genome-Cryptosporidium-parvum-Iowa-II-GCA_000165345.1-2007-02-26.one_line	7012512	125	5	ATNCG_22233	625	31.04	25.92	33.92	34.4	56.16	38.72	44.16
DNA-Genome-Strongylocentrotus-purpuratus-GCF_000002235.4-2015-03-10.one_line	659082267	150	5	ATNCG_22233	5261850	18.9861	21.4728	19.4267	21.5412	21.2863	21.4189	21.153
DNA-Helicobacter-2019-04-24.one_line	2711601413	150	5	ATNCG_22233	220800	18.1005	20.0213	18.6531	20.8777	20.6952	20.6975	20.4692
DNA-NCBI-Virus-Complete-Nucleotide-Human-2020-05-11.one_line	470877038	150	5	ATNCG_22233	177150	8.4527	6.6317	8.4877	8.9754	8.2032	7.4671	7.291
DNA-Influenza-2019-04-27.one_line	1106180040	150	5	ATNCG_22233	34050	17.8473	16.1175	18.091	19.6799	18.3818	17.7416	17.5154
DNA-Genome-Chondrus-crispus-GCA_000350225.2-2013-05-22.one_line	77592685	150	5	ATNCG_22233	9000	20.4	22.3667	21.4222	23.4111	26.9667	25.8	25.5556
DNA-Mitochondrion-2019-03-15.one_line	241606731	150	5	ATNCG_22233	7200	20.2083	21.7222	21.5833	23.8194	27.5972	25.8472	25.9444
DNA-Genome-Salpingoeca-rosetta-GCA_000188695.1-2011-02-10.one_line	37299580	150	5	ATNCG_22233	5400	20.8704	22.3333	22.0741	23.8519	29.2037	27.0741	27.037
DNA-Genome-Fusarium-graminearum-PH-1-GCF_000240135.3-2008-11-21.one_line	34133023	150	5	ATNCG_22233	4350	20.8506	21.931	22.1609	23.7931	31.0345	27.4483	27.4943
DNA-Genome-Astrammina-rara-GCA_000211355.2-2011-04-27.one_line	1362918	150	5	ATNCG_22233	3450	26.058	28.8116	27.942	30.058	36.6087	33.5652	34.5507
DNA-Genome-Spironucleus-salmonicida-GCA_000497125.1-2013-11-19.one_line	9934367	150	5	ATNCG_22233	2850	22.4211	23.0175	24.0702	26.0351	34.9259	29.3333	30.0351
DNA-Genome-Cryptosporidium-parvum-Iowa-II-GCA_000165345.1-2007-02-26.one_line	7012512	150	5	ATNCG_22233	450	34.4444	30.8889	38.2222	38.2222	68.2222	43.7778	51.5556
DNA-Genome-Strongylocentrotus-purpuratus-GCF_000002235.4-2015-03-10.one_line	659082267	250	5	ATNCG_22233	6655250	19.4141	21.532	19.7719	21.8148	21.1517	21.3374	21.1648
DNA-Helicobacter-2019-04-24.one_line	2711601413	250	5	ATNCG_22233	393750	17.9385	19.6734	18.4305	20.561	19.7793	20.0033	19.8634
DNA-NCBI-Virus-Complete-Nucleotide-Human-2020-05-11.one_line	470877038	250	5	ATNCG_22233	255000	7.4459	5.7137	7.5333	7.9039	6.9431	6.3824	6.2322
DNA-Influenza-2019-04-27.one_line	1106180040	250	5	ATNCG_22233	51000	16.702	13.8647	16.6941	18.2431	15.3647	14.9863	14.8706
DNA-Mitochondrion-2019-03-15.one_line	241606731	250	5	ATNCG_22233	15250	18.918	20.4459	19.882	21.9607	23.5607	23.0689	23.0295
DNA-Genome-Chondrus-crispus-GCA_000350225.2-2013-05-22.one_line	77592685	250	5	ATNCG_22233	14500	19.3172	21	20.1379	21.8828	24.0414	23.7586	23.5862
DNA-Genome-Fusarium-graminearum-PH-1-GCF_000240135.3-2008-11-21.one_line	34133023	250	5	ATNCG_22233	13000	19.2462	20.9692	20.2154	21.8615	24.8615	23.9077	23.8462
DNA-Genome-Salpingoeca-rosetta-GCA_000188695.1-2011-02-10.one_line	37299580	250	5	ATNCG_22233	8750	19.1657	20.9829	20.1371	21.8743	25.68	24.4	24.2286
DNA-Genome-Astrammina-rara-GCA_000211355.2-2011-04-27.one_line	1362918	250	5	ATNCG_22233	3750	26.1067	27.7333	27.7333	30.4533	36	33.0933	34.1333
DNA-Genome-Spironucleus-salmonicida-GCA_000497125.1-2013-11-19.one_line	9934367	250	5	ATNCG_22233	3000	21.3333	22	23.0667	24.5667	31.4571	28.8333	29.4667
DNA-Genome-Cryptosporidium-parvum-Iowa-II-GCA_000165345.1-2007-02-26.one_line	7012512	250	5	ATNCG_22233	1250	23.12	21.36	26.08	26.48	40.4	31.6	33.92
DNA-Genome-Strongylocentrotus-purpuratus-GCF_000002235.4-2015-03-10.one_line	659082267	500	5	ATNCG_22233	7223000	18.4936	20.3658	18.8527	20.705	19.834	20.1805	20.1033
DNA-Helicobacter-2019-04-24.one_line	2711601413	500	5	ATNCG_22233	772500	17.6436	18.9788	18.058	20.0368	18.7349	19.0126	18.9644
DNA-NCBI-Virus-Complete-Nucleotide-Human-2020-05-11.one_line	470877038	500	5	ATNCG_22233	239000	6.7611	4.9946	6.7414	7.1285	6.0134	5.6305	5.5431
DNA-Influenza-2019-04-27.one_line	1106180040	500	5	ATNCG_22233	85000	15.4329	11.8965	15.2306	16.6671	12.8341	12.66	12.56
DNA-Genome-Chondrus-crispus-GCA_000350225.2-2013-05-22.one_line	77592685	500	5	ATNCG_22233	36000	19.8972	21.9333	20.4778	22.1194	23.4028	23.3139	23.2
DNA-Mitochondrion-2019-03-15.one_line	241606731	500	5	ATNCG_22233	30500	19.1443	20.9803	19.8754	21.9311	22.6426	22.3934	22.2951
DNA-Genome-Fusarium-graminearum-PH-1-GCF_000240135.3-2008-11-21.one_line	34133023	500	5	ATNCG_22233	22500	19.9822	22.1244	20.6489	22.2356	24.1467	23.9511	23.8044
DNA-Genome-Salpingoeca-rosetta-GCA_000188695.1-2011-02-10.one_line	37299580	500	5	ATNCG_22233	14000	20.2571	22.4786	21.0143	22.6786	25.0857	24.6571	24.5429
DNA-Genome-Spironucleus-salmonicida-GCA_000497125.1-2013-11-19.one_line	9934367	500	5	ATNCG_22233	7000	19.3714	20.6286	20.4857	22.0143	26.2533	24.6571	24.5714
DNA-Genome-Cryptosporidium-parvum-Iowa-II-GCA_000165345.1-2007-02-26.one_line	7012512	500	5	ATNCG_22233	3500	21.4571	21.8857	22.9714	24.5143	31.2	27.6857	28.2286
DNA-Genome-Astrammina-rara-GCA_000211355.2-2011-04-27.one_line	1362918	500	5	ATNCG_22233	500	38.2	31.8	41.6	41.4	69	48.4	55.2
DNA-Genome-Strongylocentrotus-purpuratus-GCF_000002235.4-2015-03-10.one_line	659082267	750	5	ATNCG_22233	10496250	18.2465	19.921	18.568	20.3828	19.2739	19.6381	19.6069
DNA-Helicobacter-2019-04-24.one_line	2711601413	750	5	ATNCG_22233	1041750	17.6314	18.8922	18.0475	19.9933	18.4453	18.7399	18.7101
DNA-NCBI-Virus-Complete-Nucleotide-Human-2020-05-11.one_line	470877038	750	5	ATNCG_22233	171000	8.9193	6.5129	8.745	9.3713	7.5421	7.2474	7.0901
DNA-Influenza-2019-04-27.one_line	1106180040	750	5	ATNCG_22233	129750	14.7329	10.8748	14.6713	15.8744	11.5291	11.3827	11.3942
DNA-Mitochondrion-2019-03-15.one_line	241606731	750	5	ATNCG_22233	24000	18.4417	20.2958	19.3417	21.2917	22.4625	22.0292	22.0333
DNA-Genome-Fusarium-graminearum-PH-1-GCF_000240135.3-2008-11-21.one_line	34133023	750	5	ATNCG_22233	20250	18.8395	20.6568	19.6543	21.0074	22.9531	22.6519	22.6765
DNA-Genome-Chondrus-crispus-GCA_000350225.2-2013-05-22.one_line	77592685	750	5	ATNCG_22233	16500	19.2121	21.0061	20.0364	21.3758	23.697	23.0485	23.1273
DNA-Genome-Spironucleus-salmonicida-GCA_000497125.1-2013-11-19.one_line	9934367	750	5	ATNCG_22233	11250	19.2533	20.6933	19.8756	21.7422	24.0235	23.2089	23.0756
DNA-Genome-Salpingoeca-rosetta-GCA_000188695.1-2011-02-10.one_line	37299580	750	5	ATNCG_22233	3750	20.5867	21.7067	22.0267	23.28	29.6533	26.72	26.9867
DNA-Genome-Cryptosporidium-parvum-Iowa-II-GCA_000165345.1-2007-02-26.one_line	7012512	750	5	ATNCG_22233	2250	21.3333	20.8889	23.2889	24.1778	32.8889	27.9556	29.3333
DNA-Genome-Strongylocentrotus-purpuratus-GCF_000002235.4-2015-03-10.one_line	659082267	1000	5	ATNCG_22233	13779000	18.1608	19.6601	18.4295	20.2685	18.9641	19.363	19.3417
DNA-Helicobacter-2019-04-24.one_line	2711601413	1000	5	ATNCG_22233	1272000	17.5354	18.6563	17.9253	19.8064	18.1517	18.4906	18.4418
DNA-Influenza-2019-04-27.one_line	1106180040	1000	5	ATNCG_22233	153000	14.381	9.8386	14.1359	15.3922	10.249	10.1791	10.149
DNA-NCBI-Virus-Complete-Nucleotide-Human-2020-05-11.one_line	470877038	1000	5	ATNCG_22233	130000	10.3692	7.9654	9.9508	11.1415	8.9331	8.7185	8.6277
DNA-Mitochondrion-2019-03-15.one_line	241606731	1000	5	ATNCG_22233	23000	17.4304	18.8217	18.2174	19.9522	20.9391	20.7174	20.8348
DNA-Genome-Fusarium-graminearum-PH-1-GCF_000240135.3-2008-11-21.one_line	34133023	1000	5	ATNCG_22233	22000	19.0955	20.9682	19.8273	21.15	22.9955	22.8364	22.7818
DNA-Genome-Chondrus-crispus-GCA_000350225.2-2013-05-22.one_line	77592685	1000	5	ATNCG_22233	20000	18.335	19.225	18.96	20.14	21.515	21.11	21.16
DNA-Genome-Spironucleus-salmonicida-GCA_000497125.1-2013-11-19.one_line	9934367	1000	5	ATNCG_22233	16000	18.5688	20.4063	19.425	20.8688	23.0933	22.6688	22.6
DNA-Genome-Salpingoeca-rosetta-GCA_000188695.1-2011-02-10.one_line	37299580	1000	5	ATNCG_22233	3000	20.9	21.2333	22.2667	23.2667	30.3333	27.3667	28
DNA-Genome-Cryptosporidium-parvum-Iowa-II-GCA_000165345.1-2007-02-26.one_line	7012512	1000	5	ATNCG_22233	1000	22.2	19.5	25	24.5	40.8	29.9	33.2
DNA-Genome-Strongylocentrotus-purpuratus-GCF_000002235.4-2015-03-10.one_line	659082267	2500	5	ATNCG_22233	31120000	18.2002	19.3127	18.334	20.2411	18.4079	19.0474	19.0288
DNA-Helicobacter-2019-04-24.one_line	2711601413	2500	5	ATNCG_22233	1762500	17.4771	18.2812	17.7078	19.6401	17.6659	17.9783	17.9502
DNA-Influenza-2019-04-27.one_line	1106180040	2500	5	ATNCG_22233	250000	11.23	6.5956	10.8072	11.8344	6.832	6.8284	6.7568
DNA-Genome-Fusarium-graminearum-PH-1-GCF_000240135.3-2008-11-21.one_line	34133023	2500	5	ATNCG_22233	85000	18.7647	20.4753	19.2212	20.7176	21.1247	21.5588	21.4118
DNA-Genome-Spironucleus-salmonicida-GCA_000497125.1-2013-11-19.one_line	9934367	2500	5	ATNCG_22233	82500	18.783	20.1685	19.2582	20.8691	21.2718	21.4739	21.4158
DNA-NCBI-Virus-Complete-Nucleotide-Human-2020-05-11.one_line	470877038	2500	5	ATNCG_22233	80000	17.175	13.6988	16.5075	18.915	14.2875	14.3025	14.34
DNA-Mitochondrion-2019-03-15.one_line	241606731	2500	5	ATNCG_22233	65000	18.1969	20.3108	18.7754	20.7323	20.8492	21.0785	21.0277
DNA-Genome-Chondrus-crispus-GCA_000350225.2-2013-05-22.one_line	77592685	2500	5	ATNCG_22233	52500	18.5714	20.1105	18.9562	20.56	21.0133	21.2438	21.219
DNA-Genome-Cryptosporidium-parvum-Iowa-II-GCA_000165345.1-2007-02-26.one_line	7012512	2500	5	ATNCG_22233	2500	21.64	20.96	23.28	24.52	30.88	26.8	28.16
DNA-Genome-Strongylocentrotus-purpuratus-GCF_000002235.4-2015-03-10.one_line	659082267	5000	5	ATNCG_22233	48580000	18.2362	19.049	18.3043	20.2293	18.0021	18.8368	18.8158
DNA-Helicobacter-2019-04-24.one_line	2711601413	5000	5	ATNCG_22233	2050000	17.7832	18.628	18.0355	19.8509	17.9642	18.2636	18.2373
DNA-Influenza-2019-04-27.one_line	1106180040	5000	5	ATNCG_22233	190000	12.3689	6.9458	11.9389	13.0779	7.3526	7.3121	7.2674
DNA-Mitochondrion-2019-03-15.one_line	241606731	5000	5	ATNCG_22233	95000	17.6653	19.4916	18.2463	20.1705	20.1084	20.4905	20.3621
DNA-Genome-Fusarium-graminearum-PH-1-GCF_000240135.3-2008-11-21.one_line	34133023	5000	5	ATNCG_22233	95000	18.6611	20.1768	19.0442	20.5947	20.8032	21.1768	21.0611
DNA-Genome-Spironucleus-salmonicida-GCA_000497125.1-2013-11-19.one_line	9934367	5000	5	ATNCG_22233	75000	18.9987	20.6813	19.3707	21.12	21.3725	21.4387	21.4347
DNA-NCBI-Virus-Complete-Nucleotide-Human-2020-05-11.one_line	470877038	5000	5	ATNCG_22233	70000	18.0557	16.2186	18.1686	19.95	16.9429	17.0271	17.1029
DNA-Genome-Chondrus-crispus-GCA_000350225.2-2013-05-22.one_line	77592685	5000	5	ATNCG_22233	35000	17.7229	19.5714	18.1829	19.6257	20.7457	21.1	21.0514
DNA-Genome-Cryptosporidium-parvum-Iowa-II-GCA_000165345.1-2007-02-26.one_line	7012512	5000	5	ATNCG_22233	20000	17.915	19.095	18.72	20.575	21.275	21.28	21.32
DNA-Genome-Strongylocentrotus-purpuratus-GCF_000002235.4-2015-03-10.one_line	659082267	10000	5	ATNCG_22233	68530000	18.2783	18.9179	18.3212	20.2293	17.7207	18.689	18.6758
DNA-Helicobacter-2019-04-24.one_line	2711601413	10000	5	ATNCG_22233	2100000	18.1955	19.7589	18.5516	20.5395	18.9601	19.2534	19.2406
DNA-NCBI-Virus-Complete-Nucleotide-Human-2020-05-11.one_line	470877038	10000	5	ATNCG_22233	130000	16.2831	11.9954	16.0231	17.8415	12.2615	12.4592	12.4646
DNA-Mitochondrion-2019-03-15.one_line	241606731	10000	5	ATNCG_22233	110000	17.6336	19.4309	18.1691	20.1073	19.8855	20.3282	20.2145
DNA-Genome-Fusarium-graminearum-PH-1-GCF_000240135.3-2008-11-21.one_line	34133023	10000	5	ATNCG_22233	110000	18.2445	20.2909	18.5109	19.9482	20.4636	20.9955	20.9236
DNA-Genome-Chondrus-crispus-GCA_000350225.2-2013-05-22.one_line	77592685	10000	5	ATNCG_22233	60000	18.7283	20.775	19.08	20.6367	21.325	21.65	21.4667
DNA-Influenza-2019-04-27.one_line	1106180040	10000	5	ATNCG_22233	50000	16.176	12.038	15.548	17.76	12.938	13.06	13.032
DNA-Genome-Cryptosporidium-parvum-Iowa-II-GCA_000165345.1-2007-02-26.one_line	7012512	10000	5	ATNCG_22233	10000	18.38	19.8	19.38	21.04	23.32	22.73	23
DNA-Genome-Picea-abies-GCA_900067695.1-2016-11-09.one_line	11960690255	25	5	CAGTN_12344	10800	24.9537	25.3056	26.5926	28.9815	30.7778	30.0556	30.1111
DNA-Genome-Strongylocentrotus-purpuratus-GCF_000002235.4-2015-03-10.one_line	659082267	25	5	CAGTN_12344	5775	26.0433	25.316	28.2597	30.3377	34.4069	32.8312	33.1775
DNA-Helicobacter-2019-04-24.one_line	2711601413	25	5	CAGTN_12344	1475	27.661	26.1695	30.1017	31.7966	42.6441	35.661	37.9661
DNA-NCBI-Virus-Complete-Nucleotide-Human-2020-05-11.one_line	470877038	25	5	CAGTN_12344	600	35.1667	29.3333	39.6667	37.1667	63.3333	46	51.3333
DNA-Mitochondrion-2019-03-15.one_line	241606731	25	5	CAGTN_12344	575	34.7826	28.1739	39.3043	38.087	62.6087	44.5217	50.087
DNA-Influenza-2019-04-27.one_line	1106180040	25	5	CAGTN_12344	525	36.1905	28.5714	40.381	38.0952	65.1429	45.3333	51.8095
DNA-Genome-Chondrus-crispus-GCA_000350225.2-2013-05-22.one_line	77592685	25	5	CAGTN_12344	325	42.1538	30.1538	49.8462	47.3846	89.2308	57.2308	67.6923
DNA-Genome-Salpingoeca-rosetta-GCA_000188695.1-2011-02-10.one_line	37299580	25	5	CAGTN_12344	175	53.1429	35.4286	67.4286	57.7143	131.429	72	91.4286
DNA-Genome-Astrammina-rara-GCA_000211355.2-2011-04-27.one_line	1362918	25	5	CAGTN_12344	50	100	58	164	120	370	134	192
DNA-Genome-Picea-abies-GCA_900067695.1-2016-11-09.one_line	11960690255	50	5	CAGTN_12344	12300	24.2114	24.9593	25.561	27.878	28.7967	27.9268	28.1626
DNA-Genome-Strongylocentrotus-purpuratus-GCF_000002235.4-2015-03-10.one_line	659082267	50	5	CAGTN_12344	4350	26.5747	26.6897	28.7816	30.7586	35.931	33.5632	34.2989
DNA-Helicobacter-2019-04-24.one_line	2711601413	50	5	CAGTN_12344	1600	26.6875	24.9375	28.5	30.0625	39.3125	32.3125	34.5
DNA-NCBI-Virus-Complete-Nucleotide-Human-2020-05-11.one_line	470877038	50	5	CAGTN_12344	850	31.8824	28.5882	35.2941	35.7647	53.2941	41.0588	45.1765
DNA-Mitochondrion-2019-03-15.one_line	241606731	50	5	CAGTN_12344	700	34.1429	28.8571	38	37	59.8571	45	49.7143
DNA-Genome-Chondrus-crispus-GCA_000350225.2-2013-05-22.one_line	77592685	50	5	CAGTN_12344	400	38	29	44	42.75	77	51	59
DNA-Genome-Salpingoeca-rosetta-GCA_000188695.1-2011-02-10.one_line	37299580	50	5	CAGTN_12344	250	45.6	34.8	56	51.2	101.6	60	73.6
DNA-Influenza-2019-04-27.one_line	1106180040	50	5	CAGTN_12344	100	70	44	96	74	198	94	124
DNA-Genome-Picea-abies-GCA_900067695.1-2016-11-09.one_line	11960690255	100	5	CAGTN_12344	10200	23.9216	23.8529	25.0196	27.1275	27.6569	26.3725	26.902
DNA-Genome-Strongylocentrotus-purpuratus-GCF_000002235.4-2015-03-10.one_line	659082267	100	5	CAGTN_12344	3000	26.1667	25.8333	28.3333	30.5667	35.6333	32.4333	33.2
DNA-NCBI-Virus-Complete-Nucleotide-Human-2020-05-11.one_line	470877038	100	5	CAGTN_12344	2100	24.9524	22.4286	26.4762	28	34.7619	29.3333	30.8571
DNA-Helicobacter-2019-04-24.one_line	2711601413	100	5	CAGTN_12344	1200	28.9167	25.9167	31.3333	32.6667	44.6667	35.75	38.3333
DNA-Mitochondrion-2019-03-15.one_line	241606731	100	5	CAGTN_12344	1100	29.0909	24.8182	31.8182	32.4545	47.1818	36.5455	39.6364
DNA-Genome-Chondrus-crispus-GCA_000350225.2-2013-05-22.one_line	77592685	100	5	CAGTN_12344	300	41	29.3333	49.3333	46.3333	88.6667	54	65.3333
DNA-Genome-Salpingoeca-rosetta-GCA_000188695.1-2011-02-10.one_line	37299580	100	5	CAGTN_12344	100	70	45	96	74	199	95	124
DNA-Genome-Picea-abies-GCA_900067695.1-2016-11-09.one_line	11960690255	125	5	CAGTN_12344	8125	24.4431	24.32	25.6246	27.8031	29.12	27.4092	27.7662
DNA-Genome-Strongylocentrotus-purpuratus-GCF_000002235.4-2015-03-10.one_line	659082267	125	5	CAGTN_12344	2625	27.1238	26.8571	28.9524	30.9714	37.6762	33.6381	35.0476
DNA-NCBI-Virus-Complete-Nucleotide-Human-2020-05-11.one_line	470877038	125	5	CAGTN_12344	1625	24	20.4308	25.2308	25.9077	35.6923	27.8769	29.7846
DNA-Mitochondrion-2019-03-15.one_line	241606731	125	5	CAGTN_12344	1250	28.64	26.48	31.52	32.72	45.52	37.12	40
DNA-Helicobacter-2019-04-24.one_line	2711601413	125	5	CAGTN_12344	1125	29.0667	27.9111	31.8222	33.5111	47.1111	37.7778	40.8889
DNA-Genome-Chondrus-crispus-GCA_000350225.2-2013-05-22.one_line	77592685	125	5	CAGTN_12344	875	30.7429	27.7714	33.6	34.8571	51.4286	39.6571	43.4286
DNA-Genome-Picea-abies-GCA_900067695.1-2016-11-09.one_line	11960690255	150	5	CAGTN_12344	5400	25.0741	24.4259	26.3333	28.6296	30.2963	28.3519	28.8148
DNA-Genome-Strongylocentrotus-purpuratus-GCF_000002235.4-2015-03-10.one_line	659082267	150	5	CAGTN_12344	2400	26.9167	26.0833	28.9167	30.8333	37.5	33.4583	34.5
DNA-NCBI-Virus-Complete-Nucleotide-Human-2020-05-11.one_line	470877038	150	5	CAGTN_12344	2250	22.0444	18	22.7556	24.2222	29.6889	23.6444	25.2444
DNA-Helicobacter-2019-04-24.one_line	2711601413	150	5	CAGTN_12344	1350	27.1852	25.7037	29.4815	31.1852	42.2963	34.1481	36.7407
DNA-Mitochondrion-2019-03-15.one_line	241606731	150	5	CAGTN_12344	750	29.4667	24	32.2667	32.4	52.6667	37.0667	41.6
DNA-Genome-Chondrus-crispus-GCA_000350225.2-2013-05-22.one_line	77592685	150	5	CAGTN_12344	750	31.8667	29.2	35.4667	36.1333	56	42	46.4
DNA-Genome-Salpingoeca-rosetta-GCA_000188695.1-2011-02-10.one_line	37299580	150	5	CAGTN_12344	150	49.3333	36.6667	62.6667	54	119.333	50.6667	72
DNA-Genome-Picea-abies-GCA_900067695.1-2016-11-09.one_line	11960690255	250	5	CAGTN_12344	3750	25.4933	24.08	26.6667	28.4	31.7333	28.5867	29.44
DNA-NCBI-Virus-Complete-Nucleotide-Human-2020-05-11.one_line	470877038	250	5	CAGTN_12344	2000	23.2	17.95	24	25.25	29.35	23.45	25.2
DNA-Genome-Chondrus-crispus-GCA_000350225.2-2013-05-22.one_line	77592685	250	5	CAGTN_12344	1250	27.36	26	30.08	32.24	44.48	36.08	38.72
DNA-Genome-Strongylocentrotus-purpuratus-GCF_000002235.4-2015-03-10.one_line	659082267	250	5	CAGTN_12344	1000	28.5	25.6	30.4	31.5	44.9	34.5	38
DNA-Helicobacter-2019-04-24.one_line	2711601413	250	5	CAGTN_12344	750	31.2	28.1333	34.4	36	54.8	40.2667	44.8
DNA-Mitochondrion-2019-03-15.one_line	241606731	250	5	CAGTN_12344	750	31.6	27.3333	34.9333	35.6	56	42.1333	46.4
DNA-NCBI-Virus-Complete-Nucleotide-Human-2020-05-11.one_line	470877038	500	5	CAGTN_12344	3000	23.5667	19.1333	24.5333	26.2667	28.1	24.6	25.7333
DNA-Genome-Strongylocentrotus-purpuratus-GCF_000002235.4-2015-03-10.one_line	659082267	500	5	CAGTN_12344	1000	29.7	28.4	32.2	33.5	49.4	39.1	42.4
DNA-Mitochondrion-2019-03-15.one_line	241606731	500	5	CAGTN_12344	1000	29.6	27.6	33	34.3	50.4	40.3	43.2
DNA-Genome-Chondrus-crispus-GCA_000350225.2-2013-05-22.one_line	77592685	500	5	CAGTN_12344	1000	28.7	26.2	31.6	32.9	49.9	38.7	42.4
DNA-Genome-Picea-abies-GCA_900067695.1-2016-11-09.one_line	11960690255	500	5	CAGTN_12344	500	35.6	24.4	38	37.4	59.8	39	45.6
DNA-Helicobacter-2019-04-24.one_line	2711601413	500	5	CAGTN_12344	500	32.2	20	33.6	34.4	55.8	34	40.8
DNA-Genome-Salpingoeca-rosetta-GCA_000188695.1-2011-02-10.one_line	37299580	500	5	CAGTN_12344	500	36.2	30.8	39.6	37.8	65.8	45	52
DNA-NCBI-Virus-Complete-Nucleotide-Human-2020-05-11.one_line	470877038	750	5	CAGTN_12344	3000	23.5333	18.1	24.6667	26.3	27.5333	23.7333	25.2
DNA-Genome-Chondrus-crispus-GCA_000350225.2-2013-05-22.one_line	77592685	750	5	CAGTN_12344	2250	26.2222	26.4444	28.1778	29.6444	38.7111	34.0889	35.3778
DNA-Helicobacter-2019-04-24.one_line	2711601413	750	5	CAGTN_12344	750	30.1333	24.1333	30.1333	32.1333	48.6667	34.1333	38.4
DNA-Genome-Strongylocentrotus-purpuratus-GCF_000002235.4-2015-03-10.one_line	659082267	750	5	CAGTN_12344	750	32.2667	28.1333	35.4667	34.4	57.2	43.3333	48
DNA-Mitochondrion-2019-03-15.one_line	241606731	750	5	CAGTN_12344	750	31.0667	27.0667	35.2	36.1333	56.4	42.6667	46.9333
DNA-NCBI-Virus-Complete-Nucleotide-Human-2020-05-11.one_line	470877038	1000	5	CAGTN_12344	3000	24.0333	17.8333	24.6667	26.5667	26.7667	23.1	24.4
DNA-Genome-Strongylocentrotus-purpuratus-GCF_000002235.4-2015-03-10.one_line	659082267	1000	5	CAGTN_12344	2000	25.45	24.35	26.5	28.05	36.05	30.95	32.6
DNA-Genome-Chondrus-crispus-GCA_000350225.2-2013-05-22.one_line	77592685	1000	5	CAGTN_12344	2000	25.1	20.9	26.1	27.85	34.15	28.65	30.2
DNA-Helicobacter-2019-04-24.one_line	2711601413	1000	5	CAGTN_12344	1000	26.8	17.1	25.4	28.1	36.8	25.9	29.2
DNA-Genome-Chondrus-crispus-GCA_000350225.2-2013-05-22.one_line	77592685	2500	5	CAGTN_12344	5000	24.46	25.92	25.8	27.7	32.94	30.94	31.28
DNA-Genome-Picea-abies-GCA_900067695.1-2016-11-09.one_line	11960690255	25	5	CANTG_12344	5475	23.3425	26.0274	25.3516	27.9269	31.3607	29.589	30.1005
DNA-Genome-Strongylocentrotus-purpuratus-GCF_000002235.4-2015-03-10.one_line	659082267	25	5	CANTG_12344	3475	24.259	25.7266	26.705	29.295	34.1871	31.1367	32.1151
DNA-Helicobacter-2019-04-24.one_line	2711601413	25	5	CANTG_12344	725	29.1034	28	32.2759	33.2414	51.1724	36.8276	41.3793
DNA-Mitochondrion-2019-03-15.one_line	241606731	25	5	CANTG_12344	225	43.5556	28	50.6667	43.5556	96	48	62.2222
DNA-Genome-Chondrus-crispus-GCA_000350225.2-2013-05-22.one_line	77592685	25	5	CANTG_12344	175	49.7143	34.2857	64	56.5714	122.857	63.4286	82.2857
DNA-NCBI-Virus-Complete-Nucleotide-Human-2020-05-11.one_line	470877038	25	5	CANTG_12344	100	70	44	94	79	196	92	120
DNA-Influenza-2019-04-27.one_line	1106180040	25	5	CANTG_12344	75	80	49.3333	112	92	242.667	104	144
DNA-Genome-Salpingoeca-rosetta-GCA_000188695.1-2011-02-10.one_line	37299580	25	5	CANTG_12344	75	80	48	114.667	90.6667	244	105.333	144
DNA-Genome-Spironucleus-salmonicida-GCA_000497125.1-2013-11-19.one_line	9934367	25	5	CANTG_12344	25	160	96	284	208	640	208	336
DNA-Genome-Astrammina-rara-GCA_000211355.2-2011-04-27.one_line	1362918	25	5	CANTG_12344	25	156	96	284	192	640	204	320
DNA-Genome-Picea-abies-GCA_900067695.1-2016-11-09.one_line	11960690255	50	5	CANTG_12344	4100	21.7073	23.561	23.5122	25.7073	29.9756	27.3902	28.2927
DNA-Genome-Strongylocentrotus-purpuratus-GCF_000002235.4-2015-03-10.one_line	659082267	50	5	CANTG_12344	2100	24.619	24.5714	27.1429	29.381	36.1429	31.2857	32.7619
DNA-Helicobacter-2019-04-24.one_line	2711601413	50	5	CANTG_12344	850	26.9412	24.5882	29.1765	30.4706	46.9412	34.1176	38.1176
DNA-Genome-Chondrus-crispus-GCA_000350225.2-2013-05-22.one_line	77592685	50	5	CANTG_12344	300	38.6667	32.3333	46	44.3333	86.6667	52	62.6667
DNA-NCBI-Virus-Complete-Nucleotide-Human-2020-05-11.one_line	470877038	50	5	CANTG_12344	150	52	38	65.3333	53.3333	131.333	62	85.3333
DNA-Mitochondrion-2019-03-15.one_line	241606731	50	5	CANTG_12344	150	49.3333	28	60	50.6667	121.333	50	72
DNA-Genome-Salpingoeca-rosetta-GCA_000188695.1-2011-02-10.one_line	37299580	50	5	CANTG_12344	50	100	62	152	112	370	114	176
DNA-Helicobacter-2019-04-24.one_line	2711601413	100	5	CANTG_12344	2800	16.8929	15.4643	17.6429	19.3214	26.9286	19.7857	20.8571
DNA-Genome-Strongylocentrotus-purpuratus-GCF_000002235.4-2015-03-10.one_line	659082267	100	5	CANTG_12344	1500	24.8	23.1333	27.0667	29	39.2	32.0667	34.1333
DNA-Genome-Picea-abies-GCA_900067695.1-2016-11-09.one_line	11960690255	100	5	CANTG_12344	500	22.4	17.8	25.6	23	53.6	27.8	33.6
DNA-Mitochondrion-2019-03-15.one_line	241606731	100	5	CANTG_12344	200	34.5	14	40	29	89	30.5	46
DNA-Genome-Chondrus-crispus-GCA_000350225.2-2013-05-22.one_line	77592685	100	5	CANTG_12344	200	44.5	34	56	49.5	110	57.5	74
DNA-NCBI-Virus-Complete-Nucleotide-Human-2020-05-11.one_line	470877038	100	5	CANTG_12344	100	55	33	80	59	163	59	88
DNA-Genome-Strongylocentrotus-purpuratus-GCF_000002235.4-2015-03-10.one_line	659082267	125	5	CANTG_12344	2000	23.3	22.95	25.5	27.85	35.6	29.8	31.4
DNA-Helicobacter-2019-04-24.one_line	2711601413	125	5	CANTG_12344	1375	20.3636	16.4364	20.9455	22.6909	33.7455	23.2	25.6
DNA-Mitochondrion-2019-03-15.one_line	241606731	125	5	CANTG_12344	250	38.8	20.8	44	39.2	83.6	40.8	54.4
DNA-Genome-Chondrus-crispus-GCA_000350225.2-2013-05-22.one_line	77592685	125	5	CANTG_12344	250	39.6	29.2	46.4	43.2	93.2	50	64
DNA-Genome-Picea-abies-GCA_900067695.1-2016-11-09.one_line	11960690255	125	5	CANTG_12344	125	49.6	25.6	64	49.6	140.8	53.6	76.8
DNA-Genome-Salpingoeca-rosetta-GCA_000188695.1-2011-02-10.one_line	37299580	125	5	CANTG_12344	125	58.4	47.2	75.2	59.2	150.4	67.2	89.6
DNA-Genome-Strongylocentrotus-purpuratus-GCF_000002235.4-2015-03-10.one_line	659082267	150	5	CANTG_12344	3000	21.2	21.1333	22.6667	24.5333	30.0333	26.3333	27.4667
DNA-Helicobacter-2019-04-24.one_line	2711601413	150	5	CANTG_12344	750	24.9333	18.6667	25.8667	27.0667	42	26.9333	30.9333
DNA-Mitochondrion-2019-03-15.one_line	241606731	150	5	CANTG_12344	300	34.3333	21.3333	39.3333	35.3333	76	35.3333	46.6667
DNA-Genome-Chondrus-crispus-GCA_000350225.2-2013-05-22.one_line	77592685	150	5	CANTG_12344	300	38	27.6667	44	43.6667	82	47.3333	58.6667
DNA-Helicobacter-2019-04-24.one_line	2711601413	250	5	CANTG_12344	500	30	23.2	33.2	33.2	58.2	36.6	43.2
DNA-Genome-Strongylocentrotus-purpuratus-GCF_000002235.4-2015-03-10.one_line	659082267	250	5	CANTG_12344	250	35.6	30	43.2	35.6	81.2	39.6	52.8
DNA-Genome-Chondrus-crispus-GCA_000350225.2-2013-05-22.one_line	77592685	250	5	CANTG_12344	250	40	29.6	48	44.4	90.4	48.8	62.4
DNA-Genome-Strongylocentrotus-purpuratus-GCF_000002235.4-2015-03-10.one_line	659082267	500	5	CANTG_12344	500	27.2	23.6	30.8	28.4	53.6	31.4	38.4
DNA-Genome-Strongylocentrotus-purpuratus-GCF_000002235.4-2015-03-10.one_line	659082267	1000	5	CANTG_12344	1000	19.3	18.1	21.6	20.9	34.4	23.6	26.8
DNA-Genome-Picea-abies-GCA_900067695.1-2016-11-09.one_line	11960690255	25	5	CATGN_12344	26475	24.5401	25.5109	25.8659	28.5212	29.1256	28.7781	28.8574
DNA-Genome-Strongylocentrotus-purpuratus-GCF_000002235.4-2015-03-10.one_line	659082267	25	5	CATGN_12344	9950	25.3467	25.1759	27.1759	29.8995	32.0101	31.2663	31.3166
DNA-Helicobacter-2019-04-24.one_line	2711601413	25	5	CATGN_12344	1900	24.8421	24.6316	26.6316	28	36.7368	31.2632	33.0526
DNA-Mitochondrion-2019-03-15.one_line	241606731	25	5	CATGN_12344	1575	28.6349	25.7778	31.3651	32.8889	44.0635	37.3968	39.619
DNA-Influenza-2019-04-27.one_line	1106180040	25	5	CATGN_12344	600	35	28.5	39	36.8333	61.1667	43.6667	49.3333
DNA-NCBI-Virus-Complete-Nucleotide-Human-2020-05-11.one_line	470877038	25	5	CATGN_12344	425	39.0588	30.8235	45.1765	42.1176	77.6471	53.1765	61.1765
DNA-Genome-Salpingoeca-rosetta-GCA_000188695.1-2011-02-10.one_line	37299580	25	5	CATGN_12344	250	46	32.4	55.2	48.4	102.4	60.8	73.6
DNA-Genome-Astrammina-rara-GCA_000211355.2-2011-04-27.one_line	1362918	25	5	CATGN_12344	125	62.4	39.2	83.2	67.2	162.4	79.2	102.4
DNA-Genome-Chondrus-crispus-GCA_000350225.2-2013-05-22.one_line	77592685	25	5	CATGN_12344	100	69	43	96	77	201	97	128
DNA-Genome-Fusarium-graminearum-PH-1-GCF_000240135.3-2008-11-21.one_line	34133023	25	5	CATGN_12344	25	160	96	284	204	640	220	336
DNA-Genome-Picea-abies-GCA_900067695.1-2016-11-09.one_line	11960690255	50	5	CATGN_12344	42800	23.486	24.6776	24.528	27.3341	26.7687	26.5	26.5794
DNA-Genome-Strongylocentrotus-purpuratus-GCF_000002235.4-2015-03-10.one_line	659082267	50	5	CATGN_12344	12150	24.8395	25.5309	26.4856	29.0453	30.8066	30.1481	30.2551
DNA-Mitochondrion-2019-03-15.one_line	241606731	50	5	CATGN_12344	4150	25.9036	25.0361	28.0482	29.9759	34.1687	31.4699	32.3855
DNA-Helicobacter-2019-04-24.one_line	2711601413	50	5	CATGN_12344	2950	23.2881	22.5085	24.7458	26.9492	31.7627	27.7966	28.8814
DNA-NCBI-Virus-Complete-Nucleotide-Human-2020-05-11.one_line	470877038	50	5	CATGN_12344	550	34.5455	27.6364	37.8182	37.4545	62	42.5455	48.7273
DNA-Genome-Chondrus-crispus-GCA_000350225.2-2013-05-22.one_line	77592685	50	5	CATGN_12344	550	34.9091	31.0909	38.9091	38.5455	65.6364	46.5455	53.0909
DNA-Genome-Salpingoeca-rosetta-GCA_000188695.1-2011-02-10.one_line	37299580	50	5	CATGN_12344	300	43.3333	35	50	46.3333	90.6667	56	66.6667
DNA-Genome-Astrammina-rara-GCA_000211355.2-2011-04-27.one_line	1362918	50	5	CATGN_12344	250	46	32.8	56	47.2	104.4	62.8	76.8
DNA-Genome-Spironucleus-salmonicida-GCA_000497125.1-2013-11-19.one_line	9934367	50	5	CATGN_12344	100	69	44	94	78	190	86	116
DNA-Genome-WS1-bacterium-JGI-0000059-K21-GCA_000398605.1-2013-05-16.one_line	509551	50	5	CATGN_12344	50	102	62	160	120	370	138	192
DNA-Genome-Picea-abies-GCA_900067695.1-2016-11-09.one_line	11960690255	100	5	CATGN_12344	51700	22.9981	22.8569	23.706	26.2244	24.5899	24.1315	24.2631
DNA-Genome-Strongylocentrotus-purpuratus-GCF_000002235.4-2015-03-10.one_line	659082267	100	5	CATGN_12344	10800	24.4167	25.2778	25.9259	28.4352	30.1759	29.3519	29.4444
DNA-Mitochondrion-2019-03-15.one_line	241606731	100	5	CATGN_12344	5200	25.0385	23.8462	26.6923	28.6923	31.3269	29.2885	29.7692
DNA-Helicobacter-2019-04-24.one_line	2711601413	100	5	CATGN_12344	3100	24.6129	23.0645	25.6774	28.4194	32.3548	28.2581	29.2903
DNA-Genome-Chondrus-crispus-GCA_000350225.2-2013-05-22.one_line	77592685	100	5	CATGN_12344	900	30.4444	28.6667	33.7778	35.1111	52.1111	40.4444	44.4444
DNA-NCBI-Virus-Complete-Nucleotide-Human-2020-05-11.one_line	470877038	100	5	CATGN_12344	600	31.8333	25.1667	35	33.8333	54.3333	36.8333	42.6667
DNA-Genome-Salpingoeca-rosetta-GCA_000188695.1-2011-02-10.one_line	37299580	100	5	CATGN_12344	400	38.25	34	43	40.5	76	50.25	58
DNA-Genome-Astrammina-rara-GCA_000211355.2-2011-04-27.one_line	1362918	100	5	CATGN_12344	300	42.3333	30.6667	50	45.6667	87	52.6667	64
DNA-Genome-Picea-abies-GCA_900067695.1-2016-11-09.one_line	11960690255	125	5	CATGN_12344	43500	22.9034	22.6897	23.6506	25.9793	24.5678	23.9954	24.1287
DNA-Genome-Strongylocentrotus-purpuratus-GCF_000002235.4-2015-03-10.one_line	659082267	125	5	CATGN_12344	8375	23.9045	24.7164	25.3134	28.0597	29.6836	28.5612	28.8478
DNA-Mitochondrion-2019-03-15.one_line	241606731	125	5	CATGN_12344	6625	24.7698	24.3472	26.3245	28.2717	30.3396	28.6189	29.1623
DNA-Helicobacter-2019-04-24.one_line	2711601413	125	5	CATGN_12344	2000	25.6	25.75	27.6	30.55	38.6	32.8	34.6
DNA-Genome-Chondrus-crispus-GCA_000350225.2-2013-05-22.one_line	77592685	125	5	CATGN_12344	1000	29	26.9	32	33.9	49.5	39.1	42.4
DNA-NCBI-Virus-Complete-Nucleotide-Human-2020-05-11.one_line	470877038	125	5	CATGN_12344	875	28.9143	24.1143	31.3143	32.3429	46.9714	34.5143	38.4
DNA-Genome-Salpingoeca-rosetta-GCA_000188695.1-2011-02-10.one_line	37299580	125	5	CATGN_12344	250	46.4	36.4	54.4	49.2	102.4	60.8	73.6
DNA-Genome-Fusarium-graminearum-PH-1-GCF_000240135.3-2008-11-21.one_line	34133023	125	5	CATGN_12344	125	60.8	44	78.4	64	157.6	74.4	99.2
DNA-Genome-Astrammina-rara-GCA_000211355.2-2011-04-27.one_line	1362918	125	5	CATGN_12344	125	60.8	45.6	78.4	59.2	161.6	78.4	102.4
DNA-Genome-Picea-abies-GCA_900067695.1-2016-11-09.one_line	11960690255	150	5	CATGN_12344	42000	23.069	22.8476	23.7714	26.1429	24.6643	24.2143	24.3524
DNA-Genome-Strongylocentrotus-purpuratus-GCF_000002235.4-2015-03-10.one_line	659082267	150	5	CATGN_12344	8700	23.5287	23.9885	24.8966	27.4598	29.0115	27.6897	28.092
DNA-Mitochondrion-2019-03-15.one_line	241606731	150	5	CATGN_12344	7050	24.3972	23.5177	25.7305	27.7305	29.5461	27.6028	28.0851
DNA-Helicobacter-2019-04-24.one_line	2711601413	150	5	CATGN_12344	2250	24.4444	22.4444	25.7778	28.2667	33.0667	27.9556	29.1556
DNA-Genome-Chondrus-crispus-GCA_000350225.2-2013-05-22.one_line	77592685	150	5	CATGN_12344	1050	29.8095	28.2857	32.5714	33.9048	49.8095	39.9048	43.0476
DNA-NCBI-Virus-Complete-Nucleotide-Human-2020-05-11.one_line	470877038	150	5	CATGN_12344	900	26.5556	20.7778	27.7778	28.1111	43.6667	29.3333	32.8889
DNA-Genome-Astrammina-rara-GCA_000211355.2-2011-04-27.one_line	1362918	150	5	CATGN_12344	300	43	32	50.6667	46	94.3333	59.6667	70.6667
DNA-Genome-Salpingoeca-rosetta-GCA_000188695.1-2011-02-10.one_line	37299580	150	5	CATGN_12344	150	56	44.6667	70.6667	58.6667	140.667	71.3333	93.3333
DNA-Genome-Picea-abies-GCA_900067695.1-2016-11-09.one_line	11960690255	250	5	CATGN_12344	28250	23.469	23.5292	24.2478	26.5451	25.6743	25.0159	25.246
DNA-Genome-Strongylocentrotus-purpuratus-GCF_000002235.4-2015-03-10.one_line	659082267	250	5	CATGN_12344	11750	22.5277	23.1064	23.5915	26.1702	27.2085	26.1106	26.3489
DNA-Mitochondrion-2019-03-15.one_line	241606731	250	5	CATGN_12344	9750	23.8667	22.7077	24.7179	27.0872	27.4256	26.0513	26.5026
DNA-NCBI-Virus-Complete-Nucleotide-Human-2020-05-11.one_line	470877038	250	5	CATGN_12344	1250	20	12.72	19.68	19.76	28.56	18.64	21.44
DNA-Genome-Chondrus-crispus-GCA_000350225.2-2013-05-22.one_line	77592685	250	5	CATGN_12344	1250	28.48	27.76	31.04	32.56	46.08	38	40.32
DNA-Helicobacter-2019-04-24.one_line	2711601413	250	5	CATGN_12344	750	32.5333	29.3333	35.4667	36.6667	55.6	41.7333	46.4
DNA-Genome-Fusarium-graminearum-PH-1-GCF_000240135.3-2008-11-21.one_line	34133023	250	5	CATGN_12344	250	45.2	32	52.8	49.6	99.6	58	72
DNA-Mitochondrion-2019-03-15.one_line	241606731	500	5	CATGN_12344	18000	23.4722	22.7778	24.3222	26.5056	25.2389	24.2056	24.7333
DNA-Genome-Strongylocentrotus-purpuratus-GCF_000002235.4-2015-03-10.one_line	659082267	500	5	CATGN_12344	15000	22.44	23.12	23.32	25.5467	26.4933	25.6067	25.8133
DNA-Genome-Picea-abies-GCA_900067695.1-2016-11-09.one_line	11960690255	500	5	CATGN_12344	8500	24.0824	24.1882	25.1765	27.5765	28.1882	26.6941	27.2471
DNA-NCBI-Virus-Complete-Nucleotide-Human-2020-05-11.one_line	470877038	500	5	CATGN_12344	2500	20.36	13.52	19.36	21.36	23.64	18	19.36
DNA-Helicobacter-2019-04-24.one_line	2711601413	500	5	CATGN_12344	1500	22.6667	20.1333	23.8667	26.2667	33.8667	25.8	28
DNA-Genome-Chondrus-crispus-GCA_000350225.2-2013-05-22.one_line	77592685	500	5	CATGN_12344	500	35.6	27.4	40	38.4	67	46.2	52.8
DNA-Mitochondrion-2019-03-15.one_line	241606731	750	5	CATGN_12344	24750	23.3091	22.3394	24.0485	26.2747	24.3434	22.9333	23.9677
DNA-Genome-Strongylocentrotus-purpuratus-GCF_000002235.4-2015-03-10.one_line	659082267	750	5	CATGN_12344	14250	22.4702	23.0877	23.214	25.3684	26.1825	25.5789	25.6
DNA-NCBI-Virus-Complete-Nucleotide-Human-2020-05-11.one_line	470877038	750	5	CATGN_12344	3750	15.04	8.72	13.12	16.2133	15.3867	11.7867	12.5867
DNA-Genome-Picea-abies-GCA_900067695.1-2016-11-09.one_line	11960690255	750	5	CATGN_12344	1500	26.9333	25.8667	28.9333	30.3333	39.8	32.8	35.2
DNA-Helicobacter-2019-04-24.one_line	2711601413	750	5	CATGN_12344	1500	24.7333	22.3333	26.6667	28.4667	37.3333	29.2667	31.4667
DNA-Genome-Chondrus-crispus-GCA_000350225.2-2013-05-22.one_line	77592685	750	5	CATGN_12344	750	31.7333	28.1333	35.7333	36.1333	57.6	43.7333	48
DNA-Mitochondrion-2019-03-15.one_line	241606731	1000	5	CATGN_12344	24000	23.4667	21.7208	24.1833	26.4375	24.1958	23.2625	23.8
DNA-Genome-Strongylocentrotus-purpuratus-GCF_000002235.4-2015-03-10.one_line	659082267	1000	5	CATGN_12344	10000	20.64	20.27	21.36	23.04	24	22.63	22.84
DNA-Genome-Picea-abies-GCA_900067695.1-2016-11-09.one_line	11960690255	1000	5	CATGN_12344	2000	25.95	25.95	28.1	29.75	37.9	32.5	34.2
DNA-Helicobacter-2019-04-24.one_line	2711601413	1000	5	CATGN_12344	2000	20.6	20.65	22.4	24.45	32.15	26.3	27.8
DNA-Genome-Chondrus-crispus-GCA_000350225.2-2013-05-22.one_line	77592685	1000	5	CATGN_12344	2000	25.85	25.85	27.6	28.95	39.2	33.75	35
DNA-NCBI-Virus-Complete-Nucleotide-Human-2020-05-11.one_line	470877038	1000	5	CATGN_12344	1000	29.6	28.2	32.4	33.7	49.9	39.1	42.4
DNA-Mitochondrion-2019-03-15.one_line	241606731	2500	5	CATGN_12344	20000	22.985	19.08	23.53	25.65	21.295	20.35	20.98
DNA-Genome-Strongylocentrotus-purpuratus-GCF_000002235.4-2015-03-10.one_line	659082267	2500	5	CATGN_12344	7500	20.2933	20.9733	21.12	23.0267	25.1733	23.6667	23.8933
DNA-Genome-Chondrus-crispus-GCA_000350225.2-2013-05-22.one_line	77592685	2500	5	CATGN_12344	7500	23.5733	25.04	24.8	26.6667	30.08	28.8533	29.0667
DNA-Mitochondrion-2019-03-15.one_line	241606731	5000	5	CATGN_12344	10000	24.08	24.01	25.16	27.17	27.51	26.08	26.8
DNA-Genome-Picea-abies-GCA_900067695.1-2016-11-09.one_line	11960690255	25	5	CATGN_13333	18500	23.3568	26.0649	24.6595	27.2811	28.5676	28.0919	28.1946
DNA-Genome-Strongylocentrotus-purpuratus-GCF_000002235.4-2015-03-10.one_line	659082267	25	5	CATGN_13333	11125	24.3326	26.5708	26.0674	28.2787	30.8225	30.0225	30.1663
DNA-Helicobacter-2019-04-24.one_line	2711601413	25	5	CATGN_13333	1450	24.4828	24.6207	26.2069	26.8966	38.2759	31.1724	33.3793
DNA-Genome-Chondrus-crispus-GCA_000350225.2-2013-05-22.one_line	77592685	25	5	CATGN_13333	800	31.75	29.875	35.25	35.625	55	42	46
DNA-Genome-Salpingoeca-rosetta-GCA_000188695.1-2011-02-10.one_line	37299580	25	5	CATGN_13333	650	34	30.6154	38.1538	36.9231	60.7692	44.4615	49.8462
DNA-Mitochondrion-2019-03-15.one_line	241606731	25	5	CATGN_13333	525	36	27.0476	40	38.8571	66.4762	46.2857	53.3333
DNA-NCBI-Virus-Complete-Nucleotide-Human-2020-05-11.one_line	470877038	25	5	CATGN_13333	325	42.4615	33.2308	48.6154	45.2308	84.6154	52.6154	62.7692
DNA-Influenza-2019-04-27.one_line	1106180040	25	5	CATGN_13333	150	59.3333	38.6667	73.3333	59.3333	142.667	73.3333	96
DNA-Genome-Fusarium-graminearum-PH-1-GCF_000240135.3-2008-11-21.one_line	34133023	25	5	CATGN_13333	75	81.3333	52	117.333	94.6667	242.667	104	144
DNA-Genome-Spironucleus-salmonicida-GCA_000497125.1-2013-11-19.one_line	9934367	25	5	CATGN_13333	50	104	60	164	122	370	146	200
DNA-Genome-Astrammina-rara-GCA_000211355.2-2011-04-27.one_line	1362918	25	5	CATGN_13333	25	160	96	284	204	640	216	336
DNA-Genome-Picea-abies-GCA_900067695.1-2016-11-09.one_line	11960690255	50	5	CATGN_13333	21700	21.5806	24.2995	22.6452	25	25.9816	25.4977	25.6406
DNA-Genome-Strongylocentrotus-purpuratus-GCF_000002235.4-2015-03-10.one_line	659082267	50	5	CATGN_13333	8150	24.0368	25.9509	25.9141	28.3067	31.4847	30.4172	30.6258
DNA-Genome-Chondrus-crispus-GCA_000350225.2-2013-05-22.one_line	77592685	50	5	CATGN_13333	2000	25.35	26.15	27.6	30.1	38.9	33.7	35.4
DNA-Helicobacter-2019-04-24.one_line	2711601413	50	5	CATGN_13333	1550	25.4194	25.4194	27.3548	29.1613	38.9032	32.2581	34.3226
DNA-Genome-Salpingoeca-rosetta-GCA_000188695.1-2011-02-10.one_line	37299580	50	5	CATGN_13333	900	30	30	32.6667	33.1111	51.3333	39.7778	43.5556
DNA-NCBI-Virus-Complete-Nucleotide-Human-2020-05-11.one_line	470877038	50	5	CATGN_13333	500	35.2	30.2	39.6	39.2	66.8	46	52.8
DNA-Mitochondrion-2019-03-15.one_line	241606731	50	5	CATGN_13333	150	55.3333	37.3333	68	58	134.667	65.3333	88
DNA-Influenza-2019-04-27.one_line	1106180040	50	5	CATGN_13333	50	104	62	160	122	370	140	200
DNA-Genome-Fusarium-graminearum-PH-1-GCF_000240135.3-2008-11-21.one_line	34133023	50	5	CATGN_13333	50	102	68	160	120	370	142	200
DNA-Genome-Picea-abies-GCA_900067695.1-2016-11-09.one_line	11960690255	100	5	CATGN_13333	6200	23.7581	24.0968	24.8065	26.8871	29.0484	27.3548	27.8065
DNA-Genome-Chondrus-crispus-GCA_000350225.2-2013-05-22.one_line	77592685	100	5	CATGN_13333	5300	22.3585	23.8113	23.7736	26.4906	30.7736	28.5094	28.9057
DNA-Genome-Strongylocentrotus-purpuratus-GCF_000002235.4-2015-03-10.one_line	659082267	100	5	CATGN_13333	4400	23.4773	24.7727	25.1364	27.4318	32.6364	29.9318	30.6364
DNA-Helicobacter-2019-04-24.one_line	2711601413	100	5	CATGN_13333	1300	21.6154	18.8462	22.7692	24.9231	39.0769	27.6923	29.8462
DNA-NCBI-Virus-Complete-Nucleotide-Human-2020-05-11.one_line	470877038	100	5	CATGN_13333	800	29.875	27.5	32.75	34.375	52.75	39.75	44
DNA-Genome-Salpingoeca-rosetta-GCA_000188695.1-2011-02-10.one_line	37299580	100	5	CATGN_13333	600	33.6667	30.1667	37	36.3333	62.3333	44.6667	50.6667
DNA-Genome-Spironucleus-salmonicida-GCA_000497125.1-2013-11-19.one_line	9934367	100	5	CATGN_13333	100	71	44	92	75	190	86	116
DNA-Genome-Chondrus-crispus-GCA_000350225.2-2013-05-22.one_line	77592685	125	5	CATGN_13333	7000	21.7143	23.4857	23.0857	25.8286	29.4857	27.5571	27.8286
DNA-Genome-Strongylocentrotus-purpuratus-GCF_000002235.4-2015-03-10.one_line	659082267	125	5	CATGN_13333	4125	23.0788	24.3636	24.7758	27.0788	32.2182	29.9636	30.5455
DNA-Genome-Picea-abies-GCA_900067695.1-2016-11-09.one_line	11960690255	125	5	CATGN_13333	1875	27.2	27.0933	28.8	31.5733	39.1467	33.7067	35.4133
DNA-Genome-Salpingoeca-rosetta-GCA_000188695.1-2011-02-10.one_line	37299580	125	5	CATGN_13333	1500	27.2	27.2	29.4667	30.7333	42.9333	36.2	38.1333
DNA-Helicobacter-2019-04-24.one_line	2711601413	125	5	CATGN_13333	1125	24.4444	21.8667	25.7778	28.2667	42.5778	30.8444	33.4222
DNA-NCBI-Virus-Complete-Nucleotide-Human-2020-05-11.one_line	470877038	125	5	CATGN_13333	875	29.2571	23.4286	31.3143	32.4571	46.0571	34.1714	37.9429
DNA-Genome-Spironucleus-salmonicida-GCA_000497125.1-2013-11-19.one_line	9934367	125	5	CATGN_13333	250	45.2	31.2	52.8	47.2	156	58	72
DNA-Genome-Chondrus-crispus-GCA_000350225.2-2013-05-22.one_line	77592685	150	5	CATGN_13333	7650	21.7386	23.3203	23.1895	25.7386	28.8497	27.085	27.3464
DNA-Genome-Strongylocentrotus-purpuratus-GCF_000002235.4-2015-03-10.one_line	659082267	150	5	CATGN_13333	4950	22.2222	23.596	23.6768	25.7576	30.1212	28.2424	28.6061
DNA-Genome-Picea-abies-GCA_900067695.1-2016-11-09.one_line	11960690255	150	5	CATGN_13333	1800	27.3333	27.1667	29.2222	31.1111	39.5	33.8889	35.5556
DNA-NCBI-Virus-Complete-Nucleotide-Human-2020-05-11.one_line	470877038	150	5	CATGN_13333	1200	26.5833	21.9167	27.3333	29.1667	38.25	29.6667	32.3333
DNA-Helicobacter-2019-04-24.one_line	2711601413	150	5	CATGN_13333	600	29.3333	25.3333	32	33	57.6667	38	43.3333
DNA-Genome-Salpingoeca-rosetta-GCA_000188695.1-2011-02-10.one_line	37299580	150	5	CATGN_13333	600	33.3333	30.1667	36.6667	35.5	60.6667	43.3333	48.6667
DNA-Mitochondrion-2019-03-15.one_line	241606731	150	5	CATGN_13333	150	42	15.3333	50.6667	36	110.667	34.6667	56
DNA-Genome-Spironucleus-salmonicida-GCA_000497125.1-2013-11-19.one_line	9934367	150	5	CATGN_13333	150	138
DNA-Genome-Chondrus-crispus-GCA_000350225.2-2013-05-22.one_line	77592685	250	5	CATGN_13333	13750	20.7709	22.4655	21.8327	24.4145	26.9382	25.6509	25.5418
DNA-Genome-Strongylocentrotus-purpuratus-GCF_000002235.4-2015-03-10.one_line	659082267	250	5	CATGN_13333	4500	23.0444	24.4222	24.5333	26.6889	32.0222	29.6444	29.9556
DNA-NCBI-Virus-Complete-Nucleotide-Human-2020-05-11.one_line	470877038	250	5	CATGN_13333	1000	26.5	24.5	28.4	29.7	45.6	33.7	37.2
DNA-Genome-Salpingoeca-rosetta-GCA_000188695.1-2011-02-10.one_line	37299580	250	5	CATGN_13333	1000	27.1	25.2	28.8	29.6	45.4	34.1	37.6
DNA-Mitochondrion-2019-03-15.one_line	241606731	250	5	CATGN_13333	500	20.4	11.8	22.4	17	43.8	20	26.4
DNA-Genome-Picea-abies-GCA_900067695.1-2016-11-09.one_line	11960690255	250	5	CATGN_13333	250	46	34	55.2	48.8	100.4	58.8	72
DNA-Helicobacter-2019-04-24.one_line	2711601413	250	5	CATGN_13333	250	27.2	21.6	36.8	30.4	78.8	33.2	46.4
DNA-Genome-Fusarium-graminearum-PH-1-GCF_000240135.3-2008-11-21.one_line	34133023	250	5	CATGN_13333	250	44.8	29.6	52	46.8	98.4	56.8	70.4
DNA-Genome-Spironucleus-salmonicida-GCA_000497125.1-2013-11-19.one_line	9934367	250	5	CATGN_13333	250	46	36.8	52.8	47.6	57.2	70.4
DNA-Genome-Chondrus-crispus-GCA_000350225.2-2013-05-22.one_line	77592685	500	5	CATGN_13333	31500	19.6698	21.5111	20.5079	22.8476	23.8095	23.4571	23.4667
DNA-Genome-Strongylocentrotus-purpuratus-GCF_000002235.4-2015-03-10.one_line	659082267	500	5	CATGN_13333	2000	26.35	27.45	28.2	29.95	39.65	34.5	36.2
DNA-NCBI-Virus-Complete-Nucleotide-Human-2020-05-11.one_line	470877038	500	5	CATGN_13333	1000	25.5	19.5	24.4	27.3	39.1	27.8	30.8
DNA-Genome-Chondrus-crispus-GCA_000350225.2-2013-05-22.one_line	77592685	750	5	CATGN_13333	51000	20.5216	22.4745	21.2157	23.4608	23.9333	23.8098	23.702
DNA-NCBI-Virus-Complete-Nucleotide-Human-2020-05-11.one_line	470877038	750	5	CATGN_13333	2250	20.0889	14.9333	17.5111	22	24.8444	19.4222	20.6222
DNA-Genome-Chondrus-crispus-GCA_000350225.2-2013-05-22.one_line	77592685	1000	5	CATGN_13333	39000	20.9436	22.7667	21.6821	23.9615	24.4923	24.1744	24.0615
DNA-Genome-Salpingoeca-rosetta-GCA_000188695.1-2011-02-10.one_line	37299580	1000	5	CATGN_13333	1000	27	23.5	28.4	28	42.4	31.6	35.2
DNA-Genome-Chondrus-crispus-GCA_000350225.2-2013-05-22.one_line	77592685	2500	5	CATGN_13333	7500	22.8933	24.4667	24.16	26.32	29.3867	28.3467	28.32
DNA-Genome-Strongylocentrotus-purpuratus-GCF_000002235.4-2015-03-10.one_line	659082267	25	5	CGATN_12344	2750	27.4909	26.5455	30.1091	31.9636	39.5273	35.7818	36.9455
DNA-Genome-Picea-abies-GCA_900067695.1-2016-11-09.one_line	11960690255	25	5	CGATN_12344	1975	28.557	26.5316	31.2911	32.3038	42.6835	37.4177	39.0886
DNA-NCBI-Virus-Complete-Nucleotide-Human-2020-05-11.one_line	470877038	25	5	CGATN_12344	475	36.4211	27.5789	42.5263	40	70.9474	49.2632	56.4211
DNA-Genome-Chondrus-crispus-GCA_000350225.2-2013-05-22.one_line	77592685	25	5	CGATN_12344	475	36.8421	28.4211	41.6842	39.3684	71.7895	49.8947	57.2632
DNA-Helicobacter-2019-04-24.one_line	2711601413	25	5	CGATN_12344	150	56.6667	37.3333	73.3333	62	145.333	76	98.6667
DNA-Genome-Salpingoeca-rosetta-GCA_000188695.1-2011-02-10.one_line	37299580	25	5	CGATN_12344	150	56.6667	38	74.6667	60.6667	145.333	76	98.6667
DNA-Influenza-2019-04-27.one_line	1106180040	25	5	CGATN_12344	75	81.3333	46.6667	114.667	89.3333	244	106.667	144
DNA-Mitochondrion-2019-03-15.one_line	241606731	25	5	CGATN_12344	75	80	46.6667	114.667	92	238.667	101.333	138.667
DNA-Genome-Astrammina-rara-GCA_000211355.2-2011-04-27.one_line	1362918	25	5	CGATN_12344	75	80	46.6667	114.667	90.6667	242.667	104	144
DNA-Genome-Spironucleus-salmonicida-GCA_000497125.1-2013-11-19.one_line	9934367	25	5	CGATN_12344	25	160	96	284	196	640	220	336
DNA-Genome-WS1-bacterium-JGI-0000059-K21-GCA_000398605.1-2013-05-16.one_line	509551	25	5	CGATN_12344	25	156	96	284	196	640	224	336
DNA-Genome-Picea-abies-GCA_900067695.1-2016-11-09.one_line	11960690255	50	5	CGATN_12344	3350	25.791	26.2388	27.7612	29.5821	34.6866	31.5522	32.597
DNA-Genome-Strongylocentrotus-purpuratus-GCF_000002235.4-2015-03-10.one_line	659082267	50	5	CGATN_12344	2450	27.6327	27.551	30.1224	31.6735	40.2041	36.1224	37.3878
DNA-Genome-Chondrus-crispus-GCA_000350225.2-2013-05-22.one_line	77592685	50	5	CGATN_12344	1250	29.04	28.16	32.16	33.04	46.8	38.56	41.28
DNA-NCBI-Virus-Complete-Nucleotide-Human-2020-05-11.one_line	470877038	50	5	CGATN_12344	700	32.7143	27.8571	36.5714	36.1429	57	41.7143	46.2857
DNA-Helicobacter-2019-04-24.one_line	2711601413	50	5	CGATN_12344	250	44.8	30	53.6	48.8	99.2	57.6	70.4
DNA-Genome-Salpingoeca-rosetta-GCA_000188695.1-2011-02-10.one_line	37299580	50	5	CGATN_12344	200	50.5	35.5	62	54	119.5	68	84
DNA-Mitochondrion-2019-03-15.one_line	241606731	50	5	CGATN_12344	150	56.6667	36.6667	73.3333	62.6667	148	78.6667	101.333
DNA-Genome-Spironucleus-salmonicida-GCA_000497125.1-2013-11-19.one_line	9934367	50	5	CGATN_12344	50	100	60	156	112	370	134	192
DNA-Genome-Astrammina-rara-GCA_000211355.2-2011-04-27.one_line	1362918	50	5	CGATN_12344	50	102	62	164	116	370	142	200
DNA-Genome-WS1-bacterium-JGI-0000059-K21-GCA_000398605.1-2013-05-16.one_line	509551	50	5	CGATN_12344	50	98	58	160	120	370	132	192
DNA-Genome-Chondrus-crispus-GCA_000350225.2-2013-05-22.one_line	77592685	100	5	CGATN_12344	3400	24.7059	25.2647	26.7059	29.0588	34.5588	31.5	32.4706
DNA-Genome-Picea-abies-GCA_900067695.1-2016-11-09.one_line	11960690255	100	5	CGATN_12344	3000	26.1	26.1333	27.6667	30.1	34.9667	31.5	32.6667
DNA-NCBI-Virus-Complete-Nucleotide-Human-2020-05-11.one_line	470877038	100	5	CGATN_12344	2100	25.0952	20.9048	26.0952	28.1429	32.2381	27.3333	28.9524
DNA-Genome-Strongylocentrotus-purpuratus-GCF_000002235.4-2015-03-10.one_line	659082267	100	5	CGATN_12344	1300	29.7692	27.4615	31.8462	33.2308	45.5385	37.2308	39.6923
DNA-Mitochondrion-2019-03-15.one_line	241606731	100	5	CGATN_12344	200	50.5	36.5	62	53	120.5	68.5	86
DNA-Genome-Salpingoeca-rosetta-GCA_000188695.1-2011-02-10.one_line	37299580	100	5	CGATN_12344	200	50.5	39.5	61	52.5	117.5	66	82
DNA-Genome-WS1-bacterium-JGI-0000059-K21-GCA_000398605.1-2013-05-16.one_line	509551	100	5	CGATN_12344	200	50.5	35.5	62	53.5	121	69	86
DNA-Helicobacter-2019-04-24.one_line	2711601413	100	5	CGATN_12344	100	62	41	90	76	183	79	108
DNA-Genome-Spironucleus-salmonicida-GCA_000497125.1-2013-11-19.one_line	9934367	100	5	CGATN_12344	100	68	41	96	77	192	88	116
DNA-Genome-Chondrus-crispus-GCA_000350225.2-2013-05-22.one_line	77592685	125	5	CGATN_12344	4500	23.8	24.7778	25.5111	27.8444	32.0222	29.7111	30.4889
DNA-NCBI-Virus-Complete-Nucleotide-Human-2020-05-11.one_line	470877038	125	5	CGATN_12344	2250	25.3333	20.5778	26.5778	28.4	31.9556	27.0667	28.4444
DNA-Genome-Picea-abies-GCA_900067695.1-2016-11-09.one_line	11960690255	125	5	CGATN_12344	1125	29.6889	27.8222	31.6444	33.1556	47.1111	37.8667	40.8889
DNA-Genome-Strongylocentrotus-purpuratus-GCF_000002235.4-2015-03-10.one_line	659082267	125	5	CGATN_12344	250	44.8	32.8	54.4	46.4	102.8	61.2	75.2
DNA-Genome-Spironucleus-salmonicida-GCA_000497125.1-2013-11-19.one_line	9934367	125	5	CGATN_12344	250	45.2	32.4	56	50.8	103.2	61.6	75.2
DNA-Genome-Salpingoeca-rosetta-GCA_000188695.1-2011-02-10.one_line	37299580	125	5	CGATN_12344	125	62.4	38.4	81.6	66.4	166.4	84	105.6
DNA-Genome-WS1-bacterium-JGI-0000059-K21-GCA_000398605.1-2013-05-16.one_line	509551	125	5	CGATN_12344	125	61.6	40.8	81.6	64	166.4	83.2	105.6
DNA-Genome-Chondrus-crispus-GCA_000350225.2-2013-05-22.one_line	77592685	150	5	CGATN_12344	5400	23.2593	24.1296	24.8519	27.6111	30.7037	29.1481	29.4074
DNA-NCBI-Virus-Complete-Nucleotide-Human-2020-05-11.one_line	470877038	150	5	CGATN_12344	3750	22.9867	19.1467	23.7333	25.3867	26.32	23.68	24.32
DNA-Genome-Picea-abies-GCA_900067695.1-2016-11-09.one_line	11960690255	150	5	CGATN_12344	1650	27.8182	26.6667	29.8182	31.4545	40.0606	33.7576	35.8788
DNA-Genome-Strongylocentrotus-purpuratus-GCF_000002235.4-2015-03-10.one_line	659082267	150	5	CGATN_12344	1050	30.6667	28.6667	33.5238	34.5714	48.9524	38.9524	42.2857
DNA-Helicobacter-2019-04-24.one_line	2711601413	150	5	CGATN_12344	300	35.6667	28.6667	42.6667	41	79	44.3333	56
DNA-Genome-Salpingoeca-rosetta-GCA_000188695.1-2011-02-10.one_line	37299580	150	5	CGATN_12344	300	43.3333	35	50	44.6667	91	56.3333	68
DNA-Genome-Spironucleus-salmonicida-GCA_000497125.1-2013-11-19.one_line	9934367	150	5	CGATN_12344	300	42.3333	30.6667	50.6667	47.3333	92	58	69.3333
DNA-Genome-Chondrus-crispus-GCA_000350225.2-2013-05-22.one_line	77592685	250	5	CGATN_12344	9750	22.6359	24.2769	23.9179	26.5128	28.8821	27.7026	28.0615
DNA-NCBI-Virus-Complete-Nucleotide-Human-2020-05-11.one_line	470877038	250	5	CGATN_12344	4500	24.2222	21.5556	24.1778	27.3778	28.0222	25.8222	26.2222
DNA-Genome-Salpingoeca-rosetta-GCA_000188695.1-2011-02-10.one_line	37299580	250	5	CGATN_12344	1250	29.12	27.6	31.04	31.28	46	37.68	40.32
DNA-Genome-Picea-abies-GCA_900067695.1-2016-11-09.one_line	11960690255	250	5	CGATN_12344	500	36.4	30.2	40.8	39	67.6	46.8	53.6
DNA-Genome-WS1-bacterium-JGI-0000059-K21-GCA_000398605.1-2013-05-16.one_line	509551	250	5	CGATN_12344	500	36	29.6	41.6	38.2	69.6	48.8	55.2
DNA-Helicobacter-2019-04-24.one_line	2711601413	250	5	CGATN_12344	250	40.8	29.6	47.2	43.2	92.8	49.6	62.4
DNA-Genome-Spironucleus-salmonicida-GCA_000497125.1-2013-11-19.one_line	9934367	250	5	CGATN_12344	250	45.6	35.2	52	44.4	71.2	57.2	70.4
DNA-Genome-Chondrus-crispus-GCA_000350225.2-2013-05-22.one_line	77592685	500	5	CGATN_12344	16500	22.7818	24.2788	23.7697	26.3455	27.7758	26.8848	27.1273
DNA-NCBI-Virus-Complete-Nucleotide-Human-2020-05-11.one_line	470877038	500	5	CGATN_12344	7500	24.0267	23.0133	24.6133	27.4533	27.6667	26.3067	26.4533
DNA-Genome-Salpingoeca-rosetta-GCA_000188695.1-2011-02-10.one_line	37299580	500	5	CGATN_12344	2000	26.4	25	28.1	28.75	37.5	32.05	33.6
DNA-Genome-WS1-bacterium-JGI-0000059-K21-GCA_000398605.1-2013-05-16.one_line	509551	500	5	CGATN_12344	1500	28.3333	27.4	30.9333	31.4	44.6	37.9333	40
DNA-Genome-Spironucleus-salmonicida-GCA_000497125.1-2013-11-19.one_line	9934367	500	5	CGATN_12344	1000	49.9
DNA-Genome-Chondrus-crispus-GCA_000350225.2-2013-05-22.one_line	77592685	750	5	CGATN_12344	15000	22.9867	24.78	23.92	26.5	28.0867	27.4133	27.3867
DNA-NCBI-Virus-Complete-Nucleotide-Human-2020-05-11.one_line	470877038	750	5	CGATN_12344	11250	22.2667	18.7733	21.7067	24.5156	21.9911	21.1644	21.3689
DNA-Genome-Salpingoeca-rosetta-GCA_000188695.1-2011-02-10.one_line	37299580	750	5	CGATN_12344	2250	25.4222	23.3333	26.7556	27.5111	34.4889	29.6	31.1111
DNA-Genome-Strongylocentrotus-purpuratus-GCF_000002235.4-2015-03-10.one_line	659082267	750	5	CGATN_12344	750	31.7333	28.5333	34.4	35.0667	54.8	41.0667	45.3333
DNA-Genome-Spironucleus-salmonicida-GCA_000497125.1-2013-11-19.one_line	9934367	750	5	CGATN_12344	750	32.6667	28.8	35.4667	34.8	58.4	43.8667	48.5333
DNA-Genome-WS1-bacterium-JGI-0000059-K21-GCA_000398605.1-2013-05-16.one_line	509551	750	5	CGATN_12344	750	31.7333	28.1333	35.7333	35.2	57.4667	43.7333	48
DNA-Genome-Chondrus-crispus-GCA_000350225.2-2013-05-22.one_line	77592685	1000	5	CGATN_12344	19000	22.9789	25.0053	23.8842	26.3947	27.8789	27.1368	27.1789
DNA-NCBI-Virus-Complete-Nucleotide-Human-2020-05-11.one_line	470877038	1000	5	CGATN_12344	12000	20.5667	15.55	18.8667	22.3417	18.4333	17.9083	17.8333
DNA-Genome-Salpingoeca-rosetta-GCA_000188695.1-2011-02-10.one_line	37299580	1000	5	CGATN_12344	3000	25.6	24.7333	26.8667	27.8667	33.4333	30.2	31.0667
DNA-Genome-WS1-bacterium-JGI-0000059-K21-GCA_000398605.1-2013-05-16.one_line	509551	1000	5	CGATN_12344	2000	27.45	27.8	29.8	30.8	41.2	36.1	37.6
DNA-Genome-Spironucleus-salmonicida-GCA_000497125.1-2013-11-19.one_line	9934367	1000	5	CGATN_12344	1000	30.6	28.2	33	32.7	41.1	44.4
DNA-NCBI-Virus-Complete-Nucleotide-Human-2020-05-11.one_line	470877038	2500	5	CGATN_12344	25000	19.872	15.136	18.664	21.648	17	16.456	16.512
DNA-Genome-Chondrus-crispus-GCA_000350225.2-2013-05-22.one_line	77592685	2500	5	CGATN_12344	5000	25.14	26.54	26.4	28.48	32.96	30.98	31.2
DNA-Genome-Salpingoeca-rosetta-GCA_000188695.1-2011-02-10.one_line	37299580	2500	5	CGATN_12344	2500	23.24	19.36	20.64	25.2	28.4	24.16	25.28
DNA-Genome-WS1-bacterium-JGI-0000059-K21-GCA_000398605.1-2013-05-16.one_line	509551	2500	5	CGATN_12344	2500	26.64	27.64	28.72	29.76	38.48	34.68	35.68
DNA-NCBI-Virus-Complete-Nucleotide-Human-2020-05-11.one_line	470877038	5000	5	CGATN_12344	15000	23.2467	22.2933	22.12	26.1533	24.8	24.2067	24.2133
DNA-Genome-WS1-bacterium-JGI-0000059-K21-GCA_000398605.1-2013-05-16.one_line	509551	5000	5	CGATN_12344	5000	25.32	27.36	26.72	28.62	33.34	31.82	32
DNA-NCBI-Virus-Complete-Nucleotide-Human-2020-05-11.one_line	470877038	10000	5	CGATN_12344	20000	22.165	19.3	18.8	24.575	21.37	20.855	20.96
DNA-Genome-Strongylocentrotus-purpuratus-GCF_000002235.4-2015-03-10.one_line	659082267	25	5	CGNAT_12344	1475	26.4407	26.7797	29.4237	31.5932	41.2203	34.1695	36.339
DNA-Genome-Chondrus-crispus-GCA_000350225.2-2013-05-22.one_line	77592685	25	5	CGNAT_12344	825	29.0909	28.6061	32.2424	32.9697	50.4242	37.9394	41.697
DNA-Genome-Picea-abies-GCA_900067695.1-2016-11-09.one_line	11960690255	25	5	CGNAT_12344	425	35.7647	32.9412	40.4706	39.5294	68.7059	44.2353	51.7647
DNA-Genome-Salpingoeca-rosetta-GCA_000188695.1-2011-02-10.one_line	37299580	25	5	CGNAT_12344	225	47.5556	32.8889	56.8889	49.7778	105.333	59.5556	74.6667
DNA-NCBI-Virus-Complete-Nucleotide-Human-2020-05-11.one_line	470877038	25	5	CGNAT_12344	75	78.6667	46.6667	114.667	93.3333	241.333	102.667	144
DNA-Helicobacter-2019-04-24.one_line	2711601413	25	5	CGNAT_12344	25	148	84	284	192	640	192	304
DNA-Influenza-2019-04-27.one_line	1106180040	25	5	CGNAT_12344	25	160	96	284	208	640	216	336
DNA-Mitochondrion-2019-03-15.one_line	241606731	25	5	CGNAT_12344	25	148	96	284	208	640	196	320
DNA-Genome-Spironucleus-salmonicida-GCA_000497125.1-2013-11-19.one_line	9934367	25	5	CGNAT_12344	25	160	96	284	212	640	216	336
DNA-Genome-Chondrus-crispus-GCA_000350225.2-2013-05-22.one_line	77592685	50	5	CGNAT_12344	1300	24.9231	24.3077	27.5385	29.3077	41	33.0769	35.6923
DNA-Genome-Strongylocentrotus-purpuratus-GCF_000002235.4-2015-03-10.one_line	659082267	50	5	CGNAT_12344	550	32.9091	30.1818	37.0909	37.8182	61.2727	42	48.7273
DNA-Genome-Picea-abies-GCA_900067695.1-2016-11-09.one_line	11960690255	50	5	CGNAT_12344	500	32.6	27.8	36	36.8	61	40.2	47.2
DNA-NCBI-Virus-Complete-Nucleotide-Human-2020-05-11.one_line	470877038	50	5	CGNAT_12344	200	48	34.5	60	53	109.5	57.5	74
DNA-Genome-Spironucleus-salmonicida-GCA_000497125.1-2013-11-19.one_line	9934367	50	5	CGNAT_12344	150	54.6667	39.3333	68	59.3333	136.667	67.3333	90.6667
DNA-Helicobacter-2019-04-24.one_line	2711601413	50	5	CGNAT_12344	50	94	44	144	116	314	106	168
DNA-Genome-Chondrus-crispus-GCA_000350225.2-2013-05-22.one_line	77592685	100	5	CGNAT_12344	2900	21.931	22.069	23.931	26.3103	32.4138	28.4138	29.2414
DNA-Genome-Strongylocentrotus-purpuratus-GCF_000002235.4-2015-03-10.one_line	659082267	100	5	CGNAT_12344	200	47.5	35.5	58	51.5	111	58.5	76
DNA-Helicobacter-2019-04-24.one_line	2711601413	100	5	CGNAT_12344	100	48	33	74	61	164	56	84
DNA-Genome-Chondrus-crispus-GCA_000350225.2-2013-05-22.one_line	77592685	125	5	CGNAT_12344	2875	21.8087	22.3304	23.5826	25.9826	32.8696	28.7652	29.913
DNA-Genome-Strongylocentrotus-purpuratus-GCF_000002235.4-2015-03-10.one_line	659082267	125	5	CGNAT_12344	125	60.8	36.8	76.8	66.4	156.8	73.6	96
DNA-Genome-Spironucleus-salmonicida-GCA_000497125.1-2013-11-19.one_line	9934367	125	5	CGNAT_12344	125	159.2
DNA-Genome-Chondrus-crispus-GCA_000350225.2-2013-05-22.one_line	77592685	150	5	CGNAT_12344	2250	22.2222	21.8222	24.1778	26.8	34.9778	29.4222	30.7556
DNA-Genome-Strongylocentrotus-purpuratus-GCF_000002235.4-2015-03-10.one_line	659082267	150	5	CGNAT_12344	150	54	37.3333	66.6667	59.3333	132	62.6667	85.3333
DNA-Genome-Chondrus-crispus-GCA_000350225.2-2013-05-22.one_line	77592685	250	5	CGNAT_12344	2750	21.2727	20.6545	22.7636	24.9091	32.2909	27.6727	28.3636
DNA-Genome-Spironucleus-salmonicida-GCA_000497125.1-2013-11-19.one_line	9934367	250	5	CGNAT_12344	250	43.6	32.8	51.2	45.2	54.4	67.2
DNA-Genome-Chondrus-crispus-GCA_000350225.2-2013-05-22.one_line	77592685	500	5	CGNAT_12344	3000	22.1333	22.4	23.8	25.6667	33	28.9667	29.8667
DNA-NCBI-Virus-Complete-Nucleotide-Human-2020-05-11.one_line	470877038	500	5	CGNAT_12344	1000	20.6	15.2	20.6	22	33.4	21.6	24.8
DNA-Genome-Chondrus-crispus-GCA_000350225.2-2013-05-22.one_line	77592685	750	5	CGNAT_12344	3000	22.1667	22.5	23.8667	25.4	32.7333	28.9	29.8667
DNA-Genome-Picea-abies-GCA_900067695.1-2016-11-09.one_line	11960690255	25	5	CGNAT_22233	79425	21.628	25.7891	22.4992	24.9632	25.8735	25.8319	25.8004
DNA-Genome-Strongylocentrotus-purpuratus-GCF_000002235.4-2015-03-10.one_line	659082267	25	5	CGNAT_22233	66200	21.8399	24.9607	22.7764	25.4169	26.4169	26.2508	26.2961
DNA-Genome-Salpingoeca-rosetta-GCA_000188695.1-2011-02-10.one_line	37299580	25	5	CGNAT_22233	5700	22.5789	25.7544	24.3158	26.0702	31.1579	29.4737	29.8947
DNA-Genome-Chondrus-crispus-GCA_000350225.2-2013-05-22.one_line	77592685	25	5	CGNAT_22233	5675	22.4846	25.7974	24.4229	26.4141	31.2423	29.5683	30.0264
DNA-Helicobacter-2019-04-24.one_line	2711601413	25	5	CGNAT_22233	2675	24.2243	26.3551	26.4673	27.9626	35.8879	32.0374	33.1963
DNA-NCBI-Virus-Complete-Nucleotide-Human-2020-05-11.one_line	470877038	25	5	CGNAT_22233	1550	26.9677	26.2581	28.6452	29.6774	39.6774	32.9677	35.0968
DNA-Influenza-2019-04-27.one_line	1106180040	25	5	CGNAT_22233	1375	28.9455	29.3091	31.5636	32.7273	45.7455	38.1818	40.7273
DNA-Genome-Spironucleus-salmonicida-GCA_000497125.1-2013-11-19.one_line	9934367	25	5	CGNAT_22233	725	31.3103	31.5862	34.7586	33.7931	56	41.6552	46.3448
DNA-Genome-Fusarium-graminearum-PH-1-GCF_000240135.3-2008-11-21.one_line	34133023	25	5	CGNAT_22233	575	33.7391	31.6522	36.8696	36.5217	63.3043	45.0435	50.7826
DNA-Mitochondrion-2019-03-15.one_line	241606731	25	5	CGNAT_22233	175	55.4286	36.5714	67.4286	58.8571	130.857	71.4286	91.4286
DNA-Genome-Astrammina-rara-GCA_000211355.2-2011-04-27.one_line	1362918	25	5	CGNAT_22233	75	85.3333	53.3333	120	90.6667	280	112	149.333
DNA-Genome-Strongylocentrotus-purpuratus-GCF_000002235.4-2015-03-10.one_line	659082267	50	5	CGNAT_22233	101050	20.2385	22.8659	21.0015	23.3429	24.6947	24.4364	24.1544
DNA-Genome-Picea-abies-GCA_900067695.1-2016-11-09.one_line	11960690255	50	5	CGNAT_22233	18250	22.1041	24.6959	23.1781	24.9699	26.9041	26.3288	26.4986
DNA-Genome-Chondrus-crispus-GCA_000350225.2-2013-05-22.one_line	77592685	50	5	CGNAT_22233	17100	20.3918	23.0526	21.6257	23.7895	26.9415	25.9123	25.848
DNA-Genome-Salpingoeca-rosetta-GCA_000188695.1-2011-02-10.one_line	37299580	50	5	CGNAT_22233	14250	20.2877	22.807	21.5158	23.2702	27.2912	25.6281	25.8246
DNA-Helicobacter-2019-04-24.one_line	2711601413	50	5	CGNAT_22233	4150	22.1205	23.7831	23.6627	25.8072	31.3976	28.4578	29.3012
DNA-NCBI-Virus-Complete-Nucleotide-Human-2020-05-11.one_line	470877038	50	5	CGNAT_22233	2500	23.24	24.4	24.88	26.44	33.68	29.68	30.88
DNA-Genome-Spironucleus-salmonicida-GCA_000497125.1-2013-11-19.one_line	9934367	50	5	CGNAT_22233	1450	25.5172	26	27.5862	28.7586	41.6552	34.4828	36.6897
DNA-Influenza-2019-04-27.one_line	1106180040	50	5	CGNAT_22233	1250	28.32	26.4	30.72	31.36	45.04	36.72	39.36
DNA-Genome-Fusarium-graminearum-PH-1-GCF_000240135.3-2008-11-21.one_line	34133023	50	5	CGNAT_22233	1000	28.1	27.2	30.6	31.1	49.2	38.3	41.6
DNA-Mitochondrion-2019-03-15.one_line	241606731	50	5	CGNAT_22233	250	44	35.6	50.4	46.8	94.4	53.2	65.6
DNA-Genome-Astrammina-rara-GCA_000211355.2-2011-04-27.one_line	1362918	50	5	CGNAT_22233	150	61.3333	41.3333	76	62.6667	147.333	78	101.333
DNA-Genome-Strongylocentrotus-purpuratus-GCF_000002235.4-2015-03-10.one_line	659082267	100	5	CGNAT_22233	212900	19.8403	22.4763	20.3711	22.3819	23.3429	23.2485	23.1226
DNA-Genome-Salpingoeca-rosetta-GCA_000188695.1-2011-02-10.one_line	37299580	100	5	CGNAT_22233	38800	19.1237	21.634	19.9124	21.6624	23.5515	23.4639	23.1753
DNA-Genome-Chondrus-crispus-GCA_000350225.2-2013-05-22.one_line	77592685	100	5	CGNAT_22233	34300	19.07	21.5131	19.9708	22.1808	23.8717	23.3732	23.4636
DNA-Helicobacter-2019-04-24.one_line	2711601413	100	5	CGNAT_22233	6800	20.4853	21.3824	21.4706	23.7059	26.9559	24.5882	25.0588
DNA-NCBI-Virus-Complete-Nucleotide-Human-2020-05-11.one_line	470877038	100	5	CGNAT_22233	3600	21.3611	20.8333	22.5556	24.3333	29.6389	25.25	26.1111
DNA-Genome-Spironucleus-salmonicida-GCA_000497125.1-2013-11-19.one_line	9934367	100	5	CGNAT_22233	3600	21.9167	23.4722	23.3333	24.8056	32.8056	28.8333	29.4444
DNA-Genome-Fusarium-graminearum-PH-1-GCF_000240135.3-2008-11-21.one_line	34133023	100	5	CGNAT_22233	2200	23.1364	23.1818	24.7273	26.2727	37.7727	31.8636	32.9091
DNA-Influenza-2019-04-27.one_line	1106180040	100	5	CGNAT_22233	400	36	30.5	40	36	74	48	56
DNA-Genome-Astrammina-rara-GCA_000211355.2-2011-04-27.one_line	1362918	100	5	CGNAT_22233	200	52.5	40	63	56	120.5	68.5	86
DNA-Mitochondrion-2019-03-15.one_line	241606731	100	5	CGNAT_22233	100	69	41	90	73	187	84	112
DNA-Genome-Strongylocentrotus-purpuratus-GCF_000002235.4-2015-03-10.one_line	659082267	125	5	CGNAT_22233	194500	20.2149	22.8535	20.7321	22.729	23.8283	23.5357	23.4591
DNA-Genome-Salpingoeca-rosetta-GCA_000188695.1-2011-02-10.one_line	37299580	125	5	CGNAT_22233	52500	18.8895	21.3238	19.5733	21.2838	22.7257	22.7905	22.4305
DNA-Genome-Chondrus-crispus-GCA_000350225.2-2013-05-22.one_line	77592685	125	5	CGNAT_22233	44000	18.5773	20.925	19.3909	21.525	22.7705	22.7955	22.4364
DNA-Helicobacter-2019-04-24.one_line	2711601413	125	5	CGNAT_22233	4750	20.4421	21.7474	21.6421	24.1684	28.6526	25.9368	26.1895
DNA-Genome-Spironucleus-salmonicida-GCA_000497125.1-2013-11-19.one_line	9934367	125	5	CGNAT_22233	3875	21.3419	22.8903	22.9677	24.3097	34.64	28.2065	28.5935
DNA-NCBI-Virus-Complete-Nucleotide-Human-2020-05-11.one_line	470877038	125	5	CGNAT_22233	3375	21.363	20.8593	22.637	24.3852	31.6148	26.1037	27.0222
DNA-Genome-Fusarium-graminearum-PH-1-GCF_000240135.3-2008-11-21.one_line	34133023	125	5	CGNAT_22233	2000	22.95	22.8	24.5	25.4	37.45	31.4	32.8
DNA-Influenza-2019-04-27.one_line	1106180040	125	5	CGNAT_22233	875	30.7429	26.4	33.1429	32.4571	52.4571	39.3143	42.9714
DNA-Genome-Astrammina-rara-GCA_000211355.2-2011-04-27.one_line	1362918	125	5	CGNAT_22233	375	42.1333	35.7333	46.9333	44.8	82.6667	54.9333	64
DNA-Genome-Strongylocentrotus-purpuratus-GCF_000002235.4-2015-03-10.one_line	659082267	150	5	CGNAT_22233	121650	19.0629	21.3103	19.6054	21.478	22.5425	22.4669	22.1948
DNA-Genome-Salpingoeca-rosetta-GCA_000188695.1-2011-02-10.one_line	37299580	150	5	CGNAT_22233	69300	18.6494	21.0317	19.2929	20.8961	22.1356	22.4416	22.101
DNA-Genome-Chondrus-crispus-GCA_000350225.2-2013-05-22.one_line	77592685	150	5	CGNAT_22233	54900	18.5847	20.9472	19.3443	21.4772	22.4408	22.5337	22.3169
DNA-NCBI-Virus-Complete-Nucleotide-Human-2020-05-11.one_line	470877038	150	5	CGNAT_22233	6000	19.1333	18.1167	20.0333	21.8	25.2833	21.5667	21.6667
DNA-Helicobacter-2019-04-24.one_line	2711601413	150	5	CGNAT_22233	5700	20.1228	21.9825	21.2632	23.4561	27.7895	25.7544	25.8246
DNA-Genome-Spironucleus-salmonicida-GCA_000497125.1-2013-11-19.one_line	9934367	150	5	CGNAT_22233	3600	21.1111	22.1667	22.4444	24.0833	31.4	27.75	28.1111
DNA-Genome-Fusarium-graminearum-PH-1-GCF_000240135.3-2008-11-21.one_line	34133023	150	5	CGNAT_22233	2400	22.0833	22.2917	23.6667	25	35.375	30.0833	31
DNA-Influenza-2019-04-27.one_line	1106180040	150	5	CGNAT_22233	450	34.4444	28.2222	37.7778	36.6667	70.8889	45.1111	52.4444
DNA-Mitochondrion-2019-03-15.one_line	241606731	150	5	CGNAT_22233	450	32.2222	26	36	35.1111	67.5556	42.6667	49.7778
DNA-Genome-Astrammina-rara-GCA_000211355.2-2011-04-27.one_line	1362918	150	5	CGNAT_22233	300	46.3333	36.6667	52.6667	48.6667	92	57.3333	68
DNA-Genome-Salpingoeca-rosetta-GCA_000188695.1-2011-02-10.one_line	37299580	250	5	CGNAT_22233	124500	18.3165	20.6201	18.9028	20.4739	21.0313	21.3703	21.2305
DNA-Genome-Chondrus-crispus-GCA_000350225.2-2013-05-22.one_line	77592685	250	5	CGNAT_22233	93750	18.352	20.6603	19.0613	21.0176	21.3813	21.6576	21.4528
DNA-Genome-Strongylocentrotus-purpuratus-GCF_000002235.4-2015-03-10.one_line	659082267	250	5	CGNAT_22233	92250	19.703	21.6791	20.2472	22.0672	22.7621	22.6244	22.4564
DNA-Helicobacter-2019-04-24.one_line	2711601413	250	5	CGNAT_22233	6500	19.7538	21.0462	20.7077	22.8308	27.0769	24.3846	24.4923
DNA-NCBI-Virus-Complete-Nucleotide-Human-2020-05-11.one_line	470877038	250	5	CGNAT_22233	6500	19.6615	18.8769	19.8462	22.5538	23.9231	22.0308	22.1538
DNA-Genome-Fusarium-graminearum-PH-1-GCF_000240135.3-2008-11-21.one_line	34133023	250	5	CGNAT_22233	5000	20.3	21.42	21.56	22.74	28.38	26.16	26.24
DNA-Genome-Spironucleus-salmonicida-GCA_000497125.1-2013-11-19.one_line	9934367	250	5	CGNAT_22233	4750	19.4105	20.5895	20.7158	22.3158	27.0154	25.7474	25.8526
DNA-Genome-Salpingoeca-rosetta-GCA_000188695.1-2011-02-10.one_line	37299580	500	5	CGNAT_22233	442500	18.9975	21.1973	19.4459	21.0741	20.906	21.0463	20.9501
DNA-Genome-Chondrus-crispus-GCA_000350225.2-2013-05-22.one_line	77592685	500	5	CGNAT_22233	299000	18.7896	21.2331	19.3726	21.2321	21.2445	21.3849	21.2388
DNA-Genome-Strongylocentrotus-purpuratus-GCF_000002235.4-2015-03-10.one_line	659082267	500	5	CGNAT_22233	55000	18.6564	20.4164	19.2364	20.7636	21.3527	21.7055	21.4982
DNA-Genome-Spironucleus-salmonicida-GCA_000497125.1-2013-11-19.one_line	9934367	500	5	CGNAT_22233	16500	18.3091	20.2848	19.2727	20.7818	23.0903	22.2303	22.2061
DNA-NCBI-Virus-Complete-Nucleotide-Human-2020-05-11.one_line	470877038	500	5	CGNAT_22233	12500	18.12	16.824	17.808	20.392	20.08	18.88	18.976
DNA-Genome-Fusarium-graminearum-PH-1-GCF_000240135.3-2008-11-21.one_line	34133023	500	5	CGNAT_22233	12500	19.792	21.608	20.656	21.96	25.112	24.528	24.352
DNA-Helicobacter-2019-04-24.one_line	2711601413	500	5	CGNAT_22233	2000	23.6	23.55	25.1	27	36.8	31.05	32.4
DNA-Genome-Salpingoeca-rosetta-GCA_000188695.1-2011-02-10.one_line	37299580	750	5	CGNAT_22233	332250	17.9404	19.634	18.3795	19.8357	19.4405	19.7968	19.6202
DNA-Genome-Chondrus-crispus-GCA_000350225.2-2013-05-22.one_line	77592685	750	5	CGNAT_22233	252000	18.0397	20.2714	18.596	20.4032	20.2425	20.4841	20.4444
DNA-Genome-Strongylocentrotus-purpuratus-GCF_000002235.4-2015-03-10.one_line	659082267	750	5	CGNAT_22233	43500	18.7103	20.0736	19.2322	20.7057	21.377	21.3103	21.2966
DNA-Genome-Spironucleus-salmonicida-GCA_000497125.1-2013-11-19.one_line	9934367	750	5	CGNAT_22233	19500	18.7385	20.6615	19.5487	20.9846	22.1444	22.4923	22.4205
DNA-NCBI-Virus-Complete-Nucleotide-Human-2020-05-11.one_line	470877038	750	5	CGNAT_22233	15000	16.72	13.8533	16.4533	18.4867	17.0933	15.8067	15.8667
DNA-Genome-Fusarium-graminearum-PH-1-GCF_000240135.3-2008-11-21.one_line	34133023	750	5	CGNAT_22233	12000	18.8667	20.55	19.8667	20.9083	23.9333	23.0583	23.1
DNA-Genome-Salpingoeca-rosetta-GCA_000188695.1-2011-02-10.one_line	37299580	1000	5	CGNAT_22233	455000	17.8699	19.1576	18.2769	19.6571	18.8585	19.196	19.0224
DNA-Genome-Chondrus-crispus-GCA_000350225.2-2013-05-22.one_line	77592685	1000	5	CGNAT_22233	340000	18.0079	20.0747	18.5059	20.3221	19.9547	20.2685	20.1824
DNA-Genome-Strongylocentrotus-purpuratus-GCF_000002235.4-2015-03-10.one_line	659082267	1000	5	CGNAT_22233	35000	18.78	20.0571	19.36	20.6971	21.4943	21.4457	21.36
DNA-NCBI-Virus-Complete-Nucleotide-Human-2020-05-11.one_line	470877038	1000	5	CGNAT_22233	15000	16.3733	12.9667	15.6533	18.2533	15.7733	14.6533	14.6933
DNA-Genome-Spironucleus-salmonicida-GCA_000497125.1-2013-11-19.one_line	9934367	1000	5	CGNAT_22233	14000	19.6429	21.5	20.5143	21.95	22.16	23.7429	23.5143
DNA-Genome-Fusarium-graminearum-PH-1-GCF_000240135.3-2008-11-21.one_line	34133023	1000	5	CGNAT_22233	9000	19.4889	21.0889	20.4	21.5556	25.3222	24.1889	24.3111
DNA-Mitochondrion-2019-03-15.one_line	241606731	1000	5	CGNAT_22233	1000	22.5	18.8	23	23	36.5	25.3	28.8
DNA-Genome-Salpingoeca-rosetta-GCA_000188695.1-2011-02-10.one_line	37299580	2500	5	CGNAT_22233	1182500	17.9285	19.7246	18.2092	19.7526	18.9136	19.3121	19.3045
DNA-Genome-Chondrus-crispus-GCA_000350225.2-2013-05-22.one_line	77592685	2500	5	CGNAT_22233	682500	18.0788	19.5599	18.4604	20.1245	19.4482	19.9459	19.789
DNA-Genome-Spironucleus-salmonicida-GCA_000497125.1-2013-11-19.one_line	9934367	2500	5	CGNAT_22233	22500	18.9111	20.9467	19.5467	20.9156	22.6	22.4311	22.4533
DNA-NCBI-Virus-Complete-Nucleotide-Human-2020-05-11.one_line	470877038	2500	5	CGNAT_22233	20000	17.84	15.905	17.51	19.78	19.1	18.74	18.8
DNA-Genome-Fusarium-graminearum-PH-1-GCF_000240135.3-2008-11-21.one_line	34133023	2500	5	CGNAT_22233	15000	19.3667	20.0267	19.96	21.3	22.56	22.1733	22.2133
DNA-Genome-Strongylocentrotus-purpuratus-GCF_000002235.4-2015-03-10.one_line	659082267	2500	5	CGNAT_22233	10000	16.78	15.49	16.86	17.93	18.35	17.61	17.8
DNA-Genome-Salpingoeca-rosetta-GCA_000188695.1-2011-02-10.one_line	37299580	5000	5	CGNAT_22233	1600000	17.9156	19.6114	18.0844	19.8201	18.8314	19.1541	19.1158
DNA-Genome-Chondrus-crispus-GCA_000350225.2-2013-05-22.one_line	77592685	5000	5	CGNAT_22233	680000	18.4599	20.0225	18.7938	20.5182	20.2038	20.5197	20.4594
DNA-Genome-Strongylocentrotus-purpuratus-GCF_000002235.4-2015-03-10.one_line	659082267	5000	5	CGNAT_22233	20000	18.57	18.76	18.98	20.14	20.435	20.415	20.42
DNA-Genome-Fusarium-graminearum-PH-1-GCF_000240135.3-2008-11-21.one_line	34133023	5000	5	CGNAT_22233	20000	16.055	11.275	14.91	17.39	13.25	12.93	12.98
DNA-NCBI-Virus-Complete-Nucleotide-Human-2020-05-11.one_line	470877038	5000	5	CGNAT_22233	10000	17.32	17.65	18.14	19.48	21.05	20.18	20.4
DNA-Genome-Spironucleus-salmonicida-GCA_000497125.1-2013-11-19.one_line	9934367	5000	5	CGNAT_22233	10000	20.23	22.15	21.02	22.35	25.24	25.02	24.84
DNA-Genome-Salpingoeca-rosetta-GCA_000188695.1-2011-02-10.one_line	37299580	10000	5	CGNAT_22233	2230000	17.8732	19.4801	17.928	19.7799	18.6677	18.9483	18.948
DNA-Genome-Chondrus-crispus-GCA_000350225.2-2013-05-22.one_line	77592685	10000	5	CGNAT_22233	530000	18.6087	20.4402	18.8709	20.5879	20.3262	20.6202	20.446
DNA-NCBI-Virus-Complete-Nucleotide-Human-2020-05-11.one_line	470877038	10000	5	CGNAT_22233	70000	16.1071	11.3529	15.2029	17.6729	12.0343	12.0614	12.0171
DNA-Genome-Fusarium-graminearum-PH-1-GCF_000240135.3-2008-11-21.one_line	34133023	10000	5	CGNAT_22233	20000	19.18	17.92	19.41	20.635	19.75	19.68	19.56
DNA-Genome-Strongylocentrotus-purpuratus-GCF_000002235.4-2015-03-10.one_line	659082267	25	5	CGTAN_12344	3775	26.9669	25.8278	29.351	31.3907	37.2715	34.4636	35.3907
DNA-Genome-Picea-abies-GCA_900067695.1-2016-11-09.one_line	11960690255	25	5	CGTAN_12344	2350	28.0851	26.383	30.6383	32.2128	41.0638	36.6809	38.1277
DNA-NCBI-Virus-Complete-Nucleotide-Human-2020-05-11.one_line	470877038	25	5	CGTAN_12344	625	33.12	27.36	37.12	35.68	59.04	42.24	48
DNA-Genome-Chondrus-crispus-GCA_000350225.2-2013-05-22.one_line	77592685	25	5	CGTAN_12344	475	36.6316	28.2105	42.1053	38.9474	70.5263	48.6316	55.5789
DNA-Helicobacter-2019-04-24.one_line	2711601413	25	5	CGTAN_12344	250	46	35.6	54.4	49.2	98.8	57.2	70.4
DNA-Genome-Salpingoeca-rosetta-GCA_000188695.1-2011-02-10.one_line	37299580	25	5	CGTAN_12344	250	47.6	33.2	56.8	49.6	105.6	64	76.8
DNA-Influenza-2019-04-27.one_line	1106180040	25	5	CGTAN_12344	175	54.2857	37.1429	68.5714	57.1429	129.143	69.7143	89.1429
DNA-Mitochondrion-2019-03-15.one_line	241606731	25	5	CGTAN_12344	150	58.6667	37.3333	74.6667	64.6667	146.667	77.3333	98.6667
DNA-Genome-Astrammina-rara-GCA_000211355.2-2011-04-27.one_line	1362918	25	5	CGTAN_12344	50	102	60	160	122	370	140	200
DNA-Genome-WS1-bacterium-JGI-0000059-K21-GCA_000398605.1-2013-05-16.one_line	509551	25	5	CGTAN_12344	50	102	56	160	114	370	138	200
[truncated: 31,603 more rows]
